# Supplementary material for: Floral Transcriptome Sequencing for SSR Marker Development and Linkage Map Construction in the Tea Plant (Camellia sinensis)
Source: PLOS journal article supplement (doi:10.1371/journal.pone.0081611), 2013-11-26

**Supporting Image 1. Genomic DNA extracted from F<sub>1</sub> hybrids using a DP305 plant DNA extraction kit (Tiangen, Beijing, PR China).**

Genomic DNA was resolved on 1% agarose gel and visualized by ethidium bromide staining.

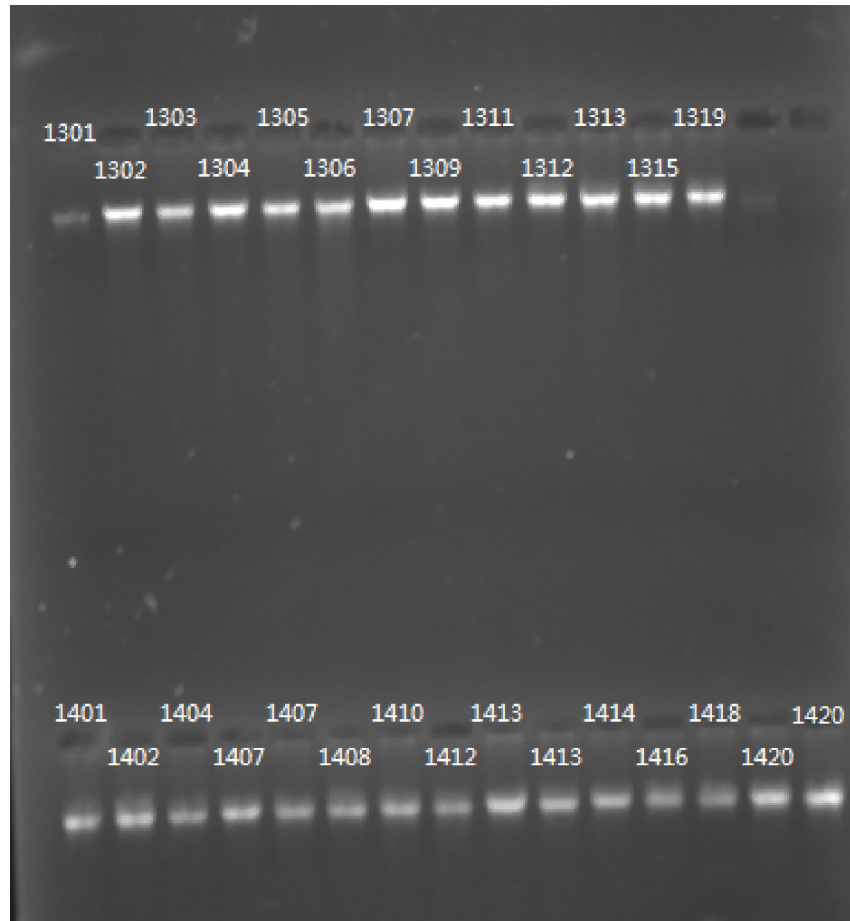

**Supporting Image 2. Validation and characterization of SSR markers with 8 tea plant cultivars.**

PCR products were resolved on 10% polyacrylamide gel and visualized by silver staining. Lanes 1–8: Changyebaihao, Fudingdabaicha, Baihaozao, Longjin43, Wuniuzao, Huangyan, Tieguanyin and Mingshanbaihao; M: DNA ladder

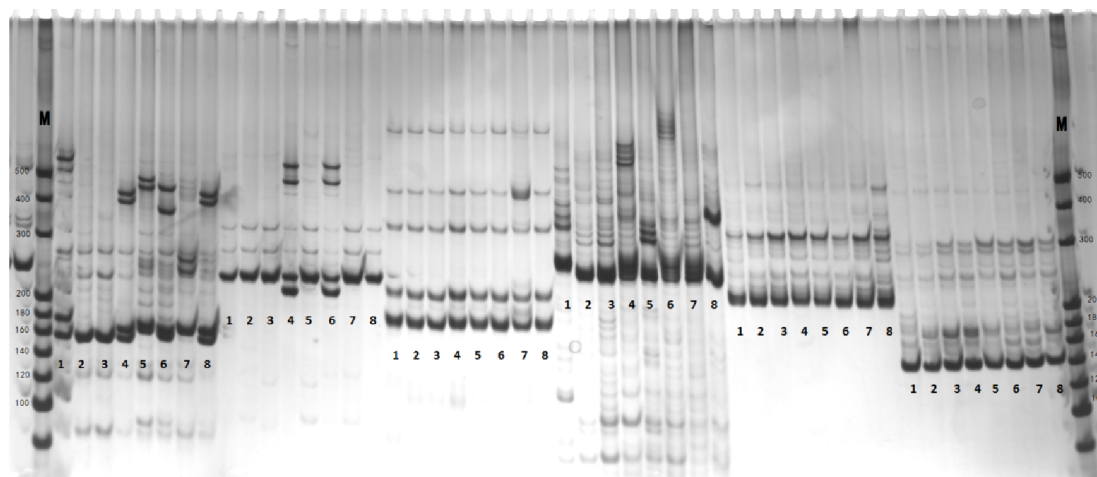

### Supporting Image 3. Genotyping in the mapping population

(Marker: CsFM1459; targeted size: 253bp; segregation type:  $ef \times eg$ )

PCR products were resolved on 10% polyacrylamide gels and visualized by silver staining. ♀ (lanes 47 and 143): Longjin43; ♂ (lanes 48 and 144): Baihaozao; lanes 1–46, 49–142 and 145–192: F<sub>1</sub> hybrids; M: DNA ladders.

#### P1-1

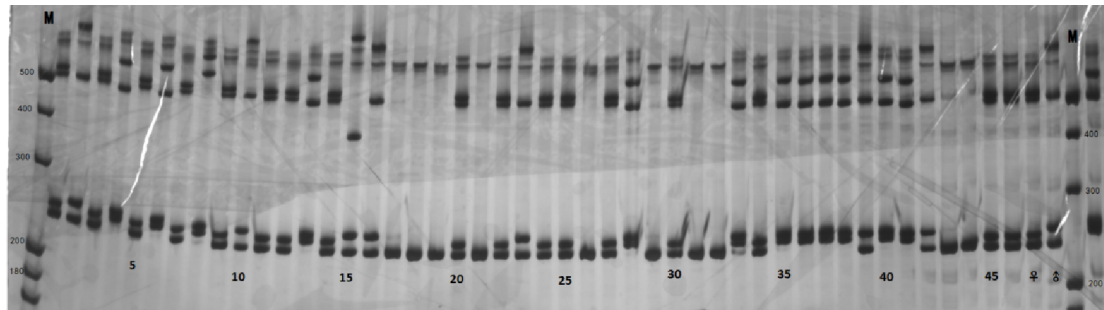

#### P1-2

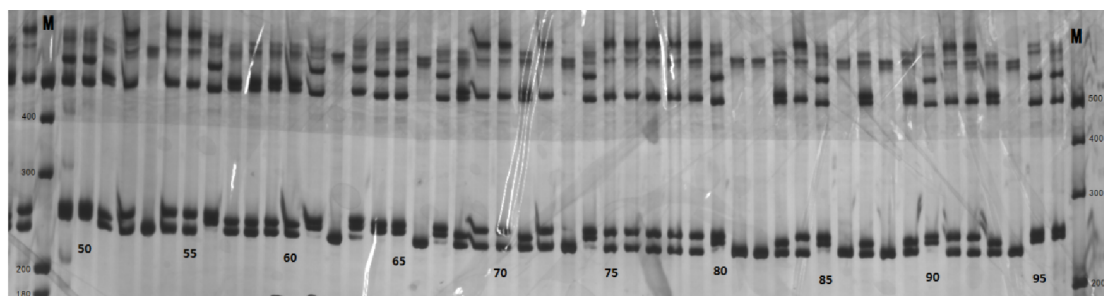

#### P2-1

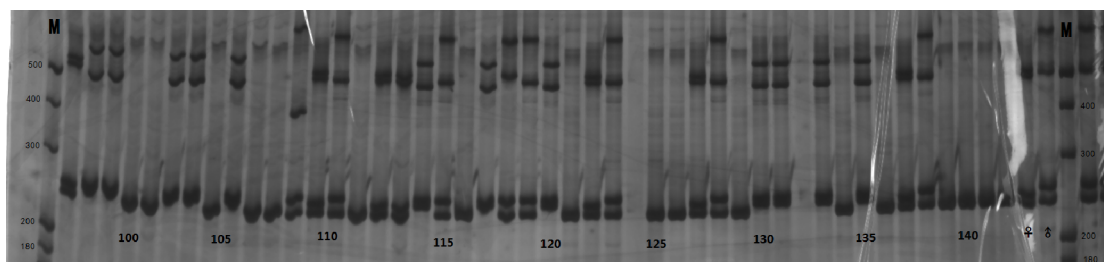

#### P2-2

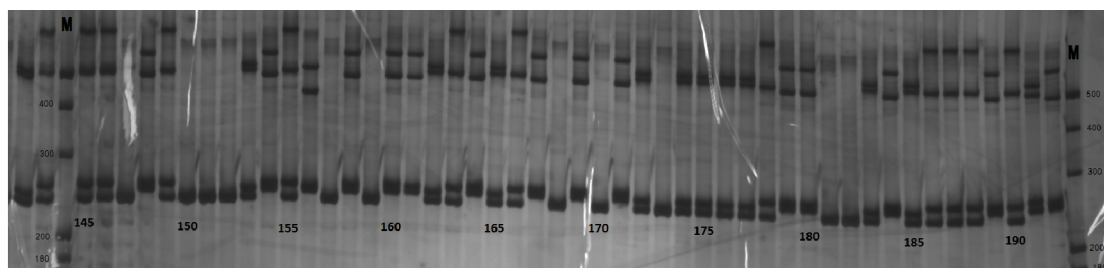

Supplement: S8 (10.1371/journal.pone.0081611.s008) [file journal.pone.0081611.s008]
