# Supplementary material for: Floral Transcriptome Sequencing for SSR Marker Development and Linkage Map Construction in the Tea Plant (Camellia sinensis)
Source: PLoS One. 2013 Nov 26;8(11):e81611. doi: 10.1371/journal.pone.0081611 (PMC3841144; doi:10.1371/journal.pone.0081611)
Supplement: Table S2 — Annotation information of the 75,531 unigenes obtained from C. sinensis floral transcriptome. (XLSX) [file pone.0081611.s002.xlsx]

## Sheet: Sheet1
Table S2: Annotation information of the 75,531 unigenes obtained from C. sinensis floral transcriptome
Unigene ID	GeneBank ID	Length	Raw reads(8506616)	RPKM	Nr-ID	Nr-Score	Nr-Evalue	Nr-annotation	Swissprot-ID	Swissprot-Score	Swissprot-Evalue	Swissprot-annotation	COG-Protein-or-Domain	COG-Score	COG-Evalue	COG-ID	COG-Function-Description	KO_id	KEGG-Evalue	KEGG-Score	KEGG-Gene	ko_definition	GO-Biological Process	GO-MolecularFunction	Go-CellularComponent
fd_1	--	677	47	8.1612	gi|18397514|ref|NP_566278.1|	264	9e-79	FRS7 (FAR1-related sequence 7); zinc ion binding [Arabidopsis thaliana] >gi|75186401|sp|Q9M8J3.1|FRS7_ARATH RecName: Full=Protein FAR1-RELATED SEQUENCE 7	sp|Q9M8J3|FRS7_ARATH	264	5e-79	Protein FAR1-RELATED SEQUENCE 7 OS=Arabidopsis thaliana GN=FRS7 PE=2 SV=1	--	--	--	--	--	--	--	--	--	--	GO:0009416//response to light stimulus	GO:0046914//transition metal ion binding	-
fd_2	GAAC01000001	426	103	28.4231	gi|297822385|ref|XP_002879075.1|	261	1e-69	kelch repeat-containing serine/threonine phosphoesterase family protein [Arabidopsis lyrata subsp. lyrata] >gi|297324914|gb|EFH55334.1| kelch repeat-containing serine/threonine phosphoesterase family protein [Arabidopsis lyrata subsp. lyrata]	sp|Q9SHS7|BSL3_ARATH	261	7e-70	Serine/threonine-protein phosphatase BSL3 OS=Arabidopsis thaliana GN=BSL3 PE=1 SV=2	--	--	--	--	--	K01090	2e-31	130	ath:AT4G03080	protein phosphatase [EC:3.1.3.16]	-	GO:0004721//phosphoprotein phosphatase activity;GO:0046914//transition metal ion binding	GO:0016020//membrane
fd_3	GAAC01000002	233	120	60.5436	gi|115466004|ref|NP_001056601.1|	137	4e-32	Os06g0114000 [Oryza sativa Japonica Group] >gi|113594641|dbj|BAF18515.1| Os06g0114000 [Oryza sativa Japonica Group] >gi|164375533|gb|ABY52934.1| RuBisCo subunit binding-protein beta subunit [Oryza sativa Japonica Group]	sp|Q43831|RUBB_SECCE	135	1e-31	RuBisCO large subunit-binding protein subunit beta, chloroplastic (Fragment) OS=Secale cereale GN=CPN60 PE=2 SV=1	sll0416	84.3	5e-17	COG0459	Chaperonin GroEL (HSP60 family)	K04077	8e-32	131	osa:4327993	chaperonin GroEL	GO:0051084//'de novo' posttranslational protein folding;GO:0009814//defense response, incompatible interaction	GO:0005515//protein binding;GO:0032559//adenyl ribonucleotide binding	GO:0005840//ribosome;GO:0031981//nuclear lumen;GO:0009532//plastid stroma;GO:0009526//plastid envelope;GO:0005576//extracellular region;GO:0016020//membrane
fd_4	GAAC01000003	221	8	4.2554	gi|145652361|gb|ABP88235.1|	60.5	6e-09	transcription factor bZIP102 [Glycine max]	--	--	--	--	--	--	--	--	--	--	--	--	--	--	GO:0010468//regulation of gene expression;GO:0006351//transcription, DNA-dependent	GO:0003677//DNA binding;GO:0005515//protein binding	GO:0043231//intracellular membrane-bounded organelle
fd_5	GAAC01000004	508	45	10.4134	gi|77403837|dbj|BAE46407.1|	291	2e-78	cytochrome b561 [Citrullus lanatus]	sp|Q95245|CY561_PIG	128	2e-29	Cytochrome b561 OS=Sus scrofa GN=CYB561 PE=2 SV=1	--	--	--	--	--	K08360	6e-78	286	ath:AT5G38630	cytochrome b-561	-	-	GO:0031224//intrinsic to membrane;GO:0031410//cytoplasmic vesicle
fd_6	GAAC01000005	368	53	16.9306	gi|297802472|ref|XP_002869120.1|	127	4e-29	amidase family protein [Arabidopsis lyrata subsp. lyrata] >gi|297314956|gb|EFH45379.1| amidase family protein [Arabidopsis lyrata subsp. lyrata]	--	--	--	--	CC2473	49.3	2e-06	COG0154	Asp-tRNAAsn/Glu-tRNAGln amidotransferase A subunit and related amidases	--	--	--	--	--	-	GO:0016787//hydrolase activity;GO:0016879//ligase activity, forming carbon-nitrogen bonds	-
fd_7	GAAC01000006	1095	232	24.9067	gi|297809901|ref|XP_002872834.1|	475	1e-133	AAA-type ATPase family protein [Arabidopsis lyrata subsp. lyrata] >gi|297318671|gb|EFH49093.1| AAA-type ATPase family protein [Arabidopsis lyrata subsp. lyrata]	sp|Q6NW58|SPAST_DANRE	209	2e-53	Spastin OS=Danio rerio GN=spast PE=2 SV=2	ECU11g1030	206	8e-53	COG0464	ATPases of the AAA+ class	K01509	4e-56	215	olu:OSTLU_6399	adenosinetriphosphatase [EC:3.6.1.3]	-	-	-
fd_8	GAAC01000007	272	49	21.1773	gi|77563563|gb|ABB00038.1|	95.9	1e-19	reverse transcriptase family member [Glycine max]	--	--	--	--	--	--	--	--	--	--	--	--	--	--	-	GO:0003676//nucleic acid binding;GO:0016740//transferase activity	-
fd_9	--	199	8	4.7259	--	--	--	--	--	--	--	--	--	--	--	--	--	--	--	--	--	--	-	-	-
fd_10	GAAC01000008	243	20	9.6754	gi|302142552|emb|CBI19755.3|	60.8	4e-09	unnamed protein product [Vitis vinifera]	--	--	--	--	--	--	--	--	--	--	--	--	--	--	-	-	-
fd_11	--	171	13	8.937	gi|297804040|ref|XP_002869904.1|	55.8	1e-07	ribophorin II family protein [Arabidopsis lyrata subsp. lyrata] >gi|297315740|gb|EFH46163.1| ribophorin II family protein [Arabidopsis lyrata subsp. lyrata]	--	--	--	--	--	--	--	--	--	--	--	--	--	--	GO:0006950//response to stress;GO:0006487//protein amino acid N-linked glycosylation	GO:0004576//oligosaccharyl transferase activity	GO:0005789//endoplasmic reticulum membrane;GO:0005618//cell wall
fd_12	GAAC01000009	368	93	29.7083	gi|166245160|dbj|BAG06272.1|	252	1e-66	cellulose synthase Z632 [Zinnia elegans]	sp|Q8L778|CESA5_ARATH	248	8e-66	Cellulose synthase A catalytic subunit 5 [UDP-forming] OS=Arabidopsis thaliana GN=CESA5 PE=1 SV=2	--	--	--	--	--	K10999	5e-69	255	vvi:100255463	cellulose synthase A [EC:2.4.1.12]	GO:0045229//external encapsulating structure organization;GO:0009832//plant-type cell wall biogenesis;GO:0009250//glucan biosynthetic process	GO:0016759//cellulose synthase activity;GO:0046914//transition metal ion binding	GO:0031224//intrinsic to membrane
fd_13	GAAC01000010	251	118	55.2652	gi|67003915|gb|AAY60847.1|	166	7e-41	cellulose synthase 5 [Eucalyptus grandis]	sp|Q6AT26|CESA1_ORYSJ	166	5e-41	Probable cellulose synthase A catalytic subunit 1 [UDP-forming] OS=Oryza sativa subsp. japonica GN=CESA1 PE=2 SV=1	--	--	--	--	--	K10999	4e-42	166	zma:542564	cellulose synthase A [EC:2.4.1.12]	GO:0045229//external encapsulating structure organization;GO:0009250//glucan biosynthetic process	GO:0016759//cellulose synthase activity;GO:0046914//transition metal ion binding	GO:0031224//intrinsic to membrane
fd_14	GAAC01000011	217	11	5.959	gi|85068624|gb|ABC69392.1|	72	2e-12	CYP72A55v1 [Nicotiana tabacum]	sp|Q05047|C72A1_CATRO	56.2	6e-08	Secologanin synthase OS=Catharanthus roseus GN=CYP72A1 PE=2 SV=1	--	--	--	--	--	K10717	6e-06	45.8	ath:AT1G67110	cytokinin trans-hydroxylase	-	GO:0046872//metal ion binding	-
fd_15	GAAC01000012	329	48	17.151	gi|270267863|gb|ACZ65511.1|	178	1e-44	Tap46 [Nicotiana benthamiana]	sp|Q8LDQ4|TAP46_ARATH	173	3e-43	PP2A regulatory subunit TAP46 OS=Arabidopsis thaliana GN=TAP46 PE=1 SV=2	--	--	--	--	--	--	--	--	--	--	GO:0006950//response to stress;GO:0007165//signal transduction	GO:0019888//protein phosphatase regulator activity	-
fd_16	GAAC01000013	372	167	52.7736	gi|115466360|ref|NP_001056779.1|	154	1e-59	Os06g0143900 [Oryza sativa Japonica Group] >gi|75109943|sp|Q5VQ78.1|COB21_ORYSJ RecName: Full=Coatomer subunit beta'-1; AltName: Full=Beta'-coat protein 1; Short=Beta'-COP 1 >gi|113594819|dbj|BAF18693.1| Os06g0143900 [Oryza sativa Japonica Group]	sp|Q5VQ78|COB21_ORYSJ	154	6e-60	Coatomer subunit beta'-1 OS=Oryza sativa subsp. japonica GN=Os06g0143900 PE=2 SV=1	--	--	--	--	--	--	--	--	--	--	GO:0015031//protein transport	GO:0004683//calmodulin-dependent protein kinase activity;GO:0005488//binding	GO:0030120//vesicle coat
fd_17	GAAC01000014	372	34	10.7443	gi|297820744|ref|XP_002878255.1|	223	5e-58	protein transporter [Arabidopsis lyrata subsp. lyrata] >gi|297324093|gb|EFH54514.1| protein transporter [Arabidopsis lyrata subsp. lyrata]	sp|O59809|IMA3_SCHPO	75.9	7e-14	Probable importin c550.11 OS=Schizosaccharomyces pombe GN=SPCC550.11 PE=2 SV=1	SPCC550.11	75.9	2e-14	COG5656	Importin, protein involved in nuclear import	--	--	--	--	--	GO:0006606//protein import into nucleus	GO:0022892	GO:0005635//nuclear envelope
fd_18	GAAC01000015	310	231	87.5979	gi|240254512|ref|NP_565540.4|	68.9	2e-11	transferase, transferring glycosyl groups [Arabidopsis thaliana] >gi|15450577|gb|AAK96560.1| At2g22590/T9I22.3 [Arabidopsis thaliana] >gi|17380626|gb|AAL36076.1| At2g22590/T9I22.3 [Arabidopsis thaliana]	--	--	--	--	--	--	--	--	--	K04508	7e-09	55.5	vvi:100256008	transducin (beta)-like 1	-	GO:0016757//transferase activity, transferring glycosyl groups	-
fd_19	GAAC01000016	880	158	21.1066	gi|74476783|gb|ABA08442.1|	469	1e-131	neutral/alkaline invertase [Manihot esculenta]	--	--	--	--	--	--	--	--	--	--	--	--	--	--	-	-	-
fd_20	GAAC01000017	364	100	32.2955	gi|223452393|gb|ACM89524.1|	67.4	5e-11	FERONIA receptor-like kinase [Glycine max]	sp|Q9SCZ4|FERON_ARATH	63.9	3e-10	Receptor-like protein kinase FERONIA OS=Arabidopsis thaliana GN=FER PE=1 SV=1	--	--	--	--	--	K04733	5e-11	62.8	ath:AT5G38990	interleukin-1 receptor-associated kinase 4 [EC:2.7.11.1]	-	GO:0016740//transferase activity	-
fd_21	GAAC01000018	561	108	22.631	gi|238479136|ref|NP_001154480.1|	336	1e-91	protein binding / structural molecule [Arabidopsis thaliana]	sp|Q9CAA0|COB21_ARATH	336	6e-92	Coatomer subunit beta'-1 OS=Arabidopsis thaliana GN=At1g79990 PE=2 SV=2	ECU01g1290	108	7e-24	COG2319	FOG: WD40 repeat	K05236	6e-34	140	sbi:SORBI_01g010390	coatomer protein complex, subunit alpha (xenin)	GO:0015031//protein transport	GO:0005488//binding;GO:0016740//transferase activity	GO:0030120//vesicle coat
fd_22	GAAC01000019	641	145	26.5921	gi|257219572|gb|ACV50439.1|	392	1e-108	ribosomal protein L15 [Jatropha curcas]	sp|O82528|RL15_PETHY	387	2e-107	60S ribosomal protein L15 OS=Petunia hybrida GN=RPL15 PE=2 SV=1	YMR121c	298	6e-81	COG1632	Ribosomal protein L15E	K02877	2e-111	397	pop:POPTR_814568	large subunit ribosomal protein L15e	-	-	-
fd_23	GAAC01000020	216	7	3.8097	gi|158536494|gb|ABW72741.1|	83.6	6e-16	flagellin-sensing 2-like protein [Thlaspi alpestre]	sp|Q9FL28|FLS2_ARATH	75.1	1e-13	LRR receptor-like serine/threonine-protein kinase FLS2 OS=Arabidopsis thaliana GN=FLS2 PE=1 SV=1	--	--	--	--	--	K13420	1e-20	94.4	vvi:100253808	LRR receptor-like serine/threonine-protein kinase FLS2 [EC:2.7.11.1]	-	GO:0016301//kinase activity	GO:0031410//cytoplasmic vesicle
fd_24	GAAC01000021	213	73	40.289	gi|226530896|ref|NP_001149644.1|	121	3e-27	LOC100283270 [Zea mays] >gi|195628780|gb|ACG36220.1| DNL zinc finger family protein [Zea mays]	sp|Q9D113|DNLZ_MOUSE	48.9	9e-06	DNL-type zinc finger protein OS=Mus musculus GN=Dnlz PE=2 SV=1	--	--	--	--	--	--	--	--	--	--	-	-	GO:0009536//plastid
fd_25	GAAC01000022	896	151	19.8113	gi|225435610|ref|XP_002283298.1|	550	1e-156	PREDICTED: similar to Callose synthase 3 [Vitis vinifera]	sp|Q9LXT9|CALS3_ARATH	535	2e-151	Callose synthase 3 OS=Arabidopsis thaliana GN=CALS3 PE=2 SV=2	--	--	--	--	--	K11000	3e-160	561	pop:POPTR_817697	callose synthase [EC:2.4.1.-]	-	-	-
fd_26	GAAC01000023	745	153	24.1423	gi|115444617|ref|NP_001046088.1|	417	1e-116	Os02g0180000 [Oryza sativa Japonica Group] >gi|75290241|sp|Q6ETK3.1|P2C11_ORYSJ RecName: Full=Probable protein phosphatase 2C 11; Short=OsPP2C11 >gi|113535619|dbj|BAF08002.1| Os02g0180000 [Oryza sativa Japonica Group]	sp|Q6ETK3|P2C11_ORYSJ	417	4e-116	Probable protein phosphatase 2C 11 OS=Oryza sativa subsp. japonica GN=Os02g0180000 PE=2 SV=1	SPCC1223.11	194	1e-49	COG0631	Serine/threonine protein phosphatase	K01090	3e-117	417	osa:4328505	protein phosphatase [EC:3.1.3.16]	-	-	-
fd_27	GAAC01000024	551	84	17.9214	gi|115448669|ref|NP_001048114.1|	323	7e-88	Os02g0746000 [Oryza sativa Japonica Group] >gi|113537645|dbj|BAF10028.1| Os02g0746000 [Oryza sativa Japonica Group]	sp|Q54NZ5|CUL3_DICDI	243	5e-64	Cullin-3 OS=Dictyostelium discoideum GN=culC PE=3 SV=1	SPAC24H6.03	119	3e-27	COG5647	Cullin, a subunit of E3 ubiquitin ligase	K03869	2e-92	334	vvi:100254227	cullin 3	GO:0019941//modification-dependent protein catabolic process;GO:0003006//reproductive developmental process	GO:0019899//enzyme binding	GO:0031461//cullin-RING ubiquitin ligase complex
fd_28	GAAC01000025	735	139	22.2316	gi|145337827|ref|NP_178196.2|	97.4	1e-19	binding [Arabidopsis thaliana]	--	--	--	--	--	--	--	--	--	K11267	4e-10	62	ath:AT5G47690	sister chromatid cohesion protein PDS5	-	-	-
fd_29	GAAC01000026	439	32	8.569	gi|49523817|emb|CAF18249.1|	274	3e-73	SEU3A protein [Antirrhinum majus]	sp|Q8W234|SEUSS_ARATH	268	1e-71	Transcriptional corepressor SEUSS OS=Arabidopsis thaliana GN=SEU PE=1 SV=1	--	--	--	--	--	--	--	--	--	--	GO:0048438//floral whorl development	GO:0003676//nucleic acid binding;GO:0046983//protein dimerization activity	GO:0043231//intracellular membrane-bounded organelle
fd_30	GAAC01000027	318	32	11.8295	gi|186496585|ref|NP_178118.2|	118	2e-26	FRS8 (FAR1-related sequence 8); zinc ion binding [Arabidopsis thaliana]	sp|Q9S793|FRS8_ARATH	118	1e-26	Protein FAR1-RELATED SEQUENCE 8 OS=Arabidopsis thaliana GN=FRS8 PE=2 SV=1	--	--	--	--	--	--	--	--	--	--	GO:0009416//response to light stimulus	GO:0046914//transition metal ion binding	-
fd_31	GAAC01000028	2056	431	24.6432	gi|115453435|ref|NP_001050318.1|	520	1e-146	Os03g0401200 [Oryza sativa Japonica Group] >gi|108708671|gb|ABF96466.1| DnaJ domain containing protein, expressed [Oryza sativa (japonica cultivar-group)] >gi|113548789|dbj|BAF12232.1| Os03g0401200 [Oryza sativa Japonica Group]	--	--	--	--	--	--	--	--	--	--	--	--	--	--	-	GO:0005515//protein binding	-
fd_32	GAAC01000029	358	82	26.9261	gi|22212724|gb|AAM94380.1|	161	2e-39	SGT1-like protein [Nicotiana benthamiana]	sp|Q55ED0|SUGT1_DICDI	62	1e-09	Protein SUGT1 homolog OS=Dictyostelium discoideum GN=sugt1 PE=2 SV=1	--	--	--	--	--	K12795	1e-35	144	vvi:100244083	suppressor of G2 allele of SKP1	-	-	-
fd_33	GAAC01000030	337	49	17.0926	--	--	--	--	--	--	--	--	--	--	--	--	--	--	--	--	--	--	-	-	-
fd_34	GAAC01000031	450	91	23.7723	gi|157488004|gb|ABV57768.1|	76.6	9e-14	serine C-palmitoyltransferase [Gossypium hirsutum]	--	--	--	--	--	--	--	--	--	K00654	4e-15	77	rcu:RCOM_1176940	serine palmitoyltransferase [EC:2.3.1.50]	GO:0008152//metabolic process	GO:0016454;GO:0048037//cofactor binding	GO:0031410//cytoplasmic vesicle
fd_35	--	1762	223	14.8779	gi|22328591|ref|NP_193071.2|	177	1e-88	NIG (NSP (NUCLEAR SHUTTLE PROTEIN)-INTERACTING GTPASE); GTP binding / GTPase [Arabidopsis thaliana] >gi|30682446|ref|NP_849540.1| NIG (NSP (NUCLEAR SHUTTLE PROTEIN)-INTERACTING GTPASE); GTP binding / GTPase [Arabidopsis thaliana] >gi|30725432|gb|AAP37738.1| At4g13350 [Arabidopsis thaliana]	sp|Q8RXE7|AGD14_ARATH	171	2e-41	Probable ADP-ribosylation factor GTPase-activating protein AGD14 OS=Arabidopsis thaliana GN=AGD14 PE=1 SV=2	SPCC622.14	57	1e-07	COG5347	GTPase-activating protein that regulates ARFs (ADP-ribosylation factors), involved in ARF-mediated vesicular transport	K12486	8e-11	65.9	vvi:100262374	stromal membrane-associated protein	GO:0009987//cellular process	GO:0005488//binding	-
fd_36	GAAC01000032	269	16	6.9922	--	--	--	--	--	--	--	--	--	--	--	--	--	--	--	--	--	--	-	-	-
fd_37	--	606	40	7.7594	gi|5903043|gb|AAD55602.1|AC008016_12	253	3e-77	Similar to gb|X80301 auxin-independent growth promoter (axi 1) from Nicotiana tabacum. EST gb|AA605466 comes from this gene [Arabidopsis thaliana]	sp|Q8W486|Y1491_ARATH	67	8e-11	DUF246 domain-containing protein At1g04910 OS=Arabidopsis thaliana GN=At1g04910 PE=1 SV=1	--	--	--	--	--	--	--	--	--	--	-	-	GO:0043231//intracellular membrane-bounded organelle
fd_38	GAAC01000033	231	23	11.7047	gi|297813653|ref|XP_002874710.1|	66.2	1e-10	hypothetical protein ARALYDRAFT_327303 [Arabidopsis lyrata subsp. lyrata] >gi|297320547|gb|EFH50969.1| hypothetical protein ARALYDRAFT_327303 [Arabidopsis lyrata subsp. lyrata]	--	--	--	--	--	--	--	--	--	--	--	--	--	--	-	-	-
fd_39	GAAC01000034	889	153	20.2317	gi|15224645|ref|NP_180685.1|	179	3e-44	CDT1A (ARABIDOPSIS HOMOLOG OF YEAST CDT1 A); cyclin-dependent protein kinase/ protein binding [Arabidopsis thaliana]	sp|Q9H211|CDT1_HUMAN	55.5	5e-07	DNA replication factor Cdt1 OS=Homo sapiens GN=CDT1 PE=1 SV=2	--	--	--	--	--	K10727	4e-38	155	ath:AT3G54710	chromatin licensing and DNA replication factor 1	GO:0006259//DNA metabolic process;GO:0009657//plastid organization	-	GO:0043231//intracellular membrane-bounded organelle
fd_40	GAAC01000035	442	34	9.0427	gi|30695792|ref|NP_175866.2|	166	1e-40	methyltransferase [Arabidopsis thaliana] >gi|56550685|gb|AAV97796.1| At1g54650 [Arabidopsis thaliana]	sp|Q8T199|OMT3_DICDI	91.3	2e-18	O-methyltransferase 3 OS=Dictyostelium discoideum GN=omt3 PE=2 SV=1	--	--	--	--	--	--	--	--	--	--	-	GO:0016741//transferase activity, transferring one-carbon groups	-
fd_41	GAAC01000036	1265	127	11.802	gi|18403609|ref|NP_566721.1|	525	1e-148	LFR (LEAF AND FLOWER RELATED); binding [Arabidopsis thaliana]	--	--	--	--	--	--	--	--	--	--	--	--	--	--	-	-	-
fd_42	GAAC01000037	1159	268	27.1828	gi|15241528|ref|NP_196427.1|	497	1e-139	L-asparaginase / L-asparagine amidohydrolase [Arabidopsis thaliana] >gi|25108880|sp|P50287.2|ASPG1_ARATH RecName: Full=Isoaspartyl peptidase/L-asparaginase 1; AltName: Full=L-asparagine amidohydrolase 1; Contains: RecName: Full=Isoaspartyl peptidase/L-asparaginase 1 subunit alpha; Contains: RecName: Full=Isoaspartyl peptidase/L-asparaginase 1 subunit beta; Flags: Precursor >gi|8346547|emb|CAB9371…	sp|P50287|ASPG1_ARATH	497	7e-140	Isoaspartyl peptidase/L-asparaginase 1 OS=Arabidopsis thaliana GN=At5g08100 PE=1 SV=2	ybiK	242	8e-64	COG1446	Asparaginase	K13051	3e-154	541	vvi:100250923	beta-aspartyl-peptidase (threonine type) [EC:3.4.19.5]	-	-	-
fd_43	--	187	565	355.181	gi|226491888|ref|NP_001147252.1|	120	4e-27	ras-related protein Rab11C [Zea mays] >gi|195609118|gb|ACG26389.1| ras-related protein Rab11C [Zea mays]	sp|O04486|RAA2A_ARATH	120	2e-27	Ras-related protein RABA2a OS=Arabidopsis thaliana GN=RABA2A PE=2 SV=1	YER031c	103	1e-22	COG1100	GTPase SAR1 and related small G proteins	K07904	1e-28	120	vvi:100259150	Ras-related protein Rab-11A	GO:0051169//nuclear transport;GO:0051301//cell division;GO:0015031//protein transport	GO:0032561//guanyl ribonucleotide binding;GO:0003824//catalytic activity	GO:0043231//intracellular membrane-bounded organelle;GO:0044444//cytoplasmic part;GO:0016020//membrane
fd_44	GAAC01000038	317	73	27.0712	gi|4091008|gb|AAC99620.1|	162	1e-39	methionyl-tRNA synthetase [Oryza sativa]	sp|Q9ZTS1|SYM_ORYSJ	160	2e-39	Probable methionyl-tRNA synthetase OS=Oryza sativa subsp. japonica GN=Os06g0508700 PE=2 SV=2	SPBC17A3.04c	77.8	4e-15	COG0143	Methionyl-tRNA synthetase	K01874	3e-42	166	pop:POPTR_297902	methionyl-tRNA synthetase [EC:6.1.1.10]	GO:0006418//tRNA aminoacylation for protein translation;GO:0010038//response to metal ion	GO:0004812//aminoacyl-tRNA ligase activity;GO:0003723//RNA binding;GO:0032559//adenyl ribonucleotide binding	GO:0044444//cytoplasmic part
fd_45	--	164	28	20.0705	gi|2492953|sp|Q42885.1|AROC2_SOLLC	103	6e-22	RecName: Full=Chorismate synthase 2, chloroplastic; AltName: Full=5-enolpyruvylshikimate-3-phosphate phospholyase 2; Flags: Precursor >gi|410484|emb|CAA79854.1| chorismate synthase 2 [Solanum lycopersicum]	sp|Q42885|AROC2_SOLLC	103	3e-22	Chorismate synthase 2, chloroplastic OS=Solanum lycopersicum GN=CS2 PE=2 SV=1	sll1747	80.1	9e-16	COG0082	Chorismate synthase	K01736	4e-23	102	rcu:RCOM_0228160	chorismate synthase [EC:4.2.3.5]	GO:0008652//cellular amino acid biosynthetic process;GO:0003006//reproductive developmental process	GO:0016838//carbon-oxygen lyase activity, acting on phosphates	GO:0031981//nuclear lumen;GO:0009536//plastid
fd_46	GAAC01000039	204	7	4.0338	--	--	--	--	--	--	--	--	--	--	--	--	--	--	--	--	--	--	-	-	-
fd_47	GAAC01000040	1017	180	20.8063	gi|115455985|ref|NP_001051593.1|	443	1e-167	Os03g0801600 [Oryza sativa Japonica Group] >gi|113550064|dbj|BAF13507.1| Os03g0801600 [Oryza sativa Japonica Group]	sp|Q54C24|VPS35_DICDI	288	4e-98	Vacuolar sorting protein 35 OS=Dictyostelium discoideum GN=vps35 PE=3 SV=1	--	--	--	--	--	--	--	--	--	--	-	-	-
fd_48	GAAC01000041	270	24	10.4494	gi|226499178|ref|NP_001151791.1|	51.6	3e-06	PIF-like orf1 [Zea mays] >gi|195649705|gb|ACG44320.1| PIF-like orf1 [Zea mays]	--	--	--	--	--	--	--	--	--	--	--	--	--	--	-	-	-
fd_49	GAAC01000042	416	71	20.0636	gi|225463384|ref|XP_002271705.1|	91.3	3e-18	PREDICTED: hypothetical protein [Vitis vinifera]	--	--	--	--	--	--	--	--	--	--	--	--	--	--	-	GO:0042578//phosphoric ester hydrolase activity	-
fd_50	--	168	48	33.5873	gi|300160912|gb|EFJ27529.1|	95.9	1e-19	ubiquitin-conjugating enzyme 28, E2 [Selaginella moellendorffii] >gi|300168694|gb|EFJ35297.1| ubiquitin-conjugating enzyme 28, E2 [Selaginella moellendorffii]	sp|P35132|UBC9_ARATH	91.7	1e-18	SUMO-conjugating enzyme UBC9 OS=Arabidopsis thaliana GN=UBC9 PE=1 SV=1	SPBC119.02	81.6	3e-16	COG5078	Ubiquitin-protein ligase	K06689	5e-21	95.9	ppp:PHYPADRAFT_164116	ubiquitin-conjugating enzyme E2 D/E [EC:6.3.2.19]	GO:0060255;GO:0006464//protein modification process	GO:0019787//small conjugating protein ligase activity	-
fd_51	--	194	7	4.2417	gi|13492674|gb|AAK28303.1|AF346431_1	98.2	3e-20	phenylpropanoid:glucosyltransferase 1 [Nicotiana tabacum]	sp|Q8H0F2|ANGT_GENTR	95.5	9e-20	Anthocyanin 3'-O-beta-glucosyltransferase OS=Gentiana triflora PE=1 SV=1	--	--	--	--	--	K13496	7e-15	75.5	ath:AT3G53160	UDP-glucosyl transferase 73C [EC:2.4.1.-]	-	GO:0035251//UDP-glucosyltransferase activity	-
fd_52	GAAC01000043	466	98	24.722	gi|62241065|dbj|BAD93689.1|	199	1e-50	glycosyltransferase [Nicotiana tabacum]	sp|Q9SK82|COGT2_ARATH	168	1e-41	Cytokinin-O-glucosyltransferase 2 OS=Arabidopsis thaliana GN=UGT85A1 PE=1 SV=1	--	--	--	--	--	K13030	1e-25	112	sbi:SORBI_01g001220	cyanohydrin beta-glucosyltransferase [EC:2.4.1.85]	-	GO:0016758//transferase activity, transferring hexosyl groups	-
fd_53	GAAC01000044	411	61	17.4474	--	--	--	--	--	--	--	--	--	--	--	--	--	--	--	--	--	--	-	-	-
fd_54	GAAC01000045	305	187	72.075	gi|15225633|ref|NP_181541.1|	183	6e-46	protein kinase family protein [Arabidopsis thaliana]	sp|Q5U4C9|DYRK2_MOUSE	90.1	4e-18	Dual specificity tyrosine-phosphorylation-regulated kinase 2 OS=Mus musculus GN=Dyrk2 PE=2 SV=1	ECU02g0550	47.4	7e-06	COG0515	Serine/threonine protein kinase	K08825	7e-17	82	cre:CHLREDRAFT_130269	dual-specificity tyrosine-(Y)-phosphorylation regulated kinase [EC:2.7.12.1]	GO:0006464//protein modification process	GO:0004672//protein kinase activity;GO:0032559//adenyl ribonucleotide binding	GO:0044424//intracellular part
fd_55	GAAC01000046	416	93	26.2804	--	--	--	--	--	--	--	--	--	--	--	--	--	--	--	--	--	--	-	-	-
fd_56	GAAC01000047	209	4	2.2499	--	--	--	--	--	--	--	--	--	--	--	--	--	--	--	--	--	--	-	-	-
fd_57	GAAC01000048	606	83	16.1008	gi|300433285|gb|ADK13088.1|	313	9e-85	hydroxyacylglutathione hydrolase [Polygonum sibiricum]	sp|Q9C8L4|GLO2O_ARATH	306	5e-83	Hydroxyacylglutathione hydrolase 3, mitochondrial OS=Arabidopsis thaliana GN=GLY3 PE=1 SV=2	alr3904	142	4e-34	COG0491	Zn-dependent hydrolases, including glyoxylases	K01069	9e-11	63.5	osa:4332736	hydroxyacylglutathione hydrolase [EC:3.1.2.6]	-	GO:0016790//thiolester hydrolase activity	GO:0043231//intracellular membrane-bounded organelle
fd_58	--	173	54	36.6936	gi|1335862|gb|AAC49294.1|	121	2e-27	clathrin heavy chain [Glycine max]	sp|P34574|CLH_CAEEL	82.8	6e-16	Probable clathrin heavy chain 1 OS=Caenorhabditis elegans GN=chc-1 PE=1 SV=1	--	--	--	--	--	K04646	8e-29	121	vvi:100256972	clathrin, heavy polypeptide	GO:0015031//protein transport	GO:0005488//binding	GO:0012510//trans-Golgi network transport vesicle membrane;GO:0009536//plastid;GO:0005905//coated pit
fd_59	GAAC01000049	1174	225	22.5298	gi|297802570|ref|XP_002869169.1|	356	4e-97	vacuolar ATP synthase subunit H family protein [Arabidopsis lyrata subsp. lyrata] >gi|297315005|gb|EFH45428.1| vacuolar ATP synthase subunit H family protein [Arabidopsis lyrata subsp. lyrata]	sp|Q9LX65|VATH_ARATH	353	2e-96	V-type proton ATPase subunit H OS=Arabidopsis thaliana GN=VHA-H PE=2 SV=1	SPAC7D4.10	128	2e-29	COG5231	Vacuolar H+-ATPase V1 sector, subunit H	K02144	1e-103	373	pop:POPTR_823751	V-type H+-transporting ATPase 54 kD subunit [EC:3.6.3.14]	GO:0006754//ATP biosynthetic process	GO:0015662//ATPase activity, coupled to transmembrane movement of ions, phosphorylative mechanism;GO:0019829//cation-transporting ATPase activity;GO:0005506//iron ion binding	GO:0016471//vacuolar proton-transporting V-type ATPase complex;GO:0009536//plastid
fd_60	GAAC01000050	235	909	454.715	gi|115471321|ref|NP_001059259.1|	156	8e-38	Os07g0239400 [Oryza sativa Japonica Group] >gi|113610795|dbj|BAF21173.1| Os07g0239400 [Oryza sativa Japonica Group]	sp|Q39433|RB1BV_BETVU	154	2e-37	Ras-related protein RAB1BV OS=Beta vulgaris GN=RAB1BV PE=2 SV=1	SPAC18G6.03	57.4	6e-09	COG1100	GTPase SAR1 and related small G proteins	K07901	7e-39	155	osa:4339021	Ras-related protein Rab-8A	GO:0006810//transport	GO:0032561//guanyl ribonucleotide binding;GO:0003824//catalytic activity	-
fd_61	GAAC01000051	287	5	2.048	gi|301602317|gb|ADK79068.1|	168	1e-41	MYB2 [Vaccinium myrtillus]	sp|P27898|MYBP_MAIZE	137	2e-32	Myb-related protein P OS=Zea mays GN=P PE=2 SV=1	ECU11g1690	54.3	5e-08	COG5147	Myb superfamily proteins, including transcription factors and mRNA splicing factors	K09422	6e-35	142	ath:AT5G49330	myb proto-oncogene protein, plant	GO:0010468//regulation of gene expression	GO:0003676//nucleic acid binding	GO:0043231//intracellular membrane-bounded organelle
fd_62	GAAC01000052	1142	251	25.8375	gi|224132090|ref|XP_002321253.1|	566	1e-160	multidrug resistance protein ABC transporter family [Populus trichocarpa] >gi|222862026|gb|EEE99568.1| multidrug resistance protein ABC transporter family [Populus trichocarpa]	sp|Q9M1C7|AB9C_ARATH	518	4e-146	ABC transporter C family member 9 OS=Arabidopsis thaliana GN=ABCC9 PE=2 SV=1	YDR135c	222	8e-58	COG1132	ABC-type multidrug transport system, ATPase and permease components	K05666	6e-53	204	olu:OSTLU_35503	ATP-binding cassette, subfamily C (CFTR/MRP), member 2	-	-	-
fd_63	--	823	95	13.5696	gi|224109958|ref|XP_002315369.1|	105	7e-22	f-box family protein [Populus trichocarpa] >gi|222864409|gb|EEF01540.1| f-box family protein [Populus trichocarpa]	sp|Q9FLS0|FB253_ARATH	95.5	4e-19	F-box protein At5g07610 OS=Arabidopsis thaliana GN=At5g07610 PE=2 SV=1	--	--	--	--	--	--	--	--	--	--	-	-	-
fd_64	GAAC01000053	362	19	6.17	gi|145332685|ref|NP_001078208.1|	218	2e-56	protein kinase family protein [Arabidopsis thaliana]	sp|Q5RKH1|PRP4B_RAT	149	4e-36	Serine/threonine-protein kinase PRP4 homolog OS=Rattus norvegicus GN=Prpf4b PE=2 SV=1	SPAC1687.15	50.4	8e-07	COG0515	Serine/threonine protein kinase	K08827	9e-63	234	vvi:100247382	serine/threonine-protein kinase PRP4 [EC:2.7.11.1]	GO:0006464//protein modification process	GO:0004672//protein kinase activity;GO:0032559//adenyl ribonucleotide binding	GO:0043231//intracellular membrane-bounded organelle
fd_65	--	160	2	1.4694	--	--	--	--	--	--	--	--	--	--	--	--	--	--	--	--	--	--	-	-	-
fd_66	GAAC01000054	253	30	13.9394	gi|144923530|gb|ABE80159.2|	59.7	1e-08	Tetratricopeptide-like helical [Medicago truncatula]	sp|Q9SH26|PP102_ARATH	56.2	6e-08	Pentatricopeptide repeat-containing protein At1g63400 OS=Arabidopsis thaliana GN=At1g63400 PE=2 SV=1	--	--	--	--	--	--	--	--	--	--	-	-	-
fd_67	GAAC01000055	272	16	6.915	--	--	--	--	--	--	--	--	--	--	--	--	--	--	--	--	--	--	-	-	-
fd_68	GAAC01000056	461	68	17.3401	gi|297838233|ref|XP_002886998.1|	58.9	2e-08	expressed protein [Arabidopsis lyrata subsp. lyrata] >gi|297332839|gb|EFH63257.1| expressed protein [Arabidopsis lyrata subsp. lyrata]	sp|Q54EF7|Y5454_DICDI	50.1	6e-06	Uncharacterized transmembrane protein DDB_G0291640 OS=Dictyostelium discoideum GN=DDB_G0291640 PE=4 SV=1	--	--	--	--	--	--	--	--	--	--	-	-	-
fd_69	GAAC01000057	219	10	5.3678	--	--	--	--	--	--	--	--	--	--	--	--	--	--	--	--	--	--	-	-	-
fd_70	GAAC01000058	339	83	28.782	--	--	--	--	--	--	--	--	--	--	--	--	--	--	--	--	--	--	-	-	-
fd_71	--	1617	306	22.2461	gi|2150027|gb|AAB58727.1|	484	0	NADP-malic enzyme [Solanum lycopersicum]	sp|P36444|MAOC_FLAPR	469	0	NADP-dependent malic enzyme, chloroplastic OS=Flaveria pringlei GN=MODA PE=2 SV=1	ZsfcA	266	2e-108	COG0281	Malic enzyme	K00029	0	474	vvi:100233075	malate dehydrogenase (oxaloacetate-decarboxylating)(NADP+) [EC:1.1.1.40]	GO:0043648//dicarboxylic acid metabolic process	GO:0043169//cation binding;GO:0004470//malic enzyme activity;GO:0000166//nucleotide binding	GO:0009536//plastid
fd_72	GAAC01000059	382	113	34.7743	gi|226532188|ref|NP_001149384.1|	105	2e-22	coatomer subunit delta [Zea mays] >gi|195626842|gb|ACG35251.1| coatomer subunit delta [Zea mays]	sp|Q93Y22|COPD_ARATH	103	4e-22	Coatomer subunit delta OS=Arabidopsis thaliana GN=At5g05010 PE=1 SV=2	--	--	--	--	--	--	--	--	--	--	GO:0015031//protein transport	GO:0005488//binding	GO:0030119//AP-type membrane coat adaptor complex
fd_73	GAAC01000060	1145	212	21.7657	gi|73587486|emb|CAJ27525.1|	633	1e-180	beclin 1 protein [Vitis vinifera]	sp|Q9M367|BECN1_ARATH	509	1e-143	Beclin-1-like protein OS=Arabidopsis thaliana GN=At3g61710 PE=2 SV=2	--	--	--	--	--	K08334	0	633	vvi:100232897	beclin 1	-	-	-
fd_74	--	192	117	71.6354	gi|224813796|gb|ACN65116.1|	122	2e-27	2-alkenal reductase [Artemisia annua]	sp|Q39173|P2_ARATH	118	1e-26	Probable NADP-dependent oxidoreductase P2 OS=Arabidopsis thaliana GN=P2 PE=2 SV=2	VNG0815G	77.8	4e-15	COG2130	Putative NADP-dependent oxidoreductases	K08070	9e-28	118	ath:AT5G16990	2-alkenal reductase [EC:1.3.1.74]	GO:0008152//metabolic process	GO:0016628//oxidoreductase activity, acting on the CH-CH group of donors, NAD or NADP as acceptor;GO:0046914//transition metal ion binding	-
fd_75	GAAC01000061	874	1052	141.497	gi|164604984|dbj|BAF98288.1|	547	1e-155	1-deoxy-D-xylulose 5-phosphate synthase [Hevea brasiliensis]	sp|O78328|DXS_CAPAN	544	3e-154	Probable 1-deoxy-D-xylulose-5-phosphate synthase, chloroplastic OS=Capsicum annuum GN=TKT2 PE=2 SV=1	mlr7474	328	1e-89	COG1154	Deoxyxylulose-5-phosphate synthase	K01662	6e-157	550	vvi:100249323	1-deoxy-D-xylulose-5-phosphate synthase [EC:2.2.1.7]	-	-	-
fd_76	GAAC01000062	251	6	2.8101	gi|224065200|ref|XP_002301713.1|	62	2e-09	nbs-lrr resistance protein [Populus trichocarpa] >gi|222843439|gb|EEE80986.1| nbs-lrr resistance protein [Populus trichocarpa]	sp|Q7XBQ9|RGA2_SOLBU	51.2	2e-06	Disease resistance protein RGA2 OS=Solanum bulbocastanum GN=RGA2 PE=1 SV=1	--	--	--	--	--	--	--	--	--	--	-	GO:0005488//binding	-
fd_77	GAAC01000063	291	45	18.1787	--	--	--	--	--	--	--	--	--	--	--	--	--	--	--	--	--	--	-	-	-
fd_78	GAAC01000064	331	27	9.5891	gi|87162824|gb|ABD28619.1|	115	2e-25	Endonuclease/exonuclease/phosphatase [Medicago truncatula]	sp|O02751|CFDP2_BOVIN	49.3	7e-06	Craniofacial development protein 2 OS=Bos taurus GN=CFDP2 PE=1 SV=2	--	--	--	--	--	--	--	--	--	--	-	-	-
fd_79	GAAC01000065	348	26	8.7829	gi|115459268|ref|NP_001053234.1|	60.8	4e-09	Os04g0502200 [Oryza sativa Japonica Group] >gi|113564805|dbj|BAF15148.1| Os04g0502200 [Oryza sativa Japonica Group]	--	--	--	--	--	--	--	--	--	--	--	--	--	--	-	-	-
fd_80	GAAC01000066	357	121	39.8438	gi|15227773|ref|NP_179884.1|	99.4	1e-20	serine carboxypeptidase S10 family protein [Arabidopsis thaliana] >gi|75099209|sp|O64811.1|SCP9_ARATH RecName: Full=Serine carboxypeptidase-like 9; Flags: Precursor	sp|O64811|SCP9_ARATH	99.4	6e-21	Serine carboxypeptidase-like 9 OS=Arabidopsis thaliana GN=SCPL9 PE=2 SV=1	SPAC19G12.10c_2	53.9	7e-08	COG2939	Carboxypeptidase C (cathepsin A)	K01289	2e-19	90.9	ath:AT5G09640	carboxypeptidase [EC:3.4.16.-]	GO:0019538//protein metabolic process	GO:0016747//transferase activity, transferring acyl groups other than amino-acyl groups;GO:0004180//carboxypeptidase activity	-
fd_81	GAAC01000067	515	57	13.011	gi|240255737|ref|NP_680572.4|	236	1e-61	catalytic/ protein serine/threonine phosphatase [Arabidopsis thaliana] >gi|75151368|sp|Q8GY60.1|P2C52_ARATH RecName: Full=Probable protein phosphatase 2C 52; Short=AtPP2C52 >gi|28951049|gb|AAO63448.1| At4g03415 [Arabidopsis thaliana]	sp|Q8GY60|P2C52_ARATH	236	7e-62	Probable protein phosphatase 2C 52 OS=Arabidopsis thaliana GN=At4g03415 PE=2 SV=1	--	--	--	--	--	--	--	--	--	--	-	GO:0004721//phosphoprotein phosphatase activity	GO:0016020//membrane
fd_82	GAAC01000068	286	13	5.3434	gi|255572032|ref|XP_002526957.1|	51.2	3e-06	Protein bem46, putative [Ricinus communis] >gi|223533709|gb|EEF35444.1| Protein bem46, putative [Ricinus communis]	--	--	--	--	--	--	--	--	--	--	--	--	--	--	-	-	-
fd_83	GAAC01000069	1145	176	18.0697	gi|40645459|dbj|BAD06575.1|	582	1e-165	LEDI-5c protein [Lithospermum erythrorhizon]	sp|Q8GYB8|OPR2_ARATH	553	6e-157	12-oxophytodienoate reductase 2 OS=Arabidopsis thaliana GN=OPR2 PE=2 SV=2	all1865	295	8e-80	COG1902	NADH:flavin oxidoreductases, Old Yellow Enzyme family	K05894	6e-158	553	ath:AT1G76690	12-oxophytodienoic acid reductase [EC:1.3.1.42]	-	-	-
fd_84	GAAC01000070	352	75	25.0473	gi|115440237|ref|NP_001044398.1|	138	2e-32	Os01g0773100 [Oryza sativa Japonica Group] >gi|113533929|dbj|BAF06312.1| Os01g0773100 [Oryza sativa Japonica Group]	sp|Q293C2|DYM_DROPS	64.7	2e-10	Dymeclin OS=Drosophila pseudoobscura pseudoobscura GN=GA20914 PE=3 SV=1	--	--	--	--	--	--	--	--	--	--	-	-	-
fd_85	GAAC01000071	275	115	49.1596	gi|192910848|gb|ACF06532.1|	81.3	3e-15	thioredoxin peroxidase [Elaeis guineensis]	sp|O24364|BAS1_SPIOL	68.9	9e-12	2-Cys peroxiredoxin BAS1, chloroplastic OS=Spinacia oleracea GN=BAS1 PE=2 SV=1	--	--	--	--	--	K03386	6e-13	68.9	ath:AT3G11630	peroxiredoxin (alkyl hydroperoxide reductase subunit C) [EC:1.11.1.15]	GO:0006952//defense response	GO:0016209//antioxidant activity;GO:0005488//binding;GO:0016705//oxidoreductase activity, acting on paired donors, with incorporation or reduction of molecular oxygen	GO:0009526//plastid envelope;GO:0009532//plastid stroma;GO:0005576//extracellular region
fd_86	GAAC01000072	237	44	21.8247	gi|18421489|ref|NP_568530.1|	145	2e-34	EXS family protein / ERD1/XPR1/SYG1 family protein [Arabidopsis thaliana]	--	--	--	--	--	--	--	--	--	--	--	--	--	--	-	-	GO:0031224//intrinsic to membrane;GO:0031410//cytoplasmic vesicle
fd_87	GAAC01000073	204	8	4.61	--	--	--	--	--	--	--	--	--	--	--	--	--	--	--	--	--	--	-	-	-
fd_88	GAAC01000074	255	10	4.61	--	--	--	--	--	--	--	--	--	--	--	--	--	--	--	--	--	--	-	-	-
fd_89	GAAC01000075	1019	215	24.8032	gi|18076148|emb|CAC80702.1|	485	1e-136	N-acetylglucosaminyltransferase I [Nicotiana tabacum]	sp|Q9XGM8|MGAT1_ARATH	449	1e-125	Alpha-1,3-mannosyl-glycoprotein 2-beta-N-acetylglucosaminyltransferase OS=Arabidopsis thaliana GN=GNTI PE=1 SV=1	--	--	--	--	--	K00726	6e-132	467	pop:POPTR_1085909	alpha-1,3-mannosyl-glycoprotein beta-1,2-N-acetylglucosaminyltransferase [EC:2.4.1.101]	-	-	-
fd_90	--	165	6	4.2747	--	--	--	--	--	--	--	--	--	--	--	--	--	--	--	--	--	--	-	-	-
fd_91	GAAC01000076	816	85	12.2454	gi|225442633|ref|XP_002284593.1|	275	1e-119	PREDICTED: similar to BY-2 kinesin-like protein 10 [Vitis vinifera]	sp|Q6S004|KIF6_DICDI	126	3e-50	Kinesin-related protein 6 OS=Dictyostelium discoideum GN=kif6 PE=2 SV=1	ECU11g0470	107	3e-23	COG5059	Kinesin-like protein	K10393	1e-120	274	rcu:RCOM_1494510	kinesin family member 2/24	GO:0007017//microtubule-based process	GO:0003774//motor activity;GO:0032559//adenyl ribonucleotide binding	GO:0015630//microtubule cytoskeleton
fd_92	GAAC01000077	221	11	5.8512	gi|297815076|ref|XP_002875421.1|	79.3	1e-14	nodulin MtN21 family protein [Arabidopsis lyrata subsp. lyrata] >gi|297321259|gb|EFH51680.1| nodulin MtN21 family protein [Arabidopsis lyrata subsp. lyrata]	sp|Q6J163|5NG4_PINTA	67.4	3e-11	Auxin-induced protein 5NG4 OS=Pinus taeda PE=2 SV=1	--	--	--	--	--	--	--	--	--	--	-	-	GO:0044464//cell part
fd_93	GAAC01000078	333	40	14.1208	gi|89473698|gb|ABD72661.1|	126	7e-29	pollen tube RhoGDI2 [Nicotiana tabacum]	sp|Q9SFC6|GDIR_ARATH	122	9e-28	Rho GDP-dissociation inhibitor 1 OS=Arabidopsis thaliana GN=GDI1 PE=1 SV=1	--	--	--	--	--	K12462	1e-30	127	pop:POPTR_246928	Rho GDP-dissociation inhibitor	-	GO:0005488//binding;GO:0005092//GDP-dissociation inhibitor activity	GO:0044424//intracellular part
fd_94	GAAC01000079	342	73	25.0923	gi|89953439|gb|ABD83313.1|	87.8	3e-17	Fgenesh protein 60 [Beta vulgaris]	sp|Q9SD53|Y3720_ARATH	55.5	1e-07	UPF0481 protein At3g47200 OS=Arabidopsis thaliana GN=At3g47200 PE=1 SV=1	--	--	--	--	--	--	--	--	--	--	-	-	-
fd_95	GAAC01000080	426	180	49.6714	gi|15233161|ref|NP_191061.1|	110	4e-24	PUR5; ATP binding / phosphoribosylformylglycinamidine cyclo-ligase [Arabidopsis thaliana] >gi|42572683|ref|NP_974437.1| PUR5; ATP binding / phosphoribosylformylglycinamidine cyclo-ligase [Arabidopsis thaliana] >gi|21264504|sp|Q05728.2|PUR5_ARATH RecName: Full=Phosphoribosylformylglycinamidine cyclo-ligase, chloroplastic; AltName: Full=Phosphoribosyl-aminoimidazole synthetase; AltName: Full=AIR sy…	sp|Q05728|PUR5_ARATH	110	2e-24	Phosphoribosylformylglycinamidine cyclo-ligase, chloroplastic OS=Arabidopsis thaliana GN=PUR5 PE=2 SV=2	SPBC405.01_2	67.4	8e-12	COG0150	Phosphoribosylaminoimidazole (AIR) synthetase	K01933	1e-28	121	vvi:100267493	phosphoribosylformylglycinamidine cyclo-ligase [EC:6.3.3.1]	GO:0006188//IMP biosynthetic process	GO:0016882//cyclo-ligase activity;GO:0046914//transition metal ion binding;GO:0032559//adenyl ribonucleotide binding	GO:0009536//plastid
fd_96	GAAC01000081	254	170	78.6789	gi|1710008|sp|P54766.1|RAN1B_LOTJA	169	7e-42	RecName: Full=GTP-binding nuclear protein Ran1B >gi|1370205|emb|CAA98188.1| RAN1B [Lotus japonicus]	sp|P41918|RANA1_TOBAC	169	4e-42	GTP-binding nuclear protein Ran-A1 OS=Nicotiana tabacum GN=RAN-A1 PE=2 SV=1	ECU04g1560	66.2	1e-11	COG1100	GTPase SAR1 and related small G proteins	K07936	1e-42	167	vvi:100247365	GTP-binding nuclear protein Ran	GO:0051169//nuclear transport;GO:0006605//protein targeting	GO:0032561//guanyl ribonucleotide binding;GO:0017111//nucleoside-triphosphatase activity	GO:0043231//intracellular membrane-bounded organelle
fd_97	GAAC01000082	287	37	15.1552	--	--	--	--	--	--	--	--	--	--	--	--	--	--	--	--	--	--	-	-	-
fd_98	GAAC01000083	1136	239	24.7322	gi|29373073|gb|AAO72532.1|	715	0	aldehyde dehydrogenase 1 precursor [Lotus corniculatus]	sp|Q9SU63|AL2B4_ARATH	667	0	Aldehyde dehydrogenase family 2 member B4, mitochondrial OS=Arabidopsis thaliana GN=ALDH2B4 PE=1 SV=1	BH0539	391	1e-108	COG1012	NAD-dependent aldehyde dehydrogenases	K00128	0	667	ath:AT3G48000	aldehyde dehydrogenase (NAD+) [EC:1.2.1.3]	GO:0008152//metabolic process;GO:0010038//response to metal ion	GO:0004030//aldehyde dehydrogenase [NAD(P)+] activity;GO:0032559//adenyl ribonucleotide binding	GO:0009536//plastid
fd_99	GAAC01000084	205	5	2.8672	gi|1351887|sp|P48977.1|ADH_MALDO	137	5e-32	RecName: Full=Alcohol dehydrogenase >gi|886885|emb|CAA88271.1| alcohol dehydrogenase [Malus x domestica]	sp|P48977|ADH_MALDO	137	3e-32	Alcohol dehydrogenase OS=Malus domestica GN=ADH PE=2 SV=1	SMc01270	57.4	6e-09	COG1062	Zn-dependent alcohol dehydrogenases, class III	K00001	9e-31	128	ath:AT1G77120	alcohol dehydrogenase [EC:1.1.1.1]	GO:0008152//metabolic process	GO:0046914//transition metal ion binding;GO:0016616//oxidoreductase activity, acting on the CH-OH group of donors, NAD or NADP as acceptor	GO:0044424//intracellular part
fd_100	GAAC01000085	1666	443	31.2588	gi|225435610|ref|XP_002283298.1|	970	0	PREDICTED: similar to Callose synthase 3 [Vitis vinifera]	sp|Q9SL03|CALS2_ARATH	960	0	Callose synthase 2 OS=Arabidopsis thaliana GN=CALS2 PE=2 SV=2	--	--	--	--	--	K11000	0	981	pop:POPTR_817697	callose synthase [EC:2.4.1.-]	GO:0006074	GO:0035251//UDP-glucosyltransferase activity	GO:0043234//protein complex;GO:0016020//membrane
fd_101	--	387	9	2.7339	gi|16226251|gb|AAL16115.1|AF428283_1	76.6	8e-14	AT4g14500/dl3290w [Arabidopsis thaliana] >gi|22531042|gb|AAM97025.1| expressed protein [Arabidopsis thaliana] >gi|31376367|gb|AAP49510.1| At4g14500 [Arabidopsis thaliana]	--	--	--	--	--	--	--	--	--	--	--	--	--	--	-	-	-
fd_102	--	190	10	6.1871	gi|296082300|emb|CBI21305.3|	62.8	1e-09	unnamed protein product [Vitis vinifera]	--	--	--	--	--	--	--	--	--	--	--	--	--	--	-	-	-
fd_103	GAAC01000086	634	74	13.721	gi|40644190|emb|CAC95126.1|	71.2	1e-25	gag-pol polyprotein [Populus deltoides]	sp|P10978|POLX_TOBAC	51.2	5e-06	Retrovirus-related Pol polyprotein from transposon TNT 1-94 OS=Nicotiana tabacum PE=2 SV=1	--	--	--	--	--	--	--	--	--	--	GO:0006259//DNA metabolic process	GO:0046914//transition metal ion binding;GO:0003676//nucleic acid binding	-
fd_104	GAAC01000087	490	50	11.9955	gi|224138292|ref|XP_002326566.1|	190	7e-48	nbs-lrr resistance protein [Populus trichocarpa] >gi|222833888|gb|EEE72365.1| nbs-lrr resistance protein [Populus trichocarpa]	sp|Q39214|RPM1_ARATH	111	2e-24	Disease resistance protein RPM1 OS=Arabidopsis thaliana GN=RPM1 PE=1 SV=1	--	--	--	--	--	K13457	5e-33	136	pop:POPTR_755797	disease resistance protein RPM1	-	GO:0000166//nucleotide binding	-
fd_105	GAAC01000088	238	134	66.1867	gi|30409730|dbj|BAC76395.1|	73.6	7e-13	RAD23-like protein [Arabidopsis thaliana]	sp|Q40742|RAD23_ORYSJ	65.9	8e-11	Probable DNA repair protein RAD23 OS=Oryza sativa subsp. japonica GN=RAD23 PE=1 SV=2	SPBC2D10.12	54.3	5e-08	COG5272	Ubiquitin	K10839	2e-14	73.9	vvi:100245820	UV excision repair protein RAD23	GO:0006511//ubiquitin-dependent protein catabolic process;GO:0006281//DNA repair	GO:0003677//DNA binding	GO:0043231//intracellular membrane-bounded organelle
fd_106	GAAC01000089	253	70	32.5253	--	--	--	--	--	--	--	--	--	--	--	--	--	--	--	--	--	--	-	-	-
fd_107	GAAC01000090	453	25	6.4876	gi|115481768|ref|NP_001064477.1|	175	3e-62	Os10g0377800 [Oryza sativa Japonica Group] >gi|113639086|dbj|BAF26391.1| Os10g0377800 [Oryza sativa Japonica Group]	sp|B1WR90|PDXH_CYAA5	91.7	2e-18	Pyridoxine/pyridoxamine 5'-phosphate oxidase OS=Cyanothece sp. (strain ATCC 51142) GN=pdxH PE=3 SV=1	sll1440	87	1e-17	COG0259	Pyridoxamine-phosphate oxidase	--	--	--	--	--	GO:0008614//pyridoxine metabolic process;GO:0006081//cellular aldehyde metabolic process	GO:0016641//oxidoreductase activity, acting on the CH-NH2 group of donors, oxygen as acceptor;GO:0000166//nucleotide binding	GO:0043231//intracellular membrane-bounded organelle
fd_108	GAAC01000091	369	56	17.8404	gi|89276301|gb|ABD66507.1|	179	1e-44	actin depolymerizing factor 5 [Gossypium hirsutum]	sp|Q9ZNT3|ADF5_ARATH	164	1e-40	Actin-depolymerizing factor 5 OS=Arabidopsis thaliana GN=ADF5 PE=1 SV=1	--	--	--	--	--	K05765	5e-29	122	vvi:100242532	cofilin	-	GO:0008092//cytoskeletal protein binding	GO:0044464//cell part
fd_109	--	1158	151	15.3289	gi|15242979|ref|NP_197671.1|	438	1e-122	RER1 (RETICULATA-RELATED 1) [Arabidopsis thaliana] >gi|13605899|gb|AAK32935.1|AF367348_1 AT5g22790/K8E10_2 [Arabidopsis thaliana] >gi|19548025|gb|AAL87376.1| AT5g22790/K8E10_2 [Arabidopsis thaliana]	--	--	--	--	--	--	--	--	--	--	--	--	--	--	-	-	-
fd_110	GAAC01000092	419	41	11.503	gi|115456755|ref|NP_001051978.1|	65.1	2e-10	Os03g0861100 [Oryza sativa Japonica Group] >gi|108712232|gb|ABG00027.1| expressed protein [Oryza sativa (japonica cultivar-group)] >gi|113550449|dbj|BAF13892.1| Os03g0861100 [Oryza sativa Japonica Group]	--	--	--	--	--	--	--	--	--	--	--	--	--	--	-	-	-
fd_111	GAAC01000093	758	241	37.3758	gi|30316394|sp|Q9T034.3|SYFA_ARATH	448	1e-125	RecName: Full=Probable phenylalanyl-tRNA synthetase alpha chain; AltName: Full=Phenylalanine--tRNA ligase alpha chain; Short=PheRS >gi|20453179|gb|AAM19830.1| AT4g39280/T22F8_180 [Arabidopsis thaliana] >gi|25141225|gb|AAN73307.1| At4g39280/T22F8_180 [Arabidopsis thaliana]	sp|Q9T034|SYFA_ARATH	448	2e-125	Probable phenylalanyl-tRNA synthetase alpha chain OS=Arabidopsis thaliana GN=At4g39280 PE=2 SV=3	ECU07g1660	309	3e-84	COG0016	Phenylalanyl-tRNA synthetase alpha subunit	K01889	4e-127	450	vvi:100260671	phenylalanyl-tRNA synthetase alpha chain [EC:6.1.1.20]	-	-	-
fd_112	--	185	4	2.5417	--	--	--	--	--	--	--	--	--	--	--	--	--	--	--	--	--	--	-	-	-
fd_113	GAAC01000094	931	125	15.7835	gi|220682974|gb|ACL80329.1|	388	1e-107	UDP-glucose pyrophosphorylase [Saccharum officinarum]	sp|P19595|UGPA_SOLTU	387	4e-107	UTP--glucose-1-phosphate uridylyltransferase OS=Solanum tuberosum PE=1 SV=3	SPCC1322.04	248	1e-65	COG4284	UDP-glucose pyrophosphorylase	K00963	3e-108	388	sbi:SORBI_04g001320	UTP--glucose-1-phosphate uridylyltransferase [EC:2.7.7.9]	-	-	-
fd_114	GAAC01000095	622	103	19.4666	gi|18423239|ref|NP_568751.1|	120	1e-55	PABN1 (POLYADENYLATE-BINDING PROTEIN 1); RNA binding / poly(A) binding / protein binding [Arabidopsis thaliana] >gi|15809838|gb|AAL06847.1| AT5g51120/MWD22_6 [Arabidopsis thaliana]	sp|O14327|PAB2_SCHPO	85.5	1e-24	Polyadenylate-binding protein 2 OS=Schizosaccharomyces pombe GN=pab2 PE=2 SV=1	--	--	--	--	--	--	--	--	--	--	-	GO:0003729//mRNA binding	GO:0016020//membrane
fd_115	GAAC01000096	293	19	7.6231	--	--	--	--	--	--	--	--	--	--	--	--	--	--	--	--	--	--	-	-	-
fd_116	GAAC01000097	335	30	10.5274	gi|124365591|gb|ABN09825.1|	132	2e-30	Thioredoxin domain 2; Thioredoxin fold [Medicago truncatula]	sp|O64654|TRXL1_ARATH	106	5e-23	Thioredoxin-like 1 OS=Arabidopsis thaliana GN=At1g08570 PE=2 SV=1	--	--	--	--	--	--	--	--	--	--	GO:0019725//cellular homeostasis	GO:0016667//oxidoreductase activity, acting on sulfur group of donors	GO:0009941//chloroplast envelope;GO:0009532//plastid stroma
fd_117	--	177	4	2.6566	--	--	--	--	--	--	--	--	--	--	--	--	--	--	--	--	--	--	-	-	-
fd_118	GAAC01000098	246	169	80.7597	gi|224144535|ref|XP_002325324.1|	130	3e-30	cytochrome P450 [Populus trichocarpa] >gi|222862199|gb|EEE99705.1| cytochrome P450 [Populus trichocarpa]	sp|Q05047|C72A1_CATRO	95.9	7e-20	Secologanin synthase OS=Catharanthus roseus GN=CYP72A1 PE=2 SV=1	mlr5192	58.9	2e-09	COG2124	Cytochrome P450	K00232	2e-24	107	vvi:100249305	acyl-CoA oxidase [EC:1.3.3.6]	GO:0008152//metabolic process	GO:0016634;GO:0005506//iron ion binding	-
fd_119	GAAC01000099	275	8	3.4198	gi|223452383|gb|ACM89519.1|	142	9e-34	protein kinase [Glycine max]	sp|P27450|CX32_ARATH	132	9e-31	Probable serine/threonine-protein kinase Cx32, chloroplastic OS=Arabidopsis thaliana GN=At4g35600 PE=1 SV=2	BS_yloP_1	58.5	3e-09	COG0515	Serine/threonine protein kinase	K00924	6e-32	132	ath:AT4G35600	[EC:2.7.1.-]	GO:0006464//protein modification process	GO:0004713//protein tyrosine kinase activity;GO:0032559//adenyl ribonucleotide binding	GO:0043231//intracellular membrane-bounded organelle
fd_120	GAAC01000100	429	64	17.5374	gi|297741556|emb|CBI32688.3|	115	1e-25	unnamed protein product [Vitis vinifera]	--	--	--	--	--	--	--	--	--	--	--	--	--	--	-	-	-
fd_121	GAAC01000101	391	113	33.9739	gi|145337690|ref|NP_177909.2|	53.5	7e-07	KOM (KOMPEITO) [Arabidopsis thaliana]	--	--	--	--	--	--	--	--	--	--	--	--	--	--	-	-	-
fd_122	GAAC01000102	665	45	7.9549	gi|6692104|gb|AAF24569.1|AC007764_11	56.6	2e-07	F22C12.24 [Arabidopsis thaliana]	sp|Q9M4A1|SPO12_ARATH	53.1	1e-06	Meiotic recombination protein SPO11-2 OS=Arabidopsis thaliana GN=SPO11-2 PE=1 SV=1	--	--	--	--	--	--	--	--	--	--	GO:0048229//gametophyte development;GO:0007127//meiosis I;GO:0009791//post-embryonic development;GO:0003006//reproductive developmental process	GO:0005488//binding	-
fd_123	--	157	102	76.3737	gi|71000473|dbj|BAE07182.1|	111	2e-24	S-adenosyl-L-homocysteine hydrolase [Beta vulgaris]	sp|O23255|SAHH1_ARATH	107	2e-23	Adenosylhomocysteinase 1 OS=Arabidopsis thaliana GN=SAHH1 PE=1 SV=1	RSc0093	52	3e-07	COG0499	S-adenosylhomocysteine hydrolase	K01251	7e-25	108	vvi:100265604	adenosylhomocysteinase [EC:3.3.1.1]	GO:0044237//cellular metabolic process	GO:0016802	-
fd_124	--	150	1	0.7837	--	--	--	--	--	--	--	--	--	--	--	--	--	--	--	--	--	--	-	-	-
fd_125	GAAC01000103	290	62	25.1326	gi|18401727|ref|NP_029426.1|	171	3e-42	SAND family protein [Arabidopsis thaliana] >gi|15983791|gb|AAL10492.1| At2g28390/T1B3.9 [Arabidopsis thaliana] >gi|20197735|gb|AAD20687.2| expressed protein [Arabidopsis thaliana] >gi|22137018|gb|AAM91354.1| At2g28390/T1B3.9 [Arabidopsis thaliana]	sp|Q86VX9|MON1A_HUMAN	84.3	2e-16	Vacuolar fusion protein MON1 homolog A OS=Homo sapiens GN=MON1A PE=1 SV=2	--	--	--	--	--	--	--	--	--	--	GO:0009987//cellular process;GO:0015031//protein transport	-	GO:0044464//cell part
fd_126	GAAC01000104	398	59	17.4266	gi|11072016|gb|AAG28895.1|AC008113_11	179	7e-45	F12A21.24 [Arabidopsis thaliana]	sp|P33611|DPOA2_MOUSE	79.3	6e-15	DNA polymerase alpha subunit B OS=Mus musculus GN=Pola2 PE=1 SV=1	SPCC553.09c	54.3	6e-08	COG5214	DNA polymerase alpha-primase complex, polymerase-associated subunit B	K02321	1e-56	214	vvi:100257984	DNA polymerase alpha subunit B	GO:0006259//DNA metabolic process	GO:0003676//nucleic acid binding;GO:0034061	-
fd_127	--	164	52	37.2737	gi|18410994|ref|NP_565124.1|	99.8	9e-21	nucleic acid binding [Arabidopsis thaliana] >gi|15724324|gb|AAL06555.1|AF412102_1 At1g76010/T4O12_22 [Arabidopsis thaliana] >gi|16226599|gb|AAL16210.1|AF428441_1 At1g76010/T4O12_22 [Arabidopsis thaliana] >gi|15809882|gb|AAL06869.1| At1g76010/T4O12_22 [Arabidopsis thaliana] >gi|21700865|gb|AAM70556.1| At1g76010/T4O12_22 [Arabidopsis thaliana]	sp|Q99JH1|CI023_MOUSE	49.3	7e-06	Alba-like protein C9orf23 homolog OS=Mus musculus PE=2 SV=1	--	--	--	--	--	--	--	--	--	--	-	GO:0003676//nucleic acid binding	-
fd_128	GAAC01000105	236	4	1.9925	gi|42567704|ref|NP_196298.2|	114	3e-25	myb family transcription factor [Arabidopsis thaliana]	sp|Q9SAK5|APL_ARATH	70.5	3e-12	Myb family transcription factor APL OS=Arabidopsis thaliana GN=APL PE=2 SV=2	--	--	--	--	--	--	--	--	--	--	GO:0010468//regulation of gene expression	GO:0003676//nucleic acid binding	GO:0043231//intracellular membrane-bounded organelle
fd_129	GAAC01000106	251	82	38.4046	gi|297800548|ref|XP_002868158.1|	166	1e-40	At4g16144 [Arabidopsis lyrata subsp. lyrata] >gi|297313994|gb|EFH44417.1| At4g16144 [Arabidopsis lyrata subsp. lyrata]	sp|Q9P371|SST2_SCHPO	121	1e-27	AMSH-like protease sst2 OS=Schizosaccharomyces pombe GN=sst2 PE=1 SV=1	SPAC19B12.10	121	4e-28	COG1310	Predicted metal-dependent protease of the PAD1/JAB1 superfamily	K11866	2e-42	166	pop:POPTR_805251	STAM-binding protein [EC:3.1.2.15]	GO:0051603//proteolysis involved in cellular protein catabolic process;GO:0006886//intracellular protein transport;GO:0070646;GO:0010638//positive regulation of organelle organization	GO:0005488//binding	GO:0044464//cell part
fd_130	GAAC01000107	715	201	33.0471	gi|186519798|ref|NP_001119162.1|	219	3e-56	ATEXO70A1 (exocyst subunit EXO70 family protein A1); protein binding [Arabidopsis thaliana]	sp|Q9UPT5|EXOC7_HUMAN	70.1	1e-11	Exocyst complex component 7 OS=Homo sapiens GN=EXOC7 PE=1 SV=3	--	--	--	--	--	K07195	2e-57	219	ath:AT5G03540	exocyst complex component 7	GO:0010101;GO:0048278//vesicle docking;GO:0006464//protein modification process	GO:0004672//protein kinase activity;GO:0032559//adenyl ribonucleotide binding	GO:0043231//intracellular membrane-bounded organelle;GO:0043234//protein complex;GO:0044444//cytoplasmic part;GO:0016020//membrane
fd_131	GAAC01000108	531	455	100.73	gi|198400321|gb|ACH87169.1|	297	5e-91	MYB transcription factor [Camellia sinensis]	sp|Q54IF9|MYBG_DICDI	51.6	3e-11	Myb-like protein G OS=Dictyostelium discoideum GN=mybG PE=3 SV=1	--	--	--	--	--	--	--	--	--	--	GO:0010038//response to metal ion;GO:0009725//response to hormone stimulus;GO:0010468//regulation of gene expression;GO:0048511//rhythmic process;GO:0006970//response to osmotic stress;GO:0006351//transcription, DNA-dependent	GO:0003676//nucleic acid binding	GO:0043231//intracellular membrane-bounded organelle
fd_132	GAAC01000109	639	97	17.8449	gi|9650826|emb|CAC00657.1|	95.5	3e-36	common plant regulatory factor 6 [Petroselinum crispum]	sp|P24068|OCS1_MAIZE	59.7	2e-14	Ocs element-binding factor 1 OS=Zea mays GN=OBF1 PE=2 SV=2	--	--	--	--	--	K04371	4e-13	43.1	vvi:100254083	extracellular signal-regulated kinase 1/2 [EC:2.7.11.24]	GO:0006351//transcription, DNA-dependent	GO:0003677//DNA binding;GO:0046983//protein dimerization activity	GO:0043231//intracellular membrane-bounded organelle
fd_133	GAAC01000110	231	15	7.6335	gi|115476190|ref|NP_001061691.1|	82.8	1e-15	Os08g0379400 [Oryza sativa Japonica Group] >gi|113623660|dbj|BAF23605.1| Os08g0379400 [Oryza sativa Japonica Group]	sp|Q9ZUC1|QORL_ARATH	71.2	2e-12	Quinone oxidoreductase-like protein At1g23740, chloroplastic OS=Arabidopsis thaliana GN=At1g23740 PE=1 SV=2	mll2116	60.5	7e-10	COG0604	NADPH:quinone reductase and related Zn-dependent oxidoreductases	K07119	3e-06	46.6	ath:AT1G49670		GO:0008152//metabolic process	GO:0046914//transition metal ion binding;GO:0016655//oxidoreductase activity, acting on NADH or NADPH, quinone or similar compound as acceptor	GO:0043231//intracellular membrane-bounded organelle
fd_134	GAAC01000111	499	113	26.6208	gi|225428015|ref|XP_002278452.1|	319	1e-86	PREDICTED: similar to KAK (KAKTUS) isoform 2 [Vitis vinifera]	sp|Q6WWW4|UPL3_ARATH	311	1e-84	E3 ubiquitin-protein ligase UPL3 OS=Arabidopsis thaliana GN=UPL3 PE=1 SV=1	YKL010c	60.8	1e-09	COG5021	Ubiquitin-protein ligase	K10590	6e-88	319	vvi:100264024	E3 ubiquitin-protein ligase TRIP12 [EC:6.3.2.19]	GO:0006261//DNA-dependent DNA replication;GO:0043412;GO:0000904//cell morphogenesis involved in differentiation	GO:0016879//ligase activity, forming carbon-nitrogen bonds	GO:0016020//membrane
fd_135	--	847	79	10.9645	gi|297607562|ref|NP_001060171.2|	233	1e-108	Os07g0596300 [Oryza sativa Japonica Group] >gi|255677941|dbj|BAF22085.2| Os07g0596300 [Oryza sativa Japonica Group]	sp|Q9FLQ7|FH20_ARATH	236	7e-111	Formin-like protein 20 OS=Arabidopsis thaliana GN=FH20 PE=2 SV=2	--	--	--	--	--	--	--	--	--	--	GO:0007010//cytoskeleton organization	GO:0008092//cytoskeletal protein binding	-
fd_136	GAAC01000112	454	13	3.3661	--	--	--	--	--	--	--	--	--	--	--	--	--	--	--	--	--	--	-	-	-
fd_137	GAAC01000113	214	26	14.2825	--	--	--	--	--	--	--	--	--	--	--	--	--	--	--	--	--	--	-	-	-
fd_138	GAAC01000114	302	21	8.1744	gi|77556830|gb|ABA99626.1|	175	1e-43	Protein kinase domain containing protein, expressed [Oryza sativa (japonica cultivar-group)] >gi|108863039|gb|ABG22114.1| Protein kinase domain containing protein, expressed [Oryza sativa (japonica cultivar-group)]	sp|Q5R814|PRP4B_PONAB	82.4	8e-16	Serine/threonine-protein kinase PRP4 homolog OS=Pongo abelii GN=PRPF4B PE=2 SV=1	--	--	--	--	--	K08827	4e-46	179	vvi:100247382	serine/threonine-protein kinase PRP4 [EC:2.7.11.1]	GO:0006464//protein modification process	GO:0004672//protein kinase activity;GO:0032559//adenyl ribonucleotide binding	GO:0043231//intracellular membrane-bounded organelle
fd_139	GAAC01000115	301	33	12.8882	gi|51536458|gb|AAU05467.1|	154	4e-37	At5g22850 [Arabidopsis thaliana] >gi|55733777|gb|AAV59285.1| At5g22850 [Arabidopsis thaliana]	sp|Q9S9K4|ASPL2_ARATH	59.7	5e-09	Aspartic proteinase-like protein 2 OS=Arabidopsis thaliana GN=At1g65240 PE=1 SV=2	--	--	--	--	--	K00924	2e-38	154	ath:AT5G22850	[EC:2.7.1.-]	GO:0019538//protein metabolic process	GO:0004175//endopeptidase activity	GO:0031410//cytoplasmic vesicle
fd_140	GAAC01000116	284	41	16.971	gi|297837447|ref|XP_002886605.1|	62.4	2e-09	protein binding protein [Arabidopsis lyrata subsp. lyrata] >gi|297332446|gb|EFH62864.1| protein binding protein [Arabidopsis lyrata subsp. lyrata]	--	--	--	--	--	--	--	--	--	--	--	--	--	--	-	GO:0046914//transition metal ion binding	-
fd_141	GAAC01000117	1047	178	19.9856	gi|225455092|ref|XP_002267865.1|	593	0	PREDICTED: similar to GLT1 (NADH-dependent glutamate synthase 1 gene) [Vitis vinifera]	sp|Q03460|GLSN_MEDSA	592	0	Glutamate synthase [NADH], amyloplastic OS=Medicago sativa PE=1 SV=1	SPAPB1E7.07_2	374	1e-114	COG0069	Glutamate synthase domain 2	K00264	0	599	pop:POPTR_824538	glutamate synthase (NADPH/NADH) [EC:1.4.1.13 1.4.1.14]	GO:0006536//glutamate metabolic process	GO:0045181//glutamate synthase activity, NADH or NADPH as acceptor;GO:0030554//adenyl nucleotide binding;GO:0046914//transition metal ion binding;GO:0051536//iron-sulfur cluster binding	GO:0009536//plastid
fd_142	GAAC01000118	345	18	6.1333	gi|2194144|gb|AAB61119.1|	99	1e-20	F20P5.8 [Arabidopsis thaliana]	sp|Q9VKB4|RPF1_DROME	50.4	3e-06	Probable ribosome production factor 1 OS=Drosophila melanogaster GN=CG6712 PE=2 SV=1	--	--	--	--	--	--	--	--	--	--	-	GO:0005488//binding	GO:0009536//plastid
fd_143	GAAC01000119	236	11	5.4793	gi|108861898|sp|Q8GUG7.2|RH50_ARATH	136	6e-32	RecName: Full=DEAD-box ATP-dependent RNA helicase 50 >gi|15081735|gb|AAK82522.1| AT3g06980/F17A9_13 [Arabidopsis thaliana] >gi|16519315|emb|CAC82719.1| DEAD-box RNA Helicase [Arabidopsis thaliana] >gi|21360513|gb|AAM47372.1| AT3g06980/F17A9_13 [Arabidopsis thaliana]	sp|Q8GUG7|RH50_ARATH	136	3e-32	DEAD-box ATP-dependent RNA helicase 50 OS=Arabidopsis thaliana GN=RH50 PE=2 SV=2	SPAC1F7.02c	68.9	2e-12	COG0513	Superfamily II DNA and RNA helicases	K13179	1e-13	71.2	olu:OSTLU_25999	ATP-dependent RNA helicase DDX18 [EC:3.6.4.13]	-	GO:0003676//nucleic acid binding;GO:0042623//ATPase activity, coupled;GO:0032559//adenyl ribonucleotide binding	GO:0009536//plastid
fd_144	--	180	6	3.9185	--	--	--	--	--	--	--	--	--	--	--	--	--	--	--	--	--	--	-	-	-
fd_145	--	192	29	17.7558	gi|15234659|ref|NP_192429.1|	52	2e-06	protein kinase family protein [Arabidopsis thaliana] >gi|75335771|sp|Q9M0X5.1|CRK25_ARATH RecName: Full=Cysteine-rich receptor-like protein kinase 25; Short=Cysteine-rich RLK25; Flags: Precursor >gi|7267280|emb|CAB81062.1| receptor protein kinase-like protein [Arabidopsis thaliana]	sp|Q9M0X5|CRK25_ARATH	52	1e-06	Cysteine-rich receptor-like protein kinase 25 OS=Arabidopsis thaliana GN=CRK25 PE=2 SV=1	--	--	--	--	--	--	--	--	--	--	-	GO:0004672//protein kinase activity	-
fd_146	--	184	6	3.8333	--	--	--	--	--	--	--	--	--	--	--	--	--	--	--	--	--	--	-	-	-
fd_147	GAAC01000120	887	100	13.2532	--	--	--	--	--	--	--	--	--	--	--	--	--	--	--	--	--	--	-	-	-
fd_148	GAAC01000121	412	1118	318.998	gi|225435480|ref|XP_002285503.1|	248	1e-65	PREDICTED: similar to ADP,ATP carrier protein, mitochondrial [Vitis vinifera]	sp|P27081|ADT2_SOLTU	237	1e-62	ADP,ATP carrier protein, mitochondrial (Fragment) OS=Solanum tuberosum GN=ANT1 PE=2 SV=1	--	--	--	--	--	K05863	7e-67	248	vvi:100260298	solute carrier family 25 (mitochondrial carrier; adenine nucleotide translocator)	GO:0006862//nucleotide transport	GO:0046914//transition metal ion binding;GO:0015300//solute:solute antiporter activity	GO:0019866//organelle inner membrane;GO:0009526//plastid envelope;GO:0031224//intrinsic to membrane;GO:0030312//external encapsulating structure;GO:0031981//nuclear lumen
fd_149	GAAC01000122	686	47	8.0541	gi|8886987|gb|AAF80647.1|AC012190_3	234	9e-61	Contains similarity to Nodulin 21 from Soybean gb|X16488 [Arabidopsis thaliana]	sp|P16313|NO21_SOYBN	179	2e-44	Nodulin-21 OS=Glycine max PE=2 SV=1	DR1601	105	7e-23	COG1814	Uncharacterized membrane protein	--	--	--	--	--	-	-	-
fd_150	GAAC01000123	287	130	53.2482	gi|21261784|emb|CAD32500.1|	202	1e-51	protein kinase Ck2 regulatory subunit 2 [Nicotiana tabacum]	sp|P40229|CSK2C_ARATH	193	3e-49	Casein kinase II subunit beta' OS=Arabidopsis thaliana GN=CKB2 PE=1 SV=1	SPAC1851.03	113	7e-26	COG5041	Casein kinase II, beta subunit	K03115	1e-52	201	pop:POPTR_826719	casein kinase 2, beta polypeptide	-	GO:0019207//kinase regulator activity;GO:0016772//transferase activity, transferring phosphorus-containing groups	GO:0043234//protein complex
fd_151	GAAC01000124	607	586	113.489	gi|297829000|ref|XP_002882382.1|	214	4e-55	WNK1 [Arabidopsis lyrata subsp. lyrata] >gi|297328222|gb|EFH58641.1| WNK1 [Arabidopsis lyrata subsp. lyrata]	sp|Q9CAV6|WNK1_ARATH	214	2e-55	Serine/threonine-protein kinase WNK1 OS=Arabidopsis thaliana GN=WNK1 PE=1 SV=1	--	--	--	--	--	K12132	4e-55	210	pop:POPTR_1096507	serine/threonine-protein kinase WNK1 [EC:2.7.11.1]	GO:0006464//protein modification process;GO:0048511//rhythmic process	GO:0004702//receptor signaling protein serine/threonine kinase activity;GO:0032559//adenyl ribonucleotide binding	GO:0044464//cell part
fd_152	GAAC01000125	375	20	6.2696	gi|15230186|ref|NP_189120.1|	138	2e-32	F-box family protein [Arabidopsis thaliana] >gi|122214862|sp|Q3EB08.1|FBK69_ARATH RecName: Full=F-box/kelch-repeat protein At3g24760	sp|Q3EB08|FBK69_ARATH	138	9e-33	F-box/kelch-repeat protein At3g24760 OS=Arabidopsis thaliana GN=At3g24760 PE=2 SV=1	--	--	--	--	--	--	--	--	--	--	-	-	-
fd_153	GAAC01000126	521	74	16.697	gi|115482622|ref|NP_001064904.1|	105	3e-34	Os10g0486900 [Oryza sativa Japonica Group] >gi|110289293|gb|AAP54357.2| TPR Domain containing protein, expressed [Oryza sativa (japonica cultivar-group)] >gi|113639513|dbj|BAF26818.1| Os10g0486900 [Oryza sativa Japonica Group]	sp|Q99614|TTC1_HUMAN	62.4	4e-14	Tetratricopeptide repeat protein 1 OS=Homo sapiens GN=TTC1 PE=1 SV=1	--	--	--	--	--	--	--	--	--	--	GO:0050896//response to stimulus	-	GO:0043231//intracellular membrane-bounded organelle
fd_154	GAAC01000127	344	269	91.9257	gi|226495213|ref|NP_001151563.1|	164	4e-40	CBS domain containing protein [Zea mays] >gi|195647750|gb|ACG43343.1| CBS domain containing protein [Zea mays]	--	--	--	--	--	--	--	--	--	--	--	--	--	--	-	-	GO:0043231//intracellular membrane-bounded organelle
fd_155	GAAC01000128	551	233	49.7104	gi|18423442|ref|NP_568779.1|	128	3e-29	F-box family protein [Arabidopsis thaliana] >gi|75262683|sp|Q9FLX3.1|FB293_ARATH RecName: Full=F-box protein At5g52880 >gi|15810028|gb|AAL06941.1| AT5g52880/MXC20_10 [Arabidopsis thaliana] >gi|22135765|gb|AAM91039.1| AT5g52880/MXC20_10 [Arabidopsis thaliana]	sp|Q9FLX3|FB293_ARATH	128	2e-29	F-box protein At5g52880 OS=Arabidopsis thaliana GN=At5g52880 PE=2 SV=1	--	--	--	--	--	--	--	--	--	--	-	-	GO:0043231//intracellular membrane-bounded organelle
fd_156	GAAC01000129	258	7	3.1895	--	--	--	--	--	--	--	--	--	--	--	--	--	--	--	--	--	--	-	-	-
fd_157	--	833	37	5.2216	--	--	--	--	--	--	--	--	--	--	--	--	--	--	--	--	--	--	-	-	-
fd_158	GAAC01000130	356	20	6.6042	gi|75338884|sp|Q9ZR40.1|U2A2B_NICPL	122	2e-27	RecName: Full=Splicing factor U2af large subunit B; AltName: Full=U2 small nuclear ribonucleoprotein auxiliary factor large subunit B; Short=U2 snRNP auxiliary factor large subunit B; AltName: Full=U2 auxiliary factor 65 kDa subunit B; AltName: Full=NpU2AF65b >gi|3850821|emb|CAA77135.1| U2 snRNP auxiliary factor, large subunit [Nicotiana plumbaginifolia]	sp|Q9ZR40|U2A2B_NICPL	122	9e-28	Splicing factor U2af large subunit B OS=Nicotiana plumbaginifolia GN=U2AF65B PE=2 SV=1	--	--	--	--	--	K12837	4e-29	122	vvi:100241076	splicing factor U2AF 65 kDa subunit	GO:0006396//RNA processing	GO:0003676//nucleic acid binding	GO:0043231//intracellular membrane-bounded organelle
fd_159	GAAC01000131	881	98	13.0766	gi|15222221|ref|NP_177671.1|	341	6e-93	wound-responsive protein-related [Arabidopsis thaliana] >gi|30699096|ref|NP_849890.1| wound-responsive protein-related [Arabidopsis thaliana] >gi|30699098|ref|NP_849891.1| wound-responsive protein-related [Arabidopsis thaliana] >gi|10120446|gb|AAG13071.1|AC023754_9 Unknown protein [Arabidopsis thaliana] >gi|15809929|gb|AAL06892.1| At1g75380/F1B16_15 [Arabidopsis thaliana] >gi|17978881|gb|AAL47412…	--	--	--	--	aq_283	59.3	8e-09	COG1259	Uncharacterized conserved protein	K08999	2e-17	86.3	rcu:RCOM_0783240	hypothetical protein	-	-	-
fd_160	GAAC01000132	410	772	221.349	gi|187372954|gb|ACD03211.1|	188	2e-47	xyloglucan endotransglucosylase/hydrolase 1 [Actinidia eriantha]	sp|Q8L9A9|XTH8_ARATH	184	1e-46	Probable xyloglucan endotransglucosylase/hydrolase protein 8 OS=Arabidopsis thaliana GN=XTH8 PE=2 SV=1	BH3231	56.2	2e-08	COG2273	Beta-glucanase/Beta-glucan synthetase	K08235	1e-49	191	rcu:RCOM_0905690	xyloglucan:xyloglucosyl transferase [EC:2.4.1.207]	GO:0044042//glucan metabolic process	GO:0016798//hydrolase activity, acting on glycosyl bonds;GO:0016758//transferase activity, transferring hexosyl groups	GO:0005576//extracellular region;GO:0031410//cytoplasmic vesicle;GO:0030312//external encapsulating structure
fd_161	GAAC01000133	320	30	11.0208	gi|124359697|gb|ABD32367.2|	76.3	1e-13	cig3, related [Medicago truncatula]	--	--	--	--	--	--	--	--	--	--	--	--	--	--	-	-	-
fd_162	GAAC01000134	638	174	32.0606	gi|87240431|gb|ABD32289.1|	320	8e-87	tRNA-binding arm; t-snare [Medicago truncatula]	sp|Q0WVL7|GOGC5_ARATH	302	1e-81	Golgin candidate 5 OS=Arabidopsis thaliana GN=GC5 PE=1 SV=1	--	--	--	--	--	--	--	--	--	--	-	GO:0005488//binding	GO:0043231//intracellular membrane-bounded organelle
fd_163	GAAC01000135	234	126	63.2991	gi|224065409|ref|XP_002301803.1|	145	1e-34	glycosyltransferase, CAZy family GT8 [Populus trichocarpa] >gi|222843529|gb|EEE81076.1| glycosyltransferase, CAZy family GT8 [Populus trichocarpa]	sp|Q9LSG3|GAUT8_ARATH	137	2e-32	Galacturonosyltransferase 8 OS=Arabidopsis thaliana GN=GAUT8 PE=1 SV=1	--	--	--	--	--	--	--	--	--	--	GO:0045489//pectin biosynthetic process	GO:0008194//UDP-glycosyltransferase activity	GO:0043231//intracellular membrane-bounded organelle
fd_164	--	186	72	45.5054	gi|187942421|gb|ACD40019.1|	91.3	3e-18	DNase 2 [Eucommia ulmoides] >gi|187942425|gb|ACD40021.1| DNase 2 [Eucommia ulmoides]	sp|Q39635|Y38K_CORSE	76.6	4e-14	Uncharacterized 38.1 kDa protein OS=Corydalis sempervirens PE=2 SV=1	--	--	--	--	--	--	--	--	--	--	GO:0006412//translation	GO:0004518//nuclease activity;GO:0016876//ligase activity, forming aminoacyl-tRNA and related compounds;GO:0032559//adenyl ribonucleotide binding	GO:0044424//intracellular part
fd_165	GAAC01000136	855	153	21.0363	gi|16215467|emb|CAC82998.1|	531	1e-150	calcium-dependent protein kinase 2 [Nicotiana tabacum]	sp|Q38870|CDPK2_ARATH	526	5e-149	Calcium-dependent protein kinase 2 OS=Arabidopsis thaliana GN=CPK2 PE=1 SV=1	ECU01g0630	108	1e-23	COG0515	Serine/threonine protein kinase	K13412	2e-152	534	vvi:100249224	calcium-dependent protein kinase [EC:2.7.11.1]	-	-	-
fd_166	GAAC01000137	1127	282	29.415	gi|225428015|ref|XP_002278452.1|	627	1e-179	PREDICTED: similar to KAK (KAKTUS) isoform 2 [Vitis vinifera]	sp|Q6WWW4|UPL3_ARATH	529	2e-149	E3 ubiquitin-protein ligase UPL3 OS=Arabidopsis thaliana GN=UPL3 PE=1 SV=1	--	--	--	--	--	K10590	4e-180	627	vvi:100264024	E3 ubiquitin-protein ligase TRIP12 [EC:6.3.2.19]	-	-	-
fd_167	GAAC01000138	364	67	21.638	gi|30685906|ref|NP_850224.1|	197	3e-50	apoptosis inhibitory 5 (API5) family protein [Arabidopsis thaliana]	sp|Q54CL0|API5_DICDI	55.5	1e-07	Apoptosis inhibitor 5 homolog OS=Dictyostelium discoideum GN=api5 PE=3 SV=1	--	--	--	--	--	--	--	--	--	--	GO:0043066//negative regulation of apoptosis	-	-
fd_168	GAAC01000139	255	100	46.1002	gi|15234659|ref|NP_192429.1|	69.3	1e-11	protein kinase family protein [Arabidopsis thaliana] >gi|75335771|sp|Q9M0X5.1|CRK25_ARATH RecName: Full=Cysteine-rich receptor-like protein kinase 25; Short=Cysteine-rich RLK25; Flags: Precursor >gi|7267280|emb|CAB81062.1| receptor protein kinase-like protein [Arabidopsis thaliana]	sp|Q9M0X5|CRK25_ARATH	69.3	7e-12	Cysteine-rich receptor-like protein kinase 25 OS=Arabidopsis thaliana GN=CRK25 PE=2 SV=1	--	--	--	--	--	--	--	--	--	--	-	GO:0004672//protein kinase activity	-
fd_169	GAAC01000140	1369	243	20.8663	gi|56202182|dbj|BAD73660.1|	278	1e-118	S-receptor kinase-like [Oryza sativa Japonica Group] >gi|56202247|dbj|BAD73688.1| S-receptor kinase-like [Oryza sativa Japonica Group]	sp|P17841|SLSG4_BRAOL	90.5	1e-26	S-locus-specific glycoprotein S14 (Fragment) OS=Brassica oleracea GN=SLSG PE=2 SV=1	--	--	--	--	--	--	--	--	--	--	-	-	-
fd_170	GAAC01000141	335	15	5.2637	--	--	--	--	--	--	--	--	--	--	--	--	--	--	--	--	--	--	-	-	-
fd_171	--	152	38	29.3889	--	--	--	--	--	--	--	--	--	--	--	--	--	--	--	--	--	--	-	-	-
fd_172	GAAC01000142	243	32	15.4806	--	--	--	--	--	--	--	--	--	--	--	--	--	--	--	--	--	--	-	-	-
fd_173	GAAC01000143	297	14	5.5413	gi|147818585|emb|CAN74112.1|	55.1	2e-07	hypothetical protein [Vitis vinifera]	--	--	--	--	--	--	--	--	--	--	--	--	--	--	-	GO:0046872//metal ion binding	-
fd_174	GAAC01000144	474	31	7.6882	gi|297797789|ref|XP_002866779.1|	53.1	1e-06	amino acid transporter family protein [Arabidopsis lyrata subsp. lyrata] >gi|297312614|gb|EFH43038.1| amino acid transporter family protein [Arabidopsis lyrata subsp. lyrata]	sp|Q54DK4|AK1_DICDI	50.4	5e-06	Alpha-protein kinase 1 OS=Dictyostelium discoideum GN=ak1 PE=3 SV=1	--	--	--	--	--	--	--	--	--	--	-	-	-
fd_175	GAAC01000145	263	65	29.0537	--	--	--	--	--	--	--	--	--	--	--	--	--	--	--	--	--	--	-	-	-
fd_176	GAAC01000146	746	68	10.7155	gi|20975614|emb|CAD31712.1|	285	4e-76	Ser/Thr protein kinase [Cicer arietinum]	sp|Q9LK35|THE1_ARATH	270	7e-72	Receptor-like protein kinase THESEUS 1 OS=Arabidopsis thaliana GN=THE1 PE=1 SV=1	CAC1728_1	64.7	2e-10	COG0515	Serine/threonine protein kinase	K04733	8e-53	203	ath:AT5G38990	interleukin-1 receptor-associated kinase 4 [EC:2.7.11.1]	GO:0006464//protein modification process	GO:0004672//protein kinase activity;GO:0032559//adenyl ribonucleotide binding	-
fd_177	GAAC01000147	1871	460	28.902	gi|290490572|dbj|BAI79273.1|	699	0	LysM type receptor kinase [Lotus japonicus]	sp|C0LGG7|Y1534_ARATH	219	5e-56	Probable LRR receptor-like serine/threonine-protein kinase At1g53420 OS=Arabidopsis thaliana GN=At1g53420 PE=2 SV=2	Cgl2127_1	96.7	1e-19	COG0515	Serine/threonine protein kinase	K13429	0	731	vvi:100255092	chitin elicitor receptor kinase 1	GO:0009056//catabolic process;GO:0044255//cellular lipid metabolic process;GO:0006464//protein modification process	GO:0004871//signal transducer activity;GO:0004713//protein tyrosine kinase activity;GO:0032559//adenyl ribonucleotide binding	GO:0031410//cytoplasmic vesicle
fd_178	GAAC01000148	573	80	16.4126	gi|42407609|dbj|BAD08724.1|	95.5	3e-19	F-box protein family-like [Oryza sativa Japonica Group] >gi|42408294|dbj|BAD09449.1| F-box protein family-like [Oryza sativa Japonica Group]	sp|Q9FVS1|FBK23_ARATH	69.3	2e-11	F-box/kelch-repeat protein At1g57790 OS=Arabidopsis thaliana GN=At1g57790 PE=2 SV=1	--	--	--	--	--	--	--	--	--	--	-	-	-
fd_179	GAAC01000149	351	95	31.817	gi|297790792|ref|XP_002863281.1|	130	3e-30	oxidoreductase [Arabidopsis lyrata subsp. lyrata] >gi|297309115|gb|EFH39540.1| oxidoreductase [Arabidopsis lyrata subsp. lyrata]	sp|Q8H0M1|QORH_SPIOL	117	2e-26	Quinone-oxidoreductase homolog, chloroplastic OS=Spinacia oleracea GN=QOR PE=1 SV=1	lin0622	61.2	4e-10	COG0604	NADPH:quinone reductase and related Zn-dependent oxidoreductases	K00344	3e-09	56.6	ath:AT5G61510	NADPH2:quinone reductase [EC:1.6.5.5]	GO:0008152//metabolic process	GO:0046914//transition metal ion binding;GO:0016491//oxidoreductase activity	GO:0009534//chloroplast thylakoid;GO:0016020//membrane
fd_180	--	155	2	1.5168	gi|157283641|gb|ABV30847.1|	74.7	3e-13	NBS-containing resistance-like protein [Platanus x acerifolia]	sp|Q40392|TMVRN_NICGU	53.9	3e-07	TMV resistance protein N OS=Nicotiana glutinosa GN=N PE=1 SV=1	--	--	--	--	--	--	--	--	--	--	GO:0006952//defense response;GO:0012501//programmed cell death	GO:0004872//receptor activity;GO:0016462//pyrophosphatase activity;GO:0032559//adenyl ribonucleotide binding	GO:0044425//membrane part
fd_181	GAAC01000150	320	32	11.7556	gi|14517444|gb|AAK62612.1|	89.4	1e-17	AT5g35570/K2K18_1 [Arabidopsis thaliana] >gi|21360449|gb|AAM47340.1| AT5g35570/K2K18_1 [Arabidopsis thaliana]	--	--	--	--	--	--	--	--	--	--	--	--	--	--	-	-	GO:0009536//plastid
fd_182	GAAC01000151	238	26	12.8422	gi|42568402|ref|NP_199685.2|	73.9	5e-13	leucine-rich repeat family protein / protein kinase family protein [Arabidopsis thaliana] >gi|264664537|sp|C0LGV0.1|Y5487_ARATH RecName: Full=Probable LRR receptor-like serine/threonine-protein kinase At5g48740; Flags: Precursor >gi|224589707|gb|ACN59385.1| leucine-rich repeat receptor-like protein kinase [Arabidopsis thaliana]	sp|C0LGV0|Y5487_ARATH	73.9	3e-13	Probable LRR receptor-like serine/threonine-protein kinase At5g48740 OS=Arabidopsis thaliana GN=At5g48740 PE=2 SV=1	--	--	--	--	--	K04733	7e-12	65.5	ath:AT5G38990	interleukin-1 receptor-associated kinase 4 [EC:2.7.11.1]	GO:0006464//protein modification process	GO:0004871//signal transducer activity;GO:0004672//protein kinase activity;GO:0032559//adenyl ribonucleotide binding	-
fd_183	GAAC01000152	691	80	13.6099	gi|117970379|dbj|BAF36749.1|	88.6	6e-17	telomere binding protein [Solanum lycopersicum]	sp|Q9LL45|TBP1_ORYSJ	53.9	9e-07	Telomere-binding protein 1 OS=Oryza sativa subsp. japonica GN=TBP1 PE=1 SV=2	--	--	--	--	--	--	--	--	--	--	-	-	-
fd_184	--	616	39	7.4426	gi|224115502|ref|XP_002332150.1|	190	4e-54	argonaute protein group [Populus trichocarpa] >gi|222875200|gb|EEF12331.1| argonaute protein group [Populus trichocarpa]	sp|Q7XTS4|AGO2_ORYSJ	135	2e-33	Protein argonaute 2 OS=Oryza sativa subsp. japonica GN=AGO2 PE=2 SV=2	--	--	--	--	--	K11596	8e-21	97.1	osa:4333732	argonaute	GO:0035195//gene silencing by miRNA;GO:0050793//regulation of developmental process;GO:0030422//production of siRNA involved in RNA interference;GO:0009791//post-embryonic development	GO:0003676//nucleic acid binding	-
fd_185	GAAC01000153	820	103	14.7661	gi|33589692|gb|AAQ22612.1|	178	6e-44	At4g13030 [Arabidopsis thaliana]	--	--	--	--	--	--	--	--	--	--	--	--	--	--	-	-	GO:0043231//intracellular membrane-bounded organelle
fd_186	GAAC01000154	751	154	24.1059	gi|18423070|ref|NP_568713.1|	365	1e-100	emb1879 (embryo defective 1879) [Arabidopsis thaliana]	sp|Q91W34|CP058_MOUSE	82	4e-15	UPF0420 protein C16orf58 homolog OS=Mus musculus PE=2 SV=1	--	--	--	--	--	--	--	--	--	--	-	-	-
fd_187	GAAC01000155	306	25	9.6042	--	--	--	--	--	--	--	--	--	--	--	--	--	--	--	--	--	--	-	-	-
fd_188	GAAC01000156	739	148	23.5429	gi|209977652|gb|ACJ04334.1|	397	1e-110	ubiquitin specific protease 12 [Nicotiana tabacum]	sp|Q9FPT1|UBP12_ARATH	381	2e-105	Ubiquitin carboxyl-terminal hydrolase 12 OS=Arabidopsis thaliana GN=UBP12 PE=2 SV=2	YMR304w	136	4e-32	COG5077	Ubiquitin carboxyl-terminal hydrolase	K11838	1e-116	415	vvi:100252573	ubiquitin carboxyl-terminal hydrolase 7 [EC:3.1.2.15]	-	-	-
fd_189	--	158	143	106.395	gi|297829870|ref|XP_002882817.1|	79	2e-14	WD-40 repeat family protein [Arabidopsis lyrata subsp. lyrata] >gi|297328657|gb|EFH59076.1| WD-40 repeat family protein [Arabidopsis lyrata subsp. lyrata]	--	--	--	--	--	--	--	--	--	--	--	--	--	--	-	-	GO:0019897//extrinsic to plasma membrane;GO:0031461//cullin-RING ubiquitin ligase complex
fd_190	GAAC01000157	330	59	21.0175	gi|13540823|gb|AAK29467.1|	100	6e-21	polyprotein-like [Solanum chilense]	sp|P10978|POLX_TOBAC	92.8	6e-19	Retrovirus-related Pol polyprotein from transposon TNT 1-94 OS=Nicotiana tabacum PE=2 SV=1	--	--	--	--	--	--	--	--	--	--	-	GO:0005488//binding;GO:0016787//hydrolase activity	GO:0043231//intracellular membrane-bounded organelle
fd_191	GAAC01000158	263	89	39.7812	gi|15226140|ref|NP_180923.1|	127	4e-29	MLO5 (MILDEW RESISTANCE LOCUS O 5); calmodulin binding [Arabidopsis thaliana] >gi|6137253|sp|O22815.1|MLO5_ARATH RecName: Full=MLO-like protein 5; Short=AtMlo5 >gi|20196844|gb|AAM14803.1| similar to Mlo proteins from H. vulgare [Arabidopsis thaliana]	sp|O22815|MLO5_ARATH	127	2e-29	MLO-like protein 5 OS=Arabidopsis thaliana GN=MLO5 PE=2 SV=1	--	--	--	--	--	K08472	2e-30	127	ath:AT2G33670	mlo protein	GO:0009987//cellular process;GO:0006950//response to stress	-	GO:0031224//intrinsic to membrane
fd_192	--	192	16	9.7963	--	--	--	--	--	--	--	--	--	--	--	--	--	--	--	--	--	--	-	-	-
fd_193	GAAC01000159	339	21	7.2822	--	--	--	--	--	--	--	--	--	--	--	--	--	--	--	--	--	--	-	-	-
fd_194	GAAC01000160	205	26	14.9095	--	--	--	--	--	--	--	--	--	--	--	--	--	--	--	--	--	--	-	-	-
fd_195	GAAC01000161	1565	333	25.0134	gi|115470935|ref|NP_001059066.1|	283	1e-111	Os07g0185700 [Oryza sativa Japonica Group] >gi|113610602|dbj|BAF20980.1| Os07g0185700 [Oryza sativa Japonica Group]	sp|Q68CZ6|HAUS3_HUMAN	60.1	1e-17	HAUS augmin-like complex subunit 3 OS=Homo sapiens GN=HAUS3 PE=1 SV=1	--	--	--	--	--	--	--	--	--	--	-	-	GO:0043231//intracellular membrane-bounded organelle
fd_196	--	172	6	4.1008	--	--	--	--	--	--	--	--	--	--	--	--	--	--	--	--	--	--	-	-	-
fd_197	GAAC01000162	598	43	8.453	gi|208429106|gb|ACI26722.1|	250	7e-66	receptor-like kinase [Nicotiana glutinosa]	sp|Q94C25|Y5005_ARATH	140	4e-33	Probable receptor-like protein kinase At5g20050 OS=Arabidopsis thaliana GN=At5g20050 PE=2 SV=1	CAC0404_1	52.4	5e-07	COG0515	Serine/threonine protein kinase	K13417	2e-26	115	ath:AT2G13790	somatic embryogenesis receptor kinase 4 [EC:2.7.10.1 2.7.11.1]	GO:0006464//protein modification process;GO:0008037//cell recognition	GO:0030246//carbohydrate binding;GO:0004702//receptor signaling protein serine/threonine kinase activity;GO:0032559//adenyl ribonucleotide binding	GO:0031410//cytoplasmic vesicle
fd_198	GAAC01000163	461	34	8.67	gi|18423233|ref|NP_568750.1|	259	1e-68	ERD1 (EARLY RESPONSIVE TO DEHYDRATION 1); ATP binding / ATPase/ nucleoside-triphosphatase/ nucleotide binding / protein binding [Arabidopsis thaliana] >gi|1169544|sp|P42762.1|ERD1_ARATH RecName: Full=ERD1 protein, chloroplastic; Flags: Precursor >gi|497629|dbj|BAA04506.1| ERD1 protein [Arabidopsis thaliana] >gi|10177198|dbj|BAB10330.1| Erd1 protein precursor [Arabidopsis thaliana]	sp|P42762|ERD1_ARATH	259	6e-69	ERD1 protein, chloroplastic OS=Arabidopsis thaliana GN=ERD1 PE=2 SV=1	alr2999	183	1e-46	COG0542	ATPases with chaperone activity, ATP-binding subunit	K03696	2e-70	261	pop:POPTR_773307	ATP-dependent Clp protease ATP-binding subunit ClpC	GO:0043170	GO:0017111//nucleoside-triphosphatase activity;GO:0032559//adenyl ribonucleotide binding	GO:0009526//plastid envelope;GO:0009532//plastid stroma
fd_199	GAAC01000164	227	30	15.536	--	--	--	--	--	--	--	--	--	--	--	--	--	--	--	--	--	--	-	-	-
fd_200	GAAC01000165	1163	239	24.158	gi|15231451|ref|NP_190238.1|	181	2e-44	epsin N-terminal homology (ENTH) domain-containing protein / clathrin assembly protein-related [Arabidopsis thaliana]	sp|Q4V882|EPN3_RAT	94.7	1e-18	Epsin-3 OS=Rattus norvegicus GN=Epn3 PE=1 SV=1	--	--	--	--	--	--	--	--	--	--	-	-	-
fd_201	GAAC01000166	1038	171	19.3661	gi|119360155|gb|ABL66806.1|	190	3e-47	At3g56720 [Arabidopsis thaliana]	sp|Q7L4I2|RSRC2_HUMAN	68.6	7e-11	Arginine/serine-rich coiled-coil protein 2 OS=Homo sapiens GN=RSRC2 PE=1 SV=1	--	--	--	--	--	--	--	--	--	--	-	-	-
fd_202	GAAC01000167	1108	370	39.2559	gi|112383514|gb|ABI17894.1|	434	1e-131	vacuolar invertase [Coffea canephora]	sp|P80065|INVB_DAUCA	420	2e-127	Beta-fructofuranosidase, soluble isoenzyme I OS=Daucus carota GN=INV*DC4 PE=1 SV=2	--	--	--	--	--	K01193	7e-113	379	vvi:100241232	beta-fructofuranosidase [EC:3.2.1.26]	-	-	-
fd_203	GAAC01000168	275	5	2.1374	--	--	--	--	--	--	--	--	--	--	--	--	--	--	--	--	--	--	-	-	-
fd_204	GAAC01000169	522	54	12.1609	gi|116310795|emb|CAH67586.1|	157	8e-38	OSIGBa0112M24.3 [Oryza sativa (indica cultivar-group)]	sp|Q6P6Q9|CBAA1_RAT	50.4	6e-06	Calcium-binding atopy-related autoantigen 1 OS=Rattus norvegicus GN=Cbara1 PE=2 SV=1	--	--	--	--	--	--	--	--	--	--	-	-	GO:0031410//cytoplasmic vesicle;GO:0043231//intracellular membrane-bounded organelle
fd_205	--	159	84	62.1048	gi|192911936|gb|ACF06576.1|	102	1e-21	ubiquitin fusion degradation protein [Elaeis guineensis]	sp|Q9ES53|UFD1_RAT	80.1	4e-15	Ubiquitin fusion degradation protein 1 homolog OS=Rattus norvegicus GN=Ufd1l PE=1 SV=1	SPBC16A3.09c	75.1	3e-14	COG5140	Ubiquitin fusion-degradation protein	--	--	--	--	--	GO:0019941//modification-dependent protein catabolic process	-	-
fd_206	GAAC01000170	503	25	5.8427	gi|20269057|emb|CAC84709.1|	100	8e-21	aux/IAA protein [Populus tremula x Populus tremuloides]	sp|Q38829|IAA11_ARATH	82	2e-15	Auxin-responsive protein IAA11 OS=Arabidopsis thaliana GN=IAA11 PE=2 SV=1	--	--	--	--	--	--	--	--	--	--	GO:0009725//response to hormone stimulus;GO:0009987//cellular process	-	-
fd_207	GAAC01000171	377	13	4.0536	--	--	--	--	--	--	--	--	--	--	--	--	--	--	--	--	--	--	-	-	-
fd_208	--	172	62	42.3747	gi|183211896|gb|ACC59198.1|	103	5e-22	1-acyl-sn-glycerol-3-phosphate acyltransferase [Ricinus communis]	sp|Q6IWY1|LPAT2_BRAOL	98.6	1e-20	1-acyl-sn-glycerol-3-phosphate acyltransferase 2 OS=Brassica oleracea GN=LPAT2 PE=2 SV=1	--	--	--	--	--	K13523	2e-23	103	rcu:RCOM_0090060	lysophosphatidic acid acyltransferase / lysophosphatidylinositol acyltransferase [EC:2.3.1.51 2.3.1.-]	GO:0006644//phospholipid metabolic process	GO:0016411//acylglycerol O-acyltransferase activity	GO:0031090//organelle membrane;GO:0043231//intracellular membrane-bounded organelle;GO:0031224//intrinsic to membrane
fd_209	--	186	1	0.632	gi|116310937|emb|CAH67874.1|	105	1e-22	OSIGBa0153E02-OSIGBa0093I20.3 [Oryza sativa (indica cultivar-group)]	sp|P10978|POLX_TOBAC	77	3e-14	Retrovirus-related Pol polyprotein from transposon TNT 1-94 OS=Nicotiana tabacum PE=2 SV=1	--	--	--	--	--	--	--	--	--	--	GO:0006259//DNA metabolic process	GO:0046914//transition metal ion binding;GO:0003676//nucleic acid binding	-
fd_210	GAAC01000172	251	5	2.3417	--	--	--	--	--	--	--	--	--	--	--	--	--	--	--	--	--	--	-	-	-
fd_211	--	190	11	6.8058	--	--	--	--	--	--	--	--	--	--	--	--	--	--	--	--	--	--	-	-	-
fd_212	--	966	132	16.0635	gi|15221378|ref|NP_177003.1|	178	1e-43	zinc finger protein-related [Arabidopsis thaliana] >gi|117958743|gb|ABK59680.1| At1g68360 [Arabidopsis thaliana]	sp|Q39265|ZFP6_ARATH	136	2e-31	Zinc finger protein 6 OS=Arabidopsis thaliana GN=ZFP6 PE=2 SV=1	--	--	--	--	--	--	--	--	--	--	-	GO:0005488//binding	GO:0043229//intracellular organelle
fd_213	GAAC01000173	424	43	11.9219	gi|42568915|ref|NP_178474.2|	105	7e-42	GEK1 (GEKO1); D-aminoacyl-tRNA deacylase [Arabidopsis thaliana] >gi|83302950|sp|Q9ZPQ3.2|GEK1_ARATH RecName: Full=D-aminoacyl-tRNA deacylase; AltName: Full=Ethanol tolerance protein GEKO1 >gi|28812213|dbj|BAC65101.1| GEKO1 [Arabidopsis thaliana] >gi|63025186|gb|AAY27066.1| At2g03800 [Arabidopsis thaliana]	sp|Q9ZPQ3|GEK1_ARATH	105	4e-42	D-aminoacyl-tRNA deacylase OS=Arabidopsis thaliana GN=GEK1 PE=1 SV=2	--	--	--	--	--	--	--	--	--	--	-	GO:0004091//carboxylesterase activity	GO:0043231//intracellular membrane-bounded organelle
fd_214	GAAC01000174	443	38	10.0838	--	--	--	--	--	--	--	--	--	--	--	--	--	--	--	--	--	--	-	-	-
fd_215	GAAC01000175	646	64	11.6464	gi|102139786|gb|ABF69971.1|	134	7e-31	glycosyl transferase family 31 protein [Musa acuminata]	sp|Q6NQB7|B3GT7_ARATH	132	2e-30	Beta-1,3-galactosyltransferase 7 OS=Arabidopsis thaliana GN=B3GALT7 PE=2 SV=1	--	--	--	--	--	--	--	--	--	--	GO:0006464//protein modification process	GO:0016758//transferase activity, transferring hexosyl groups	GO:0043231//intracellular membrane-bounded organelle;GO:0031224//intrinsic to membrane
fd_216	GAAC01000176	255	41	18.9011	gi|15218421|ref|NP_177372.1|	152	1e-36	AERO1 (Arabidopsis endoplasmic reticulum oxidoreductins 1); FAD binding / electron carrier/ oxidoreductase, acting on sulfur group of donors, disulfide as acceptor / protein binding [Arabidopsis thaliana] >gi|50400631|sp|Q9C7S7.1|ERO1_ARATH RecName: Full=Endoplasmic oxidoreductin-1; Flags: Precursor >gi|31711714|gb|AAP68213.1| At1g72280 [Arabidopsis thaliana] >gi|110743908|dbj|BAE99788.1| like di…	sp|Q9C7S7|ERO1_ARATH	152	8e-37	Endoplasmic oxidoreductin-1 OS=Arabidopsis thaliana GN=AERO1 PE=1 SV=1	SPCC1450.14c	77	8e-15	COG5061	Oxidoreductin, endoplasmic reticulum membrane-associated protein involved in disulfide bond formation	K00391	1e-37	150	osa:4334011	[EC:1.8.4.-]	GO:0006457//protein folding	GO:0030554//adenyl nucleotide binding;GO:0016667//oxidoreductase activity, acting on sulfur group of donors	GO:0031090//organelle membrane;GO:0043231//intracellular membrane-bounded organelle
fd_217	GAAC01000177	353	234	77.9263	gi|115477531|ref|NP_001062361.1|	101	2e-21	Os08g0536100 [Oryza sativa Japonica Group] >gi|113624330|dbj|BAF24275.1| Os08g0536100 [Oryza sativa Japonica Group]	--	--	--	--	--	--	--	--	--	--	--	--	--	--	-	-	-
fd_218	--	1020	188	21.6671	gi|6069485|dbj|BAA85454.1|	205	1e-103	S-locus protein 5 [Brassica rapa]	sp|Q6Y2X3|DJC14_HUMAN	66.2	8e-17	DnaJ homolog subfamily C member 14 OS=Homo sapiens GN=DNAJC14 PE=2 SV=2	NMA1461_1	53.1	7e-07	COG2214	DnaJ-class molecular chaperone	K09534	8e-86	171	osa:4352775	DnaJ homolog subfamily C member 14	GO:0044267//cellular protein metabolic process	GO:0005515//protein binding	GO:0043231//intracellular membrane-bounded organelle
fd_219	GAAC01000178	256	90	41.3281	gi|53850802|gb|AAU95462.1|	175	1e-43	mitogen-activated protein kinase 9 [Brassica napus]	sp|Q9LV37|MPK9_ARATH	174	1e-43	Mitogen-activated protein kinase 9 OS=Arabidopsis thaliana GN=MPK9 PE=2 SV=2	YBL016w	82.8	1e-16	COG0515	Serine/threonine protein kinase	K00924	1e-41	164	ath:AT2G01450	[EC:2.7.1.-]	GO:0009755//hormone-mediated signaling pathway;GO:0006464//protein modification process	GO:0032559//adenyl ribonucleotide binding;GO:0004702//receptor signaling protein serine/threonine kinase activity	GO:0043231//intracellular membrane-bounded organelle;GO:0044444//cytoplasmic part
fd_220	GAAC01000179	408	38	10.9488	gi|15223013|ref|NP_177760.1|	108	2e-23	integral membrane family protein [Arabidopsis thaliana] >gi|6573714|gb|AAF17634.1|AC009978_10 T23E18.26 [Arabidopsis thaliana] >gi|29329821|emb|CAD83087.1| GONST3 Golgi Nucleotide sugar transporter [Arabidopsis thaliana]	--	--	--	--	--	--	--	--	--	--	--	--	--	--	-	-	GO:0031224//intrinsic to membrane
fd_221	GAAC01000180	950	174	21.5312	gi|15230176|ref|NP_191255.1|	507	1e-143	PIP5K4 (PHOSPHATIDYL INOSITOL MONOPHOSPHATE 5 KINASE 4); 1-phosphatidylinositol-4-phosphate 5-kinase [Arabidopsis thaliana] >gi|75181907|sp|Q9M1K2.1|PI5K4_ARATH RecName: Full=Phosphatidylinositol-4-phosphate 5-kinase 4; Short=AtPIP5K4; AltName: Full=1-phosphatidylinositol-4-phosphate kinase 4; AltName: Full=PtdIns(4)P-5-kinase 4; AltName: Full=Diphosphoinositide kinase 4 >gi|6911866|emb|CAB72166.…	sp|Q9M1K2|PI5K4_ARATH	507	4e-143	Phosphatidylinositol-4-phosphate 5-kinase 4 OS=Arabidopsis thaliana GN=PIP5K4 PE=1 SV=1	SPAC19G12.14	171	2e-42	COG5253	Phosphatidylinositol-4-phosphate 5-kinase	K00889	4e-144	507	ath:AT3G56960	1-phosphatidylinositol-4-phosphate 5-kinase [EC:2.7.1.68]	-	-	-
fd_222	GAAC01000181	260	12	5.4256	gi|108706818|gb|ABF94613.1|	114	3e-25	Targeting protein for Xklp2 containing protein, expressed [Oryza sativa (japonica cultivar-group)]	--	--	--	--	--	--	--	--	--	--	--	--	--	--	-	-	GO:0043231//intracellular membrane-bounded organelle
fd_223	GAAC01000182	411	63	18.0195	gi|108864520|gb|ABG22531.1|	126	8e-29	THUMP domain containing protein, expressed [Oryza sativa (japonica cultivar-group)]	sp|Q08438|VHS3_YEAST	55.1	1e-07	Protein VHS3 OS=Saccharomyces cerevisiae GN=VHS3 PE=1 SV=1	YOR054c	55.1	4e-08	COG0452	Phosphopantothenoylcysteine synthetase/decarboxylase	K06963	5e-30	126	osa:4350746		-	GO:0005488//binding	-
fd_224	GAAC01000183	228	67	34.5448	--	--	--	--	--	--	--	--	--	--	--	--	--	--	--	--	--	--	-	-	-
fd_225	GAAC01000184	454	84	21.7504	gi|224107859|ref|XP_002314629.1|	144	5e-59	SIN3 component, histone deacetylase complex [Populus trichocarpa] >gi|222863669|gb|EEF00800.1| SIN3 component, histone deacetylase complex [Populus trichocarpa]	sp|O48686|SIN3_ARATH	139	5e-53	Paired amphipathic helix protein Sin3 OS=Arabidopsis thaliana GN=SIN3 PE=1 SV=2	SPBC1734.16c	58.5	3e-19	COG5602	Histone deacetylase complex, SIN3 component	K11644	4e-65	159	vvi:100254234	paired amphipathic helix protein Sin3a	GO:0006351//transcription, DNA-dependent	GO:0030528//transcription regulator activity	GO:0043231//intracellular membrane-bounded organelle
fd_226	GAAC01000185	300	50	19.5926	--	--	--	--	--	--	--	--	--	--	--	--	--	--	--	--	--	--	-	-	-
fd_227	GAAC01000186	320	90	33.0625	gi|16930439|gb|AAL31905.1|AF419573_1	149	7e-36	AT4g27720/T29A15_210 [Arabidopsis thaliana] >gi|15912261|gb|AAL08264.1| AT4g27720/T29A15_210 [Arabidopsis thaliana] >gi|27764934|gb|AAO23588.1| At4g27720/T29A15_210 [Arabidopsis thaliana]	sp|Q5R542|MFSD5_PONAB	49.3	7e-06	Major facilitator superfamily domain-containing protein 5 OS=Pongo abelii GN=MFSD5 PE=2 SV=1	--	--	--	--	--	--	--	--	--	--	-	-	-
fd_228	GAAC01000187	261	13	5.8553	gi|168048373|ref|XP_001776641.1|	88.2	3e-17	double-stranded RNA binding protein [Physcomitrella patens subsp. patens] >gi|162671933|gb|EDQ58477.1| double-stranded RNA binding protein [Physcomitrella patens subsp. patens]	--	--	--	--	--	--	--	--	--	--	--	--	--	--	-	GO:0003723//RNA binding	GO:0043231//intracellular membrane-bounded organelle
fd_229	--	512	34	7.8064	--	--	--	--	--	--	--	--	--	--	--	--	--	--	--	--	--	--	-	-	-
fd_230	--	198	10	5.9371	--	--	--	--	--	--	--	--	--	--	--	--	--	--	--	--	--	--	-	-	-
fd_231	--	174	3	2.0268	--	--	--	--	--	--	--	--	--	--	--	--	--	--	--	--	--	--	-	-	-
fd_232	--	152	13	10.0541	gi|187369233|dbj|BAG31377.1|	108	1e-23	topoisomerase I [Catharanthus roseus]	sp|P93119|TOP1_DAUCA	105	1e-22	DNA topoisomerase 1 OS=Daucus carota GN=TOP1 PE=2 SV=1	SPBC1703.14c_1	65.5	2e-11	COG3569	Topoisomerase IB	K03163	2e-25	110	rcu:RCOM_0045870	DNA topoisomerase I [EC:5.99.1.2]	GO:0016568//chromatin modification;GO:0048646//anatomical structure formation involved in morphogenesis;GO:0006261//DNA-dependent DNA replication;GO:0009887//organ morphogenesis;GO:0010073//meristem maintenance;GO:0003006//reproductive developmental process	GO:0016628//oxidoreductase activity, acting on the CH-CH group of donors, NAD or NADP as acceptor;GO:0003916//DNA topoisomerase activity;GO:0032559//adenyl ribonucleotide binding	GO:0043231//intracellular membrane-bounded organelle;GO:0043232
fd_233	GAAC01000188	583	95	19.1557	gi|42568712|ref|NP_201066.2|	280	6e-75	transportin-SR-related [Arabidopsis thaliana] >gi|34365727|gb|AAQ65175.1| At5g62590 [Arabidopsis thaliana]	sp|Q6P2B1|TNPO3_MOUSE	92.4	2e-18	Transportin-3 OS=Mus musculus GN=Tnpo3 PE=1 SV=1	--	--	--	--	--	--	--	--	--	--	GO:0015031//protein transport	GO:0022892	GO:0005635//nuclear envelope
fd_234	GAAC01000189	910	218	28.1617	gi|15218229|ref|NP_177937.1|	439	1e-122	UNE2 (unfertilized embryo sac 2); carbohydrate transmembrane transporter/ sugar:hydrogen symporter [Arabidopsis thaliana] >gi|28416565|gb|AAO42813.1| At1g78130 [Arabidopsis thaliana] >gi|110742895|dbj|BAE99345.1| transporter like protein [Arabidopsis thaliana]	sp|Q797E3|PBUE_BACSU	56.6	2e-07	Purine efflux pump pbuE OS=Bacillus subtilis GN=pbuE PE=1 SV=1	PH0367	59.7	7e-09	COG0477	Permeases of the major facilitator superfamily	--	--	--	--	--	-	-	-
fd_235	GAAC01000190	610	100	19.2714	gi|225462340|ref|XP_002265801.1|	191	4e-48	PREDICTED: similar to viroid symptom modulation protein [Vitis vinifera]	sp|Q0DCT8|G11A_ORYSJ	113	8e-25	Protein kinase G11A OS=Oryza sativa subsp. japonica GN=Os06g0291600 PE=2 SV=1	--	--	--	--	--	K08286	1e-28	123	ath:AT5G47750	protein-serine/threonine kinase [EC:2.7.11.-]	GO:0006464//protein modification process;GO:0000904//cell morphogenesis involved in differentiation	GO:0004672//protein kinase activity;GO:0032559//adenyl ribonucleotide binding	-
fd_236	--	152	21	16.2412	gi|225468564|ref|XP_002262691.1|	106	9e-23	PREDICTED: similar to 3-hydroxy-3-methylglutaryl-CoA synthase [Vitis vinifera]	sp|P54873|HMCS_ARATH	99.8	5e-21	Hydroxymethylglutaryl-CoA synthase OS=Arabidopsis thaliana GN=HMGS PE=2 SV=2	YML126c	76.6	1e-14	COG3425	3-hydroxy-3-methylglutaryl CoA synthase	K01641	1e-23	104	pop:POPTR_548531	hydroxymethylglutaryl-CoA synthase [EC:2.3.3.10]	GO:0006720//isoprenoid metabolic process	GO:0046912//transferase activity, transferring acyl groups, acyl groups converted into alkyl on transfer;GO:0016747//transferase activity, transferring acyl groups other than amino-acyl groups	-
fd_237	GAAC01000191	984	123	14.6944	gi|15221582|ref|NP_177064.1|	273	2e-72	BIM2 (BES1-interacting Myc-like protein 2); DNA binding / transcription factor [Arabidopsis thaliana] >gi|61211674|sp|Q9CAA4.1|BIM2_ARATH RecName: Full=Transcription factor BIM2; AltName: Full=BES1-interacting Myc-like protein 2; AltName: Full=Transcription factor EN 125; AltName: Full=bHLH transcription factor bHLH102; AltName: Full=Basic helix-loop-helix protein 102; Short=bHLH 102; Short=AtbHL…	sp|Q9CAA4|BIM2_ARATH	273	1e-72	Transcription factor BIM2 OS=Arabidopsis thaliana GN=BIM2 PE=1 SV=1	--	--	--	--	--	K12126	9e-08	54.7	ath:AT1G09530	phytochrome-interacting factor 3	-	-	-
fd_238	--	179	20	13.1347	gi|28375522|emb|CAA39369.1|	103	8e-22	APS-AA2 [Solanum lycopersicum]	sp|P27061|PPA1_SOLLC	94.7	1e-19	Acid phosphatase 1 OS=Solanum lycopersicum GN=APS1 PE=2 SV=1	--	--	--	--	--	K02866	1e-09	57.8	osa:4332737	large subunit ribosomal protein L10e	-	GO:0016791//phosphatase activity	GO:0043231//intracellular membrane-bounded organelle
fd_239	--	171	2	1.3749	gi|297808613|ref|XP_002872190.1|	76.3	1e-13	leucine-rich repeat family protein [Arabidopsis lyrata subsp. lyrata] >gi|297318027|gb|EFH48449.1| leucine-rich repeat family protein [Arabidopsis lyrata subsp. lyrata]	sp|Q9FL51|Y5694_ARATH	50.4	3e-06	Probably inactive leucine-rich repeat receptor-like protein kinase At5g06940 OS=Arabidopsis thaliana GN=At5g06940 PE=3 SV=1	--	--	--	--	--	K00924	4e-15	76.3	ath:AT5G25930	[EC:2.7.1.-]	GO:0009987//cellular process;GO:0006952//defense response;GO:0009743//response to carbohydrate stimulus;GO:0008152//metabolic process	GO:0004674//protein serine/threonine kinase activity;GO:0016491//oxidoreductase activity;GO:0000166//nucleotide binding	GO:0031410//cytoplasmic vesicle;GO:0016020//membrane
fd_240	--	167	8	5.6314	gi|1401037|dbj|BAA07911.1|	117	3e-26	alcohol dehydrogenases homologous [Lactuca sativa]	sp|Q07264|ADH1_ZEALU	107	2e-23	Alcohol dehydrogenase 1 (Fragment) OS=Zea luxurians GN=ADH1 PE=3 SV=2	RSc0605	60.1	1e-09	COG1062	Zn-dependent alcohol dehydrogenases, class III	K00001	1e-24	107	osa:4350053	alcohol dehydrogenase [EC:1.1.1.1]	GO:0008152//metabolic process	GO:0016616//oxidoreductase activity, acting on the CH-OH group of donors, NAD or NADP as acceptor;GO:0046914//transition metal ion binding	-
fd_241	GAAC01000192	1007	205	23.9314	gi|297811421|ref|XP_002873594.1|	316	3e-85	emsy N terminus domain-containing protein [Arabidopsis lyrata subsp. lyrata] >gi|297319431|gb|EFH49853.1| emsy N terminus domain-containing protein [Arabidopsis lyrata subsp. lyrata]	--	--	--	--	--	--	--	--	--	--	--	--	--	--	GO:0008152//metabolic process	GO:0016491//oxidoreductase activity	-
fd_242	--	167	36	25.3413	gi|17978590|gb|AAL48316.1|	109	1e-23	adenylosuccinate-AMP lyase [Vigna unguiculata]	sp|P44797|PUR8_HAEIN	95.9	7e-20	Adenylosuccinate lyase OS=Haemophilus influenzae GN=purB PE=3 SV=1	RSc2720	98.2	3e-21	COG0015	Adenylosuccinate lyase	K01756	6e-27	115	vvi:100249654	adenylosuccinate lyase [EC:4.3.2.2]	GO:0009168//purine ribonucleoside monophosphate biosynthetic process	GO:0016842	GO:0009532//plastid stroma
fd_243	GAAC01000193	969	195	23.6567	gi|186532557|ref|NP_200612.2|	192	5e-48	ATFIP1[V] (Arabidopsis homolog of yeast Fip1 [V]); RNA binding / protein binding [Arabidopsis thaliana]	sp|Q5T200|ZC3HD_HUMAN	85.1	7e-16	Zinc finger CCCH domain-containing protein 13 OS=Homo sapiens GN=ZC3H13 PE=1 SV=1	--	--	--	--	--	K12811	5e-19	92	vvi:100262258	ATP-dependent RNA helicase DDX46/PRP5 [EC:3.6.4.13]	-	GO:0005515//protein binding	-
fd_244	GAAC01000194	224	279	146.42	gi|55585878|gb|AAV54051.1|	147	4e-35	3-hydroxy-3-methylglutaryl coenzyme A reductase [Eucommia ulmoides]	sp|P29057|HMDH1_HEVBR	145	6e-35	3-hydroxy-3-methylglutaryl-coenzyme A reductase 1 OS=Hevea brasiliensis GN=HMGR1 PE=2 SV=1	YML075c	108	2e-24	COG1257	Hydroxymethylglutaryl-CoA reductase	K00021	3e-35	142	osa:4346017	3-hydroxy-3-methylglutaryl-CoA reductase [EC:1.1.1.34]	GO:0006732//coenzyme metabolic process;GO:0006720//isoprenoid metabolic process	GO:0016616//oxidoreductase activity, acting on the CH-OH group of donors, NAD or NADP as acceptor;GO:0000166//nucleotide binding;GO:0048037//cofactor binding	GO:0031224//intrinsic to membrane;GO:0009526//plastid envelope;GO:0031090//organelle membrane;GO:0005740//mitochondrial envelope
fd_245	--	179	52	34.1502	gi|34481799|emb|CAC87835.1|	120	5e-27	cullin 1A [Nicotiana tabacum]	sp|Q94AH6|CUL1_ARATH	110	3e-24	Cullin-1 OS=Arabidopsis thaliana GN=CUL1 PE=1 SV=1	SPAC3A11.08	52.8	2e-07	COG5647	Cullin, a subunit of E3 ubiquitin ligase	K10609	3e-11	63.5	sbi:SORBI_01g005920	cullin 4	GO:0019941//modification-dependent protein catabolic process	GO:0019899//enzyme binding	GO:0000151//ubiquitin ligase complex
fd_246	--	172	10	6.8346	gi|297596183|ref|NP_001042140.2|	67.8	4e-11	Os01g0170400 [Oryza sativa Japonica Group] >gi|255672914|dbj|BAF04054.2| Os01g0170400 [Oryza sativa Japonica Group]	--	--	--	--	--	--	--	--	--	--	--	--	--	--	-	GO:0005488//binding	-
fd_247	--	165	4	2.8498	gi|116310763|emb|CAH67557.1|	80.1	7e-15	H0311C03.11 [Oryza sativa (indica cultivar-group)]	--	--	--	--	--	--	--	--	--	--	--	--	--	--	-	-	-
fd_248	GAAC01000195	571	177	36.4402	gi|224086456|ref|XP_002307892.1|	184	7e-46	nbs-lrr resistance protein [Populus trichocarpa] >gi|222853868|gb|EEE91415.1| nbs-lrr resistance protein [Populus trichocarpa]	sp|Q38834|R13L4_ARATH	104	4e-22	Disease resistance RPP13-like protein 4 OS=Arabidopsis thaliana GN=RPP13L4 PE=2 SV=2	--	--	--	--	--	K13457	4e-16	81.3	vvi:100252764	disease resistance protein RPM1	-	GO:0016787//hydrolase activity;GO:0005488//binding	-
fd_249	GAAC01000196	278	42	17.7602	gi|16648783|gb|AAL25582.1|	157	3e-38	AT5g13100/T19L5_60 [Arabidopsis thaliana] >gi|56381999|gb|AAV85718.1| At5g13100 [Arabidopsis thaliana]	--	--	--	--	--	--	--	--	--	--	--	--	--	--	-	-	-
fd_250	--	185	72	45.7514	gi|115451685|ref|NP_001049443.1|	115	2e-25	Os03g0227000 [Oryza sativa Japonica Group] >gi|108706957|gb|ABF94752.1| Adaptin N terminal region family protein, expressed [Oryza sativa (japonica cultivar-group)] >gi|113547914|dbj|BAF11357.1| Os03g0227000 [Oryza sativa Japonica Group]	sp|Q8H852|COPG1_ORYSJ	115	1e-25	Coatomer subunit gamma-1 OS=Oryza sativa subsp. japonica GN=Os03g0227000 PE=2 SV=2	SPAC57A7.10c	54.3	5e-08	COG5240	Vesicle coat complex COPI, gamma subunit	--	--	--	--	--	GO:0015031//protein transport	GO:0005488//binding	GO:0030120//vesicle coat
fd_251	--	185	58	36.8553	gi|290131414|gb|ADD23344.1|	122	1e-27	70 kDa heat shock protein [Triticum aestivum]	sp|Q08080|HSP7S_SPIOL	122	7e-28	Stromal 70 kDa heat shock-related protein, chloroplastic (Fragment) OS=Spinacia oleracea GN=CHSP70 PE=2 SV=1	alr1742	116	9e-27	COG0443	Molecular chaperone	K03283	5e-29	122	osa:4351875	heat shock 70kDa protein 1/8	GO:0050896//response to stimulus;GO:0044267//cellular protein metabolic process	GO:0005515//protein binding;GO:0016628//oxidoreductase activity, acting on the CH-CH group of donors, NAD or NADP as acceptor;GO:0032559//adenyl ribonucleotide binding	GO:0043231//intracellular membrane-bounded organelle
fd_252	GAAC01000197	474	23	5.7042	gi|226500442|ref|NP_001147070.1|	219	7e-57	nicalin [Zea mays] >gi|195607062|gb|ACG25361.1| nicalin precursor [Zea mays]	sp|Q6NZ07|NCLN_DANRE	103	5e-22	Nicalin-1 OS=Danio rerio GN=ncl1 PE=2 SV=1	--	--	--	--	--	--	--	--	--	--	GO:0051604//protein maturation	-	GO:0043231//intracellular membrane-bounded organelle;GO:0031224//intrinsic to membrane;GO:0031410//cytoplasmic vesicle
fd_253	GAAC01000198	851	197	27.2132	gi|2501850|gb|AAB80717.1|	506	1e-142	GDP dissociation inhibitor [Nicotiana tabacum]	sp|P60028|GDIA_PANTR	331	4e-90	Rab GDP dissociation inhibitor alpha OS=Pan troglodytes GN=GDI1 PE=2 SV=1	SPAC22H10.12c	307	2e-83	COG5044	RAB proteins geranylgeranyltransferase component A (RAB escort protein)	--	--	--	--	--	-	-	-
fd_254	GAAC01000199	296	17	6.7515	--	--	--	--	--	--	--	--	--	--	--	--	--	--	--	--	--	--	-	-	-
fd_255	GAAC01000200	252	97	45.2496	--	--	--	--	--	--	--	--	--	--	--	--	--	--	--	--	--	--	-	-	-
fd_256	GAAC01000201	287	49	20.0705	gi|225441918|ref|XP_002284505.1|	62	2e-09	PREDICTED: similar to calcium-binding EF hand family protein [Vitis vinifera]	sp|Q9FYE4|CML50_ARATH	60.1	4e-09	Probable calcium-binding protein CML50 OS=Arabidopsis thaliana GN=CML50 PE=2 SV=1	--	--	--	--	--	K13448	8e-11	62	vvi:100248601	calcium-binding protein CML	-	GO:0046872//metal ion binding	-
fd_257	GAAC01000202	773	167	25.3969	gi|297821270|ref|XP_002878518.1|	335	4e-91	EMB2221 [Arabidopsis lyrata subsp. lyrata] >gi|297324356|gb|EFH54777.1| EMB2221 [Arabidopsis lyrata subsp. lyrata]	sp|Q55CT5|SEC31_DICDI	138	5e-32	Protein transport protein SEC31 OS=Dictyostelium discoideum GN=sec31 PE=3 SV=1	--	--	--	--	--	--	--	--	--	--	-	-	GO:0031461//cullin-RING ubiquitin ligase complex
fd_258	GAAC01000203	236	778	387.535	gi|3869088|dbj|BAA34348.1|	162	1e-39	elongation factor-1 alpha [Nicotiana paniculata]	sp|P43643|EF1A_TOBAC	161	1e-39	Elongation factor 1-alpha OS=Nicotiana tabacum PE=2 SV=1	SPCC794.09c	120	8e-28	COG5256	Translation elongation factor EF-1alpha (GTPase)	K03231	2e-40	160	zma:100286309	elongation factor EF-1 alpha subunit [EC:3.6.5.3]	GO:0006412//translation	GO:0008135//translation factor activity, nucleic acid binding;GO:0032561//guanyl ribonucleotide binding;GO:0017111//nucleoside-triphosphatase activity;GO:0004779//sulfate adenylyltransferase activity	GO:0044424//intracellular part
fd_259	GAAC01000204	694	95	16.0919	gi|225461945|ref|XP_002268896.1|	161	6e-39	PREDICTED: similar to E3 ubiquitin-protein ligase UPL1 [Vitis vinifera]	sp|Q8GY23|UPL1_ARATH	160	6e-39	E3 ubiquitin-protein ligase UPL1 OS=Arabidopsis thaliana GN=UPL1 PE=1 SV=3	--	--	--	--	--	K10592	7e-90	326	rcu:RCOM_0482820	E3 ubiquitin-protein ligase HUWE1 [EC:6.3.2.19]	GO:0043412;GO:0044267//cellular protein metabolic process	GO:0019787//small conjugating protein ligase activity	GO:0043231//intracellular membrane-bounded organelle;GO:0044444//cytoplasmic part
fd_260	GAAC01000205	272	68	29.3889	gi|186519798|ref|NP_001119162.1|	167	4e-41	ATEXO70A1 (exocyst subunit EXO70 family protein A1); protein binding [Arabidopsis thaliana]	sp|Q9UPT5|EXOC7_HUMAN	49.7	6e-06	Exocyst complex component 7 OS=Homo sapiens GN=EXOC7 PE=1 SV=3	--	--	--	--	--	K07195	2e-42	167	ath:AT5G03540	exocyst complex component 7	GO:0010101;GO:0048278//vesicle docking;GO:0006350//transcription	GO:0005488//binding;GO:0016564//transcription repressor activity	GO:0043231//intracellular membrane-bounded organelle;GO:0043234//protein complex;GO:0044444//cytoplasmic part;GO:0016020//membrane
fd_261	GAAC01000206	914	227	29.196	gi|297797109|ref|XP_002866439.1|	468	1e-131	autophagy 3 [Arabidopsis lyrata subsp. lyrata] >gi|297312274|gb|EFH42698.1| autophagy 3 [Arabidopsis lyrata subsp. lyrata]	sp|Q0WWQ1|ATG3_ARATH	464	3e-130	Autophagy-related protein 3 OS=Arabidopsis thaliana GN=ATG3 PE=2 SV=2	--	--	--	--	--	K08343	1e-138	489	pop:POPTR_836380	autophagy-related protein 3	-	-	-
fd_262	GAAC01000207	342	15	5.1559	gi|40644190|emb|CAC95126.1|	41.6	5e-06	gag-pol polyprotein [Populus deltoides]	--	--	--	--	--	--	--	--	--	--	--	--	--	--	GO:0006259//DNA metabolic process	GO:0046872//metal ion binding;GO:0003676//nucleic acid binding	-
fd_263	GAAC01000208	861	121	16.5206	gi|297819256|ref|XP_002877511.1|	454	1e-127	translocon outer membrane complex 75-III [Arabidopsis lyrata subsp. lyrata] >gi|297323349|gb|EFH53770.1| translocon outer membrane complex 75-III [Arabidopsis lyrata subsp. lyrata]	sp|Q9STE8|TC753_ARATH	454	3e-127	Protein TOC75-3, chloroplastic OS=Arabidopsis thaliana GN=TOC75-3 PE=1 SV=1	alr2269	110	2e-24	COG4775	Outer membrane protein/protective antigen OMA87	K07277	3e-19	92.4	ppp:PHYPADRAFT_110734	outer membrane protein	-	-	-
fd_264	GAAC01000209	301	39	15.2315	gi|187369231|dbj|BAG31376.1|	186	5e-47	topoisomerase I [Camptotheca acuminata]	sp|P93119|TOP1_DAUCA	167	1e-41	DNA topoisomerase 1 OS=Daucus carota GN=TOP1 PE=2 SV=1	YOL006c_1	99	2e-21	COG3569	Topoisomerase IB	K03163	5e-44	172	vvi:100244754	DNA topoisomerase I [EC:5.99.1.2]	GO:0006261//DNA-dependent DNA replication	GO:0003916//DNA topoisomerase activity;GO:0032559//adenyl ribonucleotide binding;GO:0034061	GO:0043232;GO:0043231//intracellular membrane-bounded organelle
fd_265	GAAC01000210	736	134	21.4028	gi|189163920|gb|ACD77110.1|	453	1e-126	protein kinase 1b [Solanum lycopersicum]	sp|Q06548|APK1A_ARATH	427	3e-119	Protein kinase APK1A, chloroplastic OS=Arabidopsis thaliana GN=APK1A PE=2 SV=1	CAC0404_1	90.1	3e-18	COG0515	Serine/threonine protein kinase	K00924	6e-117	416	osa:4337593	[EC:2.7.1.-]	-	-	-
fd_266	GAAC01000211	263	55	24.5839	gi|115473585|ref|NP_001060391.1|	162	1e-39	Os07g0636000 [Oryza sativa Japonica Group] >gi|113611927|dbj|BAF22305.1| Os07g0636000 [Oryza sativa Japonica Group]	sp|Q9LD90|DKC1_ARATH	162	8e-40	H/ACA ribonucleoprotein complex subunit 4 OS=Arabidopsis thaliana GN=NAP57 PE=1 SV=1	YLR175w	152	1e-37	COG0130	Pseudouridine synthase	K11131	1e-43	171	pop:POPTR_865471	H/ACA ribonucleoprotein complex subunit 4 [EC:5.4.99.-]	GO:0010467//gene expression;GO:0009451//RNA modification	GO:0016866//intramolecular transferase activity;GO:0003676//nucleic acid binding	GO:0044444//cytoplasmic part;GO:0031981//nuclear lumen
fd_267	GAAC01000212	308	39	14.8853	gi|297804746|ref|XP_002870257.1|	209	8e-54	SET domain-containing protein [Arabidopsis lyrata subsp. lyrata] >gi|297316093|gb|EFH46516.1| SET domain-containing protein [Arabidopsis lyrata subsp. lyrata]	sp|O23372|ATXR3_ARATH	207	2e-53	Probable histone-lysine N-methyltransferase ATXR3 OS=Arabidopsis thaliana GN=ATXR3 PE=1 SV=2	SPCC306.04c	76.3	1e-14	COG2940	Proteins containing SET domain	K11422	8e-14	72	rcu:RCOM_1602600	histone-lysine N-methyltransferase SETD1 [EC:2.1.1.43]	-	GO:0016279//protein-lysine N-methyltransferase activity;GO:0046914//transition metal ion binding	GO:0043231//intracellular membrane-bounded organelle
fd_268	GAAC01000213	580	126	25.5379	gi|268053527|gb|ACY92425.1|	368	1e-101	exportin-1 [Solanum lycopersicum]	sp|Q80U96|XPO1_RAT	276	8e-74	Exportin-1 OS=Rattus norvegicus GN=Xpo1 PE=2 SV=1	SPAC1805.17	253	1e-67	COG5101	Importin beta-related nuclear transport receptor	--	--	--	--	--	GO:0015031//protein transport	GO:0022892;GO:0022857//transmembrane transporter activity	GO:0031224//intrinsic to membrane
fd_269	GAAC01000214	365	31	9.9842	gi|115469600|ref|NP_001058399.1|	92	5e-21	Os06g0685700 [Oryza sativa Japonica Group] >gi|75253259|sp|Q653H7.1|ARFR_ORYSJ RecName: Full=Auxin response factor 18; AltName: Full=OsARF10 >gi|113596439|dbj|BAF20313.1| Os06g0685700 [Oryza sativa Japonica Group]	sp|Q653H7|ARFR_ORYSJ	92	2e-21	Auxin response factor 18 OS=Oryza sativa subsp. japonica GN=ARF18 PE=2 SV=1	--	--	--	--	--	--	--	--	--	--	GO:0010468//regulation of gene expression;GO:0006351//transcription, DNA-dependent;GO:0009755//hormone-mediated signaling pathway	GO:0003676//nucleic acid binding;GO:0005515//protein binding	GO:0043231//intracellular membrane-bounded organelle
fd_270	GAAC01000215	886	230	30.5167	gi|30685521|ref|NP_193897.2|	313	1e-84	proline-rich spliceosome-associated (PSP) family protein [Arabidopsis thaliana] >gi|25082966|gb|AAN72024.1| spliceosome associated protein - like [Arabidopsis thaliana] >gi|34365737|gb|AAQ65180.1| At4g21660 [Arabidopsis thaliana]	sp|Q13435|SF3B2_HUMAN	172	4e-42	Splicing factor 3B subunit 2 OS=Homo sapiens GN=SF3B2 PE=1 SV=1	SPAC22F8.10c	134	3e-31	COG5182	Splicing factor 3b, subunit 2	K12829	4e-94	341	vvi:100241488	splicing factor 3B subunit 2	GO:0006396//RNA processing	GO:0005488//binding	GO:0009536//plastid
fd_271	GAAC01000216	293	34	13.6413	gi|224127590|ref|XP_002320112.1|	168	1e-41	white-brown-complex ABC transporter family [Populus trichocarpa] >gi|222860885|gb|EEE98427.1| white-brown-complex ABC transporter family [Populus trichocarpa]	sp|Q9LFG8|AB20G_ARATH	164	1e-40	ABC transporter G family member 20 OS=Arabidopsis thaliana GN=ABCG20 PE=2 SV=1	--	--	--	--	--	K12843	3e-43	169	vvi:100248403	U4/U6 small nuclear ribonucleoprotein PRP3	GO:0051707//response to other organism	GO:0015405//P-P-bond-hydrolysis-driven transmembrane transporter activity;GO:0015604//phosphonate transmembrane transporter activity;GO:0017111//nucleoside-triphosphatase activity;GO:0032559//adenyl ribonucleotide binding	GO:0016020//membrane
fd_272	GAAC01000217	953	67	8.2647	gi|224062902|ref|XP_002300926.1|	397	1e-110	cytochrome P450 [Populus trichocarpa] >gi|222842652|gb|EEE80199.1| cytochrome P450 [Populus trichocarpa]	sp|Q9FH76|ABAH3_ARATH	188	4e-47	Abscisic acid 8'-hydroxylase 3 OS=Arabidopsis thaliana GN=CYP707A3 PE=1 SV=1	slr0574	109	6e-24	COG2124	Cytochrome P450	K09843	8e-46	181	ath:AT5G45340	(+)-abscisic acid 8'-hydroxylase [EC:1.14.13.93]	GO:0009628//response to abiotic stimulus;GO:0008152//metabolic process	GO:0004497//monooxygenase activity;GO:0005506//iron ion binding	-
fd_273	GAAC01000218	212	125	69.3134	gi|123192431|gb|ABM73376.1|	161	2e-39	Ran1 [Pisum sativum]	sp|P38548|RAN_VICFA	161	1e-39	GTP-binding nuclear protein Ran/TC4 OS=Vicia faba PE=2 SV=1	ECU04g1560	60.5	7e-10	COG1100	GTPase SAR1 and related small G proteins	K07936	7e-41	161	vvi:100266996	GTP-binding nuclear protein Ran	GO:0051169//nuclear transport;GO:0015031//protein transport	GO:0032561//guanyl ribonucleotide binding;GO:0017111//nucleoside-triphosphatase activity	-
fd_274	GAAC01000219	352	51	17.0322	gi|297838695|ref|XP_002887229.1|	194	3e-49	appr-1-p processing enzyme family protein [Arabidopsis lyrata subsp. lyrata] >gi|297333070|gb|EFH63488.1| appr-1-p processing enzyme family protein [Arabidopsis lyrata subsp. lyrata]	sp|Q54TH9|GACY_DICDI	76.6	4e-14	Rho GTPase-activating protein gacY OS=Dictyostelium discoideum GN=gacY PE=3 SV=1	--	--	--	--	--	--	--	--	--	--	-	-	GO:0043231//intracellular membrane-bounded organelle
fd_275	GAAC01000220	416	46	12.9989	gi|124360700|gb|ABN08689.1|	222	1e-57	Aminoacyl-tRNA synthetase, class Ia [Medicago truncatula]	sp|Q8BMJ2|SYLC_MOUSE	174	1e-43	Leucyl-tRNA synthetase, cytoplasmic OS=Mus musculus GN=Lars PE=2 SV=2	SPAC26F1.13c	150	6e-37	COG0495	Leucyl-tRNA synthetase	K01869	2e-59	224	vvi:100248927	leucyl-tRNA synthetase [EC:6.1.1.4]	GO:0006418//tRNA aminoacylation for protein translation	GO:0004812//aminoacyl-tRNA ligase activity;GO:0032559//adenyl ribonucleotide binding	GO:0044424//intracellular part
fd_276	GAAC01000221	346	24	8.1541	gi|145338044|ref|NP_186956.2|	207	3e-53	ATP binding / ATPase/ nucleoside-triphosphatase/ nucleotide binding [Arabidopsis thaliana]	sp|P12957|CALD1_CHICK	61.6	1e-09	Caldesmon OS=Gallus gallus GN=CALD1 PE=1 SV=2	NMB0700	48.1	4e-06	COG3468	Type V secretory pathway, adhesin AidA	--	--	--	--	--	-	GO:0046914//transition metal ion binding;GO:0042623//ATPase activity, coupled;GO:0032559//adenyl ribonucleotide binding	GO:0043234//protein complex;GO:0005618//cell wall
fd_277	GAAC01000222	274	423	181.482	gi|239819394|gb|ACS28251.1|	187	4e-47	cell division control protein [Nicotiana glutinosa]	sp|P54774|CDC48_SOYBN	187	2e-47	Cell division cycle protein 48 homolog OS=Glycine max GN=CDC48 PE=2 SV=1	YDL126c	150	7e-37	COG0464	ATPases of the AAA+ class	K13525	2e-48	187	zma:100274218	transitional endoplasmic reticulum ATPase	GO:0009987//cellular process	GO:0032559//adenyl ribonucleotide binding;GO:0042623//ATPase activity, coupled	GO:0016020//membrane
fd_278	--	153	11	8.4517	gi|3201547|emb|CAB01591.1|	119	1e-26	endochitinase [Persea americana]	sp|P05315|CHIT_SOLTU	109	6e-24	Endochitinase OS=Solanum tuberosum PE=2 SV=1	--	--	--	--	--	K01183	1e-21	97.8	osa:4338718	chitinase [EC:3.2.1.14]	GO:0033554//cellular response to stress;GO:0006026	GO:0004553//hydrolase activity, hydrolyzing O-glycosyl compounds;GO:0030247//polysaccharide binding	GO:0043231//intracellular membrane-bounded organelle;GO:0030312//external encapsulating structure
fd_279	--	165	17	12.1118	gi|7523675|gb|AAF63115.1|AC006423_16	108	2e-23	Hypothetical protein [Arabidopsis thaliana]	sp|Q8W234|SEUSS_ARATH	108	1e-23	Transcriptional corepressor SEUSS OS=Arabidopsis thaliana GN=SEU PE=1 SV=1	--	--	--	--	--	--	--	--	--	--	GO:0048438//floral whorl development	GO:0003676//nucleic acid binding;GO:0046983//protein dimerization activity	GO:0043231//intracellular membrane-bounded organelle
fd_280	GAAC01000223	492	117	27.9553	gi|15223025|ref|NP_172853.1|	255	2e-67	VIK (VH1-INTERACTING KINASE); ATP binding / protein kinase/ protein serine/threonine/tyrosine kinase [Arabidopsis thaliana] >gi|5080776|gb|AAD39286.1|AC007576_9 Similar to protein kinases [Arabidopsis thaliana] >gi|111074450|gb|ABH04598.1| At1g14000 [Arabidopsis thaliana]	sp|Q6XHB2|ROCO4_DICDI	82.8	9e-16	Probable serine/threonine-protein kinase roco4 OS=Dictyostelium discoideum GN=roco4 PE=3 SV=1	YAR019c	52.8	3e-07	COG0515	Serine/threonine protein kinase	K04427	4e-14	73.9	olu:OSTLU_42011	mitogen-activated protein kinase kinase kinase 7 [EC:2.7.11.25]	GO:0043401;GO:0010051//xylem and phloem pattern formation;GO:0007165//signal transduction;GO:0006464//protein modification process	GO:0004713//protein tyrosine kinase activity;GO:0032559//adenyl ribonucleotide binding	-
fd_281	GAAC01000224	779	109	16.4487	gi|6503292|gb|AAF14668.1|AC011713_16	250	2e-65	ESTs gb|Z34732, gb|R89948 and gb|Z33946 come from this gene [Arabidopsis thaliana]	sp|Q5U241|PD5BB_XENLA	102	2e-21	Sister chromatid cohesion protein PDS5 homolog B-B OS=Xenopus laevis GN=pds5b-b PE=1 SV=2	--	--	--	--	--	K11267	4e-54	207	ath:AT5G47690	sister chromatid cohesion protein PDS5	-	-	GO:0044444//cytoplasmic part
fd_282	--	158	86	63.9859	gi|115489558|ref|NP_001067266.1|	114	3e-25	Os12g0613700 [Oryza sativa Japonica Group] >gi|122203162|sp|Q2QM84.1|ARFY_ORYSJ RecName: Full=Auxin response factor 25; AltName: Full=OsARF6b >gi|113649773|dbj|BAF30285.1| Os12g0613700 [Oryza sativa Japonica Group]	sp|Q2QM84|ARFY_ORYSJ	114	2e-25	Auxin response factor 25 OS=Oryza sativa subsp. japonica GN=ARF25 PE=2 SV=1	--	--	--	--	--	--	--	--	--	--	GO:0010468//regulation of gene expression;GO:0009755//hormone-mediated signaling pathway;GO:0009791//post-embryonic development;GO:0006351//transcription, DNA-dependent	GO:0003676//nucleic acid binding;GO:0005515//protein binding	GO:0043231//intracellular membrane-bounded organelle
fd_283	--	158	13	9.6723	gi|227204305|dbj|BAH57004.1|	114	3e-25	AT3G15980 [Arabidopsis thaliana]	sp|Q8L828|COB23_ARATH	114	1e-25	Coatomer subunit beta'-3 OS=Arabidopsis thaliana GN=At3g15980 PE=2 SV=1	--	--	--	--	--	K05236	5e-07	49.3	cme:CMD156C	coatomer protein complex, subunit alpha (xenin)	GO:0015031//protein transport	GO:0004683//calmodulin-dependent protein kinase activity;GO:0005488//binding	GO:0030120//vesicle coat
fd_284	--	164	22	15.7696	gi|283049400|gb|ADB07168.1|	110	4e-24	DEAD-box RNA helicase-like protein [Prunus persica] >gi|283049402|gb|ADB07169.1| DEAD-box RNA helicase-like protein [Prunus persica]	sp|P35683|IF4A1_ORYSJ	110	3e-24	Eukaryotic initiation factor 4A-1 OS=Oryza sativa subsp. japonica GN=Os06g0701100 PE=2 SV=2	SPAC1006.07	80.1	9e-16	COG0513	Superfamily II DNA and RNA helicases	K03257	1e-25	110	pop:POPTR_645764	translation initiation factor eIF-4A	-	GO:0032559//adenyl ribonucleotide binding;GO:0042623//ATPase activity, coupled	-
fd_285	--	169	8	5.5648	gi|297836032|ref|XP_002885898.1|	75.1	2e-13	S-adenosyl-L-methionine:carboxyl methyltransferase family protein [Arabidopsis lyrata subsp. lyrata] >gi|297331738|gb|EFH62157.1| S-adenosyl-L-methionine:carboxyl methyltransferase family protein [Arabidopsis lyrata subsp. lyrata]	sp|Q9SBK6|JMT_BRARP	71.6	1e-12	Jasmonate O-methyltransferase OS=Brassica rapa subsp. pekinensis GN=JMT PE=1 SV=1	--	--	--	--	--	K08241	3e-13	70.1	ath:AT1G19640	jasmonate O-methyltransferase [EC:2.1.1.141]	-	GO:0008168//methyltransferase activity	-
fd_286	GAAC01000225	656	268	48.0257	gi|11094365|gb|AAG29593.1|AF196286_1	400	1e-111	Ser/Thr specific protein phosphatase 2A A regulatory subunit alpha isoform [Medicago sativa subsp. x varia]	sp|Q38950|2AAB_ARATH	399	1e-110	Serine/threonine-protein phosphatase 2A 65 kDa regulatory subunit A beta isoform OS=Arabidopsis thaliana GN=PP2AA2 PE=1 SV=2	--	--	--	--	--	K03456	2e-117	418	rcu:RCOM_0353450	protein phosphatase 2 (formerly 2A), regulatory subunit A	-	-	-
fd_287	GAAC01000226	398	186	54.938	gi|15218836|ref|NP_176762.1|	89	2e-17	disease resistance-responsive family protein [Arabidopsis thaliana] >gi|6227011|gb|AAF06047.1|AC009513_3 F12P19.3 [Arabidopsis thaliana]	--	--	--	--	--	--	--	--	--	--	--	--	--	--	-	-	GO:0030312//external encapsulating structure
fd_288	GAAC01000227	215	5	2.7339	gi|30725462|gb|AAP37753.1|	108	1e-23	At4g28200 [Arabidopsis thaliana]	sp|O60188|UTP6_SCHPO	55.5	1e-07	U3 small nucleolar RNA-associated protein 6 OS=Schizosaccharomyces pombe GN=utp6 PE=2 SV=1	ECU07g0080	58.5	3e-09	COG5191	Uncharacterized conserved protein, contains HAT (Half-A-TPR) repeat	--	--	--	--	--	GO:0010467//gene expression	-	GO:0044464//cell part
fd_289	GAAC01000228	373	27	8.5094	--	--	--	--	--	--	--	--	--	--	--	--	--	--	--	--	--	--	-	-	-
fd_290	--	160	16	11.7556	gi|297823307|ref|XP_002879536.1|	91.7	2e-18	NPSN11 [Arabidopsis lyrata subsp. lyrata] >gi|297325375|gb|EFH55795.1| NPSN11 [Arabidopsis lyrata subsp. lyrata]	sp|Q944A9|NPS11_ARATH	89.7	5e-18	Novel plant SNARE 11 OS=Arabidopsis thaliana GN=NPSN11 PE=1 SV=1	--	--	--	--	--	K08494	9e-20	91.7	ath:AT2G35190	novel plant SNARE	GO:0051301//cell division	GO:0005515//protein binding	GO:0016020//membrane;GO:0044444//cytoplasmic part
fd_291	GAAC01000229	354	99	32.8757	gi|2191169|gb|AAB61055.1|	115	1e-25	Similar to shaggy related protein kinase. Belongs to the CDC2/CDKX subfamily [Arabidopsis thaliana]	sp|Q39011|KSG7_ARATH	112	7e-25	Shaggy-related protein kinase eta OS=Arabidopsis thaliana GN=ASK7 PE=1 SV=2	SPAC1687.15	97.8	4e-21	COG0515	Serine/threonine protein kinase	K03083	5e-26	112	zma:100283610	glycogen synthase kinase 3 beta [EC:2.7.11.26]	GO:0006464//protein modification process	GO:0005515//protein binding;GO:0004672//protein kinase activity;GO:0032559//adenyl ribonucleotide binding	-
fd_292	GAAC01000230	917	118	15.1271	gi|8778312|gb|AAF79321.1|AC002304_14	511	1e-144	F14J16.20 [Arabidopsis thaliana]	sp|Q54318|HLYC_TREHY	142	3e-33	Hemolysin C OS=Treponema hyodysenteriae GN=tlyC PE=3 SV=1	FN1486	179	6e-45	COG1253	Hemolysins and related proteins containing CBS domains	--	--	--	--	--	-	-	-
fd_293	GAAC01000231	629	357	66.7207	gi|15234480|ref|NP_192395.1|	206	1e-52	DER2.2 (DERLIN-2.2) [Arabidopsis thaliana] >gi|75216465|sp|Q9ZS88.1|DER22_ARATH RecName: Full=Derlin-2.2; AltName: Full=AtDerlin2-2 >gi|14488073|gb|AAK63857.1|AF389284_1 AT4g04860/T4B21_2 [Arabidopsis thaliana] >gi|4115936|gb|AAD03446.1| T4B21.2 gene product [Arabidopsis thaliana] >gi|20147127|gb|AAM10280.1| AT4g04860/T4B21_2 [Arabidopsis thaliana]	sp|Q9ZS88|DER22_ARATH	206	7e-53	Derlin-2.2 OS=Arabidopsis thaliana GN=DER2.2 PE=2 SV=1	ECU11g1920	73.9	2e-13	COG5291	Predicted membrane protein	--	--	--	--	--	-	-	-
fd_294	GAAC01000232	678	154	26.7014	gi|293371445|gb|ADE44160.1|	397	1e-110	acid invertase [Solanum lycopersicum var. cerasiforme]	sp|P29000|INVA_SOLLC	397	3e-110	Acid beta-fructofuranosidase OS=Solanum lycopersicum GN=TIV1 PE=2 SV=1	TM1414	148	9e-36	COG1621	Beta-fructosidases (levanase/invertase)	K01193	2e-104	375	vvi:100241232	beta-fructofuranosidase [EC:3.2.1.26]	-	-	-
fd_295	--	155	167	126.657	gi|1762130|gb|AAB39827.1|	95.5	2e-19	chaperonin-60 beta subunit [Solanum tuberosum]	sp|P21241|RUBB_BRANA	94.4	2e-19	RuBisCO large subunit-binding protein subunit beta, chloroplastic OS=Brassica napus PE=2 SV=1	SMc01758	75.5	2e-14	COG0459	Chaperonin GroEL (HSP60 family)	K04077	5e-20	92.4	osa:4327993	chaperonin GroEL	-	-	-
fd_296	--	152	98	75.7924	gi|182410392|gb|ACB88202.1|	58.2	3e-08	PR1 protein [Solanum lycopersicum]	sp|P04284|PR06_SOLLC	57.8	2e-08	Pathogenesis-related leaf protein 6 OS=Solanum lycopersicum GN=PR1B1 PE=1 SV=2	--	--	--	--	--	K13449	3e-12	66.6	vvi:100258414	pathogenesis-related protein 1	-	-	-
fd_297	GAAC01000233	239	28	13.7722	gi|30689066|ref|NP_194882.2|	120	6e-27	ATEXO70G1 (exocyst subunit EXO70 family protein G1); protein binding [Arabidopsis thaliana] >gi|32347268|gb|AAP31853.1| EXO70-G1 protein [Arabidopsis thaliana]	--	--	--	--	--	--	--	--	--	K07195	2e-28	120	ath:AT4G31540	exocyst complex component 7	-	-	-
fd_298	--	152	8	6.1871	--	--	--	--	--	--	--	--	--	--	--	--	--	--	--	--	--	--	-	-	-
fd_299	GAAC01000234	290	45	18.2414	gi|297852670|ref|XP_002894216.1|	110	5e-24	U-box domain-containing protein [Arabidopsis lyrata subsp. lyrata] >gi|297340058|gb|EFH70475.1| U-box domain-containing protein [Arabidopsis lyrata subsp. lyrata]	sp|Q9FXA4|PUB26_ARATH	110	3e-24	U-box domain-containing protein 26 OS=Arabidopsis thaliana GN=PUB26 PE=2 SV=1	--	--	--	--	--	--	--	--	--	--	-	-	-
fd_300	GAAC01000235	1091	181	19.5028	gi|297834580|ref|XP_002885172.1|	346	3e-94	DEAD-box ATP-dependent RNA helicase 13 [Arabidopsis lyrata subsp. lyrata] >gi|297331012|gb|EFH61431.1| DEAD-box ATP-dependent RNA helicase 13 [Arabidopsis lyrata subsp. lyrata]	sp|Q93Y39|RH13_ARATH	342	2e-93	DEAD-box ATP-dependent RNA helicase 13 OS=Arabidopsis thaliana GN=RH13 PE=2 SV=2	YBR142w	130	4e-30	COG0513	Superfamily II DNA and RNA helicases	K13181	9e-33	137	osa:4352218	ATP-dependent RNA helicase DDX27 [EC:3.6.4.13]	-	-	-
fd_301	--	158	12	8.9283	gi|297802422|ref|XP_002869095.1|	105	2e-22	calcium dependent kinase 5 [Arabidopsis lyrata subsp. lyrata] >gi|297314931|gb|EFH45354.1| calcium dependent kinase 5 [Arabidopsis lyrata subsp. lyrata]	sp|Q38872|CDPK6_ARATH	105	9e-23	Calcium-dependent protein kinase 6 OS=Arabidopsis thaliana GN=CPK6 PE=1 SV=1	--	--	--	--	--	K13412	6e-24	105	vvi:100253693	calcium-dependent protein kinase [EC:2.7.11.1]	-	-	-
fd_302	GAAC01000236	305	15	5.7814	gi|79586698|ref|NP_680116.2|	166	8e-41	REF6 (RELATIVE OF EARLY FLOWERING 6); nucleic acid binding / transcription factor/ zinc ion binding [Arabidopsis thaliana] >gi|50513173|gb|AAT77779.1| relative of early flowering 6 [Arabidopsis thaliana]	sp|Q58DZ6|ZN143_XENTR	79	9e-15	Zinc finger protein 143 OS=Xenopus tropicalis GN=znf143 PE=2 SV=2	SPAC144.09c	52.4	2e-07	COG5048	FOG: Zn-finger	--	--	--	--	--	-	-	-
fd_303	--	163	4	2.8848	--	--	--	--	--	--	--	--	--	--	--	--	--	--	--	--	--	--	-	-	-
fd_304	--	169	19	13.2163	gi|224138238|ref|XP_002322764.1|	53.1	9e-07	white-brown-complex ABC transporter family [Populus trichocarpa] >gi|222867394|gb|EEF04525.1| white-brown-complex ABC transporter family [Populus trichocarpa]	--	--	--	--	--	--	--	--	--	--	--	--	--	--	-	-	-
fd_305	--	161	9	6.5714	gi|195636132|gb|ACG37534.1|	100	5e-21	zinc finger CCHC domain-containing protein 10 [Zea mays]	--	--	--	--	--	--	--	--	--	--	--	--	--	--	-	-	-
fd_306	GAAC01000237	253	28	13.0101	gi|67515338|gb|AAY68198.1|	136	6e-32	RNA polymerase IV second largest subunit [Rhododendron macrophyllum]	--	--	--	--	--	--	--	--	--	K03010	2e-32	133	rcu:RCOM_0920920	DNA-directed RNA polymerase II subunit B [EC:2.7.7.6]	-	-	-
fd_307	GAAC01000238	313	58	21.7835	gi|297597339|ref|NP_001043817.2|	101	3e-21	Os01g0668600 [Oryza sativa Japonica Group] >gi|18461303|dbj|BAB84498.1| S-receptor kinase PK3 precursor-like [Oryza sativa Japonica Group] >gi|20161595|dbj|BAB90516.1| S-receptor kinase PK3 precursor-like [Oryza sativa Japonica Group] >gi|255673536|dbj|BAF05731.2| Os01g0668600 [Oryza sativa Japonica Group]	sp|P17801|KPRO_MAIZE	60.1	4e-09	Putative receptor protein kinase ZmPK1 OS=Zea mays GN=PK1 PE=2 SV=2	--	--	--	--	--	--	--	--	--	--	-	-	-
fd_308	--	152	2	1.5468	gi|115463043|ref|NP_001055121.1|	109	1e-23	Os05g0297900 [Oryza sativa Japonica Group] >gi|113578672|dbj|BAF17035.1| Os05g0297900 [Oryza sativa Japonica Group]	sp|Q9WTR7|SC11C_RAT	65.5	1e-10	Signal peptidase complex catalytic subunit SEC11C OS=Rattus norvegicus GN=Sec11c PE=2 SV=3	--	--	--	--	--	K13280	4e-25	109	osa:4338334	signal peptidase, endoplasmic reticulum-type [EC:3.4.-.-]	-	-	-
fd_309	GAAC01000239	379	40	12.4069	--	--	--	--	--	--	--	--	--	--	--	--	--	--	--	--	--	--	-	-	-
fd_310	GAAC01000240	326	94	33.8964	gi|15231858|ref|NP_188063.1|	95.1	2e-19	CID9 (CTC-Interacting Domain 9); RNA binding / protein binding [Arabidopsis thaliana]	--	--	--	--	--	--	--	--	--	--	--	--	--	--	-	-	-
fd_311	GAAC01000241	593	99	19.6256	gi|56713107|emb|CAH04984.1|	82.4	3e-15	type 1 non-specific lipid transfer protein precursor [Triticum aestivum] >gi|84617199|emb|CAH69195.1| type 1 non specific lipid transfer protein precursor [Triticum aestivum]	sp|P82007|NLTP1_HELAN	75.9	2e-13	Non-specific lipid-transfer protein AP10 OS=Helianthus annuus PE=1 SV=2	--	--	--	--	--	--	--	--	--	--	-	-	-
fd_312	--	188	42	26.2624	gi|67515338|gb|AAY68198.1|	119	1e-26	RNA polymerase IV second largest subunit [Rhododendron macrophyllum]	sp|Q8CFI7|RPB2_MOUSE	51.2	2e-06	DNA-directed RNA polymerase II subunit RPB2 OS=Mus musculus GN=Polr2b PE=2 SV=2	PAB0423	48.9	2e-06	COG0085	DNA-directed RNA polymerase, beta subunit/140 kD subunit	K03010	3e-25	109	vvi:100256013	DNA-directed RNA polymerase II subunit B [EC:2.7.7.6]	-	-	-
fd_313	GAAC01000242	2655	494	21.8729	gi|1173622|gb|AAB37230.1|	1132	0	homeobox protein [Phalaenopsis sp. SM9108]	sp|Q0J9X2|ROC2_ORYSJ	1107	0	Homeobox-leucine zipper protein ROC2 OS=Oryza sativa subsp. japonica GN=ROC2 PE=2 SV=1	ECU03g1170	58.2	7e-08	COG5576	Homeodomain-containing transcription factor	K09338	0	1039	ath:AT4G04890	homeobox-leucine zipper protein	-	-	-
fd_314	--	877	227	30.4277	gi|18423233|ref|NP_568750.1|	269	4e-71	ERD1 (EARLY RESPONSIVE TO DEHYDRATION 1); ATP binding / ATPase/ nucleoside-triphosphatase/ nucleotide binding / protein binding [Arabidopsis thaliana] >gi|1169544|sp|P42762.1|ERD1_ARATH RecName: Full=ERD1 protein, chloroplastic; Flags: Precursor >gi|497629|dbj|BAA04506.1| ERD1 protein [Arabidopsis thaliana] >gi|10177198|dbj|BAB10330.1| Erd1 protein precursor [Arabidopsis thaliana]	sp|P42762|ERD1_ARATH	269	2e-71	ERD1 protein, chloroplastic OS=Arabidopsis thaliana GN=ERD1 PE=2 SV=1	alr2999	190	3e-48	COG0542	ATPases with chaperone activity, ATP-binding subunit	K03696	2e-77	285	rcu:RCOM_1502950	ATP-dependent Clp protease ATP-binding subunit ClpC	-	-	-
fd_315	GAAC01000243	785	192	28.7524	gi|1335862|gb|AAC49294.1|	486	1e-136	clathrin heavy chain [Glycine max]	sp|P11442|CLH_RAT	300	6e-81	Clathrin heavy chain 1 OS=Rattus norvegicus GN=Cltc PE=1 SV=3	--	--	--	--	--	K04646	1e-142	501	rcu:RCOM_0838580	clathrin, heavy polypeptide	-	-	-
fd_316	GAAC01000244	590	82	16.3382	gi|297807463|ref|XP_002871615.1|	146	2e-34	ubiquitin family protein [Arabidopsis lyrata subsp. lyrata] >gi|297317452|gb|EFH47874.1| ubiquitin family protein [Arabidopsis lyrata subsp. lyrata]	--	--	--	--	--	--	--	--	--	--	--	--	--	--	-	-	-
fd_317	GAAC01000245	623	100	18.8693	gi|15220440|ref|NP_172009.1|	248	3e-65	galactosyltransferase family protein [Arabidopsis thaliana] >gi|14488078|gb|AAK63859.1|AF389287_1 At1g05170/YUP8H12_22 [Arabidopsis thaliana] >gi|2388580|gb|AAB71461.1| Similar to Sequence 10 from patent 5477002 (gb|1253956) [Arabidopsis thaliana] >gi|21360399|gb|AAM47315.1| At1g05170/YUP8H12_22 [Arabidopsis thaliana]	sp|A8MRC7|B3GT2_ARATH	243	7e-64	Probable beta-1,3-galactosyltransferase 2 OS=Arabidopsis thaliana GN=B3GALT2 PE=2 SV=1	--	--	--	--	--	--	--	--	--	--	-	-	-
fd_318	GAAC01000246	528	180	40.0758	gi|297806423|ref|XP_002871095.1|	83.6	1e-15	protein binding protein [Arabidopsis lyrata subsp. lyrata] >gi|297316932|gb|EFH47354.1| protein binding protein [Arabidopsis lyrata subsp. lyrata]	--	--	--	--	--	--	--	--	--	K01931	3e-12	68.2	pop:POPTR_879783	protein neuralized	-	-	-
fd_319	GAAC01000247	337	85	29.6505	gi|171187519|gb|ACB41363.1|	76.6	8e-14	ATPase subunit 8 [Mimulus guttatus]	sp|P93303|YMF19_ARATH	69.7	5e-12	ATP synthase protein YMF19 OS=Arabidopsis thaliana GN=YMF19 PE=1 SV=1	--	--	--	--	--	--	--	--	--	--	-	-	-
fd_320	GAAC01000248	232	19	9.6274	--	--	--	--	--	--	--	--	--	--	--	--	--	--	--	--	--	--	-	-	-
fd_321	GAAC01000249	1052	76	8.4926	gi|115466012|ref|NP_001056605.1|	319	1e-101	Os06g0114600 [Oryza sativa Japonica Group] >gi|113594645|dbj|BAF18519.1| Os06g0114600 [Oryza sativa Japonica Group]	sp|Q05AW9|SMG9_XENLA	119	3e-36	Protein SMG9 OS=Xenopus laevis GN=smg9 PE=2 SV=1	--	--	--	--	--	--	--	--	--	--	-	-	-
fd_322	GAAC01000250	480	119	29.144	gi|18403833|ref|NP_566736.1|	210	6e-54	HGL1 (heteroglycan glucosidase 1); hydrolase, hydrolyzing O-glycosyl compounds [Arabidopsis thaliana] >gi|186510357|ref|NP_001118685.1| HGL1 (heteroglycan glucosidase 1); hydrolase, hydrolyzing O-glycosyl compounds [Arabidopsis thaliana] >gi|16648903|gb|AAL24303.1| alpha glucosidase-like protein [Arabidopsis thaliana] >gi|27311799|gb|AAO00865.1| Unknown protein [Arabidopsis thaliana] >gi|31711788…	sp|Q9F234|AGL2_BACTQ	50.1	6e-06	Alpha-glucosidase 2 OS=Bacillus thermoamyloliquefaciens PE=3 SV=1	--	--	--	--	--	--	--	--	--	--	-	-	-
fd_323	GAAC01000251	344	32	10.9354	--	--	--	--	--	--	--	--	--	--	--	--	--	--	--	--	--	--	-	-	-
fd_324	GAAC01000252	545	177	38.1786	gi|297595965|ref|NP_001041839.2|	254	5e-67	Os01g0115900 [Oryza sativa Japonica Group] >gi|255672800|dbj|BAF03753.2| Os01g0115900 [Oryza sativa Japonica Group]	sp|Q9FID5|Y5393_ARATH	217	4e-56	Probable receptor-like protein kinase At5g39030 OS=Arabidopsis thaliana GN=At5g39030 PE=2 SV=1	CAC1728_1	82.8	3e-16	COG0515	Serine/threonine protein kinase	K13430	3e-32	134	zma:100283091	serine/threonine-protein kinase PBS1 [EC:2.7.11.1]	-	-	-
fd_325	GAAC01000253	827	122	17.3419	gi|115434700|ref|NP_001042108.1|	407	1e-112	Os01g0165100 [Oryza sativa Japonica Group] >gi|113531639|dbj|BAF04022.1| Os01g0165100 [Oryza sativa Japonica Group]	--	--	--	--	--	--	--	--	--	--	--	--	--	--	-	-	-
fd_326	GAAC01000254	1049	178	19.9475	gi|224090059|ref|XP_002308925.1|	313	2e-84	chromatin remodeling complex subunit [Populus trichocarpa] >gi|222854901|gb|EEE92448.1| chromatin remodeling complex subunit [Populus trichocarpa]	sp|Q8RXS6|INO80_ARATH	264	7e-70	DNA helicase INO80 complex homolog 1 OS=Arabidopsis thaliana GN=INO80 PE=2 SV=2	ECU09g1890	124	2e-28	COG0553	Superfamily II DNA/RNA helicases, SNF2 family	K11665	7e-93	337	vvi:100250397	DNA helicase INO80 [EC:3.6.1.-]	-	-	-
fd_327	GAAC01000255	263	24	10.7275	gi|255543202|ref|XP_002512664.1|	49.7	4e-07	hypothetical protein RCOM_1438220 [Ricinus communis] >gi|223548625|gb|EEF50116.1| hypothetical protein RCOM_1438220 [Ricinus communis]	sp|Q90370|MAFB_COTJA	33.1	3e-07	Transcription factor MafB OS=Coturnix coturnix japonica GN=MAFB PE=1 SV=1	--	--	--	--	--	--	--	--	--	--	-	-	-
fd_328	GAAC01000256	230	27	13.8	gi|297842739|ref|XP_002889251.1|	136	6e-32	GAPCP-1 [Arabidopsis lyrata subsp. lyrata] >gi|297335092|gb|EFH65510.1| GAPCP-1 [Arabidopsis lyrata subsp. lyrata]	sp|Q42671|G3PC_CRAPL	129	7e-30	Glyceraldehyde-3-phosphate dehydrogenase, cytosolic OS=Craterostigma plantagineum GN=GAPC PE=2 SV=1	SPBC354.12	117	5e-27	COG0057	Glyceraldehyde-3-phosphate dehydrogenase/erythrose-4-phosphate dehydrogenase	K00134	3e-35	143	pop:POPTR_832627	glyceraldehyde 3-phosphate dehydrogenase [EC:1.2.1.12]	-	-	-
fd_329	GAAC01000257	588	35	6.9974	gi|109676362|gb|ABG37663.1|	175	4e-43	CCHC-type integrase [Populus trichocarpa]	sp|P17840|SLSG3_BRAOL	71.6	3e-12	S-locus-specific glycoprotein S13 OS=Brassica oleracea GN=SLSG PE=2 SV=2	--	--	--	--	--	--	--	--	--	--	-	-	-
fd_330	GAAC01000258	994	238	28.1471	gi|17064766|gb|AAL32537.1|	324	1e-87	Unknown protein [Arabidopsis thaliana] >gi|23197816|gb|AAN15435.1| Unknown protein [Arabidopsis thaliana]	sp|Q39008|M3K1_ARATH	324	7e-88	Mitogen-activated protein kinase kinase kinase 1 OS=Arabidopsis thaliana GN=MEKK1 PE=1 SV=2	YAR019c	140	3e-33	COG0515	Serine/threonine protein kinase	K13414	5e-105	377	pop:POPTR_1078383	mitogen-activated protein kinase kinase kinase 1, plant [EC:2.7.11.25]	-	-	-
fd_331	GAAC01000259	266	33	14.584	gi|146760217|emb|CAM58984.1|	128	2e-29	beta tubulin 6 [Hordeum vulgare subsp. vulgare]	sp|Q41785|TBB8_MAIZE	128	1e-29	Tubulin beta-8 chain OS=Zea mays GN=TUBB8 PE=2 SV=1	ECU03g0820i	99	2e-21	COG5023	Tubulin	K07375	9e-31	128	zma:542418	tubulin beta	-	-	-
fd_332	GAAC01000260	574	32	6.5536	gi|297833742|ref|XP_002884753.1|	110	1e-35	zinc finger family protein [Arabidopsis lyrata subsp. lyrata] >gi|297330593|gb|EFH61012.1| zinc finger family protein [Arabidopsis lyrata subsp. lyrata]	--	--	--	--	--	--	--	--	--	--	--	--	--	--	-	-	-
fd_333	GAAC01000261	887	433	57.3862	gi|297805364|ref|XP_002870566.1|	270	2e-71	kinase family protein [Arabidopsis lyrata subsp. lyrata] >gi|297316402|gb|EFH46825.1| kinase family protein [Arabidopsis lyrata subsp. lyrata]	sp|Q8H199|CRK14_ARATH	74.7	8e-13	Cysteine-rich receptor-like protein kinase 14 OS=Arabidopsis thaliana GN=CRK14 PE=2 SV=2	--	--	--	--	--	K13430	2e-13	73.6	zma:100283091	serine/threonine-protein kinase PBS1 [EC:2.7.11.1]	-	-	-
fd_334	GAAC01000262	490	23	5.5179	gi|225433249|ref|XP_002282057.1|	79.7	1e-14	PREDICTED: hypothetical protein [Vitis vinifera]	--	--	--	--	--	--	--	--	--	--	--	--	--	--	-	-	-
fd_335	GAAC01000263	1334	253	22.295	gi|297849756|ref|XP_002892759.1|	474	1e-133	F-box family protein [Arabidopsis lyrata subsp. lyrata] >gi|297338601|gb|EFH69018.1| F-box family protein [Arabidopsis lyrata subsp. lyrata]	sp|Q9FZ70|FDL1_ARATH	461	5e-129	F-box/FBD/LRR-repeat protein At1g13570 OS=Arabidopsis thaliana GN=At1g13570 PE=2 SV=1	--	--	--	--	--	--	--	--	--	--	-	-	-
fd_336	GAAC01000264	851	128	17.6817	gi|6520148|dbj|BAA87937.1|	65.5	8e-10	ZW10 [Arabidopsis thaliana]	--	--	--	--	--	--	--	--	--	--	--	--	--	--	-	-	-
fd_337	GAAC01000265	467	83	20.8932	gi|115646756|gb|ABJ17107.1|	209	1e-53	At5g19380 [Arabidopsis thaliana]	sp|Q55C66|CRTP3_DICDI	76.6	6e-14	Crt homolog 3 OS=Dictyostelium discoideum GN=crtp3 PE=3 SV=1	--	--	--	--	--	--	--	--	--	--	-	-	-
fd_338	--	532	32	7.071	gi|16648783|gb|AAL25582.1|	132	2e-30	AT5g13100/T19L5_60 [Arabidopsis thaliana] >gi|56381999|gb|AAV85718.1| At5g13100 [Arabidopsis thaliana]	--	--	--	--	--	--	--	--	--	--	--	--	--	--	-	-	-
fd_339	GAAC01000266	421	50	13.9615	gi|15233732|ref|NP_195531.1|	90.5	5e-18	FRS5 (FAR1-related sequence 5); zinc ion binding [Arabidopsis thaliana] >gi|75213627|sp|Q9SZL8.1|FRS5_ARATH RecName: Full=Protein FAR1-RELATED SEQUENCE 5	sp|Q9SZL8|FRS5_ARATH	90.5	3e-18	Protein FAR1-RELATED SEQUENCE 5 OS=Arabidopsis thaliana GN=FRS5 PE=2 SV=1	--	--	--	--	--	--	--	--	--	--	-	-	-
fd_340	GAAC01000267	269	13	5.6811	gi|79512687|ref|NP_196834.3|	166	6e-41	SFC (SCARFACE); ARF GTPase activator/ phosphoinositide binding [Arabidopsis thaliana] >gi|75321812|sp|Q5W7F2.1|AGD3_ARATH RecName: Full=ADP-ribosylation factor GTPase-activating protein AGD3; Short=ARF GAP AGD3; AltName: Full=Protein ARF-GAP DOMAIN 3; Short=AtAGD3; AltName: Full=Protein VASCULAR NETWORK 3; AltName: Full=Protein SCARFACE >gi|55583334|dbj|BAD69588.1| ARF-GAP [Arabidopsis thaliana]	sp|Q5W7F2|AGD3_ARATH	166	3e-41	ADP-ribosylation factor GTPase-activating protein AGD3 OS=Arabidopsis thaliana GN=AGD3 PE=1 SV=1	--	--	--	--	--	K12489	2e-45	176	pop:POPTR_554695	Arf-GAP with coiled-coil, ANK repeat and PH domain-containing protein	-	-	-
fd_341	GAAC01000268	252	16	7.4638	gi|116560816|gb|ABJ99598.1|	60.5	6e-09	NBS-LRR type resistance protein [Beta vulgaris]	--	--	--	--	--	--	--	--	--	--	--	--	--	--	-	-	-
fd_342	--	185	90	57.1892	gi|115466296|ref|NP_001056747.1|	80.9	4e-15	Os06g0139800 [Oryza sativa Japonica Group] >gi|113594787|dbj|BAF18661.1| Os06g0139800 [Oryza sativa Japonica Group]	sp|P27061|PPA1_SOLLC	67.4	3e-11	Acid phosphatase 1 OS=Solanum lycopersicum GN=APS1 PE=2 SV=1	--	--	--	--	--	K02866	6e-06	45.8	osa:4332737	large subunit ribosomal protein L10e	-	-	-
fd_343	GAAC01000269	317	60	22.2503	gi|2674203|gb|AAB88706.1|	166	7e-41	CLP protease regulatory subunit CLPX [Arabidopsis thaliana]	sp|B7KBH7|CLPX_CYAP7	134	2e-31	ATP-dependent Clp protease ATP-binding subunit clpX OS=Cyanothece sp. (strain PCC 7424) GN=clpX PE=3 SV=1	FN2015	132	1e-31	COG1219	ATP-dependent protease Clp, ATPase subunit	K03544	1e-45	177	rcu:RCOM_1242470	ATP-dependent Clp protease ATP-binding subunit ClpX	-	-	-
fd_344	--	154	1	0.7633	gi|75755942|gb|ABA27027.1|	56.6	8e-08	TO70-3 [Taraxacum officinale]	--	--	--	--	--	--	--	--	--	--	--	--	--	--	-	-	-
fd_345	--	159	86	63.5835	--	--	--	--	--	--	--	--	--	--	--	--	--	--	--	--	--	--	-	-	-
fd_346	GAAC01000270	340	96	33.1922	gi|14486705|gb|AAK63247.1|AF367433_1	71.2	3e-12	phosphatidylinositol transfer-like protein III [Lotus japonicus]	--	--	--	--	--	--	--	--	--	--	--	--	--	--	-	-	-
fd_347	--	186	5	3.1601	--	--	--	--	--	--	--	--	--	--	--	--	--	--	--	--	--	--	-	-	-
fd_348	GAAC01000271	1008	393	45.8327	gi|42559164|sp|O80360.1|RK3_TOBAC	281	1e-106	RecName: Full=50S ribosomal protein L3, chloroplastic; Flags: Precursor >gi|189096128|pdb|3BBO|F Chain F, Homology Model For The Spinach Chloroplast 50s Subunit Fitted To 9.4a Cryo-Em Map Of The 70s Chlororibosome >gi|3298437|dbj|BAA31509.1| chloroplast ribosomal protein L3 [Nicotiana tabacum]	sp|O80360|RK3_TOBAC	281	2e-106	50S ribosomal protein L3, chloroplastic (Fragment) OS=Nicotiana tabacum GN=RPL3 PE=1 SV=1	sll1799	154	2e-54	COG0087	Ribosomal protein L3	K02906	2e-108	283	vvi:100267754	large subunit ribosomal protein L3	-	-	-
fd_349	GAAC01000272	204	34	19.5926	--	--	--	--	--	--	--	--	--	--	--	--	--	--	--	--	--	--	-	-	-
fd_350	GAAC01000273	237	15	7.4402	gi|29028882|gb|AAO64820.1|	98.2	3e-20	At3g49990 [Arabidopsis thaliana]	--	--	--	--	--	--	--	--	--	--	--	--	--	--	-	-	-
fd_351	GAAC01000274	227	93	48.1615	gi|3818416|gb|AAD03487.1|	114	4e-25	proline-rich cell wall protein [Medicago sativa]	sp|Q00451|PRF1_SOLLC	105	9e-23	36.4 kDa proline-rich protein OS=Solanum lycopersicum GN=TPRP-F1 PE=2 SV=1	CC3494_1	50.4	8e-07	COG3637	Opacity protein and related surface antigens	K08874	2e-06	47.8	cre:CHLREDRAFT_141477	transformation/transcription domain-associated protein	-	-	-
fd_352	GAAC01000275	300	64	25.0785	gi|9759112|dbj|BAB09597.1|	128	2e-29	low density lipoprotein B-like protein [Arabidopsis thaliana]	--	--	--	--	--	--	--	--	--	--	--	--	--	--	-	-	-
fd_353	--	384	10	3.0613	gi|186510270|ref|NP_188725.2|	50.8	5e-06	RNA binding / nucleic acid binding / nucleotide binding [Arabidopsis thaliana]	--	--	--	--	--	--	--	--	--	--	--	--	--	--	-	-	-
fd_354	GAAC01000276	483	104	25.3122	gi|18409248|ref|NP_564960.1|	141	1e-59	appr-1-p processing enzyme family protein [Arabidopsis thaliana] >gi|13937139|gb|AAK50063.1|AF372923_1 At1g69340/F10D13.28 [Arabidopsis thaliana] >gi|27363414|gb|AAO11626.1| At1g69340/F10D13.28 [Arabidopsis thaliana]	sp|Q66HX8|GDAP2_DANRE	43.5	3e-08	Ganglioside-induced differentiation-associated protein 2 OS=Danio rerio GN=gdap2 PE=2 SV=1	--	--	--	--	--	--	--	--	--	--	-	-	-
fd_355	GAAC01000277	1146	288	29.5428	gi|11612392|gb|AAG39222.1|AF253511_1	269	1e-107	anther ethylene-upregulated protein ER1 [Nicotiana tabacum]	sp|Q6NPP4|CMTA2_ARATH	228	3e-87	Calmodulin-binding transcription activator 2 OS=Arabidopsis thaliana GN=CMTA2 PE=1 SV=1	--	--	--	--	--	--	--	--	--	--	-	-	-
fd_356	GAAC01000278	846	113	15.7019	gi|186522071|ref|NP_850807.2|	528	1e-149	ATP binding / ATP-dependent helicase/ helicase/ nucleic acid binding [Arabidopsis thaliana]	sp|Q9LFN6|RH56_ARATH	528	2e-149	DEAD-box ATP-dependent RNA helicase 56 OS=Arabidopsis thaliana GN=RH56 PE=2 SV=2	SPAC17G6.14c	410	1e-114	COG0513	Superfamily II DNA and RNA helicases	K12812	8e-155	542	vvi:100250852	ATP-dependent RNA helicase UAP56/SUB2 [EC:3.6.4.13]	-	-	-
fd_357	GAAC01000279	868	173	23.4299	gi|224092566|ref|XP_002309665.1|	536	1e-151	chromatin remodeling complex subunit [Populus trichocarpa] >gi|222855641|gb|EEE93188.1| chromatin remodeling complex subunit [Populus trichocarpa]	sp|Q9S775|PKL_ARATH	508	2e-143	CHD3-type chromatin-remodeling factor PICKLE OS=Arabidopsis thaliana GN=PKL PE=1 SV=1	YER164w	226	4e-59	COG0553	Superfamily II DNA/RNA helicases, SNF2 family	K11643	2e-144	508	ath:AT2G25170	chromodomain-helicase-DNA-binding protein 4 [EC:3.6.1.-]	-	-	-
fd_358	--	169	113	78.6022	gi|224082450|ref|XP_002306697.1|	106	9e-23	f-box family protein [Populus trichocarpa] >gi|222856146|gb|EEE93693.1| f-box family protein [Populus trichocarpa]	sp|Q9FRH7|TLP10_ARATH	99.8	5e-21	Tubby-like F-box protein 10 OS=Arabidopsis thaliana GN=TULP10 PE=1 SV=1	--	--	--	--	--	--	--	--	--	--	-	-	-
fd_359	GAAC01000280	925	578	73.4563	gi|297846792|ref|XP_002891277.1|	294	1e-78	transcription factor [Arabidopsis lyrata subsp. lyrata] >gi|297337119|gb|EFH67536.1| transcription factor [Arabidopsis lyrata subsp. lyrata]	sp|Q3SWZ6|SBDS_BOVIN	72	5e-12	Ribosome maturation protein SBDS OS=Bos taurus GN=SBDS PE=2 SV=1	--	--	--	--	--	--	--	--	--	--	-	-	-
fd_360	GAAC01000281	325	88	31.8304	gi|14517816|gb|AAK64378.1|AF366901_1	62	2e-09	phosphatidylinositol transfer-like protein II [Lotus japonicus]	--	--	--	--	--	--	--	--	--	--	--	--	--	--	-	-	-
fd_361	GAAC01000282	1753	393	26.3544	gi|109946637|gb|ABG48497.1|	440	1e-122	At1g77890 [Arabidopsis thaliana]	--	--	--	--	--	--	--	--	--	--	--	--	--	--	-	-	-
fd_362	GAAC01000283	506	161	37.404	gi|297829912|ref|XP_002882838.1|	312	1e-84	kinase family protein [Arabidopsis lyrata subsp. lyrata] >gi|297328678|gb|EFH59097.1| kinase family protein [Arabidopsis lyrata subsp. lyrata]	sp|P40234|CKI2_SCHPO	120	4e-27	Casein kinase I homolog 2 OS=Schizosaccharomyces pombe GN=cki2 PE=1 SV=2	Rv1746	48.9	4e-06	COG0515	Serine/threonine protein kinase	K08282	2e-29	124	cme:CMF099C	non-specific serine/threonine protein kinase [EC:2.7.11.1]	-	-	-
fd_363	GAAC01000284	786	145	21.6865	gi|19920113|gb|AAM08545.1|AC079935_17	392	1e-108	Putative pyridoxamine 5-phosphate oxidase [Oryza sativa Japonica Group]	sp|Q7VU72|PDXH_BORPE	235	3e-61	Pyridoxine/pyridoxamine 5'-phosphate oxidase OS=Bordetella pertussis GN=pdxH PE=3 SV=1	all1248	210	2e-54	COG0259	Pyridoxamine-phosphate oxidase	--	--	--	--	--	-	-	-
fd_364	GAAC01000285	344	81	27.6802	gi|297597754|ref|NP_001044475.2|	135	2e-31	Os01g0786900 [Oryza sativa Japonica Group] >gi|255673762|dbj|BAF06389.2| Os01g0786900 [Oryza sativa Japonica Group]	--	--	--	--	--	--	--	--	--	--	--	--	--	--	-	-	-
fd_365	GAAC01000286	229	0	0	gi|145334853|ref|NP_001078772.1|	73.2	9e-13	ZEU1 (ZEUS1); ATP binding / thymidylate kinase [Arabidopsis thaliana]	sp|P36590|KTHY_SCHPO	52.8	7e-07	Thymidylate kinase OS=Schizosaccharomyces pombe GN=tmp1 PE=2 SV=2	SPCC70.07c	52.8	2e-07	COG0125	Thymidylate kinase	K00943	2e-14	74.3	vvi:100245592	dTMP kinase [EC:2.7.4.9]	-	-	-
fd_366	--	162	7	5.0796	--	--	--	--	--	--	--	--	--	--	--	--	--	--	--	--	--	--	-	-	-
fd_367	GAAC01000287	301	17	6.6394	gi|149938956|gb|ABR45723.1|	95.9	1e-19	GDH1 [Actinidia chinensis]	sp|Q9LEC8|DHEB_NICPL	95.1	1e-19	Glutamate dehydrogenase B OS=Nicotiana plumbaginifolia GN=GDHB PE=2 SV=1	SSO1930	64.7	4e-11	COG0334	Glutamate dehydrogenase/leucine dehydrogenase	K00261	8e-21	95.1	pop:POPTR_826140	glutamate dehydrogenase (NAD(P)+) [EC:1.4.1.3]	-	-	-
fd_368	GAAC01000288	953	137	16.8994	gi|18419996|ref|NP_568019.1|	234	9e-61	tetratricopeptide repeat (TPR)-containing protein [Arabidopsis thaliana]	--	--	--	--	--	--	--	--	--	--	--	--	--	--	-	-	-
fd_369	GAAC01000289	216	7	3.8097	--	--	--	--	--	--	--	--	--	--	--	--	--	--	--	--	--	--	-	-	-
fd_370	GAAC01000290	512	54	12.3984	gi|115451649|ref|NP_001049425.1|	245	2e-64	Os03g0223700 [Oryza sativa Japonica Group] >gi|108706923|gb|ABF94718.1| HEAT repeat family protein, expressed [Oryza sativa (japonica cultivar-group)] >gi|113547896|dbj|BAF11339.1| Os03g0223700 [Oryza sativa Japonica Group]	sp|Q66L58|VAC14_DANRE	142	1e-33	Protein VAC14 homolog OS=Danio rerio GN=vac14 PE=2 SV=1	--	--	--	--	--	--	--	--	--	--	-	-	-
fd_371	GAAC01000291	957	237	29.1125	gi|24817248|emb|CAD56216.1|	502	1e-141	transportin-like protein [Cicer arietinum]	sp|Q8BFY9|TNPO1_MOUSE	242	3e-63	Transportin-1 OS=Mus musculus GN=Tnpo1 PE=1 SV=2	--	--	--	--	--	--	--	--	--	--	-	-	-
fd_372	GAAC01000292	1370	317	27.2008	gi|115449221|ref|NP_001048390.1|	426	1e-118	Os02g0796600 [Oryza sativa Japonica Group] >gi|113537921|dbj|BAF10304.1| Os02g0796600 [Oryza sativa Japonica Group]	sp|Q7ZVZ7|F108C_DANRE	238	6e-62	Abhydrolase domain-containing protein FAM108C1 OS=Danio rerio GN=fam108c1 PE=2 SV=1	all8511	159	1e-38	COG1073	Hydrolases of the alpha/beta superfamily	K06889	3e-11	67	cme:CMQ233C		-	-	-
fd_373	GAAC01000293	365	57	18.358	gi|21779966|gb|AAM77595.1|AF507018_1	187	4e-47	auxin transport protein [Arabidopsis thaliana]	sp|Q54QG5|Y3893_DICDI	52.4	9e-07	Probable E3 ubiquitin-protein ligase DDB_G0283893 OS=Dictyostelium discoideum GN=DDB_G0283893 PE=3 SV=2	--	--	--	--	--	K10691	2e-51	196	pop:POPTR_673088	E3 ubiquitin-protein ligase UBR4 [EC:6.3.2.19]	-	-	-
fd_374	GAAC01000294	413	65	18.5015	--	--	--	--	--	--	--	--	--	--	--	--	--	--	--	--	--	--	-	-	-
fd_375	GAAC01000295	1421	303	25.0664	gi|79316393|ref|NP_001030945.1|	518	1e-146	ATMAP65-6; microtubule binding [Arabidopsis thaliana]	sp|Q9HDY1|ASE1_SCHPO	59.7	5e-08	Anaphase spindle elongation protein 1 OS=Schizosaccharomyces pombe GN=ase1 PE=1 SV=1	--	--	--	--	--	--	--	--	--	--	-	-	-
fd_376	GAAC01000296	642	146	26.7338	gi|297839899|ref|XP_002887831.1|	122	3e-27	EMB2753 [Arabidopsis lyrata subsp. lyrata] >gi|297333672|gb|EFH64090.1| EMB2753 [Arabidopsis lyrata subsp. lyrata]	--	--	--	--	--	--	--	--	--	--	--	--	--	--	-	-	-
fd_377	GAAC01000297	219	29	15.5667	gi|21105740|gb|AAM34769.1|AF509869_1	71.6	2e-12	nam-like protein 6 [Petunia x hybrida]	--	--	--	--	--	--	--	--	--	--	--	--	--	--	-	-	-
fd_378	GAAC01000298	474	96	23.8087	gi|297599741|ref|NP_001047717.2|	177	4e-44	Os02g0674700 [Oryza sativa Japonica Group] >gi|255671161|dbj|BAF09631.2| Os02g0674700 [Oryza sativa Japonica Group]	sp|Q9LN71|RING1_ARATH	172	8e-43	E3 ubiquitin-protein ligase At1g12760 OS=Arabidopsis thaliana GN=At1g12760 PE=2 SV=1	--	--	--	--	--	K13148	5e-34	140	rcu:RCOM_0598050	integrator complex subunit 11 [EC:3.1.27.-]	-	-	-
fd_379	GAAC01000299	459	110	28.1724	gi|253741123|gb|ACT34898.1|	158	2e-38	GT3 [Medicago truncatula]	sp|Q8H0F2|ANGT_GENTR	110	3e-24	Anthocyanin 3'-O-beta-glucosyltransferase OS=Gentiana triflora PE=1 SV=1	SPBC28F2.12	63.5	1e-10	COG0086	DNA-directed RNA polymerase, beta' subunit/160 kD subunit	K13496	4e-22	100	ath:AT2G36750	UDP-glucosyl transferase 73C [EC:2.4.1.-]	-	-	-
fd_380	GAAC01000300	227	12	6.2144	gi|224114215|ref|XP_002316699.1|	70.9	4e-12	predicted protein [Populus trichocarpa] >gi|222859764|gb|EEE97311.1| predicted protein [Populus trichocarpa]	--	--	--	--	--	--	--	--	--	--	--	--	--	--	-	-	-
fd_381	GAAC01000301	1346	203	17.7294	gi|30686898|ref|NP_188947.2|	622	1e-177	RNA binding [Arabidopsis thaliana]	sp|Q9FYT6|CRS1_MAIZE	317	1e-85	Chloroplastic group IIA intron splicing facilitator CRS1, chloroplastic OS=Zea mays GN=CRS1 PE=1 SV=1	--	--	--	--	--	--	--	--	--	--	-	-	-
fd_382	GAAC01000302	509	62	14.3191	gi|225436069|ref|XP_002272311.1|	78.6	3e-14	PREDICTED: similar to Hsp20/alpha crystallin family protein [Vitis vinifera]	--	--	--	--	--	--	--	--	--	--	--	--	--	--	-	-	-
fd_383	GAAC01000303	444	289	76.517	gi|162459521|ref|NP_001104947.1|	124	4e-28	methylenetetrahydrofolate reductase 1 [Zea mays] >gi|75313356|sp|Q9SE94.1|MTHR1_MAIZE RecName: Full=Methylenetetrahydrofolate reductase 1; AltName: Full=ZmMTHFR1 >gi|5802606|gb|AAD51733.1|AF174486_1 methylenetetrahydrofolate reductase [Zea mays]	sp|Q9SE94|MTHR1_MAIZE	124	3e-28	Methylenetetrahydrofolate reductase 1 OS=Zea mays PE=2 SV=1	SPAC56F8.10	73.9	9e-14	COG0685	5,10-methylenetetrahydrofolate reductase	K00297	4e-29	123	osa:4334554	methylenetetrahydrofolate reductase (NADPH) [EC:1.5.1.20]	-	-	-
fd_384	--	171	3	2.0624	gi|225442633|ref|XP_002284593.1|	92.4	1e-18	PREDICTED: similar to BY-2 kinesin-like protein 10 [Vitis vinifera]	--	--	--	--	--	--	--	--	--	K10393	3e-22	100	rcu:RCOM_1494510	kinesin family member 2/24	-	-	-
fd_385	GAAC01000304	1698	324	22.4311	gi|7211986|gb|AAF40457.1|AC004809_15	134	4e-30	Contains similarity to the regulatory protein (G1) gb|M97204 goliath from D. melanogaster. EST gb|T76547 comes from this gene [Arabidopsis thaliana]	--	--	--	--	--	--	--	--	--	--	--	--	--	--	-	-	-
fd_386	GAAC01000305	266	14	6.1871	gi|79512687|ref|NP_196834.3|	152	1e-36	SFC (SCARFACE); ARF GTPase activator/ phosphoinositide binding [Arabidopsis thaliana] >gi|75321812|sp|Q5W7F2.1|AGD3_ARATH RecName: Full=ADP-ribosylation factor GTPase-activating protein AGD3; Short=ARF GAP AGD3; AltName: Full=Protein ARF-GAP DOMAIN 3; Short=AtAGD3; AltName: Full=Protein VASCULAR NETWORK 3; AltName: Full=Protein SCARFACE >gi|55583334|dbj|BAD69588.1| ARF-GAP [Arabidopsis thaliana]	sp|Q5W7F2|AGD3_ARATH	152	6e-37	ADP-ribosylation factor GTPase-activating protein AGD3 OS=Arabidopsis thaliana GN=AGD3 PE=1 SV=1	--	--	--	--	--	K12489	1e-37	150	pop:POPTR_554695	Arf-GAP with coiled-coil, ANK repeat and PH domain-containing protein	-	-	-
fd_387	GAAC01000306	203	5	2.8955	--	--	--	--	--	--	--	--	--	--	--	--	--	--	--	--	--	--	-	-	-
fd_388	GAAC01000307	244	28	13.49	gi|224111430|ref|XP_002315852.1|	107	5e-23	type-b response regulator [Populus trichocarpa] >gi|222864892|gb|EEF02023.1| type-b response regulator [Populus trichocarpa]	sp|Q9ZWJ9|ARR2_ARATH	60.1	4e-09	Two-component response regulator ARR2 OS=Arabidopsis thaliana GN=ARR2 PE=1 SV=1	--	--	--	--	--	--	--	--	--	--	-	-	-
fd_389	GAAC01000308	545	132	28.4722	gi|18086414|gb|AAL57664.1|	363	1e-100	At2g16090/F7H1.11 [Arabidopsis thaliana] >gi|20855959|gb|AAM26640.1| At2g16090/F7H1.11 [Arabidopsis thaliana]	sp|Q84RR2|ARI2_ARATH	363	3e-100	Probable E3 ubiquitin-protein ligase ARI2 OS=Arabidopsis thaliana GN=ARI2 PE=2 SV=1	--	--	--	--	--	K11968	2e-109	391	rcu:RCOM_0938350	ariadne-1	-	-	-
fd_390	GAAC01000309	1065	285	31.4585	gi|51477379|gb|AAU04752.1|	471	1e-132	DRP [Cucumis melo]	sp|Q9LQ55|DRP2B_ARATH	462	1e-129	Dynamin-2B OS=Arabidopsis thaliana GN=DRP2B PE=1 SV=2	SPAC767.01c	74.7	3e-13	COG0699	Predicted GTPases (dynamin-related)	K01528	1e-12	71.2	osa:4327743	dynamin GTPase [EC:3.6.5.5]	-	-	-
fd_391	GAAC01000310	1344	189	16.5313	gi|224122778|ref|XP_002330477.1|	404	0	histone acetyltransferase [Populus trichocarpa] >gi|222871889|gb|EEF09020.1| histone acetyltransferase [Populus trichocarpa]	sp|Q9C5X9|HAC1_ARATH	392	1e-152	Histone acetyltransferase HAC1 OS=Arabidopsis thaliana GN=HAC1 PE=1 SV=1	--	--	--	--	--	K04498	0	413	vvi:100251243	E1A/CREB-binding protein [EC:2.3.1.48]	-	-	-
fd_392	GAAC01000311	203	15	8.6864	--	--	--	--	--	--	--	--	--	--	--	--	--	--	--	--	--	--	-	-	-
fd_393	GAAC01000312	688	195	33.3188	gi|15219848|ref|NP_176297.1|	358	2e-98	CPSF73-I (CLEAVAGE AND POLYADENYLATION SPECIFICITY FACTOR 73-I); protein binding [Arabidopsis thaliana] >gi|30696512|ref|NP_849835.1| CPSF73-I (CLEAVAGE AND POLYADENYLATION SPECIFICITY FACTOR 73-I); protein binding [Arabidopsis thaliana] >gi|79320389|ref|NP_001031215.1| CPSF73-I (CLEAVAGE AND POLYADENYLATION SPECIFICITY FACTOR 73-I); protein binding [Arabidopsis thaliana] >gi|75262219|sp|Q9C952.1…	sp|Q9C952|CPSF3_ARATH	358	1e-98	Cleavage and polyadenylation specificity factor subunit 3-I OS=Arabidopsis thaliana GN=CPSF73-I PE=1 SV=1	SPAC17G6.16c_1	64.7	1e-10	COG1236	Predicted exonuclease of the beta-lactamase fold involved in RNA processing	--	--	--	--	--	-	-	-
fd_394	GAAC01000313	213	38	20.9724	gi|115448251|ref|NP_001047905.1|	118	2e-26	Os02g0712000 [Oryza sativa Japonica Group] >gi|41052655|dbj|BAD07503.1| DegP protease-like [Oryza sativa Japonica Group] >gi|113537436|dbj|BAF09819.1| Os02g0712000 [Oryza sativa Japonica Group]	sp|Q8RY22|DEGP7_ARATH	111	1e-24	Protease Do-like 7 OS=Arabidopsis thaliana GN=DEGP7 PE=2 SV=1	--	--	--	--	--	--	--	--	--	--	-	-	-
fd_395	GAAC01000314	391	48	14.4314	gi|190886513|gb|ACE95179.1|	120	5e-27	At1g17730 [Arabidopsis thaliana]	--	--	--	--	--	--	--	--	--	--	--	--	--	--	-	-	-
fd_396	GAAC01000315	1235	163	15.5154	gi|115466786|ref|NP_001056992.1|	363	2e-99	Os06g0184300 [Oryza sativa Japonica Group] >gi|113595032|dbj|BAF18906.1| Os06g0184300 [Oryza sativa Japonica Group]	sp|Q9FPS4|UBP23_ARATH	349	3e-95	Ubiquitin carboxyl-terminal hydrolase 23 OS=Arabidopsis thaliana GN=UBP23 PE=2 SV=2	YMR304w	82	2e-15	COG5077	Ubiquitin carboxyl-terminal hydrolase	K11855	7e-135	477	vvi:100246880	ubiquitin carboxyl-terminal hydrolase 36/42 [EC:3.1.2.15]	-	-	-
fd_397	GAAC01000316	375	19	5.9561	gi|109946617|gb|ABG48487.1|	68.2	3e-11	At4g00770 [Arabidopsis thaliana]	--	--	--	--	--	--	--	--	--	--	--	--	--	--	-	-	-
fd_398	GAAC01000317	313	81	30.4217	gi|212286414|dbj|BAG82869.1|	199	8e-51	casein kinase II alpha subunit [Oryza brachyantha]	sp|P28523|CSK2A_MAIZE	199	4e-51	Casein kinase II subunit alpha OS=Zea mays GN=ACK2 PE=1 SV=1	--	--	--	--	--	K03097	2e-55	209	pop:POPTR_1073670	casein kinase 2, alpha polypeptide [EC:2.7.11.1]	-	-	-
fd_399	GAAC01000318	284	198	81.9577	gi|7527720|gb|AAF63169.1|AC010657_5	160	5e-39	T5E21.13 [Arabidopsis thaliana]	sp|Q8RXF1|SF3A1_ARATH	160	3e-39	Probable splicing factor 3A subunit 1 OS=Arabidopsis thaliana GN=At1g14650 PE=1 SV=2	--	--	--	--	--	K12825	1e-45	177	vvi:100242352	splicing factor 3A subunit 1	-	-	-
fd_400	GAAC01000319	429	93	25.4841	gi|224074249|ref|XP_002304320.1|	263	4e-70	autoinhibited calcium ATPase [Populus trichocarpa] >gi|222841752|gb|EEE79299.1| autoinhibited calcium ATPase [Populus trichocarpa]	sp|Q2QMX9|ACA1_ORYSJ	243	3e-64	Calcium-transporting ATPase 1, plasma membrane-type OS=Oryza sativa subsp. japonica GN=Os12g0586600 PE=2 SV=1	aq_724	97.8	5e-21	COG0474	Cation transport ATPase	K01537	4e-64	239	osa:4331984	Ca2+-transporting ATPase [EC:3.6.3.8]	-	-	-
fd_401	GAAC01000320	952	123	15.1884	gi|9279693|dbj|BAB01250.1|	515	1e-145	kinase-like protein [Arabidopsis thaliana]	sp|Q2MHE4|HT1_ARATH	186	2e-46	Serine/threonine-protein kinase HT1 OS=Arabidopsis thaliana GN=HT1 PE=1 SV=1	MYPU_6850	99	1e-20	COG0515	Serine/threonine protein kinase	K04424	2e-34	142	ath:AT5G11850	sterile alpha motif and leucine zipper containing kinase AZK [EC:2.7.11.25]	-	-	-
fd_402	GAAC01000321	205	30	17.2033	--	--	--	--	--	--	--	--	--	--	--	--	--	--	--	--	--	--	-	-	-
fd_403	GAAC01000322	200	594	349.14	gi|89474476|gb|ABD72965.1|	67.8	4e-11	GRAS10 [Solanum lycopersicum]	sp|Q9FYR7|SCL8_ARATH	57.8	2e-08	Scarecrow-like protein 8 OS=Arabidopsis thaliana GN=SCL8 PE=2 SV=1	--	--	--	--	--	--	--	--	--	--	-	-	-
fd_404	GAAC01000323	409	81	23.2812	--	--	--	--	--	--	--	--	--	--	--	--	--	--	--	--	--	--	-	-	-
fd_405	GAAC01000324	1616	425	30.9165	gi|6899972|emb|CAB71293.1|	673	0	chloroplast ferredoxin-NADP+ oxidoreductase precursor [Capsicum annuum]	sp|O04977|FENR1_TOBAC	653	0	Ferredoxin--NADP reductase, leaf-type isozyme, chloroplastic OS=Nicotiana tabacum GN=PETH PE=2 SV=1	slr1643	353	6e-97	COG0369	Sulfite reductase, alpha subunit (flavoprotein)	K02641	0	665	vvi:100241976	ferredoxin--NADP+ reductase [EC:1.18.1.2]	-	-	-
fd_406	GAAC01000325	698	66	11.1156	gi|224098854|ref|XP_002311292.1|	94.7	9e-19	predicted protein [Populus trichocarpa] >gi|222851112|gb|EEE88659.1| predicted protein [Populus trichocarpa]	--	--	--	--	--	--	--	--	--	--	--	--	--	--	-	-	-
fd_407	GAAC01000326	2182	432	23.2741	gi|15239944|ref|NP_196799.1|	1027	0	catalytic [Arabidopsis thaliana]	--	--	--	--	BH1877	271	3e-72	COG3533	Uncharacterized protein conserved in bacteria	K09955	0	1179	vvi:100246702	hypothetical protein	-	-	-
fd_408	GAAC01000327	435	38	10.2692	--	--	--	--	--	--	--	--	--	--	--	--	--	--	--	--	--	--	-	-	-
fd_409	GAAC01000328	217	45	24.3779	gi|21105740|gb|AAM34769.1|AF509869_1	62.4	2e-09	nam-like protein 6 [Petunia x hybrida]	--	--	--	--	--	--	--	--	--	--	--	--	--	--	-	-	-
fd_410	GAAC01000329	298	50	19.7241	gi|115481730|ref|NP_001064458.1|	143	5e-34	Os10g0370500 [Oryza sativa Japonica Group] >gi|19920182|gb|AAM08614.1|AC107314_5 Putative Glucan 1,3-beta-glucosidase precursor [Oryza sativa Japonica Group] >gi|20043013|gb|AAM08821.1|AC113335_1 Putative Glucan 1,3-beta-glucosidase precursor [Oryza sativa Japonica Group] >gi|31431628|gb|AAP53379.1| Cellulase containing protein, expressed [Oryza sativa (japonica cultivar-group)] >gi|113639067|dbj…	sp|Q4WK60|EXGA_ASPFU	79.7	5e-15	Probable glucan 1,3-beta-glucosidase A OS=Aspergillus fumigatus GN=exgA PE=3 SV=1	YLR300w	64.3	5e-11	COG2730	Endoglucanase	K01210	3e-35	143	osa:4338201	glucan 1,3-beta-glucosidase [EC:3.2.1.58]	-	-	-
fd_411	GAAC01000330	848	148	20.5168	gi|1335862|gb|AAC49294.1|	546	1e-154	clathrin heavy chain [Glycine max]	sp|P11442|CLH_RAT	326	1e-88	Clathrin heavy chain 1 OS=Rattus norvegicus GN=Cltc PE=1 SV=3	--	--	--	--	--	K04646	1e-155	545	rcu:RCOM_0838580	clathrin, heavy polypeptide	-	-	-
fd_412	GAAC01000331	724	70	11.3659	gi|224143281|ref|XP_002324903.1|	390	1e-107	chromatin remodeling complex subunit [Populus trichocarpa] >gi|222866337|gb|EEF03468.1| chromatin remodeling complex subunit [Populus trichocarpa]	sp|Q9S775|PKL_ARATH	349	9e-96	CHD3-type chromatin-remodeling factor PICKLE OS=Arabidopsis thaliana GN=PKL PE=1 SV=1	YER164w	188	7e-48	COG0553	Superfamily II DNA/RNA helicases, SNF2 family	K11643	8e-97	349	ath:AT2G25170	chromodomain-helicase-DNA-binding protein 4 [EC:3.6.1.-]	-	-	-
fd_413	GAAC01000332	746	192	30.2556	gi|30698009|ref|NP_201242.2|	376	1e-103	BETA-UP (beta-ureidopropionase); beta-ureidopropionase [Arabidopsis thaliana] >gi|28193999|gb|AAO33358.1|AF465754_1 N-carbamyl-beta-alanine amidohydrolase [Arabidopsis thaliana] >gi|23306402|gb|AAN17428.1| beta-ureidopropionase [Arabidopsis thaliana] >gi|30725680|gb|AAP37862.1| At5g64370 [Arabidopsis thaliana]	sp|Q964D8|BUP1_DICDI	306	9e-83	Beta-ureidopropionase OS=Dictyostelium discoideum GN=pyd3 PE=1 SV=1	DR2535	85.9	6e-17	COG0388	Predicted amidohydrolase	K01431	9e-105	376	ath:AT5G64370	beta-ureidopropionase [EC:3.5.1.6]	-	-	-
fd_414	GAAC01000333	273	62	26.6976	gi|225453334|ref|XP_002270272.1|	106	7e-23	PREDICTED: similar to transcription factor [Vitis vinifera]	--	--	--	--	--	--	--	--	--	--	--	--	--	--	-	-	-
fd_415	GAAC01000334	2738	592	25.4174	gi|18403833|ref|NP_566736.1|	1169	0	HGL1 (heteroglycan glucosidase 1); hydrolase, hydrolyzing O-glycosyl compounds [Arabidopsis thaliana] >gi|186510357|ref|NP_001118685.1| HGL1 (heteroglycan glucosidase 1); hydrolase, hydrolyzing O-glycosyl compounds [Arabidopsis thaliana] >gi|16648903|gb|AAL24303.1| alpha glucosidase-like protein [Arabidopsis thaliana] >gi|27311799|gb|AAO00865.1| Unknown protein [Arabidopsis thaliana] >gi|31711788…	sp|Q9F234|AGL2_BACTQ	319	7e-108	Alpha-glucosidase 2 OS=Bacillus thermoamyloliquefaciens PE=3 SV=1	alr4773	330	6e-90	COG1501	Alpha-glucosidases, family 31 of glycosyl hydrolases	K05546	1e-92	284	olu:OSTLU_429	alpha 1,3-glucosidase [EC:3.2.1.84]	-	-	-
fd_416	GAAC01000335	797	111	16.3722	gi|82941457|dbj|BAE48793.1|	350	1e-114	sulfite oxidase [Codonopsis lanceolata]	sp|Q9S850|SUOX_ARATH	323	4e-107	Sulfite oxidase OS=Arabidopsis thaliana GN=SOX PE=1 SV=1	MT1801	101	3e-31	COG2041	Sulfite oxidase and related enzymes	K00387	8e-106	313	osa:4346125	sulfite oxidase [EC:1.8.3.1]	-	-	-
fd_417	GAAC01000336	407	84	24.2621	gi|15234742|ref|NP_194771.1|	166	1e-40	nodulin MtN21 family protein [Arabidopsis thaliana] >gi|7269943|emb|CAB79760.1| nodulin-like protein [Arabidopsis thaliana]	sp|Q6J163|5NG4_PINTA	102	7e-22	Auxin-induced protein 5NG4 OS=Pinus taeda PE=2 SV=1	--	--	--	--	--	--	--	--	--	--	-	-	-
fd_418	GAAC01000337	526	94	21.008	gi|297817422|ref|XP_002876594.1|	298	2e-80	GAUT1/LGT1 [Arabidopsis lyrata subsp. lyrata] >gi|297322432|gb|EFH52853.1| GAUT1/LGT1 [Arabidopsis lyrata subsp. lyrata]	sp|Q9LE59|GAUT1_ARATH	297	3e-80	Alpha-1,4-galacturonosyltransferase 1 OS=Arabidopsis thaliana GN=GAUT1 PE=1 SV=1	--	--	--	--	--	--	--	--	--	--	-	-	-
fd_419	GAAC01000338	235	232	116.055	gi|209491087|gb|ACI49697.1|	134	4e-31	polygalacturonase-inhibiting protein [Vaccinium corymbosum]	sp|A7PW81|PGIP_VITVI	122	5e-28	Polygalacturonase inhibitor OS=Vitis vinifera GN=pgip PE=1 SV=1	MA2301_1	48.5	3e-06	COG4886	Leucine-rich repeat (LRR) protein	K13420	2e-09	57	sbi:SORBI_06g028760	LRR receptor-like serine/threonine-protein kinase FLS2 [EC:2.7.11.1]	-	-	-
fd_420	GAAC01000339	596	114	22.4855	gi|238479240|ref|NP_001154516.1|	322	2e-87	dynamin-like protein 2b (ADL2b) [Arabidopsis thaliana]	sp|Q8LFT2|DRP3B_ARATH	322	1e-87	Dynamin-related protein 3B OS=Arabidopsis thaliana GN=DRP3B PE=1 SV=2	YLL001w	197	1e-50	COG0699	Predicted GTPases (dynamin-related)	K01528	1e-88	322	ath:AT2G14120	dynamin GTPase [EC:3.6.5.5]	-	-	-
fd_421	GAAC01000340	253	77	35.7778	gi|209362272|gb|ACI43571.1|	150	6e-36	RBP50 [Cucurbita maxima]	sp|Q6ICX4|PTBP3_ARATH	140	3e-33	Polypyrimidine tract-binding protein homolog 3 OS=Arabidopsis thaliana GN=At1g43190 PE=2 SV=1	--	--	--	--	--	K13218	2e-39	157	vvi:100243429	polypyrimidine tract-binding protein 1	-	-	-
fd_422	GAAC01000341	488	137	33.0023	gi|108862914|gb|ABA99200.2|	306	5e-83	MATH domain containing protein, expressed [Oryza sativa (japonica cultivar-group)]	sp|Q84WU2|UBP13_ARATH	91.7	2e-18	Ubiquitin carboxyl-terminal hydrolase 13 OS=Arabidopsis thaliana GN=UBP13 PE=1 SV=1	SPBC713.02c	48.1	7e-06	COG5077	Ubiquitin carboxyl-terminal hydrolase	K11838	3e-22	100	ppp:PHYPADRAFT_180457	ubiquitin carboxyl-terminal hydrolase 7 [EC:3.1.2.15]	-	-	-
fd_423	GAAC01000342	502	75	17.5631	gi|297844826|ref|XP_002890294.1|	159	2e-38	DNAJ heat shock N-terminal domain-containing protein [Arabidopsis lyrata subsp. lyrata] >gi|297336136|gb|EFH66553.1| DNAJ heat shock N-terminal domain-containing protein [Arabidopsis lyrata subsp. lyrata]	--	--	--	--	--	--	--	--	--	--	--	--	--	--	-	-	-
fd_424	GAAC01000343	1122	237	24.8313	gi|5080770|gb|AAD39280.1|AC007576_3	128	1e-28	Hypothetical protein [Arabidopsis thaliana]	--	--	--	--	--	--	--	--	--	--	--	--	--	--	-	-	-
fd_425	--	169	10	6.956	gi|71370259|gb|AAZ30377.1|	102	2e-21	PHB2 [Nicotiana benthamiana]	sp|P67779|PHB_RAT	86.3	5e-17	Prohibitin OS=Rattus norvegicus GN=Phb PE=1 SV=1	SPAC1782.06c	74.3	5e-14	COG0330	Membrane protease subunits, stomatin/prohibitin homologs	--	--	--	--	--	-	-	-
fd_426	GAAC01000344	711	101	16.6992	gi|79481791|ref|NP_193944.2|	117	2e-52	SRF8 (STRUBBELIG-RECEPTOR FAMILY 8); ATP binding / kinase/ protein binding / protein kinase/ protein serine/threonine kinase/ protein tyrosine kinase [Arabidopsis thaliana] >gi|75127758|sp|Q6R2J8.1|SRF8_ARATH RecName: Full=Protein STRUBBELIG-RECEPTOR FAMILY 8; AltName: Full=Leucine-rich repeat receptor kinase-like protein SRF8; Flags: Precursor >gi|41323415|gb|AAR99876.1| strubbelig receptor fami…	sp|Q6R2J8|SRF8_ARATH	117	1e-52	Protein STRUBBELIG-RECEPTOR FAMILY 8 OS=Arabidopsis thaliana GN=SRF8 PE=2 SV=1	--	--	--	--	--	K13430	7e-13	70.9	zma:100283091	serine/threonine-protein kinase PBS1 [EC:2.7.11.1]	-	-	-
fd_427	GAAC01000345	478	81	19.9205	gi|30687666|ref|NP_849555.1|	273	6e-73	GTG2 (GPCR-TYPE G PROTEIN 2) [Arabidopsis thaliana]	sp|Q0WQG8|GTG2_ARATH	273	3e-73	GPCR-type G protein 2 OS=Arabidopsis thaliana GN=GTG2 PE=1 SV=2	--	--	--	--	--	--	--	--	--	--	-	-	-
fd_428	--	551	33	7.0405	gi|224139776|ref|XP_002323271.1|	315	2e-85	chromatin remodeling complex subunit [Populus trichocarpa] >gi|222867901|gb|EEF05032.1| chromatin remodeling complex subunit [Populus trichocarpa]	sp|Q8RXS6|INO80_ARATH	301	2e-81	DNA helicase INO80 complex homolog 1 OS=Arabidopsis thaliana GN=INO80 PE=2 SV=2	ECU09g1890	182	3e-46	COG0553	Superfamily II DNA/RNA helicases, SNF2 family	K11665	1e-86	315	pop:POPTR_576236	DNA helicase INO80 [EC:3.6.1.-]	-	-	-
fd_429	--	653	102	18.3624	gi|115468584|ref|NP_001057891.1|	238	1e-105	Os06g0565900 [Oryza sativa Japonica Group] >gi|113595931|dbj|BAF19805.1| Os06g0565900 [Oryza sativa Japonica Group]	sp|Q9SLK6|ALA6_ARATH	219	2e-100	Phospholipid-transporting ATPase 6 OS=Arabidopsis thaliana GN=ALA6 PE=1 SV=2	SPAC4F10.16c	117	1e-49	COG0474	Cation transport ATPase	K01530	1e-107	240	rcu:RCOM_0654980	phospholipid-translocating ATPase [EC:3.6.3.1]	-	-	-
fd_430	GAAC01000346	289	24	9.7624	--	--	--	--	--	--	--	--	--	--	--	--	--	--	--	--	--	--	-	-	-
fd_431	GAAC01000347	682	64	11.0316	gi|297803912|ref|XP_002869840.1|	265	4e-70	kinase [Arabidopsis lyrata subsp. lyrata] >gi|297315676|gb|EFH46099.1| kinase [Arabidopsis lyrata subsp. lyrata]	sp|Q6R2J8|SRF8_ARATH	265	3e-70	Protein STRUBBELIG-RECEPTOR FAMILY 8 OS=Arabidopsis thaliana GN=SRF8 PE=2 SV=1	YJL005w_1	57	3e-08	COG4886	Leucine-rich repeat (LRR) protein	K13420	7e-20	94	sbi:SORBI_06g028760	LRR receptor-like serine/threonine-protein kinase FLS2 [EC:2.7.11.1]	-	-	-
fd_432	GAAC01000348	569	51	10.5366	gi|2499115|sp|P93231.1|VPS41_SOLLC	339	1e-92	RecName: Full=Vacuolar protein sorting-associated protein 41 homolog >gi|1835788|gb|AAB60857.1| VPS41 [Solanum lycopersicum]	sp|P93231|VPS41_SOLLC	339	8e-93	Vacuolar protein sorting-associated protein 41 homolog OS=Solanum lycopersicum GN=VPS41 PE=2 SV=1	--	--	--	--	--	--	--	--	--	--	-	-	-
fd_433	GAAC01000349	213	3	1.6557	--	--	--	--	--	--	--	--	--	--	--	--	--	--	--	--	--	--	-	-	-
fd_434	GAAC01000350	436	70	18.8736	gi|122194126|sp|Q1W376.1|PMM_SOYBN	180	4e-45	RecName: Full=Phosphomannomutase; AltName: Full=GmPMM >gi|90762150|gb|ABD97873.1| phosphomannomutase [Glycine max]	sp|Q1W376|PMM_SOYBN	180	2e-45	Phosphomannomutase OS=Glycine max PE=2 SV=1	YFL045c	132	3e-31	COG0561	Predicted hydrolases of the HAD superfamily	K01840	4e-46	179	osa:4337437	phosphomannomutase [EC:5.4.2.8]	-	-	-
fd_435	--	165	7	4.9872	--	--	--	--	--	--	--	--	--	--	--	--	--	--	--	--	--	--	-	-	-
fd_436	GAAC01000351	506	18	4.1818	--	--	--	--	--	--	--	--	--	--	--	--	--	--	--	--	--	--	-	-	-
fd_437	GAAC01000352	323	11	4.0034	--	--	--	--	--	--	--	--	--	--	--	--	--	--	--	--	--	--	-	-	-
fd_438	GAAC01000353	254	50	23.1409	gi|67515354|gb|AAY68206.1|	129	1e-29	RNA polymerase IV second largest subunit [Solanum lycopersicum]	sp|Q02061|RPB2_SCHPO	63.5	4e-10	DNA-directed RNA polymerase II subunit RPB2 OS=Schizosaccharomyces pombe GN=rpb2 PE=1 SV=2	SPAC23G3.01	63.5	9e-11	COG0085	DNA-directed RNA polymerase, beta subunit/140 kD subunit	K03010	1e-30	127	pop:POPTR_737361	DNA-directed RNA polymerase II subunit B [EC:2.7.7.6]	-	-	-
fd_439	GAAC01000354	537	125	27.364	gi|297834090|ref|XP_002884927.1|	260	5e-69	short-chain dehydrogenase/reductase family protein [Arabidopsis lyrata subsp. lyrata] >gi|297330767|gb|EFH61186.1| short-chain dehydrogenase/reductase family protein [Arabidopsis lyrata subsp. lyrata]	sp|Q9LTV6|DECR2_ARATH	259	7e-69	Peroxisomal 2,4-dienoyl-CoA reductase OS=Arabidopsis thaliana GN=At3g12800 PE=2 SV=1	Ta0205	117	1e-26	COG1028	Dehydrogenases with different specificities (related to short-chain alcohol dehydrogenases)	K13237	3e-75	277	vvi:100257583	peroxisomal 2,4-dienoyl-CoA reductase [EC:1.3.1.34]	-	-	-
fd_440	--	185	5	3.1772	--	--	--	--	--	--	--	--	--	--	--	--	--	--	--	--	--	--	-	-	-
fd_441	GAAC01000355	994	192	22.7069	gi|116309878|emb|CAH66915.1|	135	8e-31	OSIGBa0126B18.8 [Oryza sativa (indica cultivar-group)]	sp|Q10411|SPO15_SCHPO	88.2	8e-17	Sporulation-specific protein 15 OS=Schizosaccharomyces pombe GN=spo15 PE=1 SV=1	aq_1006	76.3	8e-14	COG0419	ATPase involved in DNA repair	K10696	5e-13	72	ppp:PHYPADRAFT_152947	E3 ubiquitin-protein ligase BRE1 [EC:6.3.2.19]	-	-	-
fd_442	--	193	26	15.8365	gi|225450454|ref|XP_002276596.1|	87	6e-17	PREDICTED: hypothetical protein [Vitis vinifera]	--	--	--	--	--	--	--	--	--	--	--	--	--	--	-	-	-
fd_443	GAAC01000356	415	148	41.9234	gi|3914559|sp|Q43463.1|RAB7_SOYBN	193	2e-58	RecName: Full=Ras-related protein Rab7 >gi|414834|gb|AAA34004.1| Rab7p [Glycine max]	sp|Q43463|RAB7_SOYBN	193	9e-59	Ras-related protein Rab7 OS=Glycine max PE=2 SV=1	SPAC18G6.03	80.5	6e-17	COG1100	GTPase SAR1 and related small G proteins	K07897	2e-59	223	vvi:100249742	Ras-related protein Rab-7A	-	-	-
fd_444	GAAC01000357	396	103	30.5763	gi|6014904|sp|Q38732.1|DAG_ANTMA	135	1e-31	RecName: Full=DAG protein, chloroplastic; Flags: Precursor >gi|1200205|emb|CAA65064.1| DAG [Antirrhinum majus]	sp|Q38732|DAG_ANTMA	135	8e-32	DAG protein, chloroplastic OS=Antirrhinum majus GN=DAG PE=2 SV=1	--	--	--	--	--	K06236	5e-06	46.6	pop:POPTR_584471	collagen, type I/II/III/V/XI, alpha	-	-	-
fd_445	GAAC01000358	239	24	11.8047	gi|222423196|dbj|BAH19575.1|	60.8	4e-09	AT3G09470 [Arabidopsis thaliana]	--	--	--	--	--	--	--	--	--	--	--	--	--	--	-	-	-
fd_446	GAAC01000359	556	101	21.3545	gi|225469131|ref|XP_002270366.1|	240	6e-63	PREDICTED: similar to octicosapeptide/Phox/Bem1p (PB1) domain-containing protein / tetratricopeptide repeat (TPR)-containing protein [Vitis vinifera]	--	--	--	--	--	--	--	--	--	--	--	--	--	--	-	-	-
fd_447	GAAC01000360	435	16	4.3239	gi|30681135|ref|NP_850004.1|	122	2e-48	protein binding [Arabidopsis thaliana] >gi|18087614|gb|AAL58937.1|AF462850_1 At2g20790/F5H14.24 [Arabidopsis thaliana] >gi|19699154|gb|AAL90943.1| At2g20790/F5H14.24 [Arabidopsis thaliana]	--	--	--	--	--	--	--	--	--	--	--	--	--	--	-	-	-
fd_448	--	195	24	14.4684	--	--	--	--	--	--	--	--	--	--	--	--	--	--	--	--	--	--	-	-	-
fd_449	GAAC01000361	409	31	8.9101	gi|5734780|gb|AAD50045.1|AC007980_10	68.9	1e-13	Hypothetical protein [Arabidopsis thaliana]	--	--	--	--	--	--	--	--	--	--	--	--	--	--	-	-	-
fd_450	GAAC01000362	414	231	65.5926	gi|82621170|gb|ABB86273.1|	270	4e-72	cytoplasmic ribosomal protein S13-like [Solanum tuberosum]	sp|P62302|RS13_SOYBN	266	3e-71	40S ribosomal protein S13 OS=Glycine max GN=RPS13 PE=2 SV=1	SPAC6F6.07c	213	8e-56	COG0184	Ribosomal protein S15P/S13E	K02953	4e-73	269	vvi:100242146	small subunit ribosomal protein S13e	-	-	-
fd_451	GAAC01000363	496	45	10.6653	gi|297790413|ref|XP_002863099.1|	94.7	4e-19	zinc finger family protein [Arabidopsis lyrata subsp. lyrata] >gi|297795351|ref|XP_002865560.1| zinc finger family protein [Arabidopsis lyrata subsp. lyrata] >gi|297308918|gb|EFH39358.1| zinc finger family protein [Arabidopsis lyrata subsp. lyrata] >gi|297311395|gb|EFH41819.1| zinc finger family protein [Arabidopsis lyrata subsp. lyrata]	sp|Q8L9W3|ATL5J_ARATH	94	4e-19	RING-H2 finger protein ATL5J OS=Arabidopsis thaliana GN=ATL5J PE=2 SV=2	--	--	--	--	--	--	--	--	--	--	-	-	-
fd_452	GAAC01000364	205	6	3.4407	gi|297793233|ref|XP_002864501.1|	88.2	3e-17	ATPAP28/PAP28 [Arabidopsis lyrata subsp. lyrata] >gi|297310336|gb|EFH40760.1| ATPAP28/PAP28 [Arabidopsis lyrata subsp. lyrata]	sp|Q9LU72|PPA28_ARATH	86.7	4e-17	Probable inactive purple acid phosphatase 28 OS=Arabidopsis thaliana GN=PAP28 PE=2 SV=1	--	--	--	--	--	--	--	--	--	--	-	-	-
fd_453	GAAC01000365	394	17	5.0722	gi|226506384|ref|NP_001148210.1|	89.7	9e-18	SWIB/MDM2 domain containing protein [Zea mays] >gi|195616714|gb|ACG30187.1| SWIB/MDM2 domain containing protein [Zea mays]	--	--	--	--	--	--	--	--	--	--	--	--	--	--	-	-	-
fd_454	GAAC01000366	748	85	13.3586	--	--	--	--	--	--	--	--	--	--	--	--	--	--	--	--	--	--	-	-	-
fd_455	--	163	2	1.4424	--	--	--	--	--	--	--	--	--	--	--	--	--	--	--	--	--	--	-	-	-
fd_456	GAAC01000367	637	85	15.6864	gi|297846628|ref|XP_002891195.1|	109	3e-23	binding protein [Arabidopsis lyrata subsp. lyrata] >gi|297337037|gb|EFH67454.1| binding protein [Arabidopsis lyrata subsp. lyrata]	--	--	--	--	--	--	--	--	--	--	--	--	--	--	-	-	-
fd_457	GAAC01000368	333	153	54.012	gi|15217851|ref|NP_171772.1|	156	6e-38	GATL5 (GALACTURONOSYLTRANSFERASE 5); polygalacturonate 4-alpha-galacturonosyltransferase/ transferase, transferring glycosyl groups / transferase, transferring hexosyl groups [Arabidopsis thaliana] >gi|42571307|ref|NP_973744.1| GATL5 (GALACTURONOSYLTRANSFERASE 5); polygalacturonate 4-alpha-galacturonosyltransferase/ transferase, transferring glycosyl groups / transferase, transferring hexosyl gro…	sp|Q9FWY9|GATL5_ARATH	156	3e-38	Probable galacturonosyltransferase-like 5 OS=Arabidopsis thaliana GN=GATL5 PE=2 SV=1	--	--	--	--	--	--	--	--	--	--	-	-	-
fd_458	--	185	4	2.5417	gi|39545843|emb|CAE04751.3|	79	2e-14	OSJNBb0060E08.14 [Oryza sativa (japonica cultivar-group)]	sp|P04146|COPIA_DROME	50.4	3e-06	Copia protein OS=Drosophila melanogaster GN=GIP PE=1 SV=3	--	--	--	--	--	--	--	--	--	--	-	-	-
fd_459	GAAC01000369	1521	232	17.9309	gi|161958652|dbj|BAF95165.1|	408	1e-113	protein kinase [Ipomoea nil]	sp|Q9CAL3|CRK2_ARATH	215	8e-55	Cysteine-rich receptor-like protein kinase 2 OS=Arabidopsis thaliana GN=CRK2 PE=2 SV=1	--	--	--	--	--	K13417	5e-20	96.3	ath:AT2G13790	somatic embryogenesis receptor kinase 4 [EC:2.7.10.1 2.7.11.1]	-	-	-
fd_460	--	181	8	5.1958	--	--	--	--	--	--	--	--	--	--	--	--	--	--	--	--	--	--	-	-	-
fd_461	--	175	1	0.6717	--	--	--	--	--	--	--	--	--	--	--	--	--	--	--	--	--	--	-	-	-
fd_462	GAAC01000370	233	74	37.3352	gi|34581773|gb|AAQ76042.1|	145	1e-34	signal recognition particle receptor protein [Cucumis sativus]	sp|Q9U5L1|SRPR_DROME	130	3e-30	Signal recognition particle receptor subunit alpha homolog OS=Drosophila melanogaster GN=Gtp-bp PE=1 SV=2	ECU10g0170	79.7	1e-15	COG0552	Signal recognition particle GTPase	K13431	2e-35	143	rcu:RCOM_0623540	signal recognition particle receptor subunit alpha	-	-	-
fd_463	GAAC01000371	317	23	8.5293	gi|283837097|emb|CBH19893.1|	195	1e-49	cell division control 20 [Solanum lycopersicum var. cerasiforme]	sp|Q8LPL5|FZR3_ARATH	115	8e-26	Protein FIZZY-RELATED 3 OS=Arabidopsis thaliana GN=FZR3 PE=1 SV=1	SPAC144.13c	97.1	7e-21	COG2319	FOG: WD40 repeat	K03363	1e-50	194	vvi:100250079	cell division cycle 20, cofactor of APC complex	-	-	-
fd_464	GAAC01000372	641	121	22.1907	gi|186505512|ref|NP_181076.3|	279	2e-74	protein binding / zinc ion binding [Arabidopsis thaliana]	sp|Q8RX22|MIP1_ARATH	255	2e-67	MND1-interacting protein 1 OS=Arabidopsis thaliana GN=MIP1 PE=1 SV=1	--	--	--	--	--	K11498	1e-07	53.1	ath:AT2G21380	centromeric protein E	-	-	-
fd_465	--	192	14	8.5718	gi|297604347|ref|NP_001055269.2|	135	1e-31	Os05g0349200 [Oryza sativa Japonica Group] >gi|255676283|dbj|BAF17183.2| Os05g0349200 [Oryza sativa Japonica Group]	sp|Q84NP7|AMPD_ORYSJ	132	7e-31	Probable AMP deaminase OS=Oryza sativa subsp. japonica GN=AMPD PE=2 SV=1	SPBC106.04	70.1	9e-13	COG1816	Adenosine deaminase	K01490	5e-34	139	rcu:RCOM_0186440	AMP deaminase [EC:3.5.4.6]	-	-	-
fd_466	--	199	14	8.2702	--	--	--	--	--	--	--	--	--	--	--	--	--	--	--	--	--	--	-	-	-
fd_467	--	188	10	6.253	gi|15242555|ref|NP_195905.1|	107	4e-23	hydroxyproline-rich glycoprotein family protein [Arabidopsis thaliana]	--	--	--	--	--	--	--	--	--	--	--	--	--	--	-	-	-
fd_468	GAAC01000373	422	37	10.307	gi|297839995|ref|XP_002887879.1|	57.4	5e-08	RWP-RK domain-containing protein [Arabidopsis lyrata subsp. lyrata] >gi|297333720|gb|EFH64138.1| RWP-RK domain-containing protein [Arabidopsis lyrata subsp. lyrata]	--	--	--	--	--	--	--	--	--	--	--	--	--	--	-	-	-
fd_469	GAAC01000374	745	135	21.302	gi|226531370|ref|NP_001147931.1|	370	1e-102	ubiquitin-protein ligase/ zinc ion binding protein [Zea mays] >gi|195614664|gb|ACG29162.1| ubiquitin-protein ligase/ zinc ion binding protein [Zea mays]	sp|Q9SKC3|ARI9_ARATH	69.3	2e-11	Probable E3 ubiquitin-protein ligase ARI9 OS=Arabidopsis thaliana GN=ARI9 PE=2 SV=1	--	--	--	--	--	K11971	1e-09	60.1	osa:4336840	E3 ubiquitin-protein ligase RNF14 [EC:6.3.2.19]	-	-	-
fd_470	GAAC01000375	401	161	47.1981	gi|213959182|gb|ACJ54925.1|	246	7e-65	TCP-1/cpn60 chaperonin [Oryza sativa Japonica Group]	sp|Q552J0|TCPQ_DICDI	140	3e-33	T-complex protein 1 subunit theta OS=Dictyostelium discoideum GN=cct8 PE=3 SV=1	YJL008c	118	3e-27	COG0459	Chaperonin GroEL (HSP60 family)	K09500	3e-66	246	sbi:SORBI_05g022470	T-complex protein 1 subunit theta	-	-	-
fd_471	--	199	17	10.0424	--	--	--	--	--	--	--	--	--	--	--	--	--	--	--	--	--	--	-	-	-
fd_472	GAAC01000376	415	64	18.1291	gi|224067828|ref|XP_002302553.1|	67.4	5e-11	predicted protein [Populus trichocarpa] >gi|222844279|gb|EEE81826.1| predicted protein [Populus trichocarpa]	--	--	--	--	--	--	--	--	--	K13510	3e-12	67.4	pop:POPTR_851914	lysophosphatidylcholine acyltransferase / lyso-PAF acetyltransferase [EC:2.3.1.23 2.3.1.67]	-	-	-
fd_473	GAAC01000377	241	13	6.3412	gi|255562196|ref|XP_002522106.1|	50.8	5e-06	conserved hypothetical protein [Ricinus communis] >gi|223538705|gb|EEF40306.1| conserved hypothetical protein [Ricinus communis]	--	--	--	--	--	--	--	--	--	--	--	--	--	--	-	-	-
fd_474	GAAC01000378	233	23	11.6042	gi|6688535|emb|CAB65172.1|	60.5	6e-09	Rab11 GTPase [Solanum lycopersicum]	sp|Q01111|YPT3_NICPL	59.3	7e-09	Ras-related protein YPT3 OS=Nicotiana plumbaginifolia GN=YPT3 PE=2 SV=1	--	--	--	--	--	K07976	4e-08	53.1	osa:4324623	Rab family, other	-	-	-
fd_475	GAAC01000379	1049	183	20.5078	gi|18391056|ref|NP_563850.1|	276	4e-73	HYL1 (HYPONASTIC LEAVES 1); double-stranded RNA binding / miRNA binding / protein binding [Arabidopsis thaliana] >gi|12247457|gb|AAG49890.1|AF276440_1 hyponastic leave 1 [Arabidopsis thaliana] >gi|2160163|gb|AAB60726.1| F21M12.9 gene product [Arabidopsis thaliana] >gi|15451102|gb|AAK96822.1| Unknown protein [Arabidopsis thaliana]	sp|B0V3F8|PRKRA_DANRE	53.1	3e-06	Interferon-inducible double stranded RNA-dependent protein kinase activator A homolog OS=Danio rerio GN=prkra PE=2 SV=2	--	--	--	--	--	--	--	--	--	--	-	-	-
fd_476	--	691	37	6.2946	gi|297829076|ref|XP_002882420.1|	74.3	9e-20	phospholipid/glycerol acyltransferase family protein [Arabidopsis lyrata subsp. lyrata] >gi|297328260|gb|EFH58679.1| phospholipid/glycerol acyltransferase family protein [Arabidopsis lyrata subsp. lyrata]	--	--	--	--	--	--	--	--	--	--	--	--	--	--	-	-	-
fd_477	GAAC01000380	223	11	5.7987	--	--	--	--	--	--	--	--	--	--	--	--	--	--	--	--	--	--	-	-	-
fd_478	GAAC01000381	403	76	22.1693	gi|498040|gb|AAA33935.1|	144	2e-34	ORF [Senecio odorus]	sp|Q946Y7|SYP61_ARATH	140	2e-33	Syntaxin-61 OS=Arabidopsis thaliana GN=SYP61 PE=1 SV=1	--	--	--	--	--	K08498	6e-39	155	pop:POPTR_817835	syntaxin 6	-	-	-
fd_479	GAAC01000382	227	14	7.2501	gi|224139184|ref|XP_002323001.1|	50.1	8e-06	predicted protein [Populus trichocarpa] >gi|222867631|gb|EEF04762.1| predicted protein [Populus trichocarpa]	--	--	--	--	--	--	--	--	--	--	--	--	--	--	-	-	-
fd_480	GAAC01000383	221	6	3.1916	gi|2245136|emb|CAB10557.1|	156	8e-38	trehalose-6-phosphate synthase like protein [Arabidopsis thaliana] >gi|7268530|emb|CAB78780.1| trehalose-6-phosphate synthase like protein [Arabidopsis thaliana]	sp|O23617|TPS5_ARATH	156	4e-38	Alpha,alpha-trehalose-phosphate synthase [UDP-forming] 5 OS=Arabidopsis thaliana GN=TPS5 PE=1 SV=2	SPACUNK4.16c_1	52.8	2e-07	COG0380	Trehalose-6-phosphate synthase	K00697	3e-30	126	ath:AT1G06410	alpha,alpha-trehalose-phosphate synthase (UDP-forming) [EC:2.4.1.15]	-	-	-
fd_481	GAAC01000384	1109	181	19.1863	gi|15237716|ref|NP_196063.1|	410	1e-113	BTR1L (BINDING TO TOMV RNA 1L (LONG FORM)); nucleic acid binding / single-stranded RNA binding [Arabidopsis thaliana] >gi|14030641|gb|AAK52995.1|AF375411_1 AT5g04430/T32M21_30 [Arabidopsis thaliana] >gi|23507775|gb|AAN38691.1| At5g04430/T32M21_30 [Arabidopsis thaliana]	sp|Q80WA4|NOVA1_RAT	123	3e-27	RNA-binding protein Nova-1 (Fragment) OS=Rattus norvegicus GN=Nova1 PE=2 SV=1	--	--	--	--	--	K13210	5e-17	85.5	ppp:PHYPADRAFT_80579	far upstream element-binding protein	-	-	-
fd_482	GAAC01000385	416	23	6.4995	gi|296149181|gb|ADG96405.1|	109	1e-23	S-locus receptor kinase [Olea europaea]	sp|Q9XEC7|CRK37_ARATH	68.6	1e-11	Cysteine-rich receptor-like protein kinase 37 OS=Arabidopsis thaliana GN=CRK37 PE=2 SV=1	--	--	--	--	--	K13415	3e-06	47.4	ath:AT4G39400	protein brassinosteroid insensitive 1 [EC:2.7.10.1 2.7.11.1]	-	-	-
fd_483	GAAC01000386	405	36	10.4494	gi|48310010|gb|AAT41736.1|	71.2	3e-12	At3g45900 [Arabidopsis thaliana]	--	--	--	--	--	--	--	--	--	--	--	--	--	--	-	-	-
fd_484	GAAC01000387	765	441	67.7673	gi|71143481|gb|AAZ23955.1|	330	8e-90	GDSL-lipase 1 [Capsicum annuum]	sp|Q9C7N4|GDL15_ARATH	300	5e-81	GDSL esterase/lipase At1g29670 OS=Arabidopsis thaliana GN=At1g29670 PE=2 SV=1	--	--	--	--	--	--	--	--	--	--	-	-	-
fd_485	GAAC01000388	616	180	34.3507	gi|18398260|ref|NP_565399.1|	164	9e-40	RNA recognition motif (RRM)-containing protein [Arabidopsis thaliana] >gi|133778824|gb|ABO38752.1| At2g16940 [Arabidopsis thaliana]	sp|Q5T200|ZC3HD_HUMAN	124	3e-28	Zinc finger CCCH domain-containing protein 13 OS=Homo sapiens GN=ZC3H13 PE=1 SV=1	PA2976	65.9	5e-11	COG1530	Ribonucleases G and E	K13091	6e-49	190	vvi:100243992	RNA-binding protein 39	-	-	-
fd_486	GAAC01000389	486	59	14.2711	gi|18418260|ref|NP_567931.1|	253	9e-67	DRP3A (DYNAMIN-RELATED PROTEIN 3A); GTP binding / GTPase/ phosphoinositide binding [Arabidopsis thaliana] >gi|60392233|sp|Q8S944.2|DRP3A_ARATH RecName: Full=Dynamin-related protein 3A; AltName: Full=Dynamin-like protein 2a; AltName: Full=Dynamin-like protein 2 >gi|3549667|emb|CAA20578.1| Arabidopsis dynamin-like protein ADL2 [Arabidopsis thaliana] >gi|7270313|emb|CAB80082.1| Arabidopsis dynamin-l…	sp|Q8S944|DRP3A_ARATH	253	5e-67	Dynamin-related protein 3A OS=Arabidopsis thaliana GN=DRP3A PE=1 SV=2	YLL001w	110	1e-24	COG0699	Predicted GTPases (dynamin-related)	K01528	1e-63	238	ath:AT2G14120	dynamin GTPase [EC:3.6.5.5]	-	-	-
fd_487	GAAC01000390	435	103	27.835	gi|15239630|ref|NP_200249.1|	138	2e-32	THE1 (THESEUS1); kinase/ protein kinase [Arabidopsis thaliana] >gi|75335100|sp|Q9LK35.1|THE1_ARATH RecName: Full=Receptor-like protein kinase THESEUS 1; Flags: Precursor >gi|8953753|dbj|BAA98098.1| receptor-protein kinase-like protein [Arabidopsis thaliana]	sp|Q9LK35|THE1_ARATH	138	1e-32	Receptor-like protein kinase THESEUS 1 OS=Arabidopsis thaliana GN=THE1 PE=1 SV=1	--	--	--	--	--	K04733	2e-06	48.5	ath:AT5G38990	interleukin-1 receptor-associated kinase 4 [EC:2.7.11.1]	-	-	-
fd_488	GAAC01000391	1491	1073	84.599	gi|224138238|ref|XP_002322764.1|	902	0	white-brown-complex ABC transporter family [Populus trichocarpa] >gi|222867394|gb|EEF04525.1| white-brown-complex ABC transporter family [Populus trichocarpa]	sp|Q93YS4|AB22G_ARATH	833	0	ABC transporter G family member 22 OS=Arabidopsis thaliana GN=ABCG22 PE=1 SV=1	YCR011c_2	199	1e-50	COG1131	ABC-type multidrug transport system, ATPase component	K05681	7e-76	281	cme:CMS467C	ATP-binding cassette, subfamily G (WHITE), member 2	-	-	-
fd_489	GAAC01000392	388	328	99.3769	gi|20453062|gb|AAM19776.1|	243	5e-64	AT3g08530/T8G24_1 [Arabidopsis thaliana] >gi|21928019|gb|AAM78038.1| AT3g08530/T8G24_1 [Arabidopsis thaliana]	sp|P11442|CLH_RAT	174	2e-43	Clathrin heavy chain 1 OS=Rattus norvegicus GN=Cltc PE=1 SV=3	--	--	--	--	--	K04646	5e-69	255	pop:POPTR_567249	clathrin, heavy polypeptide	-	-	-
fd_490	--	180	6	3.9185	--	--	--	--	--	--	--	--	--	--	--	--	--	--	--	--	--	--	-	-	-
fd_491	GAAC01000393	260	21	9.4949	gi|40781599|gb|AAR89809.1|	99.4	1e-20	reductase 1 [Hydrangea macrophylla] >gi|40781603|gb|AAR89811.1| reductase 1 [Hydrangea macrophylla]	sp|Q7G764|NADO1_ORYSJ	71.2	2e-12	Probable NAD(P)H-dependent oxidoreductase 1 OS=Oryza sativa subsp. japonica GN=Os10g0113000 PE=1 SV=1	YBR149w	57.4	6e-09	COG0656	Aldo/keto reductases, related to diketogulonate reductase	K00100	1e-12	68.2	osa:4335976	[EC:1.1.1.-]	-	-	-
fd_492	GAAC01000394	721	789	128.643	gi|225007948|gb|ACN78666.1|	421	1e-117	endo-beta-mannanase [Vaccinium corymbosum]	sp|Q0JKM9|MAN1_ORYSJ	357	3e-98	Mannan endo-1,4-beta-mannosidase 1 OS=Oryza sativa subsp. japonica GN=MAN1 PE=2 SV=2	TM1227	170	2e-42	COG3934	Endo-beta-mannanase	--	--	--	--	--	-	-	-
fd_493	GAAC01000395	1167	194	19.5422	gi|195616080|gb|ACG29870.1|	525	1e-148	AMP-binding protein [Zea mays]	sp|A7GU88|MENE_BACCN	145	7e-34	2-succinylbenzoate--CoA ligase OS=Bacillus cereus subsp. cytotoxis (strain NVH 391-98) GN=menE PE=3 SV=1	DR0336	259	6e-69	COG0318	Acyl-CoA synthetases (AMP-forming)/AMP-acid ligases II	K01904	6e-24	108	ath:AT1G62940	4-coumarate--CoA ligase [EC:6.2.1.12]	-	-	-
fd_494	GAAC01000396	200	32	18.8089	gi|164604976|dbj|BAF98284.1|	95.5	2e-19	5-phosphomevelonate kinase [Hevea brasiliensis]	--	--	--	--	--	--	--	--	--	K00938	8e-21	95.1	rcu:RCOM_0699810	phosphomevalonate kinase [EC:2.7.4.2]	-	-	-
fd_495	GAAC01000397	245	51	24.4707	gi|224122778|ref|XP_002330477.1|	172	1e-42	histone acetyltransferase [Populus trichocarpa] >gi|222871889|gb|EEF09020.1| histone acetyltransferase [Populus trichocarpa]	sp|Q9FWQ5|HAC12_ARATH	162	8e-40	Histone acetyltransferase HAC12 OS=Arabidopsis thaliana GN=HAC12 PE=2 SV=2	--	--	--	--	--	K04498	4e-44	172	rcu:RCOM_1573230	E1A/CREB-binding protein [EC:2.3.1.48]	-	-	-
fd_496	GAAC01000398	228	11	5.6715	gi|255291798|dbj|BAH89252.1|	123	5e-28	protein disulfide isomerase L-3b [Glycine max]	sp|Q17770|PDI2_CAEEL	67.4	3e-11	Protein disulfide-isomerase 2 OS=Caenorhabditis elegans GN=pdi-2 PE=1 SV=1	--	--	--	--	--	K09580	3e-08	53.5	cre:CHLREDRAFT_195895	protein disulfide-isomerase A1 [EC:5.3.4.1]	-	-	-
fd_497	GAAC01000399	232	353	178.867	gi|284520976|gb|ADB93063.1|	125	1e-28	universal stress protein [Jatropha curcas]	--	--	--	--	--	--	--	--	--	--	--	--	--	--	-	-	-
fd_498	GAAC01000400	244	30	14.4536	gi|224111730|ref|XP_002315956.1|	57.4	5e-08	predicted protein [Populus trichocarpa] >gi|222864996|gb|EEF02127.1| predicted protein [Populus trichocarpa]	--	--	--	--	--	--	--	--	--	--	--	--	--	--	-	-	-
fd_499	GAAC01000401	222	23	12.1792	gi|115461803|ref|NP_001054501.1|	60.1	7e-09	Os05g0121800 [Oryza sativa Japonica Group] >gi|113578052|dbj|BAF16415.1| Os05g0121800 [Oryza sativa Japonica Group]	--	--	--	--	--	--	--	--	--	--	--	--	--	--	-	-	-
fd_500	GAAC01000402	417	111	31.2918	gi|15232542|ref|NP_188773.1|	207	3e-53	electron carrier/ oxidoreductase [Arabidopsis thaliana] >gi|73921104|sp|Q9LIG0.1|Y3136_ARATH RecName: Full=Clavaminate synthase-like protein At3g21360 >gi|56967335|pdb|1Y0Z|A Chain A, X-Ray Structure Of Gene Product From Arabidopsis Thaliana At3g21360 >gi|56967336|pdb|1Y0Z|B Chain B, X-Ray Structure Of Gene Product From Arabidopsis Thaliana At3g21360 >gi|150261485|pdb|2Q4A|A Chain A, Ensemble Ref…	sp|Q9LIG0|Y3136_ARATH	207	2e-53	Clavaminate synthase-like protein At3g21360 OS=Arabidopsis thaliana GN=At3g21360 PE=1 SV=1	--	--	--	--	--	--	--	--	--	--	-	-	-
fd_501	GAAC01000403	270	45	19.5926	gi|225442541|ref|XP_002284183.1|	99.4	1e-20	PREDICTED: hypothetical protein [Vitis vinifera] >gi|297743233|emb|CBI36100.3| unnamed protein product [Vitis vinifera]	--	--	--	--	--	--	--	--	--	--	--	--	--	--	-	-	-
fd_502	GAAC01000404	516	36	8.2016	gi|297848592|ref|XP_002892177.1|	142	1e-33	F21B7.33 [Arabidopsis lyrata subsp. lyrata] >gi|297338019|gb|EFH68436.1| F21B7.33 [Arabidopsis lyrata subsp. lyrata]	sp|P49907|SEPP1_BOVIN	52.8	1e-06	Selenoprotein P OS=Bos taurus GN=SEPP1 PE=2 SV=2	--	--	--	--	--	--	--	--	--	--	-	-	-
fd_503	GAAC01000405	544	979	211.557	gi|297822497|ref|XP_002879131.1|	144	7e-34	SCPL51 [Arabidopsis lyrata subsp. lyrata] >gi|297324970|gb|EFH55390.1| SCPL51 [Arabidopsis lyrata subsp. lyrata]	sp|Q67Y83|SCP51_ARATH	142	1e-33	Serine carboxypeptidase-like 51 OS=Arabidopsis thaliana GN=SCPL51 PE=2 SV=2	SPAC19G12.10c_2	53.1	3e-07	COG2939	Carboxypeptidase C (cathepsin A)	K09646	1e-34	142	ath:AT2G27920	serine carboxypeptidase 1 [EC:3.4.16.-]	-	-	-
fd_504	GAAC01000406	260	16	7.2342	gi|4741190|emb|CAB41856.1|	129	1e-29	ABC-type transport-like protein [Arabidopsis thaliana]	sp|Q84K47|AB2A_ARATH	129	7e-30	ABC transporter A family member 2 OS=Arabidopsis thaliana GN=ABCA2 PE=2 SV=1	--	--	--	--	--	--	--	--	--	--	-	-	-
fd_505	GAAC01000407	233	16	8.0725	gi|4056428|gb|AAC98002.1|	81.3	2e-21	Similar to gb|U43629 integral membrane protein from Beta vulgaris and a member of sugar transporter family PF|00083 [Arabidopsis thaliana]	sp|Q0WVE9|PLST1_ARATH	81.3	9e-22	Probable plastidic glucose transporter 1 OS=Arabidopsis thaliana GN=At1g05030 PE=2 SV=2	--	--	--	--	--	--	--	--	--	--	-	-	-
fd_506	GAAC01000408	269	49	21.4135	gi|6066285|gb|AAF03236.1|AF180143_1	103	8e-22	ubiquitin carrier protein 4 [Glycine max]	sp|P16577|UBC4_WHEAT	97.8	2e-20	Ubiquitin-conjugating enzyme E2-23 kDa OS=Triticum aestivum GN=UBC4 PE=1 SV=1	YEL012w	70.5	7e-13	COG5078	Ubiquitin-protein ligase	K10576	5e-24	105	vvi:100244806	ubiquitin-conjugating enzyme E2 H [EC:6.3.2.19]	-	-	-
fd_507	GAAC01000409	285	21	8.662	--	--	--	--	--	--	--	--	--	--	--	--	--	--	--	--	--	--	-	-	-
fd_508	GAAC01000410	230	56	28.6222	gi|3551247|dbj|BAA32822.1|	158	2e-38	181 [Daucus carota]	sp|Q9FLF7|MYST1_ARATH	155	7e-38	Probable MYST-like histone acetyltransferase 1 OS=Arabidopsis thaliana GN=HAG4 PE=2 SV=1	YOR244w	110	5e-25	COG5027	Histone acetyltransferase (MYST family)	K11308	8e-40	158	vvi:100247177	histone acetyltransferase MYST1 [EC:2.3.1.48]	-	-	-
fd_509	GAAC01000411	405	152	44.1196	--	--	--	--	--	--	--	--	--	--	--	--	--	--	--	--	--	--	-	-	-
fd_510	--	528	67	14.9171	gi|15236339|ref|NP_192264.1|	80.5	9e-15	ATGSL05 (GLUCAN SYNTHASE-LIKE 5); 1,3-beta-glucan synthase/ transferase, transferring glycosyl groups [Arabidopsis thaliana] >gi|75216593|sp|Q9ZT82.1|CALSC_ARATH RecName: Full=Callose synthase 12; AltName: Full=1,3-beta-glucan synthase; AltName: Full=Protein GLUCAN SYNTHASE-LIKE 5; AltName: Full=Protein POWDERY MILDEW RESISTANT 4	sp|Q9ZT82|CALSC_ARATH	80.5	5e-15	Callose synthase 12 OS=Arabidopsis thaliana GN=CALS12 PE=1 SV=1	--	--	--	--	--	K11000	5e-16	80.5	ath:AT4G03550	callose synthase [EC:2.4.1.-]	-	-	-
fd_511	GAAC01000412	563	33	6.8905	gi|15242935|ref|NP_197659.1|	62.8	2e-09	F-box family protein [Arabidopsis thaliana] >gi|75262763|sp|Q9FNJ4.1|FDL32_ARATH RecName: Full=Putative F-box/FBD/LRR-repeat protein At5g22670	sp|Q94B46|FBL74_ARATH	62	2e-09	F-box/LRR-repeat protein At4g14096 OS=Arabidopsis thaliana GN=At4g14096 PE=2 SV=1	--	--	--	--	--	--	--	--	--	--	-	-	-
fd_512	GAAC01000413	451	42	10.9475	gi|256010122|gb|ACU55134.1|	72.4	2e-12	H6-like protein [Gossypium hirsutum]	sp|Q9FPR2|AGP18_ARATH	60.5	4e-09	Lysine-rich arabinogalactan protein 18 OS=Arabidopsis thaliana GN=AGP18 PE=2 SV=1	--	--	--	--	--	--	--	--	--	--	-	-	-
fd_513	--	164	1	0.7168	--	--	--	--	--	--	--	--	--	--	--	--	--	--	--	--	--	--	-	-	-
fd_514	--	191	31	19.0797	gi|121501708|gb|ABM55249.1|	137	3e-32	casein kinase [Beta vulgaris]	sp|P42158|KC1D_ARATH	137	2e-32	Casein kinase I isoform delta-like OS=Arabidopsis thaliana GN=At4g26100 PE=2 SV=2	--	--	--	--	--	K02218	2e-33	136	ath:AT1G72710	casein kinase 1 [EC:2.7.11.1]	-	-	-
fd_515	--	194	10	6.0596	gi|226499000|ref|NP_001147122.1|	115	1e-25	calcium binding atopy-related autoantigen 1 [Zea mays] >gi|195607438|gb|ACG25549.1| calcium binding atopy-related autoantigen 1 [Zea mays]	sp|Q6P6Q9|CBAA1_RAT	67.4	3e-11	Calcium-binding atopy-related autoantigen 1 OS=Rattus norvegicus GN=Cbara1 PE=2 SV=1	--	--	--	--	--	--	--	--	--	--	-	-	-
fd_516	GAAC01000414	1912	415	25.5155	gi|115459306|ref|NP_001053253.1|	256	7e-67	Os04g0505400 [Oryza sativa Japonica Group] >gi|32490273|emb|CAE05562.1| OSJNBb0116K07.15 [Oryza sativa (japonica cultivar-group)] >gi|113564824|dbj|BAF15167.1| Os04g0505400 [Oryza sativa Japonica Group] >gi|116310257|emb|CAH67264.1| OSIGBa0145C12.1 [Oryza sativa (indica cultivar-group)]	sp|Q9SD53|Y3720_ARATH	152	1e-35	UPF0481 protein At3g47200 OS=Arabidopsis thaliana GN=At3g47200 PE=1 SV=1	--	--	--	--	--	--	--	--	--	--	-	-	-
fd_517	GAAC01000415	223	30	15.8146	--	--	--	--	--	--	--	--	--	--	--	--	--	--	--	--	--	--	-	-	-
fd_518	--	182	72	46.5055	gi|301601258|dbj|BAJ13301.1|	115	1e-25	autophagy 8 [Ipomoea nil]	sp|Q6Z1D5|ATG8C_ORYSJ	114	1e-25	Autophagy-related protein 8C OS=Oryza sativa subsp. japonica GN=ATG8C PE=2 SV=1	--	--	--	--	--	K08341	1e-27	117	rcu:RCOM_1302500	GABA(A) receptor-associated protein (autophagy-related protein 8)	-	-	-
fd_519	GAAC01000416	218	4	2.157	gi|145327757|ref|NP_001077854.1|	62	2e-09	glycosyltransferase family protein 47 [Arabidopsis thaliana]	--	--	--	--	--	--	--	--	--	--	--	--	--	--	-	-	-
fd_520	GAAC01000417	550	138	29.4958	gi|297820170|ref|XP_002877968.1|	206	1e-52	ATVAMP727 [Arabidopsis lyrata subsp. lyrata] >gi|297323806|gb|EFH54227.1| ATVAMP727 [Arabidopsis lyrata subsp. lyrata]	sp|Q9M376|VA727_ARATH	205	1e-52	Vesicle-associated membrane protein 727 OS=Arabidopsis thaliana GN=VAMP727 PE=2 SV=1	SPAC6G9.11	72.4	4e-13	COG5143	Synaptobrevin/VAMP-like protein	K08511	1e-53	205	ath:AT3G54300	vesicle-associated membrane protein 72	-	-	-
fd_521	GAAC01000418	398	28	8.2702	gi|297735041|emb|CBI17403.3|	53.9	8e-10	unnamed protein product [Vitis vinifera]	--	--	--	--	--	--	--	--	--	--	--	--	--	--	-	-	-
fd_522	--	157	36	26.9554	gi|38016525|gb|AAR07598.1|	80.5	5e-15	fiber protein Fb19 [Gossypium barbadense]	--	--	--	--	--	--	--	--	--	--	--	--	--	--	-	-	-
fd_523	GAAC01000419	542	64	13.8811	gi|297741592|emb|CBI32724.3|	66.2	2e-10	unnamed protein product [Vitis vinifera]	--	--	--	--	--	--	--	--	--	--	--	--	--	--	-	-	-
fd_524	GAAC01000420	996	280	33.0477	gi|11094371|gb|AAG29596.1|AF196289_1	350	1e-165	Ser/Thr specific protein phosphatase 2A B regulatory subunit beta isoform [Medicago sativa subsp. x varia]	sp|Q39247|2ABB_ARATH	298	8e-150	Serine/threonine protein phosphatase 2A 55 kDa regulatory subunit B beta isoform OS=Arabidopsis thaliana GN=PP2AB2 PE=2 SV=1	SPAC227.07c	177	5e-89	COG5170	Serine/threonine protein phosphatase 2A, regulatory subunit	K04354	3e-168	358	vvi:100265267	protein phosphatase 2 (formerly 2A), regulatory subunit B	-	-	-
fd_525	GAAC01000421	399	112	32.9981	gi|145357850|ref|NP_196588.3|	82.8	1e-15	AtRABH1e (Arabidopsis Rab GTPase homolog H1e); GTP binding [Arabidopsis thaliana] >gi|8953407|emb|CAB96682.1| GTP-binding protein [Arabidopsis thaliana]	sp|O80501|RBH1B_ARATH	76.6	4e-14	Ras-related protein RABH1B OS=Arabidopsis thaliana GN=RABH1B PE=1 SV=1	--	--	--	--	--	K07976	3e-16	80.5	ath:AT2G22290	Rab family, other	-	-	-
fd_526	GAAC01000422	316	33	12.2764	gi|54397638|gb|AAV33690.1|	68.9	2e-11	Hcr9-OR2B [Solanum pimpinellifolium]	--	--	--	--	--	--	--	--	--	--	--	--	--	--	-	-	-
fd_527	GAAC01000423	829	193	27.3682	gi|297797191|ref|XP_002866480.1|	310	2e-83	exostosin family protein [Arabidopsis lyrata subsp. lyrata] >gi|297312315|gb|EFH42739.1| exostosin family protein [Arabidopsis lyrata subsp. lyrata]	sp|Q8H038|KATAM_ORYSJ	172	2e-42	Xyloglucan galactosyltransferase KATAMARI1 homolog OS=Oryza sativa subsp. japonica GN=Os03g0144800 PE=2 SV=1	--	--	--	--	--	--	--	--	--	--	-	-	-
fd_528	GAAC01000424	775	53	8.0393	gi|40644190|emb|CAC95126.1|	73.9	7e-18	gag-pol polyprotein [Populus deltoides]	--	--	--	--	--	--	--	--	--	--	--	--	--	--	-	-	-
fd_529	GAAC01000425	1107	196	20.8138	gi|2495155|sp|P93111.1|HEM11_CUCSA	541	1e-153	RecName: Full=Glutamyl-tRNA reductase 1, chloroplastic; Short=GluTR; Flags: Precursor >gi|1694926|dbj|BAA08910.1| glutamyl-tRNA reductase [Cucumis sativus]	sp|P93111|HEM11_CUCSA	541	3e-153	Glutamyl-tRNA reductase 1, chloroplastic OS=Cucumis sativus GN=HEMA1 PE=2 SV=1	alr1042	243	3e-64	COG0373	Glutamyl-tRNA reductase	K02492	1e-155	546	vvi:100259052	glutamyl-tRNA reductase [EC:1.2.1.70]	-	-	-
fd_530	--	181	25	16.237	--	--	--	--	--	--	--	--	--	--	--	--	--	--	--	--	--	--	-	-	-
fd_531	GAAC01000426	269	18	7.8662	--	--	--	--	--	--	--	--	--	--	--	--	--	--	--	--	--	--	-	-	-
fd_532	GAAC01000427	1632	532	38.3208	gi|297852752|ref|XP_002894257.1|	820	0	heat-intolerant 1 [Arabidopsis lyrata subsp. lyrata] >gi|297340099|gb|EFH70516.1| heat-intolerant 1 [Arabidopsis lyrata subsp. lyrata]	sp|Q5ZLD7|VPS53_CHICK	291	1e-77	Vacuolar protein sorting-associated protein 53 homolog OS=Gallus gallus GN=VPS53 PE=2 SV=1	--	--	--	--	--	--	--	--	--	--	-	-	-
fd_533	GAAC01000428	339	41	14.2176	gi|105923235|gb|ABF81465.1|	67	6e-11	TIR-NBS-LRR type disease resistance protein [Populus trichocarpa]	sp|Q40392|TMVRN_NICGU	60.8	2e-09	TMV resistance protein N OS=Nicotiana glutinosa GN=N PE=1 SV=1	--	--	--	--	--	--	--	--	--	--	-	-	-
fd_534	GAAC01000429	586	100	20.0607	gi|37625033|gb|AAQ96340.1|	317	4e-86	protein kinase-like protein [Vitis aestivalis]	sp|Q9FE20|PBS1_ARATH	250	5e-66	Serine/threonine-protein kinase PBS1 OS=Arabidopsis thaliana GN=PBS1 PE=1 SV=1	aq_576	53.9	2e-07	COG0515	Serine/threonine protein kinase	K13430	2e-72	268	pop:POPTR_413452	serine/threonine-protein kinase PBS1 [EC:2.7.11.1]	-	-	-
fd_535	GAAC01000430	271	37	16.05	gi|297817174|ref|XP_002876470.1|	149	7e-36	ketol-acid reductoisomerase [Arabidopsis lyrata subsp. lyrata] >gi|297322308|gb|EFH52729.1| ketol-acid reductoisomerase [Arabidopsis lyrata subsp. lyrata]	sp|Q05758|ILV5_ARATH	149	4e-36	Ketol-acid reductoisomerase, chloroplastic OS=Arabidopsis thaliana GN=At3g58610 PE=2 SV=2	YLR355c	50.8	6e-07	COG0059	Ketol-acid reductoisomerase	K00053	3e-37	149	ath:AT3G58610	ketol-acid reductoisomerase [EC:1.1.1.86]	-	-	-
fd_536	GAAC01000431	548	123	26.3856	gi|30689066|ref|NP_194882.2|	143	1e-33	ATEXO70G1 (exocyst subunit EXO70 family protein G1); protein binding [Arabidopsis thaliana] >gi|32347268|gb|AAP31853.1| EXO70-G1 protein [Arabidopsis thaliana]	--	--	--	--	--	--	--	--	--	K07195	7e-35	143	ath:AT4G31540	exocyst complex component 7	-	-	-
fd_537	GAAC01000432	646	52	9.4627	gi|75148783|sp|Q84WP5.1|U497A_ARATH	214	7e-55	RecName: Full=UPF0497 membrane protein At2g36330	sp|Q84WP5|U497A_ARATH	214	4e-55	UPF0497 membrane protein At2g36330 OS=Arabidopsis thaliana GN=At2g36330 PE=1 SV=1	--	--	--	--	--	--	--	--	--	--	-	-	-
fd_538	GAAC01000433	416	705	199.223	gi|115452485|ref|NP_001049843.1|	269	6e-72	Os03g0298400 [Oryza sativa Japonica Group] >gi|17297987|dbj|BAB78491.1| 26S proteasome regulatory particle triple-A ATPase subunit2b [Oryza sativa Japonica Group] >gi|113548314|dbj|BAF11757.1| Os03g0298400 [Oryza sativa Japonica Group]	sp|P46466|PRS4_ORYSJ	268	1e-71	26S protease regulatory subunit 4 homolog OS=Oryza sativa subsp. japonica GN=TBP2 PE=2 SV=2	YDL007w	217	6e-57	COG1222	ATP-dependent 26S proteasome regulatory subunit	K03062	2e-73	270	vvi:100244194	26S proteasome regulatory subunit T2	-	-	-
fd_539	GAAC01000434	776	86	13.0281	gi|225426548|ref|XP_002279130.1|	288	6e-77	PREDICTED: similar to ubiquitin carboxyl-terminal hydrolase family protein [Vitis vinifera]	sp|Q9ZSB5|UBP10_ARATH	215	2e-55	Ubiquitin carboxyl-terminal hydrolase 10 OS=Arabidopsis thaliana GN=UBP10 PE=2 SV=2	SPCC1494.05c	57.8	2e-08	COG5560	Ubiquitin C-terminal hydrolase	K11835	3e-78	288	vvi:100259769	ubiquitin carboxyl-terminal hydrolase 4/11/15 [EC:3.1.2.15]	-	-	-
fd_540	GAAC01000435	1267	379	35.1646	gi|4138343|emb|CAA09896.1|	674	0	RNA-directed RNA polymerase [Petunia x hybrida]	sp|Q0DXS3|RDR1_ORYSJ	584	5e-166	Probable RNA-dependent RNA polymerase 1 OS=Oryza sativa subsp. japonica GN=RDR1 PE=2 SV=2	--	--	--	--	--	--	--	--	--	--	-	-	-
fd_541	--	185	20	12.7087	gi|17065234|gb|AAL32771.1|	122	1e-27	similar to valyl tRNA synthetase [Arabidopsis thaliana] >gi|38564252|gb|AAR23705.1| At1g14610 [Arabidopsis thaliana]	sp|P93736|SYV_ARATH	122	7e-28	Valyl-tRNA synthetase OS=Arabidopsis thaliana GN=VALRS PE=1 SV=2	mll1104	94.7	4e-20	COG0525	Valyl-tRNA synthetase	K01873	5e-29	122	ath:AT1G14610	valyl-tRNA synthetase [EC:6.1.1.9]	-	-	-
fd_542	GAAC01000436	255	9	4.149	--	--	--	--	--	--	--	--	--	--	--	--	--	--	--	--	--	--	-	-	-
fd_543	GAAC01000437	234	32	16.076	gi|186494184|ref|NP_177125.3|	82	2e-15	CUL3B (CULLIN 3B); protein binding / ubiquitin-protein ligase [Arabidopsis thaliana]	--	--	--	--	--	--	--	--	--	K03869	2e-18	87	vvi:100254227	cullin 3	-	-	-
fd_544	GAAC01000438	346	37	12.571	gi|225461435|ref|XP_002282360.1|	90.1	7e-18	PREDICTED: hypothetical protein [Vitis vinifera] >gi|302143014|emb|CBI20309.3| unnamed protein product [Vitis vinifera]	--	--	--	--	--	--	--	--	--	--	--	--	--	--	-	-	-
fd_545	GAAC01000439	3742	564	17.7182	gi|113911589|gb|ABI48276.1|	722	0	phototropin-2 [Solanum lycopersicum]	sp|P93025|PHOT2_ARATH	631	0	Phototropin-2 OS=Arabidopsis thaliana GN=PHOT2 PE=1 SV=2	SPAC17G8.14c_2	184	1e-45	COG0515	Serine/threonine protein kinase	K08282	0	537	ath:AT3G45780	non-specific serine/threonine protein kinase [EC:2.7.11.1]	-	-	-
fd_546	GAAC01000440	240	8	3.9185	gi|42565600|ref|NP_190167.2|	132	9e-31	ferric reductase-like transmembrane component family protein [Arabidopsis thaliana] >gi|166199746|sp|Q9LZU9.2|RBOHJ_ARATH RecName: Full=Putative respiratory burst oxidase homolog protein J; AltName: Full=NADPH oxidase RBOHJ; Short=AtRBOHJ	sp|Q2HXK9|RBOHD_SOLTU	108	1e-23	Respiratory burst oxidase homolog protein D OS=Solanum tuberosum GN=RBOHD PE=1 SV=2	--	--	--	--	--	K13447	6e-26	112	vvi:100261299	respiratory burst oxidase [EC:1.6.3.- 1.11.1.-]	-	-	-
fd_547	GAAC01000441	372	17	5.3722	gi|115465954|ref|NP_001056576.1|	124	3e-45	Os06g0109400 [Oryza sativa Japonica Group] >gi|113594616|dbj|BAF18490.1| Os06g0109400 [Oryza sativa Japonica Group]	sp|Q9SS94|CD48C_ARATH	122	1e-43	Cell division control protein 48 homolog C OS=Arabidopsis thaliana GN=CDC48C PE=1 SV=2	SPBC16E9.10c	86.3	6e-26	COG0464	ATPases of the AAA+ class	K13338	8e-25	88.6	ppp:PHYPADRAFT_95675	peroxin-1	-	-	-
fd_548	--	184	14	8.9444	--	--	--	--	--	--	--	--	--	--	--	--	--	--	--	--	--	--	-	-	-
fd_549	GAAC01000442	438	29	7.7834	gi|224123318|ref|XP_002319049.1|	50.4	6e-06	predicted protein [Populus trichocarpa] >gi|222857425|gb|EEE94972.1| predicted protein [Populus trichocarpa]	--	--	--	--	--	--	--	--	--	--	--	--	--	--	-	-	-
fd_550	GAAC01000443	404	151	43.9378	gi|115449199|ref|NP_001048379.1|	258	2e-68	Os02g0794700 [Oryza sativa Japonica Group] >gi|113537910|dbj|BAF10293.1| Os02g0794700 [Oryza sativa Japonica Group]	sp|Q6K669|AMPL2_ORYSJ	258	1e-68	Leucine aminopeptidase 2, chloroplastic OS=Oryza sativa subsp. japonica GN=Os02g0794700 PE=2 SV=1	sll2001	188	3e-48	COG0260	Leucyl aminopeptidase	K01255	1e-70	261	vvi:100250183	leucyl aminopeptidase [EC:3.4.11.1]	-	-	-
fd_551	--	163	21	15.1452	gi|297791633|ref|XP_002863701.1|	111	2e-24	regulatory particle triple-a 4A [Arabidopsis lyrata subsp. lyrata] >gi|297309536|gb|EFH39960.1| regulatory particle triple-a 4A [Arabidopsis lyrata subsp. lyrata]	sp|Q9MAK9|PS10B_ARATH	111	1e-24	26S protease regulatory subunit S10B homolog B OS=Arabidopsis thaliana GN=RPT4B PE=2 SV=1	SPCC1682.16	85.5	2e-17	COG1222	ATP-dependent 26S proteasome regulatory subunit	K03064	9e-26	111	vvi:100252341	26S proteasome regulatory subunit T4	-	-	-
fd_552	GAAC01000444	204	33	19.0163	gi|297839995|ref|XP_002887879.1|	56.2	1e-07	RWP-RK domain-containing protein [Arabidopsis lyrata subsp. lyrata] >gi|297333720|gb|EFH64138.1| RWP-RK domain-containing protein [Arabidopsis lyrata subsp. lyrata]	--	--	--	--	--	--	--	--	--	--	--	--	--	--	-	-	-
fd_553	GAAC01000445	633	89	16.5283	gi|121308621|dbj|BAF43703.1|	249	1e-65	Chlorophyllase 1 [Glycine max]	sp|Q9M7I7|CLH2_ARATH	214	3e-55	Chlorophyllase-2, chloroplastic OS=Arabidopsis thaliana GN=CLH2 PE=1 SV=1	MA1571	49.3	5e-06	COG0412	Dienelactone hydrolase and related enzymes	K08099	3e-56	214	ath:AT5G43860	chlorophyllase [EC:3.1.1.14]	-	-	-
fd_554	GAAC01000446	245	15	7.1973	gi|297833180|ref|XP_002884472.1|	86.7	8e-17	pseudouridylate synthase [Arabidopsis lyrata subsp. lyrata] >gi|297330312|gb|EFH60731.1| pseudouridylate synthase [Arabidopsis lyrata subsp. lyrata]	--	--	--	--	--	--	--	--	--	--	--	--	--	--	-	-	-
fd_555	GAAC01000447	718	182	29.7982	gi|79314149|ref|NP_001030808.1|	441	1e-123	CEF (clone eighty-four); protein binding / transporter/ zinc ion binding [Arabidopsis thaliana]	sp|Q9M291|SC24C_ARATH	441	2e-123	Protein transport protein Sec24-like CEF OS=Arabidopsis thaliana GN=CEF PE=1 SV=2	SPAC22F8.08	154	1e-37	COG5028	Vesicle coat complex COPII, subunit SEC24/subunit SFB2/subunit SFB3	--	--	--	--	--	-	-	-
fd_556	GAAC01000448	362	87	28.2523	gi|297827869|ref|XP_002881817.1|	199	8e-51	phospholipase D beta 1 [Arabidopsis lyrata subsp. lyrata] >gi|297327656|gb|EFH58076.1| phospholipase D beta 1 [Arabidopsis lyrata subsp. lyrata]	sp|O23078|PLDB2_ARATH	191	2e-48	Phospholipase D beta 2 OS=Arabidopsis thaliana GN=PLDBETA2 PE=2 SV=2	--	--	--	--	--	K01115	1e-51	197	ath:AT2G42010	phospholipase D [EC:3.1.4.4]	-	-	-
fd_557	--	189	70	43.5391	gi|18421489|ref|NP_568530.1|	118	2e-26	EXS family protein / ERD1/XPR1/SYG1 family protein [Arabidopsis thaliana]	--	--	--	--	--	--	--	--	--	--	--	--	--	--	-	-	-
fd_558	GAAC01000449	608	99	19.1414	gi|224129122|ref|XP_002320506.1|	104	6e-22	f-box family protein [Populus trichocarpa] >gi|222861279|gb|EEE98821.1| f-box family protein [Populus trichocarpa]	sp|Q9SFC7|FB135_ARATH	71.2	4e-12	F-box protein At3g07870 OS=Arabidopsis thaliana GN=At3g07870 PE=2 SV=1	--	--	--	--	--	--	--	--	--	--	-	-	-
fd_559	GAAC01000450	527	36	8.0304	gi|226508052|ref|NP_001150337.1|	153	1e-51	LOC100283967 [Zea mays] >gi|195638522|gb|ACG38729.1| aspartic proteinase nepenthesin-2 precursor [Zea mays]	sp|Q9S9K4|ASPL2_ARATH	85.1	1e-21	Aspartic proteinase-like protein 2 OS=Arabidopsis thaliana GN=At1g65240 PE=1 SV=2	--	--	--	--	--	K00924	2e-40	161	ath:AT5G22850	[EC:2.7.1.-]	-	-	-
fd_560	GAAC01000451	330	24	8.5495	gi|226506418|ref|NP_001150861.1|	49.7	1e-11	rhodopsin-like receptor [Zea mays] >gi|195642436|gb|ACG40686.1| rhodopsin-like receptor [Zea mays]	--	--	--	--	--	--	--	--	--	--	--	--	--	--	-	-	-
fd_561	GAAC01000452	585	130	26.1235	gi|115436952|ref|NP_001043176.1|	204	4e-52	Os01g0512100 [Oryza sativa Japonica Group] >gi|113532707|dbj|BAF05090.1| Os01g0512100 [Oryza sativa Japonica Group]	sp|Q9ZSY2|DNJ15_ARATH	200	4e-51	Chaperone protein dnaJ 15 OS=Arabidopsis thaliana GN=ATJ15 PE=1 SV=1	alr2447	89.7	3e-18	COG0484	DnaJ-class molecular chaperone with C-terminal Zn finger domain	K03686	1e-16	83.2	pop:POPTR_862529	molecular chaperone DnaJ	-	-	-
fd_562	GAAC01000453	376	57	17.8209	gi|225437164|ref|XP_002274787.1|	104	1e-30	PREDICTED: similar to type IIB calcium ATPase [Vitis vinifera]	sp|Q9LF79|ACA8_ARATH	69.3	6e-16	Calcium-transporting ATPase 8, plasma membrane-type OS=Arabidopsis thaliana GN=ACA8 PE=1 SV=1	--	--	--	--	--	K01537	1e-25	89	ath:AT3G22910	Ca2+-transporting ATPase [EC:3.6.3.8]	-	-	-
fd_563	GAAC01000454	743	181	28.6374	--	--	--	--	--	--	--	--	--	--	--	--	--	--	--	--	--	--	-	-	-
fd_564	GAAC01000455	738	159	25.327	gi|297849236|ref|XP_002892499.1|	150	2e-35	agenet domain-containing protein [Arabidopsis lyrata subsp. lyrata] >gi|297338341|gb|EFH68758.1| agenet domain-containing protein [Arabidopsis lyrata subsp. lyrata]	--	--	--	--	--	--	--	--	--	--	--	--	--	--	-	-	-
fd_565	GAAC01000456	728	161	25.9979	gi|15242346|ref|NP_197065.1|	281	5e-75	proteasome family protein [Arabidopsis thaliana]	sp|Q54KZ8|EIF3M_DICDI	84	9e-16	Eukaryotic translation initiation factor 3 subunit M OS=Dictyostelium discoideum GN=eif3m PE=1 SV=1	--	--	--	--	--	--	--	--	--	--	-	-	-
fd_566	GAAC01000457	402	48	14.0365	gi|117940159|sp|P93051.2|ERDL7_ARATH	209	6e-54	RecName: Full=Sugar transporter ERD6-like 7	sp|P93051|ERDL7_ARATH	209	3e-54	Sugar transporter ERD6-like 7 OS=Arabidopsis thaliana GN=At2g48020 PE=2 SV=2	BS_araE	76.6	1e-14	COG0477	Permeases of the major facilitator superfamily	--	--	--	--	--	-	-	-
fd_567	GAAC01000458	221	24	12.7662	gi|29427830|sp|Q8LPB4.1|PSKR1_DAUCA	67.8	4e-11	RecName: Full=Phytosulfokine receptor 1; Short=DcPSKR1; AltName: Full=Phytosulfokine LRR receptor kinase 1; Flags: Precursor >gi|21623969|dbj|BAC00995.1| phytosulfokine receptor [Daucus carota]	sp|Q8LPB4|PSKR1_DAUCA	67.8	2e-11	Phytosulfokine receptor 1 OS=Daucus carota GN=PSKR PE=1 SV=1	--	--	--	--	--	K13420	1e-07	51.2	osa:4337016	LRR receptor-like serine/threonine-protein kinase FLS2 [EC:2.7.11.1]	-	-	-
fd_568	GAAC01000459	311	13	4.9139	gi|51477379|gb|AAU04752.1|	50.4	6e-06	DRP [Cucumis melo]	--	--	--	--	--	--	--	--	--	--	--	--	--	--	-	-	-
fd_569	GAAC01000460	473	117	29.0782	gi|7105717|gb|AAB84202.2|	289	8e-78	plasma membrane proton ATPase [Kosteletzkya virginica]	sp|Q9SH76|PMA6_ARATH	288	1e-77	ATPase 6, plasma membrane-type OS=Arabidopsis thaliana GN=AHA6 PE=2 SV=1	MA2833	121	6e-28	COG0474	Cation transport ATPase	K01535	1e-78	288	ath:AT2G07560	H+-transporting ATPase [EC:3.6.3.6]	-	-	-
fd_570	GAAC01000461	261	9	4.0536	gi|297610881|ref|NP_001065317.2|	126	8e-29	Os10g0550300 [Oryza sativa Japonica Group] >gi|255679608|dbj|BAF27154.2| Os10g0550300 [Oryza sativa Japonica Group]	sp|Q9LQ89|ROGF2_ARATH	117	2e-26	Rop guanine nucleotide exchange factor 2 OS=Arabidopsis thaliana GN=ROPGEF2 PE=1 SV=2	--	--	--	--	--	--	--	--	--	--	-	-	-
fd_571	GAAC01000462	242	26	12.6299	gi|18395326|ref|NP_564209.1|	70.1	7e-12	NHL repeat-containing protein [Arabidopsis thaliana] >gi|15724248|gb|AAL06517.1|AF412064_1 At1g23890/T23E23_13 [Arabidopsis thaliana] >gi|16974539|gb|AAL31179.1| At1g23890/T23E23_13 [Arabidopsis thaliana]	--	--	--	--	--	--	--	--	--	--	--	--	--	--	-	-	-
fd_572	GAAC01000463	869	151	20.4268	gi|161598361|gb|ABX74942.1|	369	1e-101	pyruvate orthophosphate dikinase regulatory protein [Glycine max]	sp|O49562|PDRP1_ARATH	352	1e-96	Pyruvate, phosphate dikinase regulatory protein 1, chloroplastic OS=Arabidopsis thaliana GN=RP1 PE=2 SV=1	BS_yqfL	145	7e-35	COG1806	Uncharacterized protein conserved in bacteria	K09773	6e-114	407	vvi:100267490	hypothetical protein	-	-	-
fd_573	--	456	80	20.6238	gi|115489134|ref|NP_001067054.1|	82.4	2e-15	Os12g0566500 [Oryza sativa Japonica Group] >gi|113649561|dbj|BAF30073.1| Os12g0566500 [Oryza sativa Japonica Group]	--	--	--	--	--	--	--	--	--	--	--	--	--	--	-	-	-
fd_574	GAAC01000464	299	14	5.5043	--	--	--	--	--	--	--	--	--	--	--	--	--	--	--	--	--	--	-	-	-
fd_575	GAAC01000465	277	72	30.556	--	--	--	--	--	--	--	--	--	--	--	--	--	--	--	--	--	--	-	-	-
fd_576	GAAC01000466	244	7	3.3725	gi|147790037|emb|CAN60525.1|	52.8	1e-06	hypothetical protein [Vitis vinifera]	--	--	--	--	--	--	--	--	--	--	--	--	--	--	-	-	-
fd_577	GAAC01000467	269	40	17.4804	gi|115470525|ref|NP_001058861.1|	57	6e-08	Os07g0139600 [Oryza sativa Japonica Group] >gi|113610397|dbj|BAF20775.1| Os07g0139600 [Oryza sativa Japonica Group]	sp|P62121|RL41_TOBAC	53.9	3e-07	60S ribosomal protein L41 OS=Nicotiana tabacum GN=RPL41 PE=3 SV=1	--	--	--	--	--	K02928	3e-09	57	osa:4342366	large subunit ribosomal protein L41e	-	-	-
fd_578	GAAC01000468	344	19	6.4929	gi|224107941|ref|XP_002314662.1|	105	2e-22	autoinhibited calcium ATPase [Populus trichocarpa] >gi|222863702|gb|EEF00833.1| autoinhibited calcium ATPase [Populus trichocarpa]	sp|Q9LF79|ACA8_ARATH	75.1	1e-13	Calcium-transporting ATPase 8, plasma membrane-type OS=Arabidopsis thaliana GN=ACA8 PE=1 SV=1	BS_yloB	54.3	5e-08	COG0474	Cation transport ATPase	K01537	3e-22	99.8	ath:AT3G22910	Ca2+-transporting ATPase [EC:3.6.3.8]	-	-	-
fd_579	GAAC01000469	548	93	19.9501	gi|148828535|gb|ABR13881.1|	134	6e-44	arginase [Malus hupehensis]	sp|P46637|ARGI1_ARATH	131	3e-43	Arginase OS=Arabidopsis thaliana GN=At4g08900 PE=2 SV=1	MJ0309	47.4	1e-09	COG0010	Arginase/agmatinase/formimionoglutamate hydrolase, arginase family	K01476	3e-44	131	ath:AT4G08900	arginase [EC:3.5.3.1]	-	-	-
fd_580	GAAC01000470	204	7	4.0338	--	--	--	--	--	--	--	--	--	--	--	--	--	--	--	--	--	--	-	-	-
fd_581	GAAC01000471	362	122	39.6182	gi|297607562|ref|NP_001060171.2|	36.6	9e-06	Os07g0596300 [Oryza sativa Japonica Group] >gi|255677941|dbj|BAF22085.2| Os07g0596300 [Oryza sativa Japonica Group]	sp|Q84ZL0|FH5_ORYSJ	36.6	5e-06	Formin-like protein 5 OS=Oryza sativa subsp. japonica GN=FH5 PE=2 SV=2	--	--	--	--	--	--	--	--	--	--	-	-	-
fd_582	GAAC01000472	435	26	7.0263	gi|15220899|ref|NP_177891.1|	98.2	3e-20	ribonuclease II family protein [Arabidopsis thaliana]	--	--	--	--	--	--	--	--	--	--	--	--	--	--	-	-	-
fd_583	GAAC01000473	402	98	28.6578	gi|195637066|gb|ACG38001.1|	217	4e-56	argininosuccinate synthase [Zea mays]	sp|Q9SZX3|ASSY_ARATH	209	3e-54	Argininosuccinate synthase, chloroplastic OS=Arabidopsis thaliana GN=At4g24830 PE=2 SV=3	VC2642	167	6e-42	COG0137	Argininosuccinate synthase	K01940	2e-62	234	vvi:100266261	argininosuccinate synthase [EC:6.3.4.5]	-	-	-
fd_584	GAAC01000474	684	214	36.7791	gi|18409922|ref|NP_565026.1|	354	5e-97	SEC6 [Arabidopsis thaliana]	sp|Q54BP6|EXOC3_DICDI	103	1e-21	Exocyst complex component 3 OS=Dictyostelium discoideum GN=exoc3 PE=3 SV=1	--	--	--	--	--	--	--	--	--	--	-	-	-
fd_585	GAAC01000475	255	9	4.149	--	--	--	--	--	--	--	--	--	--	--	--	--	--	--	--	--	--	-	-	-
fd_586	GAAC01000476	598	189	37.1538	gi|78099801|sp|Q9SFU0.2|SC24A_ARATH	364	1e-100	RecName: Full=Protein transport protein Sec24-like At3g07100	sp|Q9SFU0|SC24A_ARATH	364	2e-100	Protein transport protein Sec24-like At3g07100 OS=Arabidopsis thaliana GN=At3g07100 PE=1 SV=2	SPAC22F8.08	147	9e-36	COG5028	Vesicle coat complex COPII, subunit SEC24/subunit SFB2/subunit SFB3	--	--	--	--	--	-	-	-
fd_587	GAAC01000477	281	71	29.7027	gi|284433794|gb|ADB85103.1|	129	1e-29	glutathione S-transferase omega [Jatropha curcas]	sp|Q8H8U5|IN21B_ORYSJ	98.6	1e-20	Protein IN2-1 homolog B OS=Oryza sativa subsp. japonica GN=GSTZ5 PE=2 SV=1	--	--	--	--	--	K00799	7e-20	92	osa:4332456	glutathione S-transferase [EC:2.5.1.18]	-	-	-
fd_588	GAAC01000478	486	87	21.0439	gi|67460954|sp|Q8H0M1.1|QORH_SPIOL	238	2e-62	RecName: Full=Quinone-oxidoreductase homolog, chloroplastic; AltName: Full=ceQORH >gi|24370984|emb|CAD54431.1| quinone-oxidoreductase homologue [Spinacia oleracea]	sp|Q8H0M1|QORH_SPIOL	238	1e-62	Quinone-oxidoreductase homolog, chloroplastic OS=Spinacia oleracea GN=QOR PE=1 SV=1	mll2116	67.8	8e-12	COG0604	NADPH:quinone reductase and related Zn-dependent oxidoreductases	K07119	6e-11	63.5	ath:AT1G49670		-	-	-
fd_589	GAAC01000479	533	62	13.6744	gi|297802104|ref|XP_002868936.1|	322	2e-87	ubiquitin-specific protease 3 [Arabidopsis lyrata subsp. lyrata] >gi|297314772|gb|EFH45195.1| ubiquitin-specific protease 3 [Arabidopsis lyrata subsp. lyrata]	sp|O24454|UBP3_ARATH	322	1e-87	Ubiquitin carboxyl-terminal hydrolase 3 OS=Arabidopsis thaliana GN=UBP3 PE=1 SV=1	SPBC18H10.08c	74.7	8e-14	COG5533	Ubiquitin C-terminal hydrolase	K11842	5e-92	333	vvi:100253110	ubiquitin carboxyl-terminal hydrolase 12/46 [EC:3.1.2.15]	-	-	-
fd_590	GAAC01000480	464	68	17.228	gi|222424278|dbj|BAH20096.1|	63.9	6e-10	AT3G01130 [Arabidopsis thaliana]	--	--	--	--	--	--	--	--	--	--	--	--	--	--	-	-	-
fd_591	GAAC01000481	489	26	6.2504	gi|147801054|emb|CAN77850.1|	48.9	2e-13	hypothetical protein [Vitis vinifera]	--	--	--	--	--	--	--	--	--	K00558	2e-10	43.1	vvi:100255190	DNA (cytosine-5-)-methyltransferase [EC:2.1.1.37]	-	-	-
fd_592	GAAC01000482	1637	434	31.1662	gi|297826489|ref|XP_002881127.1|	673	0	RabGAP/TBC domain-containing protein [Arabidopsis lyrata subsp. lyrata] >gi|297326966|gb|EFH57386.1| RabGAP/TBC domain-containing protein [Arabidopsis lyrata subsp. lyrata]	sp|Q8WUA7|TB22A_HUMAN	332	5e-90	TBC1 domain family member 22A OS=Homo sapiens GN=TBC1D22A PE=1 SV=2	ECU04g1530	116	1e-25	COG5210	GTPase-activating protein	--	--	--	--	--	-	-	-
fd_593	GAAC01000483	278	26	10.9944	gi|18424516|ref|NP_568941.1|	78.2	3e-14	GUT1; catalytic/ glucuronoxylan glucuronosyltransferase [Arabidopsis thaliana] >gi|15809826|gb|AAL06841.1| AT5g61840/mac9_140 [Arabidopsis thaliana] >gi|17978869|gb|AAL47406.1| AT5g61840/mac9_140 [Arabidopsis thaliana]	--	--	--	--	--	--	--	--	--	--	--	--	--	--	-	-	-
fd_594	GAAC01000484	237	8	3.9681	gi|224073770|ref|XP_002304164.1|	145	2e-34	anion exchanger family protein [Populus trichocarpa] >gi|222841596|gb|EEE79143.1| anion exchanger family protein [Populus trichocarpa]	sp|Q8VYR7|BOR1_ARATH	129	7e-30	Boron transporter 1 OS=Arabidopsis thaliana GN=BOR1 PE=1 SV=1	--	--	--	--	--	--	--	--	--	--	-	-	-
fd_595	GAAC01000485	450	68	17.764	gi|297811519|ref|XP_002873643.1|	72.4	2e-12	ATEXO70C2 [Arabidopsis lyrata subsp. lyrata] >gi|297319480|gb|EFH49902.1| ATEXO70C2 [Arabidopsis lyrata subsp. lyrata]	--	--	--	--	--	--	--	--	--	K07195	1e-13	72.4	ath:AT5G13990	exocyst complex component 7	-	-	-
fd_596	--	198	13	7.7183	--	--	--	--	--	--	--	--	--	--	--	--	--	--	--	--	--	--	-	-	-
fd_597	GAAC01000486	451	120	31.2786	gi|15225447|ref|NP_178985.1|	261	2e-69	ATCHX15; monovalent cation:proton antiporter/ sodium:hydrogen antiporter [Arabidopsis thaliana] >gi|75313480|sp|Q9SIT5.1|CHX15_ARATH RecName: Full=Cation/H(+) antiporter 15; AltName: Full=Protein CATION/H+ EXCHANGER 15; Short=AtCHX15 >gi|61658321|gb|AAX49544.1| cation/H+ exchanger [Arabidopsis thaliana]	sp|O22920|CHX13_ARATH	134	2e-31	K(+)/H(+) antiporter 13 OS=Arabidopsis thaliana GN=CHX13 PE=1 SV=1	--	--	--	--	--	--	--	--	--	--	-	-	-
fd_598	--	2117	500	27.7647	gi|75274192|sp|Q9LU89.1|2A5N_ARATH	619	0	RecName: Full=Serine/threonine protein phosphatase 2A 59 kDa regulatory subunit B' eta isoform; Short=PP2A, B' subunit, eta isoform; Short=AtB' eta >gi|14194123|gb|AAK56256.1|AF367267_1 AT3g26020/MPE11_17 [Arabidopsis thaliana] >gi|9279607|dbj|BAB01065.1| protein phosphatase 2A regulatory subunit B' [Arabidopsis thaliana] >gi|16323340|gb|AAL15383.1| AT3g26020/MPE11_17 [Arabidopsis thaliana] >gi|2…	sp|Q9LU89|2A5N_ARATH	619	0	Serine/threonine protein phosphatase 2A 59 kDa regulatory subunit B' eta isoform OS=Arabidopsis thaliana GN=B'ETA PE=2 SV=1	--	--	--	--	--	K11584	0	682	vvi:100250839	protein phosphatase 2 (formerly 2A), regulatory subunit B'	-	-	-
fd_599	--	154	12	9.1602	gi|27901712|gb|AAO26691.1|AF478379_1	51.2	4e-06	gag-pol polyprotein [Vitis vinifera]	--	--	--	--	--	--	--	--	--	--	--	--	--	--	-	-	-
fd_600	GAAC01000487	312	58	21.8533	--	--	--	--	--	--	--	--	--	--	--	--	--	--	--	--	--	--	-	-	-
fd_601	GAAC01000488	1318	226	20.1575	gi|225458346|ref|XP_002281672.1|	468	1e-137	PREDICTED: similar to catalytic [Vitis vinifera]	sp|Q9SUK9|P2C55_ARATH	419	3e-122	Probable protein phosphatase 2C 55 OS=Arabidopsis thaliana GN=At4g16580 PE=2 SV=2	SPAC1556.03	102	2e-21	COG0631	Serine/threonine protein phosphatase	--	--	--	--	--	-	-	-
fd_602	--	187	25	15.716	gi|416755|sp|P32290.1|CATA_PHAAU	92	2e-18	RecName: Full=Catalase >gi|218322|dbj|BAA02755.1| catalase [Vigna radiata var. radiata]	sp|P32290|CATA_PHAAU	92	1e-18	Catalase OS=Phaseolus aureus PE=2 SV=1	--	--	--	--	--	K03781	5e-20	92.4	vvi:100244516	catalase [EC:1.11.1.6]	-	-	-
fd_603	GAAC01000489	1155	193	19.6435	gi|297812101|ref|XP_002873934.1|	498	1e-140	carbohydrate kinase family [Arabidopsis lyrata subsp. lyrata] >gi|297319771|gb|EFH50193.1| carbohydrate kinase family [Arabidopsis lyrata subsp. lyrata]	sp|Q8IW45|CARKD_HUMAN	263	1e-69	Carbohydrate kinase domain-containing protein OS=Homo sapiens GN=CARKD PE=1 SV=1	SPCC61.03	233	6e-61	COG0063	Predicted sugar kinase	--	--	--	--	--	-	-	-
fd_604	GAAC01000490	260	52	23.5111	--	--	--	--	--	--	--	--	--	--	--	--	--	--	--	--	--	--	-	-	-
fd_605	--	866	152	20.6333	gi|4210948|gb|AAD12055.1|	416	1e-115	DnaJ protein [Hevea brasiliensis]	sp|P42824|DNJH2_ALLPO	410	4e-114	DnaJ protein homolog 2 OS=Allium porrum GN=LDJ2 PE=2 SV=1	SPBC1734.11	243	2e-64	COG0484	DnaJ-class molecular chaperone with C-terminal Zn finger domain	K09503	2e-119	425	vvi:100242705	DnaJ homolog subfamily A member 2	-	-	-
fd_606	GAAC01000491	536	92	20.1774	gi|18766642|gb|AAL79042.1|AF469649_1	159	2e-38	NIMA-related protein kinase [Populus tremula x Populus alba]	sp|Q8RXT4|NEK4_ARATH	98.6	2e-20	Serine/threonine-protein kinase Nek4 OS=Arabidopsis thaliana GN=NEK4 PE=2 SV=1	--	--	--	--	--	K08857	9e-41	162	vvi:100241803	NIMA (never in mitosis gene a)-related kinase [EC:2.7.11.1]	-	-	-
fd_607	GAAC01000492	742	170	26.9332	gi|115472201|ref|NP_001059699.1|	218	1e-100	Os07g0496000 [Oryza sativa Japonica Group] >gi|24059912|dbj|BAC21376.1| GTP-binding protein Rab6 [Oryza sativa Japonica Group] >gi|113611235|dbj|BAF21613.1| Os07g0496000 [Oryza sativa Japonica Group]	sp|O80501|RBH1B_ARATH	217	3e-100	Ras-related protein RABH1B OS=Arabidopsis thaliana GN=RABH1B PE=1 SV=1	SPAC18G6.03	95.9	3e-29	COG1100	GTPase SAR1 and related small G proteins	K07976	8e-102	218	osa:4343293	Rab family, other	-	-	-
fd_608	GAAC01000493	221	18	9.5747	gi|255580943|ref|XP_002531290.1|	80.1	7e-15	protein with unknown function [Ricinus communis] >gi|223529123|gb|EEF31103.1| protein with unknown function [Ricinus communis]	--	--	--	--	--	--	--	--	--	--	--	--	--	--	-	-	-
fd_609	GAAC01000494	378	19	5.9089	gi|42573567|ref|NP_974880.1|	81.6	2e-15	SUVR2; histone-lysine N-methyltransferase/ zinc ion binding [Arabidopsis thaliana]	sp|Q9FNC7|SUVR2_ARATH	80.9	2e-15	Histone-lysine N-methyltransferase SUVR2 OS=Arabidopsis thaliana GN=SUVR2 PE=2 SV=2	--	--	--	--	--	--	--	--	--	--	-	-	-
fd_610	GAAC01000495	228	15	7.7339	--	--	--	--	--	--	--	--	--	--	--	--	--	--	--	--	--	--	-	-	-
fd_611	GAAC01000496	910	214	27.6449	gi|30680320|ref|NP_187406.2|	171	1e-41	far-red impaired responsive family protein / FAR1 family protein [Arabidopsis thaliana]	sp|Q9SZL8|FRS5_ARATH	118	6e-26	Protein FAR1-RELATED SEQUENCE 5 OS=Arabidopsis thaliana GN=FRS5 PE=2 SV=1	--	--	--	--	--	--	--	--	--	--	-	-	-
fd_612	--	175	68	45.6787	gi|53689728|gb|AAU89742.1|	111	2e-24	serine/threonine protein kinase-like [Solanum tuberosum]	sp|O48814|BIK1_ARATH	63.2	5e-10	Serine/threonine-protein kinase BIK1 OS=Arabidopsis thaliana GN=BIK1 PE=1 SV=1	--	--	--	--	--	K00924	5e-11	62.8	osa:4337593	[EC:2.7.1.-]	-	-	-
fd_613	GAAC01000497	746	56	8.8245	gi|115445873|ref|NP_001046716.1|	54.7	2e-13	Os02g0329300 [Oryza sativa Japonica Group] >gi|113536247|dbj|BAF08630.1| Os02g0329300 [Oryza sativa Japonica Group]	--	--	--	--	--	--	--	--	--	--	--	--	--	--	-	-	-
fd_614	GAAC01000498	799	282	41.4902	gi|22331720|ref|NP_190556.2|	344	8e-94	ATARLA1C (ADP-ribosylation factor-like A1C); GTP binding [Arabidopsis thaliana] >gi|18252989|gb|AAL62421.1| ADP-RIBOSYLATION FACTOR -like protein [Arabidopsis thaliana] >gi|21389677|gb|AAM48037.1| ADP-ribosylation factor-like protein [Arabidopsis thaliana]	sp|Q5ZKQ8|ARL8A_CHICK	263	8e-70	ADP-ribosylation factor-like protein 8A OS=Gallus gallus GN=ARL8A PE=2 SV=1	YDL137w	110	3e-24	COG1100	GTPase SAR1 and related small G proteins	K07977	4e-95	344	ath:AT3G49870	Arf/Sar family, other	-	-	-
fd_615	GAAC01000499	799	286	42.0787	gi|75213194|sp|Q9SX85.1|SEC3A_ARATH	463	1e-130	RecName: Full=Exocyst complex component SEC3A >gi|5668806|gb|AAD46032.1|AC007519_17 Strong similarity to F16N3.17 from Arabidopsis thalian BAC gb|AC007519 [Arabidopsis thaliana]	sp|Q9SX85|SEC3A_ARATH	463	5e-130	Exocyst complex component SEC3A OS=Arabidopsis thaliana GN=SEC3A PE=2 SV=1	--	--	--	--	--	--	--	--	--	--	-	-	-
fd_616	GAAC01000500	823	65	9.2845	gi|297821134|ref|XP_002878450.1|	320	1e-86	zinc knuckle (CCHC-type) family protein [Arabidopsis lyrata subsp. lyrata] >gi|297324288|gb|EFH54709.1| zinc knuckle (CCHC-type) family protein [Arabidopsis lyrata subsp. lyrata]	--	--	--	--	--	--	--	--	--	--	--	--	--	--	-	-	-
fd_617	GAAC01000501	2069	1104	62.7266	gi|3024697|sp|O04450.1|TCPE_ARATH	979	0	RecName: Full=T-complex protein 1 subunit epsilon; Short=TCP-1-epsilon; AltName: Full=CCT-epsilon >gi|9743353|gb|AAF97977.1|AC000103_27 F21J9.17 [Arabidopsis thaliana] >gi|19715605|gb|AAL91625.1| At1g24510/F21J9_150 [Arabidopsis thaliana] >gi|23463047|gb|AAN33193.1| At1g24510/F21J9_150 [Arabidopsis thaliana]	sp|O04450|TCPE_ARATH	979	0	T-complex protein 1 subunit epsilon OS=Arabidopsis thaliana GN=At1g24510 PE=2 SV=1	SPAC1420.02c	707	0	COG0459	Chaperonin GroEL (HSP60 family)	K09497	0	999	vvi:100264594	T-complex protein 1 subunit epsilon	-	-	-
fd_618	GAAC01000502	718	87	14.2442	gi|224137500|ref|XP_002322573.1|	328	3e-89	cinnamyl alcohol dehydrogenase-like protein [Populus trichocarpa] >gi|222867203|gb|EEF04334.1| cinnamyl alcohol dehydrogenase-like protein [Populus trichocarpa]	sp|Q9CAI3|CADH1_ARATH	319	1e-86	Probable cinnamyl alcohol dehydrogenase 1 OS=Arabidopsis thaliana GN=CAD1 PE=2 SV=1	AGc2867	204	9e-53	COG1064	Zn-dependent alcohol dehydrogenases	K00083	2e-56	215	ath:AT4G37970	cinnamyl-alcohol dehydrogenase [EC:1.1.1.195]	-	-	-
fd_619	GAAC01000503	248	7	3.3181	gi|82791812|gb|ABB90835.1|	152	1e-36	VHS and GAT domain protein [Glycine max]	sp|Q9JJ50|HGS_RAT	55.8	8e-08	Hepatocyte growth factor-regulated tyrosine kinase substrate OS=Rattus norvegicus GN=Hgs PE=1 SV=1	--	--	--	--	--	--	--	--	--	--	-	-	-
fd_620	GAAC01000504	448	721	189.191	gi|297721251|ref|NP_001172988.1|	147	4e-35	Os02g0517531 [Oryza sativa Japonica Group] >gi|88193639|dbj|BAE79766.1| MEI2-like RNA binding protein [Oryza sativa Japonica Group] >gi|255670944|dbj|BAH91717.1| Os02g0517531 [Oryza sativa Japonica Group]	sp|P08965|MEI2_SCHPO	64.3	3e-10	Meiosis protein mei2 OS=Schizosaccharomyces pombe GN=mei2 PE=1 SV=1	--	--	--	--	--	--	--	--	--	--	-	-	-
fd_621	GAAC01000505	292	70	28.1811	gi|75146761|sp|Q84K11.1|PPP5_SOLLC	197	4e-50	RecName: Full=Serine/threonine-protein phosphatase 5; AltName: Full=LePP5 >gi|28141004|gb|AAO26213.1| type 5 protein serine/threonine phosphatase 62 kDa isoform [Solanum lycopersicum] >gi|28141085|gb|AAO26215.1| type 5 protein serine/threonine phosphatase 62 kDa isoform [Solanum lycopersicum]	sp|Q84K11|PPP5_SOLLC	197	2e-50	Serine/threonine-protein phosphatase 5 OS=Solanum lycopersicum GN=PP5 PE=1 SV=1	SPBC3F6.01c_2	135	2e-32	COG0639	Diadenosine tetraphosphatase and related serine/threonine protein phosphatases	K04460	5e-50	192	rcu:RCOM_1195150	protein phosphatase 5 [EC:3.1.3.16]	-	-	-
fd_622	GAAC01000506	226	8	4.1613	gi|297792499|ref|XP_002864134.1|	102	1e-21	pfkB-type carbohydrate kinase family protein [Arabidopsis lyrata subsp. lyrata] >gi|297309969|gb|EFH40393.1| pfkB-type carbohydrate kinase family protein [Arabidopsis lyrata subsp. lyrata]	sp|Q0JGZ6|SCRK1_ORYSJ	90.9	2e-18	Fructokinase-1 OS=Oryza sativa subsp. japonica GN=FRK1 PE=1 SV=2	BS_ydjE	58.2	4e-09	COG0524	Sugar kinases, ribokinase family	K00847	2e-23	103	pop:POPTR_570537	fructokinase [EC:2.7.1.4]	-	-	-
fd_623	--	154	190	145.036	gi|56694504|gb|AAW22989.1|	80.1	7e-15	anthraniloyal-CoA: methanol anthraniloyal transferase [Vitis labrusca]	sp|Q94CD1|HHT1_ARATH	62.4	8e-10	Omega-hydroxypalmitate O-feruloyl transferase OS=Arabidopsis thaliana GN=HHT1 PE=1 SV=1	--	--	--	--	--	K13065	7e-07	48.9	pop:POPTR_554899	shikimate O-hydroxycinnamoyltransferase [EC:2.3.1.133]	-	-	-
fd_624	GAAC01000507	509	83	19.1692	gi|297793271|ref|XP_002864520.1|	183	7e-46	kinase family protein [Arabidopsis lyrata subsp. lyrata] >gi|297310355|gb|EFH40779.1| kinase family protein [Arabidopsis lyrata subsp. lyrata]	sp|Q60700|M3K12_MOUSE	89	1e-17	Mitogen-activated protein kinase kinase kinase 12 OS=Mus musculus GN=Map3k12 PE=1 SV=1	--	--	--	--	--	K04424	3e-12	68.2	ath:AT5G11850	sterile alpha motif and leucine zipper containing kinase AZK [EC:2.7.11.25]	-	-	-
fd_625	GAAC01000508	1488	502	39.6592	gi|238478705|ref|NP_001154388.1|	307	2e-82	RCD1 (RADICAL-INDUCED CELL DEATH1); protein binding [Arabidopsis thaliana]	--	--	--	--	--	--	--	--	--	--	--	--	--	--	-	-	-
fd_626	--	384	39	11.9392	gi|88771151|gb|ABD52125.1|	82.8	1e-15	dirigent-like protein pDIR14 [Picea engelmannii x Picea glauca]	--	--	--	--	--	--	--	--	--	--	--	--	--	--	-	-	-
fd_627	GAAC01000509	284	59	24.4218	gi|297611254|ref|NP_001065767.2|	120	5e-27	Os11g0151500 [Oryza sativa Japonica Group] >gi|255679797|dbj|BAF27612.2| Os11g0151500 [Oryza sativa Japonica Group]	--	--	--	--	--	--	--	--	--	--	--	--	--	--	-	-	-
fd_628	GAAC01000510	507	45	10.4339	gi|223452621|gb|ACM89637.1|	86.3	1e-35	NBS-LRR type disease resistance protein [Glycine max]	sp|Q39214|RPM1_ARATH	48.1	1e-11	Disease resistance protein RPM1 OS=Arabidopsis thaliana GN=RPM1 PE=1 SV=1	--	--	--	--	--	K13457	1e-23	63.9	vvi:100252764	disease resistance protein RPM1	-	-	-
fd_629	--	199	32	18.9034	--	--	--	--	--	--	--	--	--	--	--	--	--	--	--	--	--	--	-	-	-
fd_630	GAAC01000511	340	181	62.581	gi|15225603|ref|NP_181527.1|	96.3	1e-19	transferase family protein [Arabidopsis thaliana] >gi|13937226|gb|AAK50105.1|AF372968_1 At2g39980/T28M21.14 [Arabidopsis thaliana] >gi|21700883|gb|AAM70565.1| At2g39980/T28M21.14 [Arabidopsis thaliana] >gi|91805487|gb|ABE65472.1| transferase family protein [Arabidopsis thaliana]	sp|Q9FF86|DCR_ARATH	52	1e-06	BAHD acyltransferase DCR OS=Arabidopsis thaliana GN=DCR PE=2 SV=1	--	--	--	--	--	--	--	--	--	--	-	-	-
fd_631	GAAC01000512	275	41	17.5265	gi|297601654|ref|NP_001051206.2|	53.9	5e-07	Os03g0737900 [Oryza sativa Japonica Group] >gi|255674879|dbj|BAF13120.2| Os03g0737900 [Oryza sativa Japonica Group]	--	--	--	--	--	--	--	--	--	--	--	--	--	--	-	-	-
fd_632	GAAC01000513	374	80	25.1456	gi|9294423|dbj|BAB02543.1|	241	2e-63	mitotic checkpoint protein [Arabidopsis thaliana]	sp|Q54DM1|BUB3_DICDI	179	6e-45	Mitotic checkpoint protein bub3 OS=Dictyostelium discoideum GN=bub3 PE=3 SV=1	--	--	--	--	--	K02180	5e-68	252	vvi:100248006	cell cycle arrest protein BUB3	-	-	-
fd_633	GAAC01000514	273	10	4.3061	gi|47232551|dbj|BAD18986.1|	70.5	4e-20	GAG-POL precursor [Vitis vinifera] >gi|109659801|dbj|BAE96746.1| GAG-POL precursor [Vitis vinifera] >gi|109659805|dbj|BAE96749.1| GAG-POL precursor [Vitis vinifera] >gi|221271542|dbj|BAH15077.1| GAG-POL precursor [Vitis vinifera]	--	--	--	--	--	--	--	--	--	--	--	--	--	--	-	-	-
fd_634	GAAC01000515	358	61	20.0304	gi|116248667|gb|ABJ90468.1|	241	2e-63	beta-ketoacyl-ACP synthase I [Jatropha curcas]	sp|P52410|KASC1_ARATH	239	5e-63	3-oxoacyl-[acyl-carrier-protein] synthase I, chloroplastic OS=Arabidopsis thaliana GN=KAS1 PE=2 SV=2	CT770	155	2e-38	COG0304	3-oxoacyl-(acyl-carrier-protein) synthase	K09458	1e-64	241	rcu:RCOM_0633300	3-oxoacyl-[acyl-carrier-protein] synthase II [EC:2.3.1.179]	-	-	-
fd_635	GAAC01000516	218	9	4.8532	gi|117940083|sp|Q0WUU6.1|PLT4_ARATH	87.4	9e-23	RecName: Full=Probable polyol transporter 4	sp|Q0WUU6|PLT4_ARATH	87.4	5e-23	Probable polyol transporter 4 OS=Arabidopsis thaliana GN=PLT4 PE=2 SV=1	Cgl0181	43.1	6e-06	COG0477	Permeases of the major facilitator superfamily	--	--	--	--	--	-	-	-
fd_636	GAAC01000517	230	13	6.6444	gi|79587734|ref|NP_849630.3|	79.7	9e-15	protein prenyltransferase [Arabidopsis thaliana] >gi|3540189|gb|AAC34339.1| Hypothetical protein [Arabidopsis thaliana]	--	--	--	--	--	--	--	--	--	--	--	--	--	--	-	-	-
fd_637	--	167	14	9.855	gi|224125310|ref|XP_002319554.1|	97.1	6e-20	Ca2+ antiporter/cation exchanger [Populus trichocarpa] >gi|222857930|gb|EEE95477.1| Ca2+ antiporter/cation exchanger [Populus trichocarpa]	--	--	--	--	--	--	--	--	--	--	--	--	--	--	-	-	-
fd_638	GAAC01000518	317	118	43.7589	gi|168034319|ref|XP_001769660.1|	97.1	8e-35	Rab5/RabF-family small GTPase [Physcomitrella patens subsp. patens] >gi|162679009|gb|EDQ65461.1| Rab5/RabF-family small GTPase [Physcomitrella patens subsp. patens]	sp|P31583|RHN1_NICPL	97.1	6e-32	Ras-related protein RHN1 OS=Nicotiana plumbaginifolia GN=RHN1 PE=2 SV=1	YER031c	64.3	2e-16	COG1100	GTPase SAR1 and related small G proteins	K07976	9e-33	96.7	ath:AT5G45130	Rab family, other	-	-	-
fd_639	GAAC01000519	603	215	41.9145	gi|30698937|ref|NP_177485.2|	339	2e-92	sec34-like family protein [Arabidopsis thaliana] >gi|186495067|ref|NP_001117595.1| sec34-like family protein [Arabidopsis thaliana]	sp|Q96JB2|COG3_HUMAN	136	1e-31	Conserved oligomeric Golgi complex subunit 3 OS=Homo sapiens GN=COG3 PE=1 SV=3	--	--	--	--	--	--	--	--	--	--	-	-	-
fd_640	--	188	185	115.68	gi|297810257|ref|XP_002873012.1|	111	3e-24	LMBR1 integral membrane family protein [Arabidopsis lyrata subsp. lyrata] >gi|297318849|gb|EFH49271.1| LMBR1 integral membrane family protein [Arabidopsis lyrata subsp. lyrata]	sp|Q9M028|LMBD2_ARATH	111	2e-24	LIMR family protein At5g01460 OS=Arabidopsis thaliana GN=At5g01460 PE=2 SV=1	--	--	--	--	--	--	--	--	--	--	-	-	-
fd_641	GAAC01000520	553	84	17.8565	gi|33519154|gb|AAQ20892.1|	303	6e-82	10-hydroxygeraniol oxidoreductase [Camptotheca acuminata]	sp|Q9ZRF1|MTDH_FRAAN	298	2e-80	Probable mannitol dehydrogenase OS=Fragaria ananassa GN=CAD PE=2 SV=1	RSp1124	176	3e-44	COG1064	Zn-dependent alcohol dehydrogenases	K00083	4e-67	250	ath:AT4G37970	cinnamyl-alcohol dehydrogenase [EC:1.1.1.195]	-	-	-
fd_642	GAAC01000521	263	15	6.7047	gi|115480940|ref|NP_001064063.1|	84.7	3e-16	Os10g0119300 [Oryza sativa Japonica Group] >gi|113638672|dbj|BAF25977.1| Os10g0119300 [Oryza sativa Japonica Group]	sp|Q7G6K7|FH3_ORYSJ	84.7	2e-16	Formin-like protein 3 OS=Oryza sativa subsp. japonica GN=FH3 PE=2 SV=2	--	--	--	--	--	--	--	--	--	--	-	-	-
fd_643	--	170	215	148.673	gi|49861127|gb|AAT68776.1|	123	6e-28	catalase [Camellia sinensis]	sp|P49317|CATA3_NICPL	123	3e-28	Catalase isozyme 3 OS=Nicotiana plumbaginifolia GN=CAT3 PE=2 SV=1	BS_katX	58.5	3e-09	COG0753	Catalase	K03781	3e-27	116	vvi:100244516	catalase [EC:1.11.1.6]	-	-	-
fd_644	--	160	4	2.9389	--	--	--	--	--	--	--	--	--	--	--	--	--	--	--	--	--	--	-	-	-
fd_645	GAAC01000522	553	205	43.5785	gi|15218445|ref|NP_175036.1|	243	7e-64	emb1075 (embryo defective 1075); carboxy-lyase/ catalytic/ pyridoxal phosphate binding [Arabidopsis thaliana] >gi|7523682|gb|AAF63121.1|AC009526_6 Putative histidine decarboxylase [Arabidopsis thaliana] >gi|15011302|gb|AAK77493.1|AF389349_1 serine decarboxylase [Arabidopsis thaliana] >gi|17907848|dbj|BAB79456.1| histidine decarboxylase [Arabidopsis thaliana] >gi|17907853|dbj|BAB79457.1| histidine…	sp|P54772|DCHS_SOLLC	102	2e-21	Histidine decarboxylase OS=Solanum lycopersicum GN=HDC PE=2 SV=1	mlr6209	71.2	1e-12	COG0076	Glutamate decarboxylase and related PLP-dependent proteins	K01590	5e-73	270	vvi:100258141	histidine decarboxylase [EC:4.1.1.22]	-	-	-
fd_646	--	152	37	28.6155	gi|283049400|gb|ADB07168.1|	105	1e-22	DEAD-box RNA helicase-like protein [Prunus persica] >gi|283049402|gb|ADB07169.1| DEAD-box RNA helicase-like protein [Prunus persica]	sp|Q40471|IF4A9_TOBAC	105	7e-23	Eukaryotic initiation factor 4A-9 OS=Nicotiana tabacum PE=2 SV=1	SPAC1006.07	90.9	5e-19	COG0513	Superfamily II DNA and RNA helicases	K03257	5e-24	105	vvi:100249159	translation initiation factor eIF-4A	-	-	-
fd_647	--	152	1	0.7734	gi|297809167|ref|XP_002872467.1|	68.2	3e-11	ATSLY1 [Arabidopsis lyrata subsp. lyrata] >gi|297318304|gb|EFH48726.1| ATSLY1 [Arabidopsis lyrata subsp. lyrata]	sp|Q9SL48|SLY1_ARATH	67.8	2e-11	SEC1 family transport protein SLY1 OS=Arabidopsis thaliana GN=SLY1 PE=1 SV=1	--	--	--	--	--	--	--	--	--	--	-	-	-
fd_648	GAAC01000523	569	38	7.8508	gi|15231700|ref|NP_190855.1|	75.1	5e-13	calmodulin-binding family protein [Arabidopsis thaliana] >gi|24111367|gb|AAN46807.1| At3g52870/F8J2_40 [Arabidopsis thaliana]	--	--	--	--	--	--	--	--	--	--	--	--	--	--	-	-	-
fd_649	GAAC01000524	1093	176	18.9293	gi|17979018|gb|AAL49957.1|	271	8e-72	GTP cyclohydrolase I [Solanum lycopersicum]	sp|Q8YLL1|GCH11_ANASP	118	6e-26	GTP cyclohydrolase 1 1 OS=Anabaena sp. (strain PCC 7120) GN=folE1 PE=3 SV=1	alr5287	118	2e-26	COG0302	GTP cyclohydrolase I	K01495	1e-81	300	rcu:RCOM_1416900	GTP cyclohydrolase I [EC:3.5.4.16]	-	-	-
fd_650	GAAC01000525	257	237	108.407	gi|78191454|gb|ABB29948.1|	140	3e-33	vesicle transport v-SNARE 11-like [Solanum tuberosum]	sp|Q9LVP9|VTI13_ARATH	129	7e-30	Vesicle transport v-SNARE 13 OS=Arabidopsis thaliana GN=VTI13 PE=2 SV=1	--	--	--	--	--	K08493	3e-35	142	rcu:RCOM_0537940	vesicle transport through interaction with t-SNAREs 1	-	-	-
fd_651	--	157	3	2.2463	gi|81250785|gb|ABB69782.1|	67.8	4e-11	beta-glucan-binding protein 2 [Medicago truncatula]	--	--	--	--	--	--	--	--	--	--	--	--	--	--	-	-	-
fd_652	GAAC01000526	353	50	16.6509	gi|187476491|gb|ACD12705.1|	216	5e-56	AOC [Petunia x hybrida]	sp|Q9LS01|AOC3_ARATH	186	5e-47	Allene oxide cyclase 3, chloroplastic OS=Arabidopsis thaliana GN=AOC3 PE=2 SV=1	--	--	--	--	--	K10525	1e-51	197	osa:4333201	allene oxide cyclase [EC:5.3.99.6]	-	-	-
fd_653	--	175	158	106.136	gi|164430467|gb|ABY55551.1|	112	1e-24	calcium-dependent protein kinase [Swainsona canescens]	sp|Q9SZM3|CDPKQ_ARATH	110	3e-24	Calcium-dependent protein kinase 26 OS=Arabidopsis thaliana GN=CPK26 PE=2 SV=1	--	--	--	--	--	K13412	9e-26	111	pop:POPTR_803966	calcium-dependent protein kinase [EC:2.7.11.1]	-	-	-
fd_654	--	184	6	3.8333	--	--	--	--	--	--	--	--	--	--	--	--	--	--	--	--	--	--	-	-	-
fd_655	GAAC01000527	1183	249	24.7433	gi|30695804|ref|NP_851024.1|	528	1e-149	WD-40 repeat family protein [Arabidopsis thaliana] >gi|30725544|gb|AAP37794.1| At3g63460 [Arabidopsis thaliana]	sp|Q7SYD5|SC31A_DANRE	218	9e-56	Protein transport protein Sec31A OS=Danio rerio GN=sec31a PE=2 SV=1	--	--	--	--	--	K11801	5e-06	49.3	cme:CMR161C	WD repeat-containing protein 23	-	-	-
fd_656	--	170	43	29.7346	gi|121501708|gb|ABM55249.1|	115	2e-25	casein kinase [Beta vulgaris]	sp|P42158|KC1D_ARATH	112	7e-25	Casein kinase I isoform delta-like OS=Arabidopsis thaliana GN=At4g26100 PE=2 SV=2	--	--	--	--	--	K00924	1e-25	110	ath:AT4G28540	[EC:2.7.1.-]	-	-	-
fd_657	--	185	188	119.462	gi|55585878|gb|AAV54051.1|	119	1e-26	3-hydroxy-3-methylglutaryl coenzyme A reductase [Eucommia ulmoides]	sp|Q01559|HMDH_NICSY	113	4e-25	3-hydroxy-3-methylglutaryl-coenzyme A reductase OS=Nicotiana sylvestris GN=HMGR PE=2 SV=1	YML075c	94	6e-20	COG1257	Hydroxymethylglutaryl-CoA reductase	K00021	6e-25	108	osa:4346017	3-hydroxy-3-methylglutaryl-CoA reductase [EC:1.1.1.34]	-	-	-
fd_658	GAAC01000528	392	35	10.496	gi|8778783|gb|AAF79791.1|AC020646_14	124	3e-28	T32E20.28 [Arabidopsis thaliana]	--	--	--	--	--	--	--	--	--	--	--	--	--	--	-	-	-
fd_659	--	184	6	3.8333	gi|225466215|ref|XP_002266678.1|	118	2e-26	PREDICTED: similar to auxin response factor 8 [Vitis vinifera]	sp|Q2QM84|ARFY_ORYSJ	116	4e-26	Auxin response factor 25 OS=Oryza sativa subsp. japonica GN=ARF25 PE=2 SV=1	--	--	--	--	--	--	--	--	--	--	-	-	-
fd_660	GAAC01000529	1163	300	30.3239	gi|18394949|ref|NP_564133.1|	560	1e-158	transporter-related [Arabidopsis thaliana] >gi|89000949|gb|ABD59064.1| At1g21070 [Arabidopsis thaliana]	sp|Q8RXL8|Y1689_ARATH	234	7e-61	Uncharacterized membrane protein At1g06890 OS=Arabidopsis thaliana GN=At1g06890 PE=1 SV=1	--	--	--	--	--	--	--	--	--	--	-	-	-
fd_661	GAAC01000530	642	40	7.3243	gi|115488588|ref|NP_001066781.1|	305	4e-82	Os12g0485400 [Oryza sativa Japonica Group] >gi|122248588|sp|Q2QQS5.1|CCT14_ORYSJ RecName: Full=Cyclin-T1-4; Short=CycT1;4 >gi|113649288|dbj|BAF29800.1| Os12g0485400 [Oryza sativa Japonica Group]	sp|Q2QQS5|CCT14_ORYSJ	305	2e-82	Cyclin-T1-4 OS=Oryza sativa subsp. japonica GN=CYCT1-1 PE=2 SV=1	SPBC32F12.06	97.4	2e-20	COG5333	Cdk activating kinase (CAK)/RNA polymerase II transcription initiation/nucleotide excision repair factor TFIIH/TFIIK, cyclin H subunit	K06634	4e-06	48.1	ppp:PHYPADRAFT_147634	cyclin H	-	-	-
fd_662	GAAC01000531	438	44	11.8092	gi|6522541|emb|CAB61984.1|	95.5	3e-38	receptor-kinase like protein [Arabidopsis thaliana] >gi|224589594|gb|ACN59330.1| leucine-rich repeat receptor-like protein kinase [Arabidopsis thaliana]	sp|C0LGP4|Y3475_ARATH	95.9	1e-34	Probable LRR receptor-like serine/threonine-protein kinase At3g47570 OS=Arabidopsis thaliana GN=At3g47570 PE=1 SV=1	L138452_1	47	3e-09	COG0515	Serine/threonine protein kinase	K13428	6e-32	92.4	ath:AT5G20480	LRR receptor-like serine/threonine-protein kinase EFR [EC:2.7.11.1]	-	-	-
fd_663	GAAC01000532	437	33	8.8772	gi|115440493|ref|NP_001044526.1|	52.4	2e-06	Os01g0799000 [Oryza sativa Japonica Group] >gi|20804725|dbj|BAB92411.1| NBS-LRR resistance protein RGH1-like [Oryza sativa Japonica Group] >gi|113534057|dbj|BAF06440.1| Os01g0799000 [Oryza sativa Japonica Group]	--	--	--	--	--	--	--	--	--	--	--	--	--	--	-	-	-
fd_664	GAAC01000533	891	129	17.0198	gi|215820410|gb|ACJ70676.1|	438	1e-122	EIN3-like protein EIL3 [Actinidia deliciosa]	sp|O23116|EIL3_ARATH	335	3e-91	ETHYLENE INSENSITIVE 3-like 3 protein OS=Arabidopsis thaliana GN=EIL3 PE=1 SV=1	--	--	--	--	--	--	--	--	--	--	-	-	-
fd_665	--	1085	95	10.2929	gi|297810771|ref|XP_002873269.1|	194	1e-48	ubiquitin-specific protease 12 [Arabidopsis lyrata subsp. lyrata] >gi|297319106|gb|EFH49528.1| ubiquitin-specific protease 12 [Arabidopsis lyrata subsp. lyrata]	sp|Q9FPT1|UBP12_ARATH	194	1e-48	Ubiquitin carboxyl-terminal hydrolase 12 OS=Arabidopsis thaliana GN=UBP12 PE=2 SV=2	YMR304w	61.6	2e-09	COG5077	Ubiquitin carboxyl-terminal hydrolase	K11838	8e-50	194	rcu:RCOM_0423090	ubiquitin carboxyl-terminal hydrolase 7 [EC:3.1.2.15]	-	-	-
fd_666	--	193	18	10.9637	--	--	--	--	--	--	--	--	--	--	--	--	--	--	--	--	--	--	-	-	-
fd_667	GAAC01000534	671	125	21.8993	gi|18407911|ref|NP_566873.1|	246	1e-64	2-phosphoglycerate kinase-related [Arabidopsis thaliana]	sp|Q8T1P1|Y3453_DICDI	112	2e-24	Uncharacterized protein DDB_G0273453/DDB_G0273565 OS=Dictyostelium discoideum GN=DDB_G0273453 PE=4 SV=2	MK0868	63.5	3e-10	COG2074	2-phosphoglycerate kinase	--	--	--	--	--	-	-	-
fd_668	--	191	122	75.0878	gi|115471021|ref|NP_001059109.1|	119	8e-27	Os07g0194000 [Oryza sativa Japonica Group] >gi|50509098|dbj|BAD30158.1| synaptobrevin-like protein [Oryza sativa Japonica Group] >gi|60543737|emb|CAD70274.1| synaptobrevin 1 [Oryza sativa (japonica cultivar-group)] >gi|113610645|dbj|BAF21023.1| Os07g0194000 [Oryza sativa Japonica Group]	sp|P47192|VA722_ARATH	115	6e-26	Vesicle-associated membrane protein 722 OS=Arabidopsis thaliana GN=VAMP722 PE=2 SV=2	--	--	--	--	--	K08511	3e-28	119	osa:4342638	vesicle-associated membrane protein 72	-	-	-
fd_669	GAAC01000535	312	44	16.5783	gi|225438229|ref|XP_002264391.1|	182	8e-46	PREDICTED: similar to GCN5-related N-acetyltransferase (GNAT) family protein / amino acid kinase family protein [Vitis vinifera]	sp|C3K3V3|ARGA_PSEFS	84.7	2e-16	Amino-acid acetyltransferase OS=Pseudomonas fluorescens (strain SBW25) GN=argA PE=3 SV=1	RSc1250_1	79	2e-15	COG0548	Acetylglutamate kinase	K00619	3e-47	182	vvi:100259394	amino-acid N-acetyltransferase [EC:2.3.1.1]	-	-	-
fd_670	GAAC01000536	1475	359	28.6118	gi|15228982|ref|NP_191223.1|	694	0	exocyst complex subunit Sec15-like family protein [Arabidopsis thaliana] >gi|24418676|sp|Q9LXX6.1|EXOC6_ARATH RecName: Full=Probable exocyst complex component 6; AltName: Full=Exocyst complex component Sec15	sp|Q9LXX6|EXOC6_ARATH	694	0	Probable exocyst complex component 6 OS=Arabidopsis thaliana GN=At3g56640 PE=2 SV=1	--	--	--	--	--	--	--	--	--	--	-	-	-
fd_671	GAAC01000537	419	18	5.0501	gi|37936234|emb|CAD29576.1|	229	1e-59	sorting nexin 1 [Brassica oleracea]	--	--	--	--	--	--	--	--	--	--	--	--	--	--	-	-	-
fd_672	GAAC01000538	219	25	13.4196	gi|140053518|gb|ABE79573.2|	89.7	9e-18	Bromodomain [Medicago truncatula]	--	--	--	--	--	--	--	--	--	--	--	--	--	--	-	-	-
fd_673	GAAC01000539	249	18	8.498	gi|224081114|ref|XP_002306299.1|	72.4	1e-12	white-brown-complex ABC transporter family [Populus trichocarpa] >gi|222855748|gb|EEE93295.1| white-brown-complex ABC transporter family [Populus trichocarpa]	--	--	--	--	--	--	--	--	--	--	--	--	--	--	-	-	-
fd_674	GAAC01000540	429	61	16.7154	gi|268053527|gb|ACY92425.1|	274	3e-73	exportin-1 [Solanum lycopersicum]	sp|Q80U96|XPO1_RAT	160	2e-39	Exportin-1 OS=Rattus norvegicus GN=Xpo1 PE=2 SV=1	SPAC1805.17	154	4e-38	COG5101	Importin beta-related nuclear transport receptor	--	--	--	--	--	-	-	-
fd_675	GAAC01000541	241	32	15.609	--	--	--	--	--	--	--	--	--	--	--	--	--	--	--	--	--	--	-	-	-
fd_676	GAAC01000542	374	27	8.4866	gi|79512687|ref|NP_196834.3|	245	1e-64	SFC (SCARFACE); ARF GTPase activator/ phosphoinositide binding [Arabidopsis thaliana] >gi|75321812|sp|Q5W7F2.1|AGD3_ARATH RecName: Full=ADP-ribosylation factor GTPase-activating protein AGD3; Short=ARF GAP AGD3; AltName: Full=Protein ARF-GAP DOMAIN 3; Short=AtAGD3; AltName: Full=Protein VASCULAR NETWORK 3; AltName: Full=Protein SCARFACE >gi|55583334|dbj|BAD69588.1| ARF-GAP [Arabidopsis thaliana]	sp|Q5W7F2|AGD3_ARATH	245	5e-65	ADP-ribosylation factor GTPase-activating protein AGD3 OS=Arabidopsis thaliana GN=AGD3 PE=1 SV=1	--	--	--	--	--	K12489	6e-66	245	pop:POPTR_554695	Arf-GAP with coiled-coil, ANK repeat and PH domain-containing protein	-	-	-
fd_677	GAAC01000543	522	68	15.3138	gi|1346121|sp|P49363.1|GCST_FLAPR	180	9e-45	RecName: Full=Aminomethyltransferase, mitochondrial; AltName: Full=Glycine cleavage system T protein; Short=GCVT; Flags: Precursor >gi|438005|emb|CAA81077.1| T protein [Flaveria pringlei]	sp|P49363|GCST_FLAPR	180	5e-45	Aminomethyltransferase, mitochondrial OS=Flaveria pringlei GN=GDCST PE=2 SV=1	CC3355	76.3	3e-14	COG0404	Glycine cleavage system T protein (aminomethyltransferase)	K00605	7e-46	179	vvi:100250401	aminomethyltransferase [EC:2.1.2.10]	-	-	-
fd_678	GAAC01000544	691	623	105.987	gi|225446662|ref|XP_002281788.1|	332	3e-90	PREDICTED: similar to shaggy-related protein kinase delta / ASK-delta / ASK-dzeta (ASK4) [Vitis vinifera]	sp|Q39011|KSG7_ARATH	331	2e-90	Shaggy-related protein kinase eta OS=Arabidopsis thaliana GN=ASK7 PE=1 SV=2	SPAC1687.15	165	6e-41	COG0515	Serine/threonine protein kinase	K00924	2e-91	331	ath:AT4G18710	[EC:2.7.1.-]	-	-	-
fd_679	GAAC01000545	524	72	16.1527	gi|186496585|ref|NP_178118.2|	203	9e-52	FRS8 (FAR1-related sequence 8); zinc ion binding [Arabidopsis thaliana]	sp|Q9S793|FRS8_ARATH	203	5e-52	Protein FAR1-RELATED SEQUENCE 8 OS=Arabidopsis thaliana GN=FRS8 PE=2 SV=1	--	--	--	--	--	--	--	--	--	--	-	-	-
fd_680	GAAC01000546	280	15	6.2976	gi|124360934|gb|ABN08906.1|	59.7	1e-08	Ankyrin [Medicago truncatula]	--	--	--	--	--	--	--	--	--	--	--	--	--	--	-	-	-
fd_681	GAAC01000547	251	76	35.5945	gi|56784185|dbj|BAD81570.1|	160	4e-39	clathrin-associated protein unc-101-like [Oryza sativa Japonica Group] >gi|56785137|dbj|BAD81792.1| clathrin-associated protein unc-101-like [Oryza sativa Japonica Group]	sp|Q9BXS5|AP1M1_HUMAN	117	3e-26	AP-1 complex subunit mu-1 OS=Homo sapiens GN=AP1M1 PE=1 SV=3	--	--	--	--	--	K12393	3e-41	162	pop:POPTR_832867	AP-1 complex subunit mu	-	-	-
fd_682	GAAC01000548	220	18	9.6182	gi|8778491|gb|AAF79499.1|AC002328_7	78.6	2e-14	F20N2.20 [Arabidopsis thaliana]	sp|P86182|CCD22_RAT	59.7	5e-09	Coiled-coil domain-containing protein 22 OS=Rattus norvegicus GN=Ccdc22 PE=1 SV=2	--	--	--	--	--	--	--	--	--	--	-	-	-
fd_683	GAAC01000549	230	93	47.5333	gi|295841621|dbj|BAJ07191.1|	152	9e-37	SRS3 protein [Oryza sativa Japonica Group]	sp|Q6S004|KIF6_DICDI	119	6e-27	Kinesin-related protein 6 OS=Dictyostelium discoideum GN=kif6 PE=2 SV=1	ECU11g0470	96.7	9e-21	COG5059	Kinesin-like protein	K10393	3e-38	152	zma:100302578	kinesin family member 2/24	-	-	-
fd_684	GAAC01000550	2541	845	39.0927	gi|225433442|ref|XP_002285674.1|	1410	0	PREDICTED: similar to catalytic [Vitis vinifera]	sp|Q69ZF3|GBA2_MOUSE	365	1e-99	Non-lysosomal glucosylceramidase OS=Mus musculus GN=Gba2 PE=2 SV=2	sll1775	256	1e-67	COG4354	Predicted bile acid beta-glucosidase	--	--	--	--	--	-	-	-
fd_685	GAAC01000551	220	16	8.5495	gi|186510163|ref|NP_001118648.1|	88.6	2e-17	UPL6 (UBIQUITIN PROTEIN LIGASE 6); ubiquitin-protein ligase [Arabidopsis thaliana]	sp|Q8RWB8|UPL6_ARATH	88.6	1e-17	E3 ubiquitin-protein ligase UPL6 OS=Arabidopsis thaliana GN=UPL6 PE=2 SV=1	--	--	--	--	--	K10589	9e-20	91.7	pop:POPTR_882424	ubiquitin-protein ligase E3 C [EC:6.3.2.19]	-	-	-
fd_686	GAAC01000552	277	48	20.3706	gi|683502|emb|CAA57528.1|	187	4e-47	protein phosphatase 2A 65 kDa regulatory subunit [Arabidopsis thaliana]	sp|Q38950|2AAB_ARATH	187	2e-47	Serine/threonine-protein phosphatase 2A 65 kDa regulatory subunit A beta isoform OS=Arabidopsis thaliana GN=PP2AA2 PE=1 SV=2	--	--	--	--	--	K03456	2e-48	187	ath:AT3G25800	protein phosphatase 2 (formerly 2A), regulatory subunit A	-	-	-
fd_687	GAAC01000553	632	77	14.3224	gi|289540936|gb|ADD09607.1|	130	1e-29	salt tolerance-like protein [Trifolium repens]	sp|Q9LQZ7|STHX_ARATH	129	1e-29	Probable salt tolerance-like protein At1g75540 OS=Arabidopsis thaliana GN=At1g75540 PE=1 SV=1	--	--	--	--	--	K12135	3e-10	62	ath:AT5G15840	zinc finger protein CONSTANS	-	-	-
fd_688	GAAC01000554	497	54	12.7726	gi|82621136|gb|ABB86256.1|	166	1e-40	eukaryotic translation initiation factor 2 beta subunit-like [Solanum tuberosum]	sp|O24473|IF2B_WHEAT	155	9e-38	Eukaryotic translation initiation factor 2 subunit beta OS=Triticum aestivum PE=1 SV=1	SPAC6B12.17c	107	1e-23	COG1601	Translation initiation factor 2, beta subunit (eIF-2beta)/eIF-5 N-terminal domain	K03238	5e-40	160	pop:POPTR_834674	translation initiation factor eIF-2 beta subunit	-	-	-
fd_689	GAAC01000555	287	171	70.0418	gi|224086779|ref|XP_002307960.1|	204	3e-52	tubulin, beta chain [Populus trichocarpa] >gi|222853936|gb|EEE91483.1| tubulin, beta chain [Populus trichocarpa]	sp|P93176|TBB_HORVU	204	2e-52	Tubulin beta chain OS=Hordeum vulgare GN=TUBB PE=2 SV=1	ECU03g0820i	174	4e-44	COG5023	Tubulin	K07375	1e-53	204	zma:542418	tubulin beta	-	-	-
fd_690	GAAC01000556	203	151	87.4428	gi|1129145|emb|CAA53078.1|	129	1e-29	3-ketoacyl-CoA thiolase B; acetyl-CoA C-acyltransferase [Mangifera indica]	sp|Q56WD9|THIK2_ARATH	125	8e-29	3-ketoacyl-CoA thiolase 2, peroxisomal OS=Arabidopsis thaliana GN=PED1 PE=1 SV=2	PA2940	50.1	1e-06	COG0183	Acetyl-CoA acetyltransferase	K07513	1e-30	127	vvi:100247651	acetyl-CoA acyltransferase 1 [EC:2.3.1.16]	-	-	-
fd_691	GAAC01000557	658	115	20.5454	--	--	--	--	--	--	--	--	--	--	--	--	--	--	--	--	--	--	-	-	-
fd_692	GAAC01000558	1393	227	19.1566	gi|224131516|ref|XP_002328559.1|	77.8	3e-23	nbs-lrr resistance protein [Populus trichocarpa] >gi|222838274|gb|EEE76639.1| nbs-lrr resistance protein [Populus trichocarpa]	sp|Q39214|RPM1_ARATH	60.5	9e-18	Disease resistance protein RPM1 OS=Arabidopsis thaliana GN=RPM1 PE=1 SV=1	--	--	--	--	--	K13457	8e-19	60.5	ath:AT3G07040	disease resistance protein RPM1	-	-	-
fd_693	GAAC01000559	233	37	18.6676	gi|18086376|gb|AAL57648.1|	153	5e-37	AT4g23460/F16G20_160 [Arabidopsis thaliana]	sp|O35643|AP1B1_MOUSE	132	7e-31	AP-1 complex subunit beta-1 OS=Mus musculus GN=Ap1b1 PE=1 SV=1	SPBC2G2.06c	94.4	5e-20	COG5096	Vesicle coat complex, various subunits	K12392	9e-39	154	vvi:100241708	AP-1 complex subunit beta-1	-	-	-
fd_694	GAAC01000560	301	17	6.6394	gi|225424021|ref|XP_002283636.1|	212	9e-55	PREDICTED: similar to Glutaminyl-tRNA synthetase [Vitis vinifera]	sp|P52780|SYQ_LUPLU	210	2e-54	Glutaminyl-tRNA synthetase OS=Lupinus luteus PE=2 SV=2	SPBC342.02	129	1e-30	COG0008	Glutamyl- and glutaminyl-tRNA synthetases	K01886	4e-56	212	vvi:100245668	glutaminyl-tRNA synthetase [EC:6.1.1.18]	-	-	-
fd_695	GAAC01000561	316	43	15.9965	gi|297597537|ref|NP_001044115.2|	179	9e-45	Os01g0725800 [Oryza sativa Japonica Group] >gi|57899731|dbj|BAD87451.1| Cop1 protein-like [Oryza sativa Japonica Group] >gi|255673643|dbj|BAF06029.2| Os01g0725800 [Oryza sativa Japonica Group]	sp|Q94BM7|SPA4_ARATH	175	7e-44	Protein SPA1-RELATED 4 OS=Arabidopsis thaliana GN=SPA4 PE=1 SV=1	mll2837_3	47.8	5e-06	COG2319	FOG: WD40 repeat	K10143	1e-47	184	pop:POPTR_1113820	E3 ubiquitin-protein ligase RFWD2 [EC:6.3.2.19]	-	-	-
fd_696	GAAC01000562	321	29	10.6203	gi|164605535|dbj|BAF98601.1|	189	6e-48	CM0545.290.nc [Lotus japonicus]	sp|Q84WU2|UBP13_ARATH	177	2e-44	Ubiquitin carboxyl-terminal hydrolase 13 OS=Arabidopsis thaliana GN=UBP13 PE=1 SV=1	SPBC713.02c	50.8	6e-07	COG5077	Ubiquitin carboxyl-terminal hydrolase	K11838	1e-52	201	vvi:100244518	ubiquitin carboxyl-terminal hydrolase 7 [EC:3.1.2.15]	-	-	-
fd_697	GAAC01000563	632	121	22.5067	gi|283135894|gb|ADB11338.1|	181	6e-45	theta class glutathione transferase GSTT2 [Populus trichocarpa]	--	--	--	--	--	--	--	--	--	--	--	--	--	--	-	-	-
fd_698	GAAC01000564	1323	136	12.0843	gi|11066056|gb|AAG28436.1|AF195029_1	486	0	plasma membrane Ca2+-ATPase [Glycine max]	sp|Q37145|ACA1_ARATH	466	0	Calcium-transporting ATPase 1, chloroplastic OS=Arabidopsis thaliana GN=ACA1 PE=1 SV=3	BS_yloB	186	4e-58	COG0474	Cation transport ATPase	K01537	0	461	osa:4331984	Ca2+-transporting ATPase [EC:3.6.3.8]	-	-	-
fd_699	GAAC01000565	578	71	14.4402	gi|42565480|gb|AAS21007.1|	127	3e-29	ribonucleoside-diphosphate reductase R2 [Hyacinthus orientalis]	sp|P49730|RIR2_TOBAC	120	2e-27	Ribonucleoside-diphosphate reductase small chain OS=Nicotiana tabacum PE=2 SV=1	SPBC25D12.04	90.1	2e-18	COG0208	Ribonucleotide reductase, beta subunit	K10808	1e-31	131	vvi:100243004	ribonucleoside-diphosphate reductase subunit M2 [EC:1.17.4.1]	-	-	-
fd_700	GAAC01000566	831	180	25.4633	gi|33391246|gb|AAQ17229.1|	231	1e-59	beta 1,3 glucan synthase [Lolium multiflorum]	sp|Q9SFU6|CALS9_ARATH	227	9e-59	Callose synthase 9 OS=Arabidopsis thaliana GN=CALS9 PE=2 SV=1	--	--	--	--	--	K11000	7e-72	267	vvi:100243409	callose synthase [EC:2.4.1.-]	-	-	-
fd_701	GAAC01000567	1353	768	66.7278	gi|224116630|ref|XP_002317351.1|	793	0	multidrug resistance protein ABC transporter family [Populus trichocarpa] >gi|222860416|gb|EEE97963.1| multidrug resistance protein ABC transporter family [Populus trichocarpa]	sp|Q42093|AB2C_ARATH	760	0	ABC transporter C family member 2 OS=Arabidopsis thaliana GN=ABCC2 PE=1 SV=2	YDR135c	331	2e-90	COG1132	ABC-type multidrug transport system, ATPase and permease components	K05666	7e-81	298	olu:OSTLU_35503	ATP-binding cassette, subfamily C (CFTR/MRP), member 2	-	-	-
fd_702	--	169	4	2.7824	--	--	--	--	--	--	--	--	--	--	--	--	--	--	--	--	--	--	-	-	-
fd_703	GAAC01000568	245	17	8.1569	gi|297719947|ref|NP_001172335.1|	89.4	1e-17	Os01g0362000 [Oryza sativa Japonica Group] >gi|255673224|dbj|BAH91065.1| Os01g0362000 [Oryza sativa Japonica Group]	--	--	--	--	--	--	--	--	--	--	--	--	--	--	-	-	-
fd_704	GAAC01000569	344	134	45.792	gi|225427157|ref|XP_002277547.1|	182	1e-45	PREDICTED: similar to P-glycoprotein [Vitis vinifera]	sp|Q8LPK2|AB2B_ARATH	166	3e-41	ABC transporter B family member 2 OS=Arabidopsis thaliana GN=ABCB2 PE=1 SV=2	SPCC663.03	62	3e-10	COG1132	ABC-type multidrug transport system, ATPase and permease components	K05658	4e-21	96.3	ppp:PHYPADRAFT_59717	ATP-binding cassette, subfamily B (MDR/TAP), member 1	-	-	-
fd_705	--	164	13	9.3184	gi|21928129|gb|AAM78092.1|	90.1	7e-18	AT4g17080/dl4570w [Arabidopsis thaliana] >gi|27764944|gb|AAO23593.1| At4g17080/dl4570w [Arabidopsis thaliana]	--	--	--	--	--	--	--	--	--	--	--	--	--	--	-	-	-
fd_706	--	151	13	10.1207	gi|67515338|gb|AAY68198.1|	88.2	3e-17	RNA polymerase IV second largest subunit [Rhododendron macrophyllum]	--	--	--	--	--	--	--	--	--	K03010	9e-17	81.6	vvi:100256013	DNA-directed RNA polymerase II subunit B [EC:2.7.7.6]	-	-	-
fd_707	--	152	14	10.8275	--	--	--	--	--	--	--	--	--	--	--	--	--	--	--	--	--	--	-	-	-
fd_708	GAAC01000570	295	12	4.7819	gi|18406885|ref|NP_566056.1|	137	5e-32	CPFTSY; 7S RNA binding / GTP binding / nucleoside-triphosphatase/ nucleotide binding [Arabidopsis thaliana] >gi|4583548|emb|CAB40382.1| chloroplast FtsY homolog [Arabidopsis thaliana]	--	--	--	--	--	--	--	--	--	K03110	7e-36	145	vvi:100267692	fused signal recognition particle receptor	-	-	-
fd_709	GAAC01000571	417	122	34.3928	gi|6685428|sp|Q9ZTN2.1|ERD2_PETHY	187	4e-47	RecName: Full=ER lumen protein retaining receptor; AltName: Full=HDEL receptor; AltName: Full=PGP169-12 >gi|4105782|gb|AAD02548.1| PGPS/D6 [Petunia x hybrida]	sp|Q9ZTN2|ERD2_PETHY	187	2e-47	ER lumen protein retaining receptor OS=Petunia hybrida GN=ERD2 PE=2 SV=1	YBL040c	81.6	4e-16	COG5196	ER lumen protein retaining receptor	K10949	2e-47	184	pop:POPTR_549820	ER lumen protein retaining receptor	-	-	-
fd_710	GAAC01000572	308	24	9.1602	gi|11494369|gb|AAG35782.1|AF280060_1	182	1e-45	tonneau 1 [Oryza sativa Japonica Group]	sp|Q66JX5|FR1OP_MOUSE	59.3	7e-09	FGFR1 oncogene partner OS=Mus musculus GN=Fgfr1op PE=1 SV=1	--	--	--	--	--	--	--	--	--	--	-	-	-
fd_711	GAAC01000573	1024	124	14.2352	gi|240255711|ref|NP_192030.4|	444	1e-123	transferase, transferring glycosyl groups [Arabidopsis thaliana]	--	--	--	--	--	--	--	--	--	--	--	--	--	--	-	-	-
fd_712	--	156	33	24.8675	gi|9294638|dbj|BAB02977.1|	67	6e-11	glycolate oxidase [Arabidopsis thaliana]	sp|Q9UJM8|HAOX1_HUMAN	52.8	7e-07	Hydroxyacid oxidase 1 OS=Homo sapiens GN=HAO1 PE=1 SV=1	--	--	--	--	--	K11517	3e-09	56.6	zma:100285987	(S)-2-hydroxy-acid oxidase [EC:1.1.3.15]	-	-	-
fd_713	GAAC01000574	335	24	8.4219	gi|113208238|dbj|BAF03523.1|	216	8e-56	CGS1 mRNA stability 1 [Arabidopsis thaliana]	--	--	--	--	--	--	--	--	--	--	--	--	--	--	-	-	-
fd_714	GAAC01000575	442	55	14.628	--	--	--	--	--	--	--	--	--	--	--	--	--	--	--	--	--	--	-	-	-
fd_715	GAAC01000576	440	92	24.5798	gi|224110590|ref|XP_002315568.1|	280	5e-75	chromatin remodeling complex subunit [Populus trichocarpa] >gi|222864608|gb|EEF01739.1| chromatin remodeling complex subunit [Populus trichocarpa]	sp|Q7G8Y3|ISW2_ORYSJ	247	2e-65	Probable chromatin-remodeling complex ATPase chain OS=Oryza sativa subsp. japonica GN=Os01g0367900 PE=2 SV=2	YBR245c	66.6	1e-11	COG0553	Superfamily II DNA/RNA helicases, SNF2 family	K11654	5e-77	282	vvi:100244281	SWI/SNF-related matrix-associated actin-dependent regulator of chromatin subfamily A member 5 [EC:3.6.1.-]	-	-	-
fd_716	GAAC01000577	849	102	14.1233	gi|15231994|ref|NP_187510.1|	185	5e-46	signal peptidase I family protein [Arabidopsis thaliana] >gi|92856564|gb|ABE77399.1| At3g08980 [Arabidopsis thaliana]	sp|Q6AZD4|IMP2L_DANRE	125	5e-28	Mitochondrial inner membrane protease subunit 2 OS=Danio rerio GN=immp2l PE=2 SV=1	YMR035w	105	1e-22	COG0681	Signal peptidase I	K09648	3e-61	231	rcu:RCOM_0644380	mitochondrial inner membrane protease subunit 2 [EC:3.4.99.-]	-	-	-
fd_717	--	189	157	97.652	gi|47497095|dbj|BAD19146.1|	120	6e-27	ankyrin repeat protein-like [Oryza sativa Japonica Group]	--	--	--	--	--	--	--	--	--	--	--	--	--	--	-	-	-
fd_718	GAAC01000578	695	113	19.1133	gi|30678834|ref|NP_566204.2|	389	1e-107	DegP7 (DegP protease 7); catalytic/ protein binding / serine-type endopeptidase/ serine-type peptidase [Arabidopsis thaliana] >gi|75330785|sp|Q8RY22.1|DEGP7_ARATH RecName: Full=Protease Do-like 7 >gi|19310429|gb|AAL84951.1| AT3g03380/T21P5_20 [Arabidopsis thaliana] >gi|27363448|gb|AAO11643.1| At3g03380/T21P5_20 [Arabidopsis thaliana]	sp|Q8RY22|DEGP7_ARATH	389	1e-107	Protease Do-like 7 OS=Arabidopsis thaliana GN=DEGP7 PE=2 SV=1	SPAC23G3.12c	86.7	3e-17	COG0265	Trypsin-like serine proteases, typically periplasmic, contain C-terminal PDZ domain	--	--	--	--	--	-	-	-
fd_719	GAAC01000579	459	134	34.3191	gi|225459358|ref|XP_002284225.1|	228	2e-59	PREDICTED: similar to F28K19.26 [Vitis vinifera]	sp|Q6MEW4|GPMA_PARUW	117	3e-26	2,3-bisphosphoglycerate-dependent phosphoglycerate mutase OS=Protochlamydia amoebophila (strain UWE25) GN=gpmA PE=3 SV=1	CPn0863	114	9e-26	COG0588	Phosphoglycerate mutase 1	K01834	1e-60	228	rcu:RCOM_1034140	phosphoglycerate mutase [EC:5.4.2.1]	-	-	-
fd_720	--	153	7	5.3784	gi|222424676|dbj|BAH20292.1|	102	1e-21	AT3G15880 [Arabidopsis thaliana]	--	--	--	--	--	--	--	--	--	--	--	--	--	--	-	-	-
fd_721	GAAC01000580	1067	129	14.2124	gi|213493066|dbj|BAG84436.1|	681	0	NADP-dependent isocitrate dehydrogenase [Passiflora edulis]	sp|P50218|IDHC_TOBAC	664	0	Isocitrate dehydrogenase [NADP] OS=Nicotiana tabacum PE=2 SV=1	AGc3429	510	1e-144	COG0538	Isocitrate dehydrogenases	K00031	0	689	rcu:RCOM_0113200	isocitrate dehydrogenase [EC:1.1.1.42]	-	-	-
fd_722	--	157	84	62.896	--	--	--	--	--	--	--	--	--	--	--	--	--	--	--	--	--	--	-	-	-
fd_723	GAAC01000581	1036	99	11.2336	--	--	--	--	--	--	--	--	--	--	--	--	--	--	--	--	--	--	-	-	-
fd_724	GAAC01000582	232	15	7.6006	gi|171906300|gb|ACB56939.1|	119	1e-26	mannitol transporter [Artemisia annua]	sp|Q8VZ80|PLT5_ARATH	105	9e-23	Polyol transporter 5 OS=Arabidopsis thaliana GN=PLT5 PE=1 SV=2	L140856	51.2	4e-07	COG0477	Permeases of the major facilitator superfamily	--	--	--	--	--	-	-	-
fd_725	GAAC01000583	458	34	8.7268	gi|109390024|gb|ABG29731.1|	259	6e-69	RNA export 1 [Nicotiana benthamiana]	sp|Q38942|RAE1L_ARATH	256	3e-68	Rae1-like protein At1g80670 OS=Arabidopsis thaliana GN=At1g80670 PE=2 SV=2	all0438_2	71.2	6e-13	COG2319	FOG: WD40 repeat	K02180	3e-16	80.9	cre:CHLREDRAFT_4738	cell cycle arrest protein BUB3	-	-	-
fd_726	--	1752	302	20.2636	gi|115451521|ref|NP_001049361.1|	70.1	9e-11	Os03g0213300 [Oryza sativa Japonica Group] >gi|108706824|gb|ABF94619.1| expressed protein [Oryza sativa (japonica cultivar-group)] >gi|113547832|dbj|BAF11275.1| Os03g0213300 [Oryza sativa Japonica Group]	--	--	--	--	--	--	--	--	--	--	--	--	--	--	-	-	-
fd_727	GAAC01000584	1301	153	13.8248	gi|8778377|gb|AAF79385.1|AC007887_44	337	3e-91	F15O4.11 [Arabidopsis thaliana]	--	--	--	--	--	--	--	--	--	--	--	--	--	--	-	-	-
fd_728	--	190	8	4.9497	--	--	--	--	--	--	--	--	--	--	--	--	--	--	--	--	--	--	-	-	-
fd_729	GAAC01000585	333	64	22.5933	gi|115462265|ref|NP_001054732.1|	189	1e-47	Os05g0163000 [Oryza sativa Japonica Group] >gi|113578283|dbj|BAF16646.1| Os05g0163000 [Oryza sativa Japonica Group]	sp|Q8DKN4|SYR_THEEB	124	2e-28	Arginyl-tRNA synthetase OS=Thermosynechococcus elongatus (strain BP-1) GN=argS PE=3 SV=1	all3717	121	3e-28	COG0018	Arginyl-tRNA synthetase	K01887	4e-50	192	vvi:100261143	arginyl-tRNA synthetase [EC:6.1.1.19]	-	-	-
fd_730	GAAC01000586	452	118	30.6893	gi|59709749|gb|AAP72282.2|	295	1e-79	calcium-dependent calmodulin-independent protein kinase isoform 2 [Cicer arietinum]	sp|Q6NLQ6|CDPKW_ARATH	284	2e-76	Calcium-dependent protein kinase 32 OS=Arabidopsis thaliana GN=CPK32 PE=1 SV=1	SPAC14C4.03	82	4e-16	COG0515	Serine/threonine protein kinase	K13412	1e-81	298	rcu:RCOM_0750920	calcium-dependent protein kinase [EC:2.7.11.1]	-	-	-
fd_731	GAAC01000587	467	364	91.6279	gi|33943131|gb|AAQ55291.1|	289	7e-78	plasma membrane H+-ATPase [Juglans regia]	sp|Q9LV11|PMA11_ARATH	286	3e-77	ATPase 11, plasma membrane-type OS=Arabidopsis thaliana GN=AHA11 PE=1 SV=1	MA2833	105	4e-23	COG0474	Cation transport ATPase	K01535	3e-78	286	ath:AT5G62670	H+-transporting ATPase [EC:3.6.3.6]	-	-	-
fd_732	GAAC01000588	477	66	16.2655	gi|222423458|dbj|BAH19699.1|	137	6e-32	AT4G20440 [Arabidopsis thaliana]	sp|Q9FLQ7|FH20_ARATH	100	3e-21	Formin-like protein 20 OS=Arabidopsis thaliana GN=FH20 PE=2 SV=2	Rv3876	66.6	2e-11	COG0455	ATPases involved in chromosome partitioning	K11086	4e-59	223	vvi:100257709	small nuclear ribonucleoprotein B and B'	-	-	-
fd_733	GAAC01000589	432	53	14.4223	gi|15230120|ref|NP_189091.1|	115	6e-53	leucine-rich repeat family protein / extensin family protein [Arabidopsis thaliana] >gi|75334999|sp|Q9LHF1.1|LRX4_ARATH RecName: Full=Leucine-rich repeat extensin-like protein 4; Short=LRR/EXTENSIN4; Short=AtLRX4; AltName: Full=Cell wall hydroxyproline-rich glycoprotein; Flags: Precursor >gi|9294099|dbj|BAB01951.1| extensin-like protein [Arabidopsis thaliana]	sp|Q8W3M4|Y4744_ARATH	59.7	2e-13	Uncharacterized protein At4g06744 OS=Arabidopsis thaliana GN=At4g06744 PE=2 SV=1	--	--	--	--	--	--	--	--	--	--	-	-	-
fd_734	--	2070	536	30.4395	gi|11994591|dbj|BAB02646.1|	556	0	Ac transposase-like protein [Arabidopsis thaliana]	sp|O96006|ZBED1_HUMAN	63.9	7e-13	Zinc finger BED domain-containing protein 1 OS=Homo sapiens GN=ZBED1 PE=1 SV=1	--	--	--	--	--	--	--	--	--	--	-	-	-
fd_735	GAAC01000590	217	23	12.4598	gi|102139798|gb|ABF69983.1|	119	1e-26	zinc finger (C3HC4 type RING finger) family protein [Musa acuminata]	--	--	--	--	--	--	--	--	--	--	--	--	--	--	-	-	-
fd_736	GAAC01000591	741	55	8.7254	gi|255544812|ref|XP_002513467.1|	76.3	3e-18	ubiquitin-protein ligase, putative [Ricinus communis] >gi|223547375|gb|EEF48870.1| ubiquitin-protein ligase, putative [Ricinus communis]	--	--	--	--	--	--	--	--	--	--	--	--	--	--	-	-	-
fd_737	GAAC01000592	855	104	14.2992	gi|224080379|ref|XP_002306118.1|	472	1e-132	dihydrofolate reductase-thymidylate synthase [Populus trichocarpa] >gi|222849082|gb|EEE86629.1| dihydrofolate reductase-thymidylate synthase [Populus trichocarpa]	sp|P45350|DRTS_DAUCA	442	1e-123	Bifunctional dihydrofolate reductase-thymidylate synthase OS=Daucus carota PE=2 SV=1	ECU08g0090	94.7	2e-19	COG0207	Thymidylate synthase	K13998	5e-118	420	osa:4350527	dihydrofolate reductase / thymidylate synthase [EC:1.5.1.3 2.1.1.45]	-	-	-
fd_738	GAAC01000593	1480	319	25.338	gi|224101445|ref|XP_002312283.1|	609	1e-173	magnesium transporter [Populus trichocarpa] >gi|222852103|gb|EEE89650.1| magnesium transporter [Populus trichocarpa]	sp|Q5R447|MRS2_PONAB	84	3e-15	Magnesium transporter MRS2 homolog, mitochondrial OS=Pongo abelii GN=MRS2 PE=2 SV=1	--	--	--	--	--	--	--	--	--	--	-	-	-
fd_739	GAAC01000594	313	27	10.1406	--	--	--	--	--	--	--	--	--	--	--	--	--	--	--	--	--	--	-	-	-
fd_740	GAAC01000595	318	343	126.797	gi|45935145|gb|AAS79603.1|	204	3e-52	prephenate dehydratase [Ipomoea trifida]	sp|Q9SGD6|AROD6_ARATH	193	3e-49	Arogenate dehydratase/prephenate dehydratase 6, chloroplastic OS=Arabidopsis thaliana GN=ADT6 PE=1 SV=1	aq_951_2	68.2	4e-12	COG0077	Prephenate dehydratase	K04518	8e-34	138	osa:4332477	prephenate dehydratase [EC:4.2.1.51]	-	-	-
fd_741	GAAC01000596	449	23	6.0218	--	--	--	--	--	--	--	--	--	--	--	--	--	--	--	--	--	--	-	-	-
fd_742	GAAC01000597	381	285	87.9353	gi|301601262|dbj|BAJ13303.1|	194	3e-49	autophagy 8 [Ipomoea nil]	sp|Q8S926|ATG8E_ARATH	186	4e-47	Autophagy-related protein 8e OS=Arabidopsis thaliana GN=ATG8E PE=2 SV=1	--	--	--	--	--	K08341	1e-50	194	vvi:100260865	GABA(A) receptor-associated protein (autophagy-related protein 8)	-	-	-
fd_743	--	697	62	10.4569	gi|145839451|gb|ABP96804.1|	248	5e-65	receptor-like protein kinase [Capsicum annuum]	sp|Q9FID5|Y5393_ARATH	196	1e-49	Probable receptor-like protein kinase At5g39030 OS=Arabidopsis thaliana GN=At5g39030 PE=2 SV=1	BH2504_1	48.1	9e-08	COG0515	Serine/threonine protein kinase	K13418	6e-20	94.4	vvi:100247683	somatic embryogenesis receptor kinase 1 [EC:2.7.10.1 2.7.11.1]	-	-	-
fd_744	GAAC01000598	578	65	13.2199	gi|115435842|ref|NP_001042679.1|	192	2e-48	Os01g0266500 [Oryza sativa Japonica Group] >gi|113532210|dbj|BAF04593.1| Os01g0266500 [Oryza sativa Japonica Group]	sp|Q9KG32|Y283_BACHD	104	3e-22	Uncharacterized isomerase BH0283 OS=Bacillus halodurans GN=BH0283 PE=3 SV=1	all1944	107	2e-23	COG0384	Predicted epimerase, PhzC/PhzF homolog	K06998	1e-63	239	pop:POPTR_833728		-	-	-
fd_745	GAAC01000599	269	23	10.0512	gi|37935812|gb|AAP73043.1|	174	3e-43	26S proteasome subunit RPN2b [Arabidopsis thaliana]	sp|O74762|RPN2_SCHPO	105	9e-23	26S proteasome regulatory subunit rpn2 OS=Schizosaccharomyces pombe GN=rpn2 PE=1 SV=1	SPBC17D11.07c	105	2e-23	COG5116	26S proteasome regulatory complex component	K03032	1e-45	177	vvi:100264792	26S proteasome regulatory subunit N2	-	-	-
fd_746	GAAC01000600	346	97	32.9563	gi|297827869|ref|XP_002881817.1|	211	3e-54	phospholipase D beta 1 [Arabidopsis lyrata subsp. lyrata] >gi|297327656|gb|EFH58076.1| phospholipase D beta 1 [Arabidopsis lyrata subsp. lyrata]	sp|P93733|PLDB1_ARATH	209	5e-54	Phospholipase D beta 1 OS=Arabidopsis thaliana GN=PLDBETA1 PE=2 SV=3	--	--	--	--	--	K01115	1e-55	211	ath:AT2G42010	phospholipase D [EC:3.1.4.4]	-	-	-
fd_747	GAAC01000601	581	42	8.498	gi|47834701|gb|AAT39004.1|	271	5e-72	AML1 [Citrus unshiu]	--	--	--	--	--	--	--	--	--	--	--	--	--	--	-	-	-
fd_748	GAAC01000602	299	8	3.1453	--	--	--	--	--	--	--	--	--	--	--	--	--	--	--	--	--	--	-	-	-
fd_749	GAAC01000603	331	35	12.4303	gi|297810135|ref|XP_002872951.1|	145	1e-34	At4g00460 [Arabidopsis lyrata subsp. lyrata] >gi|297318788|gb|EFH49210.1| At4g00460 [Arabidopsis lyrata subsp. lyrata]	sp|Q9LQ89|ROGF2_ARATH	139	4e-33	Rop guanine nucleotide exchange factor 2 OS=Arabidopsis thaliana GN=ROPGEF2 PE=1 SV=2	--	--	--	--	--	--	--	--	--	--	-	-	-
fd_750	GAAC01000604	392	31	9.2965	gi|227202520|dbj|BAH56733.1|	253	6e-67	AT4G30310 [Arabidopsis thaliana]	sp|Q6DCD1|FGGY_XENLA	135	1e-31	FGGY carbohydrate kinase domain-containing protein OS=Xenopus laevis GN=fggy PE=2 SV=2	YPO3637	127	6e-30	COG1069	Ribulose kinase	K00875	3e-14	73.6	cme:CMF097C	D-ribulokinase [EC:2.7.1.47]	-	-	-
fd_751	--	791	67	9.9573	gi|109631194|gb|ABG35773.1|	350	1e-95	SRR391 [Striga asiatica]	sp|P62598|ARR12_ARATH	301	3e-81	Two-component response regulator ARR12 OS=Arabidopsis thaliana GN=ARR12 PE=2 SV=1	all3660	67.8	2e-11	COG2197	Response regulator containing a CheY-like receiver domain and an HTH DNA-binding domain	K12128	1e-20	97.1	ath:AT2G46790	pseudo-response regulator 9	-	-	-
fd_752	GAAC01000605	1269	297	27.513	gi|297832830|ref|XP_002884297.1|	541	1e-153	GAUT13 [Arabidopsis lyrata subsp. lyrata] >gi|297330137|gb|EFH60556.1| GAUT13 [Arabidopsis lyrata subsp. lyrata]	sp|Q0WV13|GAUTD_ARATH	540	1e-152	Probable galacturonosyltransferase 13 OS=Arabidopsis thaliana GN=GAUT13 PE=2 SV=1	--	--	--	--	--	--	--	--	--	--	-	-	-
fd_753	GAAC01000606	262	43	19.2935	gi|40204910|emb|CAD21437.1|	151	2e-36	chitinase [Alnus glutinosa]	sp|O04138|CHI4_ORYSJ	141	1e-33	Chitinase 4 OS=Oryza sativa subsp. japonica GN=Cht4 PE=2 SV=2	--	--	--	--	--	K01183	8e-35	141	osa:4336263	chitinase [EC:3.2.1.14]	-	-	-
fd_754	GAAC01000607	648	51	9.2521	gi|113205376|gb|AAU93592.2|	354	5e-97	uncharacterized plant-specific domain TIGR01589 family protein [Solanum demissum]	--	--	--	--	--	--	--	--	--	--	--	--	--	--	-	-	-
fd_755	GAAC01000608	309	23	8.7501	gi|79324537|ref|NP_001031499.1|	163	6e-40	kinase [Arabidopsis thaliana] >gi|224589545|gb|ACN59306.1| leucine-rich repeat receptor-like protein kinase [Arabidopsis thaliana]	sp|C0LGI2|Y1677_ARATH	88.6	1e-17	Probable LRR receptor-like serine/threonine-protein kinase At1g67720 OS=Arabidopsis thaliana GN=At1g67720 PE=2 SV=1	--	--	--	--	--	--	--	--	--	--	-	-	-
fd_756	GAAC01000609	474	84	20.8326	gi|297822557|ref|XP_002879161.1|	295	1e-79	VHA-A1 [Arabidopsis lyrata subsp. lyrata] >gi|297325000|gb|EFH55420.1| VHA-A1 [Arabidopsis lyrata subsp. lyrata]	sp|Q54E04|VATM_DICDI	167	3e-41	Vacuolar proton translocating ATPase 100 kDa subunit OS=Dictyostelium discoideum GN=vatM PE=1 SV=2	YMR054w	147	8e-36	COG1269	Archaeal/vacuolar-type H+-ATPase subunit I	K02154	1e-83	304	rcu:RCOM_0624680	V-type H+-transporting ATPase subunit I [EC:3.6.3.14]	-	-	-
fd_757	GAAC01000610	453	175	45.4133	gi|68300884|gb|AAY89374.1|	301	2e-81	beta-amylase 1 [Nicotiana langsdorffii x Nicotiana sanderae]	sp|Q9LIR6|BAM1_ARATH	293	2e-79	Beta-amylase 1, chloroplastic OS=Arabidopsis thaliana GN=BAM1 PE=1 SV=1	--	--	--	--	--	K01177	3e-62	233	ath:AT4G17090	beta-amylase [EC:3.2.1.2]	-	-	-
fd_758	--	184	2	1.2778	--	--	--	--	--	--	--	--	--	--	--	--	--	--	--	--	--	--	-	-	-
fd_759	GAAC01000611	246	8	3.8229	gi|157283517|gb|ABV30785.1|	137	3e-32	kinase-like protein [Prunus cerasus var. caproniana]	sp|P93194|RPK1_IPONI	91.7	1e-18	Receptor-like protein kinase OS=Ipomoea nil GN=INRPK1 PE=2 SV=2	--	--	--	--	--	K13416	5e-15	75.9	ath:AT4G33430	brassinosteroid insensitive 1-associated receptor kinase 1 [EC:2.7.10.1 2.7.11.1]	-	-	-
fd_760	GAAC01000612	830	501	70.9582	gi|18410809|ref|NP_567055.1|	459	1e-128	glycoside hydrolase family 28 protein / polygalacturonase (pectinase) family protein [Arabidopsis thaliana]	sp|Q94AJ5|PGLR5_ARATH	82.4	3e-15	Probable polygalacturonase At1g80170 OS=Arabidopsis thaliana GN=At1g80170 PE=2 SV=1	AGl619	141	2e-33	COG5434	Endopolygalacturonase	K01184	5e-13	71.6	ath:AT3G15720	polygalacturonase [EC:3.2.1.15]	-	-	-
fd_761	GAAC01000613	984	169	20.1899	gi|297843592|ref|XP_002889677.1|	518	1e-146	SIT4 phosphatase-associated family protein [Arabidopsis lyrata subsp. lyrata] >gi|297335519|gb|EFH65936.1| SIT4 phosphatase-associated family protein [Arabidopsis lyrata subsp. lyrata]	sp|Q5F471|SAPS3_CHICK	153	2e-36	Serine/threonine-protein phosphatase 6 regulatory subunit 3 OS=Gallus gallus GN=SAPS3 PE=2 SV=1	--	--	--	--	--	--	--	--	--	--	-	-	-
fd_762	GAAC01000614	640	201	36.9198	gi|32815937|gb|AAP88353.1|	68.2	7e-11	At1g21010 [Arabidopsis thaliana]	--	--	--	--	--	--	--	--	--	--	--	--	--	--	-	-	-
fd_763	GAAC01000615	384	44	13.4699	gi|297840395|ref|XP_002888079.1|	136	8e-32	protein binding protein [Arabidopsis lyrata subsp. lyrata] >gi|297333920|gb|EFH64338.1| protein binding protein [Arabidopsis lyrata subsp. lyrata]	sp|Q55DU4|NOSIP_DICDI	55.8	8e-08	Nitric oxide synthase-interacting protein homolog OS=Dictyostelium discoideum GN=nosip PE=2 SV=1	--	--	--	--	--	K13125	3e-41	163	vvi:100262299	nitric oxide synthase-interacting protein	-	-	-
fd_764	--	157	41	30.6992	gi|17979452|gb|AAL50063.1|	52	2e-06	AT4g27310/M4I22_120 [Arabidopsis thaliana]	--	--	--	--	--	--	--	--	--	--	--	--	--	--	-	-	-
fd_765	GAAC01000616	551	46	9.8141	--	--	--	--	--	--	--	--	--	--	--	--	--	--	--	--	--	--	-	-	-
fd_766	GAAC01000617	748	344	54.063	gi|225468413|ref|XP_002263310.1|	433	1e-121	PREDICTED: similar to phosphoinositide phosphatase family protein, partial [Vitis vinifera]	sp|A1L244|SAC1A_DANRE	169	2e-41	Phosphatidylinositide phosphatase SAC1-A OS=Danio rerio GN=sacm1la PE=2 SV=1	YKL212w	134	1e-31	COG5329	Phosphoinositide polyphosphatase (Sac family)	--	--	--	--	--	-	-	-
fd_767	GAAC01000618	550	66	14.1067	--	--	--	--	--	--	--	--	--	--	--	--	--	--	--	--	--	--	-	-	-
fd_768	GAAC01000619	665	58	10.253	gi|104763664|gb|ABF74605.1|	163	1e-39	chloroplast photosystem II 10 kDa protein [Agave tequilana]	sp|Q40519|PSBR_TOBAC	161	3e-39	Photosystem II 10 kDa polypeptide, chloroplastic OS=Nicotiana tabacum GN=PSBR PE=2 SV=1	--	--	--	--	--	K03541	3e-36	148	ath:AT1G79040	photosystem II 10kDa protein	-	-	-
fd_769	GAAC01000620	352	103	34.3984	gi|302144188|emb|CBI23315.3|	57	6e-08	unnamed protein product [Vitis vinifera]	--	--	--	--	--	--	--	--	--	--	--	--	--	--	-	-	-
fd_770	--	152	50	38.6696	gi|255582971|ref|XP_002532255.1|	66.6	8e-11	sentrin/sumo-specific protease, senp8, putative [Ricinus communis] >gi|223528043|gb|EEF30121.1| sentrin/sumo-specific protease, senp8, putative [Ricinus communis]	--	--	--	--	--	--	--	--	--	--	--	--	--	--	-	-	-
fd_771	GAAC01000621	239	9	4.4268	gi|302142602|emb|CBI19805.3|	84.3	4e-16	unnamed protein product [Vitis vinifera]	--	--	--	--	--	--	--	--	--	--	--	--	--	--	-	-	-
fd_772	GAAC01000622	1057	104	11.5665	gi|9759309|dbj|BAB09815.1|	94.4	4e-29	non-LTR retroelement reverse transcriptase-like [Arabidopsis thaliana]	sp|P0C2F6|RNHX1_ARATH	95.1	9e-29	Putative ribonuclease H protein At1g65750 OS=Arabidopsis thaliana GN=At1g65750 PE=3 SV=1	--	--	--	--	--	--	--	--	--	--	-	-	-
fd_773	GAAC01000623	213	15	8.2786	gi|15225249|ref|NP_180178.1|	75.5	4e-26	AtGLDP2 (Arabidopsis thaliana glycine decarboxylase P-protein 2); ATP binding / glycine dehydrogenase (decarboxylating) >gi|12229797|sp|O80988.1|GCSP1_ARATH RecName: Full=Glycine dehydrogenase [decarboxylating] 1, mitochondrial; AltName: Full=Glycine decarboxylase 1; AltName: Full=Glycine cleavage system P protein 1; Flags: Precursor	sp|O80988|GCSP1_ARATH	75.5	2e-26	Glycine dehydrogenase [decarboxylating] 1, mitochondrial OS=Arabidopsis thaliana GN=GDCSP PE=1 SV=1	slr0293_2	64.3	1e-16	COG1003	Glycine cleavage system protein P (pyridoxal-binding), C-terminal domain	K00281	4e-28	77.4	vvi:100266170	glycine dehydrogenase [EC:1.4.4.2]	-	-	-
fd_774	GAAC01000624	433	62	16.8324	gi|118721470|dbj|BAF38479.1|	278	1e-74	vacuolar H+-ATPase subunit B [Zostera marina]	sp|Q43432|VATB1_GOSHI	277	1e-74	V-type proton ATPase subunit B 1 OS=Gossypium hirsutum PE=2 SV=1	SPAC637.05c	204	4e-53	COG1156	Archaeal/vacuolar-type H+-ATPase subunit B	K02147	2e-75	277	vvi:100243574	V-type H+-transporting ATPase subunit B [EC:3.6.3.14]	-	-	-
fd_775	GAAC01000625	275	36	15.3891	--	--	--	--	--	--	--	--	--	--	--	--	--	--	--	--	--	--	-	-	-
fd_776	GAAC01000626	255	31	14.2911	--	--	--	--	--	--	--	--	--	--	--	--	--	--	--	--	--	--	-	-	-
fd_777	GAAC01000627	369	36	11.4688	gi|209954703|dbj|BAG80542.1|	195	1e-49	glycosyltransferase [Lycium barbarum]	sp|Q9SK82|COGT2_ARATH	162	4e-40	Cytokinin-O-glucosyltransferase 2 OS=Arabidopsis thaliana GN=UGT85A1 PE=1 SV=1	--	--	--	--	--	K13030	3e-26	113	sbi:SORBI_01g001220	cyanohydrin beta-glucosyltransferase [EC:2.4.1.85]	-	-	-
fd_778	GAAC01000628	219	128	68.7083	gi|1297361|gb|AAA98985.1|	137	5e-32	alcohol dehydrogenase 1 [Gossypium hirsutum]	sp|P17648|ADH_FRAAN	135	8e-32	Alcohol dehydrogenase OS=Fragaria ananassa GN=ADH PE=3 SV=2	YPO1502	99.4	1e-21	COG1062	Zn-dependent alcohol dehydrogenases, class III	K00001	4e-31	129	osa:4350053	alcohol dehydrogenase [EC:1.1.1.1]	-	-	-
fd_779	GAAC01000629	204	48	27.6601	gi|225426979|ref|XP_002265557.1|	121	3e-27	PREDICTED: similar to oxysterol-binding family protein [Vitis vinifera]	--	--	--	--	--	--	--	--	--	--	--	--	--	--	-	-	-
fd_780	--	184	2	1.2778	--	--	--	--	--	--	--	--	--	--	--	--	--	--	--	--	--	--	-	-	-
fd_781	--	164	3	2.1504	gi|115436148|ref|NP_001042832.1|	106	7e-23	Os01g0303200 [Oryza sativa Japonica Group] >gi|52077473|dbj|BAD45037.1| transmembrane domain, a coiled coil-4 domain, of eukaryotic origin (91.3 kD) -like protein [Oryza sativa Japonica Group] >gi|113532363|dbj|BAF04746.1| Os01g0303200 [Oryza sativa Japonica Group]	sp|Q3UVG3|F91A1_MOUSE	66.6	4e-11	Protein FAM91A1 OS=Mus musculus GN=Fam91a1 PE=1 SV=1	--	--	--	--	--	--	--	--	--	--	-	-	-
fd_782	GAAC01000630	797	128	18.8797	gi|15232969|ref|NP_191645.1|	427	1e-119	guanine nucleotide exchange family protein [Arabidopsis thaliana] >gi|7329696|emb|CAB82690.1| guanine nucleotide exchange factor-like protein [Arabidopsis thaliana]	sp|Q9Y6D5|BIG2_HUMAN	205	2e-52	Brefeldin A-inhibited guanine nucleotide-exchange protein 2 OS=Homo sapiens GN=ARFGEF2 PE=1 SV=3	SPAC30.01c	196	3e-50	COG5307	SEC7 domain proteins	K13462	4e-60	228	rcu:RCOM_0708240	guanine nucleotide-exchange factor	-	-	-
fd_783	GAAC01000631	573	129	26.4654	gi|225429228|ref|XP_002263457.1|	236	1e-61	PREDICTED: similar to Heat shock 70 kDa protein, mitochondrial [Vitis vinifera]	sp|Q08276|HSP7M_SOLTU	227	3e-59	Heat shock 70 kDa protein, mitochondrial OS=Solanum tuberosum GN=HSP68 PE=2 SV=1	RSc2635	130	1e-30	COG0443	Molecular chaperone	K04043	5e-63	236	vvi:100250929	molecular chaperone DnaK	-	-	-
fd_784	GAAC01000632	1692	361	25.0813	gi|297794533|ref|XP_002865151.1|	252	1e-112	low-level beta-amylase 1 [Arabidopsis lyrata subsp. lyrata] >gi|297310986|gb|EFH41410.1| low-level beta-amylase 1 [Arabidopsis lyrata subsp. lyrata]	sp|Q9FJR0|RENT1_ARATH	248	2e-111	Regulator of nonsense transcripts 1 homolog OS=Arabidopsis thaliana GN=UPF1 PE=1 SV=2	--	--	--	--	--	K12831	7e-06	49.3	cre:CHLREDRAFT_196073	splicing factor 3B subunit 4	-	-	-
fd_785	GAAC01000633	953	232	28.6179	gi|79587734|ref|NP_849630.3|	286	3e-76	protein prenyltransferase [Arabidopsis thaliana] >gi|3540189|gb|AAC34339.1| Hypothetical protein [Arabidopsis thaliana]	sp|A3KPW7|PTAR1_DANRE	92	5e-18	Protein prenyltransferase alpha subunit repeat-containing protein 1 OS=Danio rerio GN=ptar1 PE=2 SV=1	--	--	--	--	--	K05955	8e-06	48.1	vvi:100247502	protein farnesyltransferase/geranylgeranyltransferase type-1 subunit alpha [EC:2.5.1.58 2.5.1.59]	-	-	-
fd_786	GAAC01000634	411	14	4.0043	--	--	--	--	--	--	--	--	--	--	--	--	--	--	--	--	--	--	-	-	-
fd_787	--	910	159	20.5399	gi|7671528|emb|CAB89490.1|	293	2e-78	CRK1 protein [Beta vulgaris subsp. vulgaris] >gi|7688002|emb|CAB89665.1| CRK1 protein [Beta vulgaris subsp. vulgaris]	sp|Q9ZVM9|Y1461_ARATH	273	1e-72	Probable serine/threonine-protein kinase At1g54610 OS=Arabidopsis thaliana GN=At1g54610 PE=1 SV=1	--	--	--	--	--	K08819	9e-62	233	osa:4325730	Cdc2-related kinase, arginine/serine-rich [EC:2.7.11.22]	-	-	-
fd_788	GAAC01000635	209	9	5.0622	gi|297811131|ref|XP_002873449.1|	137	3e-32	leucine-rich repeat family protein [Arabidopsis lyrata subsp. lyrata] >gi|297319286|gb|EFH49708.1| leucine-rich repeat family protein [Arabidopsis lyrata subsp. lyrata]	sp|C0LGT1|Y5129_ARATH	137	2e-32	Probable LRR receptor-like serine/threonine-protein kinase At5g10290 OS=Arabidopsis thaliana GN=At5g10290 PE=1 SV=1	--	--	--	--	--	K13418	3e-26	113	vvi:100247683	somatic embryogenesis receptor kinase 1 [EC:2.7.10.1 2.7.11.1]	-	-	-
fd_789	GAAC01000636	520	177	40.0141	gi|21537290|gb|AAM61631.1|	288	3e-77	aspartyl aminopeptidase-like protein [Arabidopsis thaliana]	sp|Q5RBT2|DNPEP_PONAB	168	2e-41	Aspartyl aminopeptidase OS=Pongo abelii GN=DNPEP PE=2 SV=1	SPAC4F10.02	159	2e-39	COG1362	Aspartyl aminopeptidase	K01267	2e-78	288	ath:AT5G60160	aspartyl aminopeptidase [EC:3.4.11.21]	-	-	-
fd_790	GAAC01000637	1077	124	13.5347	gi|47827092|dbj|BAD21122.1|	267	1e-125	ATP-dependent RNA helicase [Hordeum vulgare subsp. vulgare]	sp|Q0DM51|RH3_ORYSJ	265	1e-124	DEAD-box ATP-dependent RNA helicase 3 OS=Oryza sativa subsp. japonica GN=Os03g0827700 PE=2 SV=2	ML0811	104	3e-50	COG0513	Superfamily II DNA and RNA helicases	K11594	6e-42	88.6	ppp:PHYPADRAFT_1580	ATP-dependent RNA helicase [EC:3.6.4.13]	-	-	-
fd_791	GAAC01000638	625	165	31.0347	gi|297819888|ref|XP_002877827.1|	254	7e-67	acyl-CoA oxidase 4 [Arabidopsis lyrata subsp. lyrata] >gi|297323665|gb|EFH54086.1| acyl-CoA oxidase 4 [Arabidopsis lyrata subsp. lyrata]	sp|Q96329|ACOX4_ARATH	253	7e-67	Acyl-coenzyme A oxidase 4, peroxisomal OS=Arabidopsis thaliana GN=ACX4 PE=1 SV=1	DR0551	121	1e-27	COG1960	Acyl-CoA dehydrogenases	K00232	3e-70	261	rcu:RCOM_0186930	acyl-CoA oxidase [EC:1.3.3.6]	-	-	-
fd_792	GAAC01000639	456	74	19.077	gi|297833216|ref|XP_002884490.1|	253	7e-67	transducin family protein [Arabidopsis lyrata subsp. lyrata] >gi|297330330|gb|EFH60749.1| transducin family protein [Arabidopsis lyrata subsp. lyrata]	sp|Q05B17|WDR48_XENTR	100	5e-21	WD repeat-containing protein 48 OS=Xenopus tropicalis GN=wdr48 PE=2 SV=1	--	--	--	--	--	--	--	--	--	--	-	-	-
fd_793	GAAC01000640	277	13	5.517	gi|225435610|ref|XP_002283298.1|	167	3e-41	PREDICTED: similar to Callose synthase 3 [Vitis vinifera]	sp|Q9LXT9|CALS3_ARATH	165	9e-41	Callose synthase 3 OS=Arabidopsis thaliana GN=CALS3 PE=2 SV=2	--	--	--	--	--	K11000	1e-43	171	rcu:RCOM_0146290	callose synthase [EC:2.4.1.-]	GO:0006074	GO:0035251//UDP-glucosyltransferase activity	GO:0043234//protein complex;GO:0016020//membrane
fd_794	GAAC01000641	327	26	9.3469	gi|62320053|dbj|BAD94207.1|	71.2	3e-12	elongation factor like protein [Arabidopsis thaliana]	sp|Q5R6E0|U5S1_PONAB	57.8	2e-08	116 kDa U5 small nuclear ribonucleoprotein component OS=Pongo abelii GN=EFTUD2 PE=2 SV=1	SPBC215.12	47.4	6e-06	COG0480	Translation elongation factors (GTPases)	K12852	3e-14	73.6	vvi:100253367	116 kDa U5 small nuclear ribonucleoprotein component	GO:0045595//regulation of cell differentiation;GO:0003006//reproductive developmental process	GO:0017111//nucleoside-triphosphatase activity;GO:0008135//translation factor activity, nucleic acid binding;GO:0032561//guanyl ribonucleotide binding	GO:0032991;GO:0030312//external encapsulating structure;GO:0016604//nuclear body;GO:0016020//membrane
fd_795	GAAC01000642	679	169	29.259	gi|297822435|ref|XP_002879100.1|	172	3e-42	dsRNA-binding protein 2 [Arabidopsis lyrata subsp. lyrata] >gi|297324939|gb|EFH55359.1| dsRNA-binding protein 2 [Arabidopsis lyrata subsp. lyrata]	sp|P37370|VRP1_YEAST	52.8	2e-06	Verprolin OS=Saccharomyces cerevisiae GN=VRP1 PE=1 SV=2	--	--	--	--	--	--	--	--	--	--	-	GO:0003723//RNA binding	GO:0044424//intracellular part
fd_796	GAAC01000643	265	15	6.6541	gi|116309302|emb|CAH66391.1|	92.8	1e-18	OSIGBa0134J07.9 [Oryza sativa (indica cultivar-group)]	--	--	--	--	--	--	--	--	--	--	--	--	--	--	GO:0006259//DNA metabolic process	GO:0016209//antioxidant activity;GO:0003676//nucleic acid binding	-
fd_797	GAAC01000644	524	267	59.8995	gi|186493687|ref|NP_683478.2|	277	5e-74	binding / zinc ion binding [Arabidopsis thaliana]	sp|Q8GZ43|YZR3_ARATH	273	6e-73	RanBP2-type zinc finger protein At1g67325 OS=Arabidopsis thaliana GN=At1g67325 PE=1 SV=1	--	--	--	--	--	--	--	--	--	--	-	GO:0046914//transition metal ion binding	GO:0044464//cell part
fd_798	GAAC01000645	503	39	9.1146	gi|115438929|ref|NP_001043744.1|	283	6e-76	Os01g0653800 [Oryza sativa Japonica Group] >gi|55296497|dbj|BAD68693.1| WD-40 repeat family protein-like [Oryza sativa Japonica Group] >gi|113533275|dbj|BAF05658.1| Os01g0653800 [Oryza sativa Japonica Group]	--	--	--	--	--	--	--	--	--	--	--	--	--	--	-	-	GO:0043231//intracellular membrane-bounded organelle
fd_799	GAAC01000646	769	91	13.911	gi|186510768|ref|NP_190388.2|	65.1	9e-10	DNA binding / protein binding / transcription regulator [Arabidopsis thaliana] >gi|186510770|ref|NP_850669.2| DNA binding / protein binding / transcription regulator [Arabidopsis thaliana]	--	--	--	--	--	--	--	--	--	--	--	--	--	--	-	-	-
fd_800	GAAC01000647	619	46	8.736	gi|224122474|ref|XP_002330490.1|	146	2e-58	arginine methyltransferease [Populus trichocarpa] >gi|222872424|gb|EEF09555.1| arginine methyltransferease [Populus trichocarpa]	sp|Q0J2C6|ANM1_ORYSJ	146	2e-56	Probable protein arginine N-methyltransferase 1 OS=Oryza sativa subsp. japonica GN=PRMT1 PE=2 SV=1	YBR034c	114	8e-36	COG0500	SAM-dependent methyltransferases	K11434	3e-63	152	vvi:100266357	protein arginine N-methyltransferase 1 [EC:2.1.1.-]	GO:0008213	GO:0005515//protein binding;GO:0016274//protein-arginine N-methyltransferase activity	GO:0043231//intracellular membrane-bounded organelle
fd_801	GAAC01000648	578	123	25.0161	gi|224092083|ref|XP_002309467.1|	308	2e-83	f-box family protein [Populus trichocarpa] >gi|222855443|gb|EEE92990.1| f-box family protein [Populus trichocarpa]	sp|Q9SMY8|FBL15_ARATH	283	7e-76	F-box/LRR-repeat protein 15 OS=Arabidopsis thaliana GN=FBL15 PE=1 SV=2	--	--	--	--	--	K03875	2e-07	52	ath:AT1G77000	F-box and leucine-rich repeat protein 1 (S-phase kinase-associated protein 2)	-	GO:0005488//binding	-
fd_802	GAAC01000649	498	101	23.8416	gi|297736542|emb|CBI25413.3|	92	3e-18	unnamed protein product [Vitis vinifera]	--	--	--	--	--	--	--	--	--	--	--	--	--	--	-	-	-
fd_803	GAAC01000650	476	33	8.1499	gi|50401195|sp|Q9SWR3.1|MMT1_WOLBI	157	5e-38	RecName: Full=Methionine S-methyltransferase; AltName: Full=AdoMet:Met S-methyltransferase >gi|5733427|gb|AAD49573.1| methionine S-methyltransferase [Wollastonia biflora]	sp|Q9SWR3|MMT1_WOLBI	157	3e-38	Methionine S-methyltransferase OS=Wollastonia biflora GN=MMT1 PE=1 SV=1	--	--	--	--	--	K08247	6e-32	133	ath:AT5G49810	methionine S-methyltransferase [EC:2.1.1.12]	GO:0006790//sulfur metabolic process	GO:0008757//S-adenosylmethionine-dependent methyltransferase activity;GO:0048037//cofactor binding	GO:0044424//intracellular part
fd_804	GAAC01000651	505	54	12.5703	--	--	--	--	--	--	--	--	--	--	--	--	--	--	--	--	--	--	-	-	-
fd_805	GAAC01000652	411	36	10.2968	--	--	--	--	--	--	--	--	--	--	--	--	--	--	--	--	--	--	-	-	-
fd_806	GAAC01000653	214	5	2.7466	--	--	--	--	--	--	--	--	--	--	--	--	--	--	--	--	--	--	-	-	-
fd_807	GAAC01000654	319	33	12.1609	gi|124360986|gb|ABN08958.1|	105	2e-22	Leucine-rich repeat; Leucine-rich repeat, cysteine-containing type [Medicago truncatula]	sp|Q9ZWC8|BRL1_ARATH	53.5	4e-07	Serine/threonine-protein kinase BRI1-like 1 OS=Arabidopsis thaliana GN=BRL1 PE=1 SV=1	--	--	--	--	--	K13428	4e-08	53.1	ath:AT5G20480	LRR receptor-like serine/threonine-protein kinase EFR [EC:2.7.11.1]	-	GO:0016491//oxidoreductase activity;GO:0005488//binding;GO:0016772//transferase activity, transferring phosphorus-containing groups	-
fd_808	GAAC01000655	273	23	9.9039	--	--	--	--	--	--	--	--	--	--	--	--	--	--	--	--	--	--	-	-	-
fd_809	GAAC01000656	243	27	13.0617	--	--	--	--	--	--	--	--	--	--	--	--	--	--	--	--	--	--	-	-	-
fd_810	GAAC01000657	254	12	5.5538	gi|297843332|ref|XP_002889547.1|	115	1e-25	DNA binding protein [Arabidopsis lyrata subsp. lyrata] >gi|297335389|gb|EFH65806.1| DNA binding protein [Arabidopsis lyrata subsp. lyrata]	--	--	--	--	--	--	--	--	--	--	--	--	--	--	GO:0006351//transcription, DNA-dependent	GO:0046914//transition metal ion binding;GO:0003676//nucleic acid binding;GO:0016407//acetyltransferase activity	GO:0043231//intracellular membrane-bounded organelle
fd_811	GAAC01000658	276	46	19.5926	gi|7362764|emb|CAB83134.1|	107	4e-23	small nuclear ribonucleoprotein-like protein [Arabidopsis thaliana] >gi|28466881|gb|AAO44049.1| At2g47640 [Arabidopsis thaliana]	sp|P62317|SMD2_MOUSE	90.9	2e-18	Small nuclear ribonucleoprotein Sm D2 OS=Mus musculus GN=Snrpd2 PE=2 SV=1	SPAC2C4.03c	74.3	5e-14	COG1958	Small nuclear ribonucleoprotein (snRNP) homolog	K11096	1e-26	114	pop:POPTR_709823	small nuclear ribonucleoprotein D2	-	GO:0005488//binding	GO:0030529//ribonucleoprotein complex;GO:0031981//nuclear lumen
fd_812	--	188	8	5.0024	--	--	--	--	--	--	--	--	--	--	--	--	--	--	--	--	--	--	-	-	-
fd_813	GAAC01000659	350	37	12.4273	gi|225453843|ref|XP_002277773.1|	171	3e-42	PREDICTED: MADS-box protein [Vitis vinifera] >gi|95116634|gb|ABF56527.1| MADS-box protein [Vitis vinifera]	sp|O64645|SOC1_ARATH	158	1e-38	MADS-box protein SOC1 OS=Arabidopsis thaliana GN=SOC1 PE=1 SV=1	YPL089c	65.9	2e-11	COG5068	Regulator of arginine metabolism and related MADS box-containing transcription factors	K09264	2e-27	117	ath:AT4G18960	MADS-box transcription factor, plant	GO:0009725//response to hormone stimulus;GO:0010468//regulation of gene expression;GO:0006606//protein import into nucleus;GO:0009908//flower development;GO:0010074//maintenance of meristem identity;GO:0006351//transcription, DNA-dependent;GO:0006950//response to stress	GO:0030528//transcription regulator activity;GO:0003677//DNA binding	GO:0043231//intracellular membrane-bounded organelle
fd_814	GAAC01000660	352	130	43.4154	gi|30691134|ref|NP_174292.2|	177	2e-44	PDF6 (PREFOLDIN 6); unfolded protein binding [Arabidopsis thaliana] >gi|88011191|gb|ABD38916.1| At1g29990 [Arabidopsis thaliana]	sp|Q17Q89|PFD6_BOVIN	91.7	1e-18	Prefoldin subunit 6 OS=Bos taurus GN=PFDN6 PE=2 SV=1	SPAC3A11.13	65.5	2e-11	COG1382	Prefoldin, chaperonin cofactor	K04798	2e-49	190	vvi:100245160	prefoldin beta subunit	GO:0044267//cellular protein metabolic process	GO:0005515//protein binding	GO:0043234//protein complex;GO:0031410//cytoplasmic vesicle
fd_815	GAAC01000661	943	206	25.6802	gi|124360117|gb|ABN08133.1|	407	1e-112	Heat shock protein DnaJ [Medicago truncatula]	sp|Q9FL54|DNAJ6_ARATH	358	4e-98	Chaperone protein dnaJ 6 OS=Arabidopsis thaliana GN=ATJ6 PE=1 SV=1	SPAC1071.09c	105	1e-22	COG2214	DnaJ-class molecular chaperone	K09529	8e-122	433	vvi:100265910	DnaJ homolog subfamily C member 9	GO:0044267//cellular protein metabolic process	GO:0005515//protein binding	-
fd_816	GAAC01000662	236	70	34.8682	gi|224143281|ref|XP_002324903.1|	152	9e-37	chromatin remodeling complex subunit [Populus trichocarpa] >gi|222866337|gb|EEF03468.1| chromatin remodeling complex subunit [Populus trichocarpa]	sp|Q9S775|PKL_ARATH	152	8e-37	CHD3-type chromatin-remodeling factor PICKLE OS=Arabidopsis thaliana GN=PKL PE=1 SV=1	YER164w	72.8	1e-13	COG0553	Superfamily II DNA/RNA helicases, SNF2 family	K11643	6e-38	152	ath:AT2G25170	chromodomain-helicase-DNA-binding protein 4 [EC:3.6.1.-]	GO:0010468//regulation of gene expression;GO:0006350//transcription;GO:0048527//lateral root development;GO:0006464//protein modification process;GO:0009738//abscisic acid mediated signaling pathway;GO:0006325//chromatin organization	GO:0046914//transition metal ion binding;GO:0004672//protein kinase activity;GO:0003676//nucleic acid binding;GO:0004386//helicase activity;GO:0032559//adenyl ribonucleotide binding	GO:0043231//intracellular membrane-bounded organelle;GO:0044427//chromosomal part
fd_817	--	184	9	5.75	gi|129770485|gb|ABO31358.1|	134	3e-31	starch branching enzyme II-1 [Malus x domestica]	sp|Q08047|GLGB_MAIZE	130	2e-30	1,4-alpha-glucan-branching enzyme 2, chloroplastic/amyloplastic OS=Zea mays GN=SBE1 PE=1 SV=1	YEL011w	85.9	2e-17	COG0296	1,4-alpha-glucan branching enzyme	K00700	2e-32	133	rcu:RCOM_0022940	1,4-alpha-glucan branching enzyme [EC:2.4.1.18]	GO:0009250//glucan biosynthetic process	GO:0016798//hydrolase activity, acting on glycosyl bonds;GO:0043167//ion binding;GO:0016758//transferase activity, transferring hexosyl groups	GO:0009532//plastid stroma
fd_818	GAAC01000663	607	28	5.4227	gi|297796717|ref|XP_002866243.1|	178	2e-53	ubiquitin-specific protease 23 [Arabidopsis lyrata subsp. lyrata] >gi|297312078|gb|EFH42502.1| ubiquitin-specific protease 23 [Arabidopsis lyrata subsp. lyrata]	sp|Q9FPS4|UBP23_ARATH	173	8e-53	Ubiquitin carboxyl-terminal hydrolase 23 OS=Arabidopsis thaliana GN=UBP23 PE=2 SV=2	--	--	--	--	--	K11855	5e-71	209	vvi:100246880	ubiquitin carboxyl-terminal hydrolase 36/42 [EC:3.1.2.15]	GO:0019941//modification-dependent protein catabolic process	GO:0019783;GO:0046914//transition metal ion binding;GO:0016790//thiolester hydrolase activity	GO:0005622//intracellular
fd_819	GAAC01000664	256	13	5.9696	gi|109676332|gb|ABG37648.1|	66.6	8e-11	poly(ADP-ribose) glycohydrolase [Populus trichocarpa]	sp|Q9SKB3|PARG1_ARATH	65.9	8e-11	Poly(ADP-ribose) glycohydrolase 1 OS=Arabidopsis thaliana GN=PARG1 PE=1 SV=2	--	--	--	--	--	K07759	5e-13	69.3	pop:POPTR_216029	poly(ADP-ribose) glycohydrolase [EC:3.2.1.143]	GO:0044238//primary metabolic process;GO:0006952//defense response	GO:0004553//hydrolase activity, hydrolyzing O-glycosyl compounds	-
fd_820	--	173	101	68.6307	--	--	--	--	--	--	--	--	--	--	--	--	--	--	--	--	--	--	-	-	-
fd_821	GAAC01000665	270	20	8.7078	gi|225432770|ref|XP_002283255.1|	66.6	8e-11	PREDICTED: hypothetical protein [Vitis vinifera]	--	--	--	--	--	--	--	--	--	--	--	--	--	--	-	-	-
fd_822	GAAC01000666	305	38	14.6463	gi|259122996|gb|ACV92697.1|	169	7e-42	exocyst subunit EXO70 A1 [Brassica napus]	--	--	--	--	--	--	--	--	--	K07195	3e-43	169	ath:AT5G03540	exocyst complex component 7	GO:0048278//vesicle docking;GO:0010101	GO:0005488//binding	GO:0043234//protein complex;GO:0043231//intracellular membrane-bounded organelle;GO:0044444//cytoplasmic part;GO:0016020//membrane
fd_823	GAAC01000667	335	41	14.3874	gi|115436734|ref|NP_001043123.1|	204	3e-52	Os01g0496900 [Oryza sativa Japonica Group] >gi|113532654|dbj|BAF05037.1| Os01g0496900 [Oryza sativa Japonica Group]	--	--	--	--	--	--	--	--	--	--	--	--	--	--	-	-	GO:0043231//intracellular membrane-bounded organelle
fd_824	GAAC01000668	240	8	3.9185	gi|40850570|gb|AAR96002.1|	67	6e-11	retrotransposon-like protein [Musa acuminata]	--	--	--	--	--	--	--	--	--	--	--	--	--	--	-	GO:0046872//metal ion binding;GO:0003676//nucleic acid binding	-
fd_825	GAAC01000669	850	171	23.6494	gi|18397766|ref|NP_565370.1|	259	6e-97	UNC-50 family protein [Arabidopsis thaliana] >gi|14190389|gb|AAK55675.1|AF378872_1 At2g15240/F15A23.2 [Arabidopsis thaliana] >gi|15450545|gb|AAK96450.1| At2g15240/F15A23.2 [Arabidopsis thaliana] >gi|20197743|gb|AAD25568.2| expressed protein [Arabidopsis thaliana]	sp|Q54DD7|UNC50_DICDI	148	2e-46	Protein unc-50 homolog OS=Dictyostelium discoideum GN=DDB_G0292320 PE=3 SV=1	--	--	--	--	--	--	--	--	--	--	-	-	GO:0043231//intracellular membrane-bounded organelle
fd_826	GAAC01000670	378	45	13.9947	gi|226503057|ref|NP_001149329.1|	68.6	3e-12	vesicle-associated membrane protein 725 [Zea mays] >gi|195626438|gb|ACG35049.1| vesicle-associated membrane protein 725 [Zea mays]	sp|P47192|VA722_ARATH	71.2	2e-12	Vesicle-associated membrane protein 722 OS=Arabidopsis thaliana GN=VAMP722 PE=2 SV=2	--	--	--	--	--	K08511	8e-13	68.9	osa:4342638	vesicle-associated membrane protein 72	GO:0006405//RNA export from nucleus;GO:0009725//response to hormone stimulus	-	GO:0005635//nuclear envelope;GO:0031224//intrinsic to membrane
fd_827	GAAC01000671	1469	332	26.568	gi|297792719|ref|XP_002864244.1|	329	1e-139	NADH-dependent glutamate synthase 1 gene [Arabidopsis lyrata subsp. lyrata] >gi|297310079|gb|EFH40503.1| NADH-dependent glutamate synthase 1 gene [Arabidopsis lyrata subsp. lyrata]	sp|Q03460|GLSN_MEDSA	336	3e-91	Glutamate synthase [NADH], amyloplastic OS=Medicago sativa PE=1 SV=1	Rv3858c	166	4e-96	COG0493	NADPH-dependent glutamate synthase beta chain and related oxidoreductases	K00264	6e-141	328	ath:AT5G53460	glutamate synthase (NADPH/NADH) [EC:1.4.1.13 1.4.1.14]	-	-	-
fd_828	GAAC01000672	202	85	49.4664	gi|115452861|ref|NP_001050031.1|	97.4	4e-20	Os03g0334800 [Oryza sativa Japonica Group] >gi|108708011|gb|ABF95806.1| Lung seven transmembrane receptor family protein, expressed [Oryza sativa (japonica cultivar-group)] >gi|113548502|dbj|BAF11945.1| Os03g0334800 [Oryza sativa Japonica Group]	--	--	--	--	--	--	--	--	--	--	--	--	--	--	-	-	GO:0031224//intrinsic to membrane;GO:0031410//cytoplasmic vesicle
fd_829	GAAC01000673	248	17	8.0582	--	--	--	--	--	--	--	--	--	--	--	--	--	--	--	--	--	--	-	-	-
fd_830	GAAC01000674	1500	418	32.7588	gi|5091622|gb|AAD39610.1|AC007454_9	466	1e-130	F23M19.10 [Arabidopsis thaliana]	sp|Q54I39|IST1L_DICDI	117	2e-25	IST1-like protein OS=Dictyostelium discoideum GN=DDB_G0289029 PE=3 SV=1	--	--	--	--	--	--	--	--	--	--	-	-	-
fd_831	GAAC01000675	357	57	18.7694	gi|223452506|gb|ACM89580.1|	242	1e-63	serine/threonine protein kinase-like protein [Glycine max]	sp|P46573|APK1B_ARATH	175	7e-44	Protein kinase APK1B, chloroplastic OS=Arabidopsis thaliana GN=APK1B PE=2 SV=2	--	--	--	--	--	K00924	2e-46	180	osa:4337593	[EC:2.7.1.-]	GO:0006464//protein modification process	GO:0004702//receptor signaling protein serine/threonine kinase activity;GO:0032559//adenyl ribonucleotide binding	-
fd_832	GAAC01000676	718	162	26.5237	gi|224117452|ref|XP_002331716.1|	385	1e-106	Sec61 transport protein [Populus trichocarpa] >gi|222874322|gb|EEF11453.1| Sec61 transport protein [Populus trichocarpa]	sp|P38379|SC61A_PYRSA	284	5e-76	Protein transport protein Sec61 subunit alpha OS=Pyrenomonas salina PE=2 SV=1	SPBC354.02c	233	2e-61	COG0201	Preprotein translocase subunit SecY	K10956	1e-107	385	pop:POPTR_828572	protein transport protein SEC61 subunit alpha	-	-	-
fd_833	--	531	58	12.8403	gi|6578124|gb|AAF17705.1|AF033562_1	277	3e-81	ornithine carbamoyltransferase [Canavalia lineata] >gi|12003188|gb|AAG43481.1|AF203688_1 ornithine carbamoyltransferase OOCT1 [Canavalia lineata]	sp|Q43814|OTC_PEA	266	9e-79	Ornithine carbamoyltransferase, chloroplastic OS=Pisum sativum GN=ARGF PE=2 SV=1	PH0726	161	3e-43	COG0078	Ornithine carbamoyltransferase	K00611	1e-83	277	vvi:100243725	ornithine carbamoyltransferase [EC:2.1.3.3]	GO:0006351//transcription, DNA-dependent;GO:0006525//arginine metabolic process	GO:0016743//carboxyl- or carbamoyltransferase activity;GO:0031406//carboxylic acid binding	GO:0043234//protein complex;GO:0009532//plastid stroma
fd_834	GAAC01000677	938	218	27.321	gi|2970447|gb|AAC05981.1|	452	1e-126	aspartokinase-homoserine dehydrogenase [Glycine max]	sp|O81852|AKH2_ARATH	447	6e-125	Bifunctional aspartokinase/homoserine dehydrogenase 2, chloroplastic OS=Arabidopsis thaliana GN=AKHSDH2 PE=1 SV=1	SPBC776.03	254	2e-67	COG0460	Homoserine dehydrogenase	K12524	3e-131	464	vvi:100258602	bifunctional aspartokinase/homoserine dehydrogenase 1 [EC:2.7.2.4 1.1.1.3]	-	-	-
fd_835	GAAC01000678	666	151	26.653	gi|75313790|sp|Q9SQV1.1|RH40_ARATH	85.5	5e-16	RecName: Full=DEAD-box ATP-dependent RNA helicase 40	sp|Q55F68|CYAD_DICDI	101	4e-21	Adenylate cyclase, terminal-differentiation specific OS=Dictyostelium discoideum GN=acrA PE=1 SV=1	YBR112c	68.2	1e-11	COG0457	FOG: TPR repeat	K04498	3e-09	58.9	ppp:PHYPADRAFT_10108	E1A/CREB-binding protein [EC:2.3.1.48]	-	-	-
fd_836	GAAC01000679	366	72	23.1257	gi|84514139|gb|ABC59078.1|	151	3e-36	cytochrome P450 monooxygenase CYP72A59 [Medicago truncatula]	sp|Q05047|C72A1_CATRO	119	4e-27	Secologanin synthase OS=Catharanthus roseus GN=CYP72A1 PE=2 SV=1	--	--	--	--	--	K07424	4e-22	99.8	sbi:SORBI_03g028720	cytochrome P450, family 3, subfamily A [EC:1.14.14.1]	-	GO:0016491//oxidoreductase activity;GO:0005506//iron ion binding	-
fd_837	--	1099	208	22.2489	gi|115434506|ref|NP_001042011.1|	267	2e-70	Os01g0147200 [Oryza sativa Japonica Group] >gi|113531542|dbj|BAF03925.1| Os01g0147200 [Oryza sativa Japonica Group]	sp|Q3SWT4|IWS1_RAT	67	2e-16	Protein IWS1 homolog OS=Rattus norvegicus GN=Iws1 PE=2 SV=1	YLR106c	53.9	5e-07	COG5271	AAA ATPase containing von Willebrand factor type A (vWA) domain	K11984	3e-07	53.1	vvi:100266959	U4/U6.U5 tri-snRNP-associated protein 1	-	-	-
fd_838	GAAC01000680	365	107	34.4615	gi|164605535|dbj|BAF98601.1|	226	6e-59	CM0545.290.nc [Lotus japonicus]	sp|Q84WU2|UBP13_ARATH	207	2e-53	Ubiquitin carboxyl-terminal hydrolase 13 OS=Arabidopsis thaliana GN=UBP13 PE=1 SV=1	SPBC713.02c	55.1	3e-08	COG5077	Ubiquitin carboxyl-terminal hydrolase	K11838	2e-62	233	vvi:100252573	ubiquitin carboxyl-terminal hydrolase 7 [EC:3.1.2.15]	GO:0006259//DNA metabolic process;GO:0019941//modification-dependent protein catabolic process	GO:0043566//structure-specific DNA binding;GO:0016790//thiolester hydrolase activity	GO:0043231//intracellular membrane-bounded organelle
fd_839	GAAC01000681	496	67	15.8795	gi|42562204|ref|NP_564125.2|	145	3e-34	SAUL1 (SENESCENCE-ASSOCIATED E3 UBIQUITIN LIGASE 1); ubiquitin-protein ligase [Arabidopsis thaliana] >gi|75264018|sp|Q9LM76.1|PUB44_ARATH RecName: Full=U-box domain-containing protein 44; AltName: Full=Plant U-box protein 44 >gi|8886935|gb|AAF80621.1|AC069251_14 F2D10.27 [Arabidopsis thaliana]	sp|Q9LM76|PUB44_ARATH	145	2e-34	U-box domain-containing protein 44 OS=Arabidopsis thaliana GN=PUB44 PE=2 SV=1	--	--	--	--	--	--	--	--	--	--	GO:0032446//protein modification by small protein conjugation;GO:0015995//chlorophyll biosynthetic process;GO:0015996//chlorophyll catabolic process;GO:0009688//abscisic acid biosynthetic process;GO:0010260//organ senescence	GO:0005488//binding;GO:0019787//small conjugating protein ligase activity	GO:0043234//protein complex;GO:0016020//membrane
fd_840	GAAC01000682	414	40	11.358	gi|225430376|ref|XP_002282928.1|	50.1	2e-13	PREDICTED: hypothetical protein [Vitis vinifera]	--	--	--	--	--	--	--	--	--	--	--	--	--	--	-	-	-
fd_841	--	849	133	18.4157	gi|18378920|ref|NP_563645.1|	321	8e-87	FUS5 (FUSCA 5); MAP kinase kinase [Arabidopsis thaliana] >gi|55976565|sp|Q94JU3.1|CSN7_ARATH RecName: Full=COP9 signalosome complex subunit 7; Short=CSN complex subunit 7; AltName: Full=Protein FUSCA 5 >gi|13937161|gb|AAK50074.1|AF372934_1 At1g02090/T7I23_24 [Arabidopsis thaliana] >gi|18056671|gb|AAL58109.1|AF395066_1 CSN complex subunit 7ii [Arabidopsis thaliana] >gi|21593551|gb|AAM65518.1| FUS5…	sp|Q94JU3|CSN7_ARATH	321	4e-87	COP9 signalosome complex subunit 7 OS=Arabidopsis thaliana GN=CSN7 PE=1 SV=1	--	--	--	--	--	K12180	5e-99	357	vvi:100261627	COP9 signalosome complex subunit 7	GO:0030035//microspike assembly;GO:0000338//protein deneddylation;GO:0043623//cellular protein complex assembly;GO:0009639//response to red or far red light	GO:0008092//cytoskeletal protein binding;GO:0019904//protein domain specific binding	GO:0043231//intracellular membrane-bounded organelle;GO:0043234//protein complex
fd_842	GAAC01000683	597	38	7.4826	gi|297823451|ref|XP_002879608.1|	256	3e-90	ATPDR6/PDR6 [Arabidopsis lyrata subsp. lyrata] >gi|297325447|gb|EFH55867.1| ATPDR6/PDR6 [Arabidopsis lyrata subsp. lyrata]	sp|Q7PC84|AB39G_ARATH	254	1e-89	ABC transporter G family member 39 OS=Arabidopsis thaliana GN=ABCG39 PE=2 SV=1	SPCC18B5.01c_2	123	2e-28	COG1131	ABC-type multidrug transport system, ATPase component	K05681	9e-19	90.1	cme:CMS467C	ATP-binding cassette, subfamily G (WHITE), member 2	-	GO:0015604//phosphonate transmembrane transporter activity;GO:0017111//nucleoside-triphosphatase activity;GO:0032559//adenyl ribonucleotide binding	GO:0044464//cell part
fd_843	GAAC01000684	347	51	17.2776	gi|5080770|gb|AAD39280.1|AC007576_3	56.2	1e-07	Hypothetical protein [Arabidopsis thaliana]	--	--	--	--	--	--	--	--	--	--	--	--	--	--	-	-	-
fd_844	--	2058	455	25.9902	gi|226531524|ref|NP_001148960.1|	734	0	ATP-dependent RNA helicase dhh1 [Zea mays] >gi|195623636|gb|ACG33648.1| ATP-dependent RNA helicase dhh1 [Zea mays]	sp|Q6H7S2|RH8_ORYSJ	731	0	DEAD-box ATP-dependent RNA helicase 8 OS=Oryza sativa subsp. japonica GN=Os02g0641800 PE=2 SV=2	YDL160c	565	1e-160	COG0513	Superfamily II DNA and RNA helicases	K12614	0	754	rcu:RCOM_1614640	ATP-dependent RNA helicase DDX6/DHH1 [EC:3.6.4.13]	-	GO:0032559//adenyl ribonucleotide binding;GO:0042623//ATPase activity, coupled	-
fd_845	GAAC01000685	236	57	28.3927	--	--	--	--	--	--	--	--	--	--	--	--	--	--	--	--	--	--	-	-	-
fd_846	GAAC01000686	392	70	20.9921	gi|297810771|ref|XP_002873269.1|	259	7e-69	ubiquitin-specific protease 12 [Arabidopsis lyrata subsp. lyrata] >gi|297319106|gb|EFH49528.1| ubiquitin-specific protease 12 [Arabidopsis lyrata subsp. lyrata]	sp|Q84WU2|UBP13_ARATH	258	1e-68	Ubiquitin carboxyl-terminal hydrolase 13 OS=Arabidopsis thaliana GN=UBP13 PE=1 SV=1	SPBC713.02c	142	1e-34	COG5077	Ubiquitin carboxyl-terminal hydrolase	K11838	4e-71	262	pop:POPTR_256091	ubiquitin carboxyl-terminal hydrolase 7 [EC:3.1.2.15]	GO:0019941//modification-dependent protein catabolic process	GO:0019783;GO:0016790//thiolester hydrolase activity	-
fd_847	GAAC01000687	292	54	21.7397	gi|297850522|ref|XP_002893142.1|	168	1e-41	EMB1507 [Arabidopsis lyrata subsp. lyrata] >gi|297338984|gb|EFH69401.1| EMB1507 [Arabidopsis lyrata subsp. lyrata]	sp|Q55CI8|HELCL_DICDI	151	1e-36	Activating signal cointegrator 1 complex subunit 3-like OS=Dictyostelium discoideum GN=ascc3l PE=3 SV=1	SPAC9.03c	137	6e-33	COG1204	Superfamily II helicase	K12854	2e-48	187	vvi:100244096	pre-mRNA-splicing helicase BRR2 [EC:3.6.1.-]	GO:0003006//reproductive developmental process	GO:0042623//ATPase activity, coupled;GO:0032559//adenyl ribonucleotide binding	GO:0031981//nuclear lumen
fd_848	GAAC01000688	405	80	23.2209	gi|297596476|ref|NP_001042641.2|	101	2e-21	Os01g0259900 [Oryza sativa Japonica Group] >gi|255673077|dbj|BAF04555.2| Os01g0259900 [Oryza sativa Japonica Group]	--	--	--	--	--	--	--	--	--	--	--	--	--	--	-	-	-
fd_849	GAAC01000689	219	58	31.1334	--	--	--	--	--	--	--	--	--	--	--	--	--	--	--	--	--	--	-	-	-
fd_850	GAAC01000690	872	150	20.2217	gi|15222264|ref|NP_177683.1|	358	6e-98	transcription initiation factor IIF beta subunit (TFIIF-beta) family protein [Arabidopsis thaliana] >gi|9369371|gb|AAF87120.1|AC006434_16 F10A5.27 [Arabidopsis thaliana] >gi|11692842|gb|AAG40024.1|AF324673_1 At1g75700 [Arabidopsis thaliana] >gi|39545896|gb|AAR28011.1| TFIIF-beta 2 [Arabidopsis thaliana]	sp|O94424|T2FB_SCHPO	98.2	6e-20	Transcription initiation factor IIF subunit beta OS=Schizosaccharomyces pombe GN=tfg2 PE=1 SV=1	SPBC1198.13c	98.2	2e-20	COG5090	Transcription initiation factor IIF, small subunit (RAP30)	K03139	1e-125	445	vvi:100267659	transcription initiation factor TFIIF beta subunit	GO:0006352//transcription initiation	GO:0042623//ATPase activity, coupled;GO:0032559//adenyl ribonucleotide binding;GO:0003702//RNA polymerase II transcription factor activity	GO:0005667//transcription factor complex
fd_851	GAAC01000691	428	54	14.8318	gi|289540889|gb|ADD09566.1|	60.8	2e-11	galactose oxidase [Trifolium repens]	sp|Q9LUM6|FB157_ARATH	52	1e-06	F-box protein At3g17710 OS=Arabidopsis thaliana GN=At3g17710 PE=2 SV=1	--	--	--	--	--	K01051	6e-06	46.6	ath:AT5G04970	pectinesterase [EC:3.1.1.11]	-	-	-
fd_852	GAAC01000692	1033	168	19.1184	gi|226500186|ref|NP_001152322.1|	289	1e-166	T-complex protein 1 subunit gamma [Zea mays] >gi|195655091|gb|ACG47013.1| T-complex protein 1 subunit gamma [Zea mays]	sp|P50143|TCPG_XENLA	227	1e-108	T-complex protein 1 subunit gamma OS=Xenopus laevis GN=cct3 PE=2 SV=2	SPBC1A4.08c	217	1e-73	COG0459	Chaperonin GroEL (HSP60 family)	K09495	1e-167	289	zma:100285961	T-complex protein 1 subunit gamma	-	-	-
fd_853	GAAC01000693	661	110	19.563	gi|224110590|ref|XP_002315568.1|	384	1e-106	chromatin remodeling complex subunit [Populus trichocarpa] >gi|222864608|gb|EEF01739.1| chromatin remodeling complex subunit [Populus trichocarpa]	sp|Q7G8Y3|ISW2_ORYSJ	370	3e-102	Probable chromatin-remodeling complex ATPase chain OS=Oryza sativa subsp. japonica GN=Os01g0367900 PE=2 SV=2	ECU09g1890	145	6e-35	COG0553	Superfamily II DNA/RNA helicases, SNF2 family	K11654	1e-113	405	vvi:100244281	SWI/SNF-related matrix-associated actin-dependent regulator of chromatin subfamily A member 5 [EC:3.6.1.-]	GO:0006338//chromatin remodeling	GO:0003676//nucleic acid binding;GO:0003682//chromatin binding;GO:0017111//nucleoside-triphosphatase activity;GO:0032559//adenyl ribonucleotide binding	GO:0043234//protein complex;GO:0043231//intracellular membrane-bounded organelle
fd_854	GAAC01000694	520	46	10.3991	gi|46389755|dbj|BAD15108.1|	111	2e-42	ALG2-interacting protein X [Nicotiana tabacum]	sp|Q61085|RHPN1_MOUSE	56.6	2e-11	Rhophilin-1 OS=Mus musculus GN=Rhpn1 PE=1 SV=1	--	--	--	--	--	K12200	4e-40	104	pop:POPTR_820653	programmed cell death 6-interacting protein	-	-	-
fd_855	GAAC01000695	263	42	18.7731	gi|56967491|gb|AAW31900.1|	174	2e-43	calcium-dependent/calmodulin-independent protein kinase [Panax ginseng]	sp|A5A7I7|CDPK4_SOLTU	169	4e-42	Calcium-dependent protein kinase 4 OS=Solanum tuberosum GN=CPK4 PE=2 SV=1	--	--	--	--	--	K13412	2e-43	170	pop:POPTR_803966	calcium-dependent protein kinase [EC:2.7.11.1]	GO:0010118//stomatal movement;GO:0032412;GO:0009755//hormone-mediated signaling pathway;GO:0006464//protein modification process	GO:0004674//protein serine/threonine kinase activity;GO:0046872//metal ion binding;GO:0032559//adenyl ribonucleotide binding	GO:0044444//cytoplasmic part;GO:0016020//membrane
fd_856	GAAC01000696	1420	202	16.7227	gi|61162203|dbj|BAD91083.1|	462	0	beta-D-galactosidase [Pyrus pyrifolia]	sp|Q9SCV4|BGAL8_ARATH	461	0	Beta-galactosidase 8 OS=Arabidopsis thaliana GN=BGAL8 PE=2 SV=2	XF0840	115	2e-25	COG1874	Beta-galactosidase	K01190	5e-151	372	ath:AT3G52840	beta-galactosidase [EC:3.2.1.23]	GO:0044238//primary metabolic process	GO:0030246//carbohydrate binding;GO:0043167//ion binding;GO:0015925	GO:0031410//cytoplasmic vesicle;GO:0030312//external encapsulating structure
fd_857	GAAC01000697	1119	171	17.9643	gi|8978273|dbj|BAA98164.1|	507	1e-143	receptor protein kinase-like [Arabidopsis thaliana]	sp|Q9LT96|Y5977_ARATH	484	6e-136	Probable leucine-rich repeat receptor-like protein kinase At5g49770 OS=Arabidopsis thaliana GN=At5g49770 PE=2 SV=1	YAR019c	95.9	1e-19	COG0515	Serine/threonine protein kinase	K13430	3e-64	242	rcu:RCOM_1078760	serine/threonine-protein kinase PBS1 [EC:2.7.11.1]	-	-	-
fd_858	GAAC01000698	1189	119	11.7654	gi|30684540|ref|NP_193617.2|	239	4e-62	ATP binding / DNA binding / DNA-directed DNA polymerase/ nucleoside-triphosphatase/ nucleotide binding [Arabidopsis thaliana]	--	--	--	--	--	--	--	--	--	--	--	--	--	--	-	GO:0005488//binding;GO:0016740//transferase activity	-
fd_859	GAAC01000699	524	31	6.9546	--	--	--	--	--	--	--	--	--	--	--	--	--	--	--	--	--	--	-	-	-
fd_860	GAAC01000700	707	163	27.1026	gi|297833578|ref|XP_002884671.1|	303	1e-108	RabGAP/TBC domain-containing protein [Arabidopsis lyrata subsp. lyrata] >gi|297330511|gb|EFH60930.1| RabGAP/TBC domain-containing protein [Arabidopsis lyrata subsp. lyrata]	sp|Q28CB1|TBD2B_XENTR	113	2e-36	TBC1 domain family member 2B OS=Xenopus tropicalis GN=tbc1d2b PE=2 SV=1	SPAC4G8.04	98.2	2e-31	COG5210	GTPase-activating protein	--	--	--	--	--	GO:0032318	GO:0005099//Ras GTPase activator activity	GO:0044464//cell part
fd_861	GAAC01000701	419	108	30.3007	gi|297808063|ref|XP_002871915.1|	275	1e-73	ATSUG1 [Arabidopsis lyrata subsp. lyrata] >gi|297317752|gb|EFH48174.1| ATSUG1 [Arabidopsis lyrata subsp. lyrata]	sp|Q94BQ2|PRS8B_ARATH	275	6e-74	26S protease regulatory subunit 8 homolog B OS=Arabidopsis thaliana GN=RPT6B PE=2 SV=1	SPBC23G7.12c	253	6e-68	COG1222	ATP-dependent 26S proteasome regulatory subunit	K03066	7e-75	275	pop:POPTR_805071	26S proteasome regulatory subunit T6	GO:0019941//modification-dependent protein catabolic process	GO:0017111//nucleoside-triphosphatase activity;GO:0032559//adenyl ribonucleotide binding	GO:0005838//proteasome regulatory particle;GO:0043231//intracellular membrane-bounded organelle;GO:0016020//membrane
fd_862	GAAC01000702	207	29	16.4691	gi|15240483|ref|NP_198084.1|	108	1e-23	GID1C (GA INSENSITIVE DWARF1C); hydrolase [Arabidopsis thaliana] >gi|75331827|sp|Q940G6.1|GI1L3_ARATH RecName: Full=Probable gibberellin receptor GID1L3; AltName: Full=GID1-like protein 3 >gi|15451146|gb|AAK96844.1| Unknown protein [Arabidopsis thaliana]	sp|Q940G6|GI1L3_ARATH	108	8e-24	Probable gibberellin receptor GID1L3 OS=Arabidopsis thaliana GN=GID1L3 PE=1 SV=1	--	--	--	--	--	--	--	--	--	--	GO:0009312//oligosaccharide biosynthetic process;GO:0009740//gibberellic acid mediated signaling pathway;GO:0003006//reproductive developmental process	GO:0005488//binding;GO:0004871//signal transducer activity;GO:0003824//catalytic activity	GO:0043231//intracellular membrane-bounded organelle
fd_863	--	156	6	4.5214	--	--	--	--	--	--	--	--	--	--	--	--	--	--	--	--	--	--	-	-	-
fd_864	--	159	3	2.218	gi|297733914|emb|CBI15161.3|	70.9	4e-12	unnamed protein product [Vitis vinifera]	--	--	--	--	--	--	--	--	--	--	--	--	--	--	-	GO:0046914//transition metal ion binding	GO:0044464//cell part
fd_865	GAAC01000703	862	252	34.3666	--	--	--	--	--	--	--	--	--	--	--	--	--	--	--	--	--	--	-	-	-
fd_866	GAAC01000704	874	207	27.8421	gi|124360020|gb|ABN08036.1|	354	7e-97	Peptidase S1 and S6, chymotrypsin/Hap [Medicago truncatula]	sp|P83110|HTRA3_HUMAN	179	2e-44	Probable serine protease HTRA3 OS=Homo sapiens GN=HTRA3 PE=1 SV=2	sll1427	186	3e-47	COG0265	Trypsin-like serine proteases, typically periplasmic, contain C-terminal PDZ domain	K01362	8e-95	343	ath:AT5G27660	[EC:3.4.21.-]	GO:0019538//protein metabolic process	GO:0005488//binding;GO:0004175//endopeptidase activity	-
fd_867	GAAC01000705	226	6	3.1209	gi|297802830|ref|XP_002869299.1|	150	3e-36	transcriptional factor B3 family protein [Arabidopsis lyrata subsp. lyrata] >gi|297315135|gb|EFH45558.1| transcriptional factor B3 family protein [Arabidopsis lyrata subsp. lyrata]	sp|Q5CCK4|VAL2_ARATH	150	2e-36	B3 domain-containing transcription repressor VAL2 OS=Arabidopsis thaliana GN=VAL2 PE=2 SV=1	--	--	--	--	--	--	--	--	--	--	GO:0009845//seed germination;GO:0010431//seed maturation;GO:0010468//regulation of gene expression;GO:0007167//enzyme linked receptor protein signaling pathway;GO:0006351//transcription, DNA-dependent;GO:0006464//protein modification process	GO:0016772//transferase activity, transferring phosphorus-containing groups;GO:0003676//nucleic acid binding;GO:0046914//transition metal ion binding;GO:0032559//adenyl ribonucleotide binding	GO:0043231//intracellular membrane-bounded organelle
fd_868	GAAC01000706	1260	294	27.4296	gi|3121837|sp|O04940.1|CDS1_SOLTU	664	0	RecName: Full=Phosphatidate cytidylyltransferase; AltName: Full=CDP-diglyceride pyrophosphorylase; AltName: Full=CDP-diglyceride synthase; AltName: Full=CDP-diacylglycerol synthase; Short=CDS; AltName: Full=CTP:phosphatidate cytidylyltransferase; AltName: Full=CDP-DG synthase; AltName: Full=CDP-DAG synthase >gi|2182104|emb|CAA63004.1| CDP-diacylglycerol synthetase [Solanum tuberosum]	sp|O04940|CDS1_SOLTU	664	0	Phosphatidate cytidylyltransferase OS=Solanum tuberosum GN=CDS1 PE=2 SV=1	SPBC13A2.03	282	8e-76	COG0575	CDP-diglyceride synthetase	K00981	0	669	rcu:RCOM_0902650	phosphatidate cytidylyltransferase [EC:2.7.7.41]	GO:0006644//phospholipid metabolic process	GO:0070567	GO:0031224//intrinsic to membrane
fd_869	GAAC01000707	214	17	9.3385	--	--	--	--	--	--	--	--	--	--	--	--	--	--	--	--	--	--	-	-	-
fd_870	--	183	11	7.0662	--	--	--	--	--	--	--	--	--	--	--	--	--	--	--	--	--	--	-	-	-
fd_871	GAAC01000708	620	36	6.8258	gi|297849114|ref|XP_002892438.1|	100	1e-20	ATLIG1 [Arabidopsis lyrata subsp. lyrata] >gi|297338280|gb|EFH68697.1| ATLIG1 [Arabidopsis lyrata subsp. lyrata]	sp|Q42572|DNLI1_ARATH	97.8	5e-20	DNA ligase 1 OS=Arabidopsis thaliana GN=At1g08130 PE=2 SV=2	--	--	--	--	--	K10747	8e-23	103	vvi:100256907	DNA ligase 1 [EC:6.5.1.1]	GO:0044238//primary metabolic process;GO:0044260	GO:0005488//binding;GO:0003824//catalytic activity	GO:0043231//intracellular membrane-bounded organelle
fd_872	GAAC01000709	1028	97	11.0923	gi|30685465|ref|NP_193883.2|	460	1e-130	transducin family protein / WD-40 repeat family protein [Arabidopsis thaliana]	sp|Q60525|WAP53_MESAU	237	9e-62	Telomerase Cajal body protein 1 OS=Mesocricetus auratus GN=Wrap53 PE=2 SV=1	all0438_2	64.3	3e-10	COG2319	FOG: WD40 repeat	K12857	4e-08	55.8	ath:AT2G43770	Prp8 binding protein	-	-	-
fd_873	GAAC01000710	353	31	10.3236	gi|18415316|ref|NP_567588.1|	134	3e-31	nodulin-related [Arabidopsis thaliana]	--	--	--	--	--	--	--	--	--	--	--	--	--	--	-	-	GO:0044464//cell part
fd_874	--	425	14	3.8724	gi|297801970|ref|XP_002868869.1|	173	6e-43	dihydrouridine synthase family protein [Arabidopsis lyrata subsp. lyrata] >gi|297314705|gb|EFH45128.1| dihydrouridine synthase family protein [Arabidopsis lyrata subsp. lyrata]	sp|Q9T0J6|DUS3L_ARATH	172	6e-43	tRNA-dihydrouridine synthase 3-like OS=Arabidopsis thaliana GN=At4g38890 PE=2 SV=1	SPAC16.04	81.3	5e-16	COG0042	tRNA-dihydrouridine synthase	K05544	4e-51	196	vvi:100262408	tRNA-dihydrouridine synthase 3 [EC:1.-.-.-]	GO:0006399//tRNA metabolic process	GO:0030554//adenyl nucleotide binding;GO:0046914//transition metal ion binding;GO:0016627//oxidoreductase activity, acting on the CH-CH group of donors	GO:0043231//intracellular membrane-bounded organelle
fd_875	--	165	33	23.5111	--	--	--	--	--	--	--	--	--	--	--	--	--	--	--	--	--	--	-	-	-
fd_876	GAAC01000711	404	110	32.0077	gi|262181251|gb|ACY29538.1|	99.8	9e-21	LATD/NIP [Medicago truncatula]	sp|Q9M817|PTR2X_ARATH	97.8	2e-20	Probable peptide transporter At1g52190 OS=Arabidopsis thaliana GN=At1g52190 PE=1 SV=1	--	--	--	--	--	K03305	2e-12	67.8	pop:POPTR_752070	proton-dependent oligopeptide transporter, POT family	GO:0015833//peptide transport	-	GO:0016020//membrane
fd_877	GAAC01000712	322	42	15.3333	gi|40233152|gb|AAR83345.1|	202	9e-52	cytosolic phosphoglucomutase [Populus tomentosa]	sp|Q9ZSQ4|PGMC_POPTN	202	5e-52	Phosphoglucomutase, cytoplasmic OS=Populus tremula GN=PGM1 PE=2 SV=1	BMEI1886	119	2e-27	COG0033	Phosphoglucomutase	K01835	3e-51	196	ath:AT1G23190	phosphoglucomutase [EC:5.4.2.2]	GO:0010038//response to metal ion;GO:0019318//hexose metabolic process	GO:0046872//metal ion binding;GO:0016868//intramolecular transferase activity, phosphotransferases	GO:0016020//membrane;GO:0009536//plastid
fd_878	GAAC01000713	773	266	40.4525	gi|6016226|sp|O22300.1|LET12_SOLLC	297	1e-79	RecName: Full=Homeobox protein knotted-1-like LET12 >gi|2529703|gb|AAC49918.1| class II knotted-like homeodomain protein [Solanum lycopersicum]	sp|O22300|LET12_SOLLC	297	6e-80	Homeobox protein knotted-1-like LET12 OS=Solanum lycopersicum GN=LET12 PE=2 SV=1	--	--	--	--	--	--	--	--	--	--	GO:0009314//response to radiation;GO:0009987//cellular process;GO:0009720//detection of hormone stimulus;GO:0034097//response to cytokine stimulus	GO:0005488//binding	GO:0043231//intracellular membrane-bounded organelle;GO:0044444//cytoplasmic part
fd_879	--	191	5	3.0774	--	--	--	--	--	--	--	--	--	--	--	--	--	--	--	--	--	--	-	-	-
fd_880	GAAC01000714	335	47	16.4929	gi|195647616|gb|ACG43276.1|	170	5e-42	pre-mRNA cleavage complex II protein Clp1 [Zea mays]	sp|Q54N48|CLP1_DICDI	106	5e-23	Protein CLP1 homolog OS=Dictyostelium discoideum GN=clp1 PE=3 SV=1	--	--	--	--	--	--	--	--	--	--	GO:0048856//anatomical structure development;GO:0003006//reproductive developmental process;GO:0009791//post-embryonic development;GO:0006396//RNA processing	GO:0005488//binding	GO:0043234//protein complex;GO:0043231//intracellular membrane-bounded organelle
fd_881	GAAC01000715	1125	284	29.6762	gi|115477753|ref|NP_001062472.1|	315	7e-85	Os08g0556000 [Oryza sativa Japonica Group] >gi|113624441|dbj|BAF24386.1| Os08g0556000 [Oryza sativa Japonica Group]	sp|Q9BYJ9|YTHD1_HUMAN	213	2e-54	YTH domain family protein 1 OS=Homo sapiens GN=YTHDF1 PE=1 SV=1	--	--	--	--	--	--	--	--	--	--	-	-	-
fd_882	GAAC01000716	359	29	9.4961	--	--	--	--	--	--	--	--	--	--	--	--	--	--	--	--	--	--	-	-	-
fd_883	GAAC01000717	409	253	72.7177	gi|225439872|ref|XP_002274877.1|	117	5e-26	PREDICTED: hypothetical protein [Vitis vinifera]	--	--	--	--	--	--	--	--	--	--	--	--	--	--	-	-	-
fd_884	GAAC01000718	567	23	4.7686	gi|82570159|gb|ABB83643.1|	73.6	3e-17	PIF-like orf1 [Daucus carota]	--	--	--	--	--	--	--	--	--	--	--	--	--	--	-	-	-
fd_885	GAAC01000719	223	8	4.2172	--	--	--	--	--	--	--	--	--	--	--	--	--	--	--	--	--	--	-	-	-
fd_886	GAAC01000720	439	32	8.569	gi|53792621|dbj|BAD53635.1|	53.1	5e-11	F-box family protein-like [Oryza sativa Japonica Group]	--	--	--	--	--	--	--	--	--	--	--	--	--	--	-	-	GO:0031410//cytoplasmic vesicle
fd_887	GAAC01000721	1001	154	18.0855	gi|30685384|ref|NP_567623.2|	457	1e-128	HSA32 (HEAT-STRESS-ASSOCIATED 32); catalytic [Arabidopsis thaliana]	sp|O27710|PSLS_METTH	69.3	4e-11	Phosphosulfolactate synthase OS=Methanobacterium thermoautotrophicum GN=comA PE=3 SV=1	Cgl2487	198	1e-50	COG1809	Uncharacterized conserved protein	--	--	--	--	--	GO:0009108//coenzyme biosynthetic process	-	-
fd_888	GAAC01000722	439	68	18.2091	gi|22327858|ref|NP_200371.2|	172	1e-42	agenet domain-containing protein / bromo-adjacent homology (BAH) domain-containing protein [Arabidopsis thaliana] >gi|186532338|ref|NP_001119443.1| agenet domain-containing protein / bromo-adjacent homology (BAH) domain-containing protein [Arabidopsis thaliana] >gi|18087548|gb|AAL58906.1|AF462815_1 AT5g55600/MDF20_4 [Arabidopsis thaliana] >gi|24111271|gb|AAN46759.1| At5g55600/MDF20_4 [Arabidopsis…	--	--	--	--	--	--	--	--	--	--	--	--	--	--	-	GO:0003676//nucleic acid binding	-
fd_889	GAAC01000723	873	107	14.4083	gi|224054324|ref|XP_002298203.1|	275	5e-73	amidase family protein [Populus trichocarpa] >gi|222845461|gb|EEE83008.1| amidase family protein [Populus trichocarpa]	sp|Q96EQ0|SGTB_HUMAN	95.9	3e-19	Small glutamine-rich tetratricopeptide repeat-containing protein beta OS=Homo sapiens GN=SGTB PE=1 SV=1	SPAC17G6.19c	79	1e-14	COG0457	FOG: TPR repeat	K04460	4e-17	85.5	osa:4338070	protein phosphatase 5 [EC:3.1.3.16]	-	GO:0016879//ligase activity, forming carbon-nitrogen bonds;GO:0016811//hydrolase activity, acting on carbon-nitrogen (but not peptide) bonds, in linear amides;GO:0005488//binding	GO:0044464//cell part
fd_890	GAAC01000724	250	14	6.5831	gi|37992755|gb|AAR06584.1|	83.6	6e-16	glycinamide ribonucleotide synthetase [Nicotiana tabacum]	sp|P52420|PUR2_ARATH	77.4	2e-14	Phosphoribosylamine--glycine ligase, chloroplastic OS=Arabidopsis thaliana GN=PUR2 PE=2 SV=2	SMc00993	55.8	2e-08	COG0151	Phosphoribosylamine-glycine ligase	K01945	3e-19	89.7	pop:POPTR_1113209	phosphoribosylamine--glycine ligase [EC:6.3.4.13]	GO:0006144//purine base metabolic process;GO:0006163//purine nucleotide metabolic process	GO:0016879//ligase activity, forming carbon-nitrogen bonds;GO:0032559//adenyl ribonucleotide binding	GO:0031410//cytoplasmic vesicle;GO:0009536//plastid
fd_891	--	778	124	18.7364	gi|110622992|emb|CAJ55406.1|	248	2e-71	ADP-sugar diphosphatase [Solanum tuberosum]	sp|Q9SZ63|NUD14_ARATH	236	2e-65	Nudix hydrolase 14, chloroplastic OS=Arabidopsis thaliana GN=NUDT14 PE=1 SV=2	APE1481	50.1	4e-06	COG0494	NTP pyrophosphohydrolases including oxidative damage repair enzymes	--	--	--	--	--	-	GO:0019144//ADP-sugar diphosphatase activity	GO:0009536//plastid
fd_892	GAAC01000725	737	191	30.4656	gi|45476565|gb|AAS65948.1|	192	4e-48	At5g11600 [Arabidopsis thaliana] >gi|46359849|gb|AAS88788.1| At5g11600 [Arabidopsis thaliana]	sp|Q9U7E0|ATRX_CAEEL	50.8	9e-06	Transcriptional regulator ATRX homolog OS=Caenorhabditis elegans GN=xnp-1 PE=1 SV=1	--	--	--	--	--	--	--	--	--	--	-	-	GO:0043231//intracellular membrane-bounded organelle
fd_893	GAAC01000726	238	16	7.9029	--	--	--	--	--	--	--	--	--	--	--	--	--	--	--	--	--	--	-	-	-
fd_894	--	189	2	1.244	gi|144923530|gb|ABE80159.2|	55.5	2e-07	Tetratricopeptide-like helical [Medicago truncatula]	sp|Q3ECK2|PPR92_ARATH	50.4	3e-06	Pentatricopeptide repeat-containing protein At1g62680, mitochondrial OS=Arabidopsis thaliana GN=At1g62680 PE=2 SV=2	--	--	--	--	--	--	--	--	--	--	-	-	-
fd_895	GAAC01000727	201	18	10.5274	gi|225429462|ref|XP_002278761.1|	82	2e-15	PREDICTED: hypothetical protein [Vitis vinifera]	sp|O16005|OPSD_SEPOF	54.7	2e-07	Rhodopsin OS=Sepia officinalis GN=RHO PE=2 SV=1	--	--	--	--	--	K13210	7e-17	82	vvi:100259454	far upstream element-binding protein	-	-	-
fd_896	GAAC01000728	245	3	1.4395	gi|124360970|gb|ABN08942.1|	73.6	7e-13	Quinonprotein alcohol dehydrogenase-like [Medicago truncatula]	--	--	--	--	--	--	--	--	--	--	--	--	--	--	-	GO:0046914//transition metal ion binding;GO:0003676//nucleic acid binding;GO:0005515//protein binding	-
fd_897	GAAC01000729	1005	233	27.2542	gi|224145931|ref|XP_002325817.1|	652	0	cellulose synthase-like protein [Populus trichocarpa] >gi|222862692|gb|EEF00199.1| cellulose synthase-like protein [Populus trichocarpa]	sp|Q9LFL0|CSLD2_ARATH	649	0	Cellulose synthase-like protein D2 OS=Arabidopsis thaliana GN=CSLD2 PE=2 SV=1	alr3757	79	1e-14	COG1215	Glycosyltransferases, probably involved in cell wall biogenesis	K00770	3e-162	567	vvi:100243459	1,4-beta-D-xylan synthase [EC:2.4.2.24]	GO:0045229//external encapsulating structure organization;GO:0048588;GO:0009250//glucan biosynthetic process;GO:0042546//cell wall biogenesis;GO:0006950//response to stress	GO:0016759//cellulose synthase activity	GO:0031228//intrinsic to Golgi membrane
fd_898	GAAC01000730	249	5	2.3606	gi|224110992|ref|XP_002332999.1|	50.4	6e-06	cc-nbs-lrr resistance protein [Populus trichocarpa] >gi|222834484|gb|EEE72961.1| cc-nbs-lrr resistance protein [Populus trichocarpa]	--	--	--	--	--	--	--	--	--	--	--	--	--	--	-	-	-
fd_899	--	648	106	19.2298	gi|297806369|ref|XP_002871068.1|	326	1e-100	sugar-dependent1 [Arabidopsis lyrata subsp. lyrata] >gi|297316905|gb|EFH47327.1| sugar-dependent1 [Arabidopsis lyrata subsp. lyrata]	sp|P36165|TGL4_YEAST	117	8e-26	Lipase 4 OS=Saccharomyces cerevisiae GN=TGL4 PE=1 SV=1	YKR089c	117	2e-26	COG1752	Predicted esterase of the alpha-beta hydrolase superfamily	K07001	2e-107	335	vvi:100258980		GO:0006641//triglyceride metabolic process	GO:0032561//guanyl ribonucleotide binding;GO:0003824//catalytic activity	GO:0005811//lipid particle
fd_900	GAAC01000731	597	115	22.6447	gi|297831216|ref|XP_002883490.1|	183	1e-45	transaminase [Arabidopsis lyrata subsp. lyrata] >gi|297329330|gb|EFH59749.1| transaminase [Arabidopsis lyrata subsp. lyrata]	sp|Q08DQ2|GFPT2_BOVIN	123	7e-28	Glucosamine--fructose-6-phosphate aminotransferase [isomerizing] 2 OS=Bos taurus GN=GFPT2 PE=1 SV=1	SPBC12C2.11	107	2e-23	COG0449	Glucosamine 6-phosphate synthetase, contains amidotransferase and phosphosugar isomerase domains	K00820	1e-53	206	rcu:RCOM_1077800	glucosamine--fructose-6-phosphate aminotransferase (isomerizing) [EC:2.6.1.16]	GO:0005975//carbohydrate metabolic process	GO:0030246//carbohydrate binding;GO:0008483//transaminase activity	GO:0043231//intracellular membrane-bounded organelle
fd_901	--	168	63	44.0833	gi|224111880|ref|XP_002316010.1|	76.6	8e-14	cytochrome P450 [Populus trichocarpa] >gi|222865050|gb|EEF02181.1| cytochrome P450 [Populus trichocarpa]	--	--	--	--	--	--	--	--	--	--	--	--	--	--	GO:0008152//metabolic process	GO:0016491//oxidoreductase activity;GO:0005506//iron ion binding	-
fd_902	GAAC01000732	716	80	13.1347	gi|75100042|sp|O81027.2|HMGCL_ARATH	119	3e-26	RecName: Full=Hydroxymethylglutaryl-CoA lyase, mitochondrial; Short=HMG-CoA lyase; Short=HL; AltName: Full=3-hydroxy-3-methylglutarate-CoA lyase	sp|O81027|HMGCL_ARATH	119	1e-26	Hydroxymethylglutaryl-CoA lyase, mitochondrial OS=Arabidopsis thaliana GN=HMGCL PE=1 SV=2	RSc0261	75.1	1e-13	COG0119	Isopropylmalate/homocitrate/citramalate synthases	K01640	7e-30	127	pop:POPTR_833174	hydroxymethylglutaryl-CoA lyase [EC:4.1.3.4]	GO:0009081//branched chain family amino acid metabolic process	GO:0016833//oxo-acid-lyase activity	GO:0043231//intracellular membrane-bounded organelle
fd_903	GAAC01000733	685	161	27.6298	gi|292677823|dbj|BAI99253.1|	95.1	6e-19	trehalose 6-phosphate phosphatase [Nicotiana tabacum]	--	--	--	--	--	--	--	--	--	--	--	--	--	--	GO:0005991//trehalose metabolic process	GO:0019203//carbohydrate phosphatase activity	-
fd_904	GAAC01000734	266	187	82.6424	gi|297851412|ref|XP_002893587.1|	149	1e-35	glycyl-tRNA synthetase [Arabidopsis lyrata subsp. lyrata] >gi|297339429|gb|EFH69846.1| glycyl-tRNA synthetase [Arabidopsis lyrata subsp. lyrata]	sp|O23627|SYGM1_ARATH	149	5e-36	Glycyl-tRNA synthetase 1, mitochondrial OS=Arabidopsis thaliana GN=GLYRS-1 PE=2 SV=1	SPAC3F10.03	71.2	4e-13	COG0423	Glycyl-tRNA synthetase (class II)	K01880	3e-38	152	vvi:100257704	glycyl-tRNA synthetase [EC:6.1.1.14]	GO:0006418//tRNA aminoacylation for protein translation;GO:0010038//response to metal ion	GO:0004812//aminoacyl-tRNA ligase activity;GO:0032559//adenyl ribonucleotide binding	GO:0043231//intracellular membrane-bounded organelle
fd_905	GAAC01000735	265	10	4.4361	gi|11558192|emb|CAC17702.1|	121	2e-27	transcription factor (E2F) [Chenopodium rubrum]	--	--	--	--	--	--	--	--	--	--	--	--	--	--	GO:0045787//positive regulation of cell cycle;GO:0009725//response to hormone stimulus;GO:0010468//regulation of gene expression;GO:0006351//transcription, DNA-dependent;GO:0000904//cell morphogenesis involved in differentiation	GO:0003676//nucleic acid binding	GO:0043231//intracellular membrane-bounded organelle;GO:0043234//protein complex
fd_906	GAAC01000736	700	98	16.4578	gi|115439815|ref|NP_001044187.1|	53.5	2e-06	Os01g0738300 [Oryza sativa Japonica Group] >gi|113533718|dbj|BAF06101.1| Os01g0738300 [Oryza sativa Japonica Group]	sp|Q75JC9|Y8484_DICDI	73.6	1e-12	Uncharacterized protein DDB_G0271670 OS=Dictyostelium discoideum GN=DDB_G0271670 PE=4 SV=1	XF1267	51.6	1e-06	COG5297	Cellobiohydrolase A (1,4-beta-cellobiosidase A)	K13210	1e-13	73.6	rcu:RCOM_0742410	far upstream element-binding protein	-	GO:0003824//catalytic activity	-
fd_907	GAAC01000737	283	29	12.0463	gi|124359218|gb|ABN05729.1|	63.9	5e-10	Amidase [Medicago truncatula]	--	--	--	--	--	--	--	--	--	--	--	--	--	--	GO:0006952//defense response	GO:0016811//hydrolase activity, acting on carbon-nitrogen (but not peptide) bonds, in linear amides;GO:0016879//ligase activity, forming carbon-nitrogen bonds	GO:0043231//intracellular membrane-bounded organelle;GO:0016020//membrane
fd_908	GAAC01000738	1099	194	20.7514	gi|209954703|dbj|BAG80542.1|	481	1e-135	glycosyltransferase [Lycium barbarum]	sp|Q9SK82|COGT2_ARATH	433	1e-120	Cytokinin-O-glucosyltransferase 2 OS=Arabidopsis thaliana GN=UGT85A1 PE=1 SV=1	--	--	--	--	--	K13030	4e-95	345	sbi:SORBI_01g001220	cyanohydrin beta-glucosyltransferase [EC:2.4.1.85]	-	-	-
fd_909	--	637	27	4.9827	--	--	--	--	--	--	--	--	--	--	--	--	--	--	--	--	--	--	-	-	-
fd_910	GAAC01000739	269	6	2.6221	--	--	--	--	--	--	--	--	--	--	--	--	--	--	--	--	--	--	-	-	-
fd_911	--	170	21	14.5216	--	--	--	--	--	--	--	--	--	--	--	--	--	--	--	--	--	--	-	-	-
fd_912	GAAC01000740	308	22	8.3968	--	--	--	--	--	--	--	--	--	--	--	--	--	--	--	--	--	--	-	-	-
fd_913	GAAC01000741	426	153	42.2207	gi|225449428|ref|XP_002277973.1|	242	1e-63	PREDICTED: similar to phosphoribosylformylglycinamidine synthase [Vitis vinifera]	sp|Q9M8D3|PUR4_ARATH	228	1e-59	Probable phosphoribosylformylglycinamidine synthase, chloroplastic OS=Arabidopsis thaliana GN=At1g74260 PE=1 SV=1	RSc1722_2	109	1e-24	COG0047	Phosphoribosylformylglycinamidine (FGAM) synthase, glutamine amidotransferase domain	K01952	2e-65	244	pop:POPTR_882858	phosphoribosylformylglycinamidine synthase [EC:6.3.5.3]	GO:0006188//IMP biosynthetic process	GO:0016884//carbon-nitrogen ligase activity, with glutamine as amido-N-donor	GO:0043231//intracellular membrane-bounded organelle
fd_914	GAAC01000742	1146	169	17.3359	gi|115451545|ref|NP_001049373.1|	176	7e-43	Os03g0214900 [Oryza sativa Japonica Group] >gi|108706836|gb|ABF94631.1| expressed protein [Oryza sativa (japonica cultivar-group)] >gi|113547844|dbj|BAF11287.1| Os03g0214900 [Oryza sativa Japonica Group]	sp|Q9LIH5|C3H38_ARATH	106	3e-22	Zinc finger CCCH domain-containing protein 38 OS=Arabidopsis thaliana GN=At3g18640 PE=1 SV=1	--	--	--	--	--	--	--	--	--	--	-	GO:0046914//transition metal ion binding;GO:0003676//nucleic acid binding	-
fd_915	GAAC01000743	1003	300	35.1612	gi|297836953|ref|XP_002886358.1|	546	1e-169	6-phosphogluconate dehydrogenase family protein [Arabidopsis lyrata subsp. lyrata] >gi|297332199|gb|EFH62617.1| 6-phosphogluconate dehydrogenase family protein [Arabidopsis lyrata subsp. lyrata]	sp|P21577|6PGD_SYNE7	347	1e-102	6-phosphogluconate dehydrogenase, decarboxylating OS=Synechococcus elongatus (strain PCC 7942) GN=gnd PE=1 SV=4	alr5275	329	6e-98	COG0362	6-phosphogluconate dehydrogenase	K00033	4e-174	556	vvi:100241717	6-phosphogluconate dehydrogenase [EC:1.1.1.44]	-	-	-
fd_916	GAAC01000744	354	30	9.9623	gi|296149181|gb|ADG96405.1|	167	4e-41	S-locus receptor kinase [Olea europaea]	sp|Q8L7G3|CRK7_ARATH	107	2e-23	Cysteine-rich receptor-like protein kinase 7 OS=Arabidopsis thaliana GN=CRK7 PE=2 SV=1	--	--	--	--	--	K13418	1e-11	64.7	vvi:100247683	somatic embryogenesis receptor kinase 1 [EC:2.7.10.1 2.7.11.1]	GO:0006464//protein modification process;GO:0008037//cell recognition	GO:0030246//carbohydrate binding;GO:0004702//receptor signaling protein serine/threonine kinase activity;GO:0032559//adenyl ribonucleotide binding	-
fd_917	GAAC01000745	214	9	4.9439	gi|290578970|gb|ADD51363.1|	107	4e-23	B2-type cyclin [Malus x domestica]	sp|P46277|CCNB1_MEDVA	106	4e-23	G2/mitotic-specific cyclin-1 OS=Medicago varia PE=2 SV=1	SPBC582.03	60.8	6e-10	COG5024	Cyclin	K05868	2e-28	120	pop:POPTR_831404	cyclin B	GO:0032446//protein modification by small protein conjugation;GO:0000087//M phase of mitotic cell cycle	GO:0019887//protein kinase regulator activity;GO:0019787//small conjugating protein ligase activity	GO:0043234//protein complex;GO:0043231//intracellular membrane-bounded organelle
fd_918	GAAC01000746	215	11	6.0145	gi|13161535|emb|CAC33017.1|	53.1	9e-07	hypothetical protein [Antirrhinum hispanicum]	--	--	--	--	--	--	--	--	--	--	--	--	--	--	-	GO:0003676//nucleic acid binding	-
fd_919	GAAC01000747	405	391	113.492	gi|94466659|emb|CAJ44458.1|	179	9e-45	ALY protein [Nicotiana benthamiana]	sp|Q28FB9|THOC4_XENTR	97.8	2e-20	THO complex subunit 4 OS=Xenopus tropicalis GN=thoc4 PE=2 SV=1	--	--	--	--	--	K12881	3e-50	193	vvi:100257009	THO complex subunit 4	-	GO:0005488//binding	GO:0043231//intracellular membrane-bounded organelle
fd_920	GAAC01000748	360	36	11.7556	gi|123187087|gb|ABM69253.1|	180	5e-45	dehydroascorbate reductase [Solanum tuberosum] >gi|215794047|gb|ACJ70069.1| dehydroascorbate reductase [Solanum tuberosum]	sp|Q9FWR4|DHAR1_ARATH	128	9e-30	Glutathione S-transferase DHAR1, mitochondrial OS=Arabidopsis thaliana GN=DHAR1 PE=1 SV=1	--	--	--	--	--	--	--	--	--	--	GO:0008152//metabolic process	GO:0015038//glutathione disulfide oxidoreductase activity	GO:0043231//intracellular membrane-bounded organelle
fd_921	GAAC01000749	335	410	143.874	--	--	--	--	--	--	--	--	--	--	--	--	--	--	--	--	--	--	-	-	-
fd_922	GAAC01000750	260	11	4.9735	--	--	--	--	--	--	--	--	--	--	--	--	--	--	--	--	--	--	-	-	-
fd_923	GAAC01000751	463	60	15.234	gi|10177800|dbj|BAB11291.1|	51.2	4e-06	receptor protein kinase-like protein [Arabidopsis thaliana]	sp|Q17RH7|TPRXL_HUMAN	49.7	7e-06	Putative protein TPRXL OS=Homo sapiens GN=TPRXL PE=5 SV=2	--	--	--	--	--	--	--	--	--	--	-	GO:0005488//binding;GO:0004672//protein kinase activity	-
fd_924	GAAC01000752	210	27	15.1143	gi|224134218|ref|XP_002327785.1|	83.2	8e-16	cc-nbs-lrr resistance protein [Populus trichocarpa] >gi|222836870|gb|EEE75263.1| cc-nbs-lrr resistance protein [Populus trichocarpa]	sp|Q38834|R13L4_ARATH	73.2	5e-13	Disease resistance RPP13-like protein 4 OS=Arabidopsis thaliana GN=RPP13L4 PE=2 SV=2	--	--	--	--	--	K13457	1e-08	55.1	rcu:RCOM_0742270	disease resistance protein RPM1	-	GO:0016787//hydrolase activity;GO:0000166//nucleotide binding	-
fd_925	GAAC01000753	1307	194	17.449	gi|224126161|ref|XP_002319770.1|	454	1e-127	cytochrome P450 [Populus trichocarpa] >gi|222858146|gb|EEE95693.1| cytochrome P450 [Populus trichocarpa]	sp|P98188|C94A2_VICSA	253	2e-66	Cytochrome P450 94A2 OS=Vicia sativa GN=CYP94A2 PE=2 SV=1	BH0579	107	4e-23	COG2124	Cytochrome P450	K00517	1e-63	240	ath:AT3G56630	[EC:1.14.-.-]	GO:0006091//generation of precursor metabolites and energy	GO:0016491//oxidoreductase activity;GO:0005506//iron ion binding	GO:0031410//cytoplasmic vesicle
fd_926	GAAC01000754	266	25	11.0485	gi|79344495|ref|NP_172900.2|	52	2e-06	protein binding [Arabidopsis thaliana]	--	--	--	--	--	--	--	--	--	--	--	--	--	--	-	-	-
fd_927	GAAC01000755	411	41	11.727	--	--	--	--	--	--	--	--	--	--	--	--	--	--	--	--	--	--	-	-	-
fd_928	GAAC01000756	1637	231	16.5885	gi|22329893|ref|NP_174433.2|	398	1e-109	SGR2 (SHOOT GRAVITROPISM 2); phospholipase A1 [Arabidopsis thaliana] >gi|16904659|dbj|BAB71959.1| shoot gravitropism 2 [Arabidopsis thaliana]	sp|Q9Y6Y8|S23IP_HUMAN	124	3e-27	SEC23-interacting protein OS=Homo sapiens GN=SEC23IP PE=1 SV=1	--	--	--	--	--	--	--	--	--	--	-	-	-
fd_929	GAAC01000757	240	3	1.4694	gi|225424399|ref|XP_002281366.1|	52.8	1e-06	PREDICTED: hypothetical protein [Vitis vinifera] >gi|297737618|emb|CBI26819.3| unnamed protein product [Vitis vinifera]	--	--	--	--	--	--	--	--	--	--	--	--	--	--	-	-	-
fd_930	GAAC01000758	237	8	3.9681	--	--	--	--	--	--	--	--	--	--	--	--	--	--	--	--	--	--	-	-	-
fd_931	GAAC01000759	2227	408	21.5369	gi|15235410|ref|NP_192994.1|	716	0	UPL5 (UBIQUITIN PROTEIN LIGASE 5); acid-amino acid ligase/ binding / ubiquitin-protein ligase [Arabidopsis thaliana] >gi|75207797|sp|Q9SU29.1|UPL5_ARATH RecName: Full=E3 ubiquitin-protein ligase UPL5; Short=Ubiquitin-protein ligase 5 >gi|5823568|emb|CAB41727.2| polyubiquitin-like protein [Arabidopsis thaliana] >gi|7267959|emb|CAB78300.1| polyubiquitin-like protein [Arabidopsis thaliana] >gi|11073…	sp|Q9SU29|UPL5_ARATH	716	0	E3 ubiquitin-protein ligase UPL5 OS=Arabidopsis thaliana GN=UPL5 PE=2 SV=1	YER125w	170	1e-41	COG5021	Ubiquitin-protein ligase	K10591	0	716	ath:AT4G12570	E3 ubiquitin-protein ligase NEDD4 [EC:6.3.2.19]	GO:0010260//organ senescence;GO:0009719//response to endogenous stimulus;GO:0032446//protein modification by small protein conjugation;GO:0000302//response to reactive oxygen species	GO:0005488//binding;GO:0019787//small conjugating protein ligase activity	GO:0044424//intracellular part
fd_932	GAAC01000760	377	84	26.1928	gi|2352925|gb|AAB69320.1|	251	1e-66	plastidic 3-deoxy-D-arabino-heptulosonate 7-phosphate synthase 2 [Petroselinum crispum]	sp|P27608|AROF_TOBAC	248	8e-66	Phospho-2-dehydro-3-deoxyheptonate aldolase 1, chloroplastic OS=Nicotiana tabacum GN=DHAPS-1 PE=2 SV=1	SMc00155	147	3e-36	COG3200	3-deoxy-D-arabino-heptulosonate 7-phosphate (DAHP) synthase	K01626	2e-66	247	pop:POPTR_559072	3-deoxy-7-phosphoheptulonate synthase [EC:2.5.1.54]	GO:0008652//cellular amino acid biosynthetic process	GO:0016765//transferase activity, transferring alkyl or aryl (other than methyl) groups	GO:0009536//plastid
fd_933	GAAC01000761	290	54	21.8897	gi|15391731|emb|CAA93316.2|	161	2e-39	nitrite transporter [Cucumis sativus]	sp|Q9FNL7|PTR3A_ARATH	86.3	5e-17	Peptide transporter PTR3-A OS=Arabidopsis thaliana GN=PTR3-A PE=2 SV=1	ECU11g1050	48.5	3e-06	COG3104	Dipeptide/tripeptide permease	K03305	2e-20	94	sbi:SORBI_01g009890	proton-dependent oligopeptide transporter, POT family	GO:0015833//peptide transport	-	GO:0031224//intrinsic to membrane
fd_934	GAAC01000762	224	10	5.248	gi|224137802|ref|XP_002322655.1|	118	2e-26	autoinhibited calcium ATPase [Populus trichocarpa] >gi|222867285|gb|EEF04416.1| autoinhibited calcium ATPase [Populus trichocarpa]	sp|O22218|ACA4_ARATH	97.8	2e-20	Calcium-transporting ATPase 4, plasma membrane-type OS=Arabidopsis thaliana GN=ACA4 PE=1 SV=1	--	--	--	--	--	K01537	1e-21	97.8	ath:AT2G41560	Ca2+-transporting ATPase [EC:3.6.3.8]	GO:0009206	GO:0046873//metal ion transmembrane transporter activity;GO:0019829//cation-transporting ATPase activity;GO:0032559//adenyl ribonucleotide binding	GO:0031224//intrinsic to membrane
fd_935	GAAC01000763	286	28	11.5089	--	--	--	--	--	--	--	--	--	--	--	--	--	--	--	--	--	--	-	-	-
fd_936	GAAC01000764	493	49	11.684	--	--	--	--	--	--	--	--	--	--	--	--	--	--	--	--	--	--	-	-	-
fd_937	--	181	5	3.2474	gi|115479423|ref|NP_001063305.1|	87.8	3e-17	Os09g0445700 [Oryza sativa Japonica Group] >gi|113631538|dbj|BAF25219.1| Os09g0445700 [Oryza sativa Japonica Group]	--	--	--	--	--	--	--	--	--	--	--	--	--	--	-	GO:0016462//pyrophosphatase activity;GO:0032559//adenyl ribonucleotide binding	GO:0031410//cytoplasmic vesicle
fd_938	GAAC01000765	242	20	9.7153	gi|217075172|gb|ACJ85946.1|	58.9	2e-08	unknown [Medicago truncatula]	--	--	--	--	--	--	--	--	--	--	--	--	--	--	-	-	-
fd_939	GAAC01000766	654	48	8.6279	--	--	--	--	--	--	--	--	--	--	--	--	--	--	--	--	--	--	-	-	-
fd_940	--	188	89	55.6513	gi|297612785|ref|NP_001066323.2|	100	4e-21	Os12g0182800 [Oryza sativa Japonica Group] >gi|255670110|dbj|BAF29342.2| Os12g0182800 [Oryza sativa Japonica Group]	--	--	--	--	--	--	--	--	--	--	--	--	--	--	-	-	-
fd_941	--	184	14	8.9444	gi|15235367|ref|NP_192153.1|	80.9	4e-15	EID1 (EMPFINDLICHER IM DUNKELROTEN LICHT 1); ubiquitin-protein ligase [Arabidopsis thaliana] >gi|68052208|sp|Q8LEA8.2|EID1_ARATH RecName: Full=Phytochrome A-associated F-box protein; AltName: Full=Empfindlicher im dunkelroten Licht protein 1 >gi|3193286|gb|AAC19270.1| T14P8.22 [Arabidopsis thaliana] >gi|30984562|gb|AAP42744.1| At4g02440 [Arabidopsis thaliana] >gi|110739507|dbj|BAF01662.1| EID1 [A…	sp|Q8LEA8|EID1_ARATH	80.9	2e-15	Phytochrome A-associated F-box protein OS=Arabidopsis thaliana GN=EID1 PE=1 SV=2	--	--	--	--	--	--	--	--	--	--	GO:0009648//photoperiodism;GO:0007602//phototransduction;GO:0048827//phyllome development;GO:0009640//photomorphogenesis	GO:0005488//binding	GO:0043231//intracellular membrane-bounded organelle
fd_942	--	188	5	3.1265	--	--	--	--	--	--	--	--	--	--	--	--	--	--	--	--	--	--	-	-	-
fd_943	GAAC01000767	764	28	4.3083	gi|297817644|ref|XP_002876705.1|	189	4e-47	PWWP domain-containing protein [Arabidopsis lyrata subsp. lyrata] >gi|297322543|gb|EFH52964.1| PWWP domain-containing protein [Arabidopsis lyrata subsp. lyrata]	sp|Q8VHK7|HDGF_RAT	59.7	2e-08	Hepatoma-derived growth factor OS=Rattus norvegicus GN=Hdgf PE=1 SV=2	--	--	--	--	--	--	--	--	--	--	GO:0008152//metabolic process;GO:0006950//response to stress	GO:0004601//peroxidase activity	GO:0031410//cytoplasmic vesicle
fd_944	--	193	25	15.2274	gi|85068684|gb|ABC69422.1|	79.3	1e-14	CYP72A58 [Nicotiana tabacum]	sp|Q05047|C72A1_CATRO	75.5	1e-13	Secologanin synthase OS=Catharanthus roseus GN=CYP72A1 PE=2 SV=1	--	--	--	--	--	K07424	3e-10	60.1	sbi:SORBI_03g028720	cytochrome P450, family 3, subfamily A [EC:1.14.14.1]	GO:0008152//metabolic process	GO:0016491//oxidoreductase activity;GO:0005506//iron ion binding	GO:0043231//intracellular membrane-bounded organelle;GO:0016020//membrane
fd_945	GAAC01000768	335	54	18.9493	gi|224993590|gb|ACN76474.1|	225	1e-58	CBL-interacting protein kinase 24 [Populus euphratica]	sp|Q93VD3|CIPKN_ARATH	224	1e-58	CBL-interacting serine/threonine-protein kinase 23 OS=Arabidopsis thaliana GN=CIPK23 PE=1 SV=1	ECU03g0620	99.8	1e-21	COG0515	Serine/threonine protein kinase	K00924	9e-60	224	ath:AT1G30270	[EC:2.7.1.-]	GO:0031667//response to nutrient levels;GO:0006950//response to stress;GO:0006464//protein modification process	GO:0004674//protein serine/threonine kinase activity;GO:0032559//adenyl ribonucleotide binding	GO:0043231//intracellular membrane-bounded organelle;GO:0044444//cytoplasmic part;GO:0016020//membrane
fd_946	GAAC01000769	942	178	22.2133	gi|115471651|ref|NP_001059424.1|	193	3e-99	Os07g0301200 [Oryza sativa Japonica Group] >gi|75325214|sp|Q6YS30.1|RH5_ORYSJ RecName: Full=DEAD-box ATP-dependent RNA helicase 5 >gi|113610960|dbj|BAF21338.1| Os07g0301200 [Oryza sativa Japonica Group]	sp|Q6YS30|RH5_ORYSJ	193	1e-99	DEAD-box ATP-dependent RNA helicase 5 OS=Oryza sativa subsp. japonica GN=Os07g0301200 PE=2 SV=1	ECU08g1080	114	9e-36	COG0513	Superfamily II DNA and RNA helicases	K12823	2e-41	125	osa:4327330	ATP-dependent RNA helicase DDX5/DBP2 [EC:3.6.4.13]	-	GO:0032559//adenyl ribonucleotide binding;GO:0042623//ATPase activity, coupled	-
fd_947	GAAC01000770	209	5	2.8123	--	--	--	--	--	--	--	--	--	--	--	--	--	--	--	--	--	--	-	-	-
fd_948	--	525	83	18.585	--	--	--	--	--	--	--	--	--	--	--	--	--	--	--	--	--	--	-	-	-
fd_949	GAAC01000771	283	22	9.1386	gi|15222208|ref|NP_172778.1|	123	6e-28	RNA recognition motif (RRM)-containing protein [Arabidopsis thaliana] >gi|4850402|gb|AAD31072.1|AC007357_21 Contains similarity to gb|Y12424 SGRP-1 protein frm Solanum commersonii and contains a PF|00076 RNA rocognition motif [Arabidopsis thaliana] >gi|17064902|gb|AAL32605.1| Unknown protein [Arabidopsis thaliana] >gi|27311939|gb|AAO00935.1| Unknown protein [Arabidopsis thaliana]	--	--	--	--	--	--	--	--	--	--	--	--	--	--	-	GO:0003676//nucleic acid binding	-
fd_950	GAAC01000772	511	53	12.1927	gi|291059157|gb|ADD71922.1|	113	9e-25	BAHD-type acyltransferase [Actaea racemosa]	sp|Q70PR7|VINSY_RAUSE	110	6e-24	Vinorine synthase OS=Rauvolfia serpentina GN=ACT PE=1 SV=2	--	--	--	--	--	K13065	1e-13	72.8	pop:POPTR_554899	shikimate O-hydroxycinnamoyltransferase [EC:2.3.1.133]	-	GO:0016740//transferase activity	-
fd_951	GAAC01000773	3105	769	29.1144	gi|42569848|ref|NP_181714.3|	831	0	cyclin-related [Arabidopsis thaliana]	sp|Q09263|EFR3_CAEEL	96.7	9e-19	Protein EFR3 homolog OS=Caenorhabditis elegans GN=C32D5.3 PE=2 SV=1	--	--	--	--	--	--	--	--	--	--	-	-	-
fd_952	GAAC01000774	478	105	25.8229	gi|186509834|ref|NP_187272.3|	157	6e-38	binding [Arabidopsis thaliana]	--	--	--	--	--	--	--	--	--	--	--	--	--	--	-	-	GO:0044464//cell part
fd_953	--	467	21	5.2862	gi|18076679|emb|CAC84774.1|	107	5e-30	P70 protein [Nicotiana tabacum]	sp|Q9ZQC5|ICR2_ARATH	92.8	2e-21	Interactor of constitutive active ROPs 2, chloroplastic OS=Arabidopsis thaliana GN=ICR2 PE=1 SV=1	--	--	--	--	--	--	--	--	--	--	-	GO:0005515//protein binding	GO:0043231//intracellular membrane-bounded organelle
fd_954	GAAC01000775	209	8	4.4997	gi|297815076|ref|XP_002875421.1|	70.9	4e-12	nodulin MtN21 family protein [Arabidopsis lyrata subsp. lyrata] >gi|297321259|gb|EFH51680.1| nodulin MtN21 family protein [Arabidopsis lyrata subsp. lyrata]	sp|Q6J163|5NG4_PINTA	49.3	7e-06	Auxin-induced protein 5NG4 OS=Pinus taeda PE=2 SV=1	--	--	--	--	--	--	--	--	--	--	-	-	-
fd_955	GAAC01000776	778	61	9.2171	gi|225348625|gb|ACN87274.1|	177	2e-65	short chain dehydrogenase/reductase [Chelidonium majus]	sp|Q9M2E2|SDR1_ARATH	167	3e-56	(+)-neomenthol dehydrogenase OS=Arabidopsis thaliana GN=SDR1 PE=1 SV=1	SA2365	48.5	2e-12	COG1028	Dehydrogenases with different specificities (related to short-chain alcohol dehydrogenases)	--	--	--	--	--	GO:0008152//metabolic process	GO:0003824//catalytic activity	-
fd_956	GAAC01000777	437	32	8.6082	--	--	--	--	--	--	--	--	--	--	--	--	--	--	--	--	--	--	-	-	-
fd_957	GAAC01000778	647	148	26.8906	gi|297797713|ref|XP_002866741.1|	306	1e-82	succinate dehydrogenase 1-1 [Arabidopsis lyrata subsp. lyrata] >gi|297312576|gb|EFH43000.1| succinate dehydrogenase 1-1 [Arabidopsis lyrata subsp. lyrata]	sp|O82663|DHSA1_ARATH	305	1e-82	Succinate dehydrogenase [ubiquinone] flavoprotein subunit 1, mitochondrial OS=Arabidopsis thaliana GN=SDH1-1 PE=1 SV=1	SPAC1556.02c	249	3e-66	COG1053	Succinate dehydrogenase/fumarate reductase, flavoprotein subunit	K00234	2e-88	321	pop:POPTR_219180	succinate dehydrogenase (ubiquinone) flavoprotein subunit [EC:1.3.5.1]	GO:0022904//respiratory electron transport chain;GO:0009060//aerobic respiration	GO:0046914//transition metal ion binding;GO:0000104//succinate dehydrogenase activity;GO:0032559//adenyl ribonucleotide binding	GO:0030312//external encapsulating structure;GO:0005746//mitochondrial respiratory chain
fd_958	GAAC01000779	1499	550	43.1325	gi|134142842|gb|ABO61742.1|	728	0	trehalose-phosphate synthase 1 [Solanum lycopersicum]	sp|Q9SYM4|TPS1_ARATH	687	0	Alpha,alpha-trehalose-phosphate synthase [UDP-forming] 1 OS=Arabidopsis thaliana GN=TPS1 PE=1 SV=1	PAE1272_2	106	1e-22	COG1877	Trehalose-6-phosphatase	K00697	0	726	pop:POPTR_828543	alpha,alpha-trehalose-phosphate synthase (UDP-forming) [EC:2.4.1.15]	GO:0009756//carbohydrate mediated signaling;GO:0005991//trehalose metabolic process;GO:0007275//multicellular organismal development;GO:0042546//cell wall biogenesis;GO:0003006//reproductive developmental process	GO:0035251//UDP-glucosyltransferase activity;GO:0019203//carbohydrate phosphatase activity	-
fd_959	GAAC01000780	248	8	3.7921	gi|186489926|ref|NP_001117459.1|	157	5e-38	TOR (TARGET OF RAPAMYCIN); 1-phosphatidylinositol-3-kinase/ protein binding [Arabidopsis thaliana]	sp|Q86C65|TOR_DICDI	107	2e-23	Target of rapamycin OS=Dictyostelium discoideum GN=tor PE=1 SV=1	SPBC216.07c	101	3e-22	COG5032	Phosphatidylinositol kinase and protein kinases of the PI-3 kinase family	K07203	7e-41	161	vvi:100249713	FKBP12-rapamycin complex-associated protein	GO:0003006//reproductive developmental process	GO:0035004//phosphoinositide 3-kinase activity;GO:0032559//adenyl ribonucleotide binding	-
fd_960	GAAC01000781	266	44	19.4453	gi|224111430|ref|XP_002315852.1|	152	1e-36	type-b response regulator [Populus trichocarpa] >gi|222864892|gb|EEF02023.1| type-b response regulator [Populus trichocarpa]	sp|Q9ZWJ9|ARR2_ARATH	79.3	7e-15	Two-component response regulator ARR2 OS=Arabidopsis thaliana GN=ARR2 PE=1 SV=1	--	--	--	--	--	--	--	--	--	--	GO:0010468//regulation of gene expression;GO:0006351//transcription, DNA-dependent	GO:0004871//signal transducer activity;GO:0003676//nucleic acid binding;GO:0016772//transferase activity, transferring phosphorus-containing groups	GO:0043231//intracellular membrane-bounded organelle
fd_961	GAAC01000782	229	27	13.8603	--	--	--	--	--	--	--	--	--	--	--	--	--	--	--	--	--	--	-	-	-
fd_962	GAAC01000783	303	68	26.3821	gi|30685317|ref|NP_193844.2|	170	5e-42	AAT1 (AMINO ACID TRANSPORTER 1); L-glutamate transmembrane transporter/ L-lysine transmembrane transporter/ arginine transmembrane transporter/ cationic amino acid transmembrane transporter [Arabidopsis thaliana] >gi|30102670|gb|AAP21253.1| At4g21120 [Arabidopsis thaliana] >gi|110743257|dbj|BAE99519.1| amino acid transport protein AAT1 [Arabidopsis thaliana]	sp|Q797A7|YFNA_BACSU	86.7	4e-17	Uncharacterized amino acid permease yfnA OS=Bacillus subtilis GN=yfnA PE=3 SV=1	lin0648	89.7	1e-18	COG0531	Amino acid transporters	K03294	3e-26	113	cre:CHLREDRAFT_206100	basic amino acid/polyamine antiporter, APA family	GO:0015813//L-glutamate transport;GO:0015809//arginine transport	GO:0015174//basic amino acid transmembrane transporter activity;GO:0015172//acidic amino acid transmembrane transporter activity	GO:0031224//intrinsic to membrane
fd_963	GAAC01000784	509	563	130.027	gi|115482620|ref|NP_001064903.1|	119	2e-26	Os10g0486600 [Oryza sativa Japonica Group] >gi|226498606|ref|NP_001148867.1| LOC100282486 [Zea mays] >gi|297725467|ref|NP_001175097.1| Os07g0202450 [Oryza sativa Japonica Group] >gi|113639512|dbj|BAF26817.1| Os10g0486600 [Oryza sativa Japonica Group] >gi|195620258|gb|ACG31959.1| mitosis protein dim1 [Zea mays] >gi|195622740|gb|ACG33200.1| mitosis protein dim1 [Zea mays] >gi|255677591|dbj|BAH93825…	sp|P83877|TXN4A_MOUSE	112	1e-24	Thioredoxin-like protein 4A OS=Mus musculus GN=Txnl4a PE=2 SV=1	--	--	--	--	--	K12859	1e-27	119	zma:100282486	U5 snRNP protein, DIM1 family	GO:0000087//M phase of mitotic cell cycle	-	GO:0043231//intracellular membrane-bounded organelle;GO:0030529//ribonucleoprotein complex
fd_964	GAAC01000785	222	42	22.2402	--	--	--	--	--	--	--	--	--	--	--	--	--	--	--	--	--	--	-	-	-
fd_965	GAAC01000786	296	41	16.283	gi|297822557|ref|XP_002879161.1|	162	1e-39	VHA-A1 [Arabidopsis lyrata subsp. lyrata] >gi|297325000|gb|EFH55420.1| VHA-A1 [Arabidopsis lyrata subsp. lyrata]	sp|Q54E04|VATM_DICDI	88.6	1e-17	Vacuolar proton translocating ATPase 100 kDa subunit OS=Dictyostelium discoideum GN=vatM PE=1 SV=2	YOR270c	58.5	3e-09	COG1269	Archaeal/vacuolar-type H+-ATPase subunit I	K02154	8e-43	168	vvi:100250193	V-type H+-transporting ATPase subunit I [EC:3.6.3.14]	GO:0006754//ATP biosynthetic process	GO:0017111//nucleoside-triphosphatase activity;GO:0015077//monovalent inorganic cation transmembrane transporter activity	GO:0030658;GO:0016469//proton-transporting two-sector ATPase complex
fd_966	GAAC01000787	1721	219	14.9591	gi|15225053|ref|NP_181454.1|	686	0	nodulin family protein [Arabidopsis thaliana] >gi|16930479|gb|AAL31925.1|AF419593_1 At2g39210/T16B24.15 [Arabidopsis thaliana] >gi|3402684|gb|AAC28987.1| nodulin-like protein [Arabidopsis thaliana]	sp|Q6CGU8|MCH1_YARLI	66.6	5e-10	Probable transporter MCH1 OS=Yarrowia lipolytica GN=MCH1 PE=3 SV=1	--	--	--	--	--	--	--	--	--	--	GO:0006810//transport	-	-
fd_967	GAAC01000788	872	157	21.1654	gi|211906438|gb|ACJ11712.1|	294	1e-148	UDP-D-glucose dehydrogenase [Gossypium hirsutum]	sp|Q9LIA8|UGDH1_ARATH	285	2e-144	Probable UDP-glucose 6-dehydrogenase 1 OS=Arabidopsis thaliana GN=UGD1 PE=1 SV=1	AGl1413	132	4e-40	COG1004	Predicted UDP-glucose 6-dehydrogenase	K00012	9e-152	302	vvi:100264653	UDPglucose 6-dehydrogenase [EC:1.1.1.22]	-	-	-
fd_968	GAAC01000789	217	24	13.0015	gi|157283441|gb|ABV30747.1|	100	4e-21	kinase-like protein [Prunus serrulata]	sp|Q3E8W4|ANX2_ARATH	96.3	5e-20	Receptor-like protein kinase ANXUR2 OS=Arabidopsis thaliana GN=ANX2 PE=2 SV=1	--	--	--	--	--	K04733	2e-20	94	ath:AT5G38990	interleukin-1 receptor-associated kinase 4 [EC:2.7.11.1]	GO:0006464//protein modification process	GO:0004871//signal transducer activity;GO:0004672//protein kinase activity;GO:0032559//adenyl ribonucleotide binding	-
fd_969	GAAC01000790	200	1	0.5878	--	--	--	--	--	--	--	--	--	--	--	--	--	--	--	--	--	--	-	-	-
fd_970	GAAC01000791	508	44	10.182	gi|15219567|ref|NP_171880.1|	276	1e-73	MGP (Magpie); nucleic acid binding / protein binding / transcription factor/ zinc ion binding [Arabidopsis thaliana] >gi|75339114|sp|Q9ZWA6.1|MGP_ARATH RecName: Full=Zinc finger protein MAGPIE >gi|30017249|gb|AAP12858.1| At1g03840 [Arabidopsis thaliana]	sp|Q9ZWA6|MGP_ARATH	276	6e-74	Zinc finger protein MAGPIE OS=Arabidopsis thaliana GN=MGP PE=1 SV=1	--	--	--	--	--	K03540	1e-42	168	ath:AT1G25250	ribonuclease P subunit RPR2 [EC:3.1.26.5]	GO:0010468//regulation of gene expression	GO:0046914//transition metal ion binding	GO:0043231//intracellular membrane-bounded organelle
fd_971	GAAC01000792	2281	608	31.3344	gi|33330870|gb|AAQ10678.1|	805	0	type-B response regulator [Catharanthus roseus]	sp|Q940D0|ARR1_ARATH	563	2e-159	Two-component response regulator ARR1 OS=Arabidopsis thaliana GN=ARR1 PE=1 SV=2	hydG	70.9	9e-12	COG2204	Response regulator containing CheY-like receiver, AAA-type ATPase, and DNA-binding domains	K12129	5e-22	103	osa:4332464	pseudo-response regulator 7	GO:0010468//regulation of gene expression;GO:0006350//transcription	-	-
fd_972	GAAC01000793	963	124	15.137	gi|6633813|gb|AAF19672.1|AC009519_6	154	2e-36	F1N19.10 [Arabidopsis thaliana]	--	--	--	--	--	--	--	--	--	--	--	--	--	--	GO:0042221//response to chemical stimulus	-	-
fd_973	--	169	4	2.7824	--	--	--	--	--	--	--	--	--	--	--	--	--	--	--	--	--	--	-	-	-
fd_974	--	177	7	4.6491	gi|33637487|gb|AAQ23899.1|	99.4	1e-20	RSH2 [Nicotiana tabacum]	--	--	--	--	--	--	--	--	--	--	--	--	--	--	GO:0008617//guanosine metabolic process	GO:0016778;GO:0016794	GO:0016020//membrane;GO:0009536//plastid
fd_975	GAAC01000794	579	329	66.7975	gi|164605521|dbj|BAF98587.1|	55.8	3e-07	CM0216.530.nc [Lotus japonicus]	--	--	--	--	--	--	--	--	--	--	--	--	--	--	-	-	-
fd_976	--	183	6	3.8543	gi|224089239|ref|XP_002308662.1|	105	1e-22	rna-dependent RNA polymerase [Populus trichocarpa] >gi|222854638|gb|EEE92185.1| rna-dependent RNA polymerase [Populus trichocarpa]	sp|Q8LHH9|SHL2_ORYSJ	90.9	2e-18	Probable RNA-dependent RNA polymerase SHL2 OS=Oryza sativa subsp. japonica GN=SHL2 PE=2 SV=1	--	--	--	--	--	--	--	--	--	--	GO:0048827//phyllome development;GO:0008037//cell recognition;GO:0048437//floral organ development;GO:0045087//innate immune response;GO:0048438//floral whorl development;GO:0030422//production of siRNA involved in RNA interference;GO:0002252;GO:0035195//gene silencing by miRNA	GO:0005488//binding;GO:0034062//RNA polymerase activity	GO:0043231//intracellular membrane-bounded organelle
fd_977	GAAC01000795	332	12	4.249	gi|82697957|gb|ABB89013.1|	75.9	1e-13	CXE carboxylesterase [Actinidia eriantha]	--	--	--	--	--	--	--	--	--	--	--	--	--	--	-	GO:0016788//hydrolase activity, acting on ester bonds;GO:0004871//signal transducer activity	-
fd_978	--	818	177	25.4368	gi|2190419|emb|CAA73973.1|	75.9	6e-13	dem [Solanum lycopersicum]	sp|Q8S8I2|ULT2_ARATH	58.5	5e-08	Protein ULTRAPETALA 2 OS=Arabidopsis thaliana GN=ULT2 PE=2 SV=1	--	--	--	--	--	--	--	--	--	--	-	-	-
fd_979	GAAC01000796	340	21	7.2608	--	--	--	--	--	--	--	--	--	--	--	--	--	--	--	--	--	--	-	-	-
fd_980	GAAC01000797	268	56	24.5638	--	--	--	--	--	--	--	--	--	--	--	--	--	--	--	--	--	--	-	-	-
fd_981	--	194	60	36.3574	gi|4097579|gb|AAD00116.1|	117	3e-26	NTGP1 [Nicotiana tabacum]	sp|Q9ZRD6|YKT61_ARATH	110	3e-24	VAMP-like protein YKT61 OS=Arabidopsis thaliana GN=YKT61 PE=2 SV=1	YKL196c	53.5	9e-08	COG5143	Synaptobrevin/VAMP-like protein	K08516	2e-28	120	pop:POPTR_561300	synaptobrevin homolog YKT6	GO:0034728;GO:0006810//transport	GO:0003676//nucleic acid binding	GO:0000785//chromatin;GO:0043231//intracellular membrane-bounded organelle;GO:0031224//intrinsic to membrane
fd_982	GAAC01000798	832	75	10.597	gi|225454115|ref|XP_002269352.1|	431	1e-120	PREDICTED: similar to KEA1 (K EFFLUX ANTIPORTER 1); potassium:hydrogen antiporter [Vitis vinifera]	sp|A9MN27|KEFB_SALAR	176	1e-45	Glutathione-regulated potassium-efflux system protein kefB OS=Salmonella arizonae (strain ATCC BAA-731 / CDC346-86 / RSK2980) GN=kefB PE=3 SV=1	PA1207_1	203	3e-52	COG0475	Kef-type K+ transport systems, membrane components	--	--	--	--	--	-	-	-
fd_983	GAAC01000799	347	42	14.2286	gi|162463106|ref|NP_001105703.1|	209	8e-54	phosphoglucomutase, cytoplasmic 1 [Zea mays] >gi|12585309|sp|P93804.2|PGMC1_MAIZE RecName: Full=Phosphoglucomutase, cytoplasmic 1; Short=PGM 1; AltName: Full=Glucose phosphomutase 1 >gi|3294467|gb|AAC50048.1| phosphoglucomutase 1 [Zea mays]	sp|P93804|PGMC1_MAIZE	209	4e-54	Phosphoglucomutase, cytoplasmic 1 OS=Zea mays PE=2 SV=2	AGl1564	107	7e-24	COG0033	Phosphoglucomutase	K01835	1e-54	207	osa:4333895	phosphoglucomutase [EC:5.4.2.2]	GO:0010038//response to metal ion;GO:0019318//hexose metabolic process	GO:0046872//metal ion binding;GO:0016868//intramolecular transferase activity, phosphotransferases	GO:0016020//membrane;GO:0009536//plastid
fd_984	GAAC01000800	301	39	15.2315	gi|124360857|gb|ABN08829.1|	51.6	3e-06	Armadillo [Medicago truncatula]	--	--	--	--	--	--	--	--	--	--	--	--	--	--	-	-	-
fd_985	GAAC01000801	390	43	12.9613	gi|204022234|dbj|BAG71125.1|	58.5	1e-14	glucosyltransferase [Phytolacca americana] >gi|219566996|dbj|BAH05016.1| glucosyltransferase [Phytolacca americana]	sp|Q9M156|HQGT_ARATH	62	1e-09	Probable hydroquinone glucosyltransferase OS=Arabidopsis thaliana GN=At4g01070 PE=1 SV=1	--	--	--	--	--	K08237	7e-15	75.9	pop:POPTR_731288	hydroquinone glucosyltransferase [EC:2.4.1.218]	GO:0006805//xenobiotic metabolic process	GO:0035251//UDP-glucosyltransferase activity	-
fd_986	GAAC01000802	1280	212	19.4701	gi|297832004|ref|XP_002883884.1|	504	1e-142	ATLIP1 [Arabidopsis lyrata subsp. lyrata] >gi|297329724|gb|EFH60143.1| ATLIP1 [Arabidopsis lyrata subsp. lyrata]	sp|Q71DJ5|LIP1_ARATH	501	3e-141	Triacylglycerol lipase 1 OS=Arabidopsis thaliana GN=LIP1 PE=1 SV=1	SPBC14C8.15	128	2e-29	COG0596	Predicted hydrolases or acyltransferases (alpha/beta hydrolase superfamily)	--	--	--	--	--	-	-	-
fd_987	GAAC01000803	553	72	15.3056	gi|256016311|gb|ACU56981.1|	265	2e-70	importin alpha [Citrus sinensis]	sp|Q71VM4|IMA1A_ORYSJ	240	3e-63	Importin subunit alpha-1a OS=Oryza sativa subsp. japonica GN=Os01g0253300 PE=1 SV=2	SPCC962.03c	174	6e-44	COG5064	Karyopherin (importin) alpha	K10590	4e-07	51.2	sbi:SORBI_06g003290	E3 ubiquitin-protein ligase TRIP12 [EC:6.3.2.19]	GO:0051701;GO:0009608//response to symbiont;GO:0006605//protein targeting	GO:0022892	GO:0005635//nuclear envelope
fd_988	--	173	8	5.4361	--	--	--	--	--	--	--	--	--	--	--	--	--	--	--	--	--	--	-	-	-
fd_989	GAAC01000804	277	32	13.5804	--	--	--	--	--	--	--	--	--	--	--	--	--	--	--	--	--	--	-	-	-
fd_990	--	194	10	6.0596	--	--	--	--	--	--	--	--	--	--	--	--	--	--	--	--	--	--	-	-	-
fd_991	GAAC01000805	286	23	9.4538	gi|255537401|ref|XP_002509767.1|	61.6	3e-09	conserved hypothetical protein [Ricinus communis] >gi|223549666|gb|EEF51154.1| conserved hypothetical protein [Ricinus communis]	--	--	--	--	--	--	--	--	--	--	--	--	--	--	-	-	-
fd_992	GAAC01000806	1322	383	34.0573	gi|297844112|ref|XP_002889937.1|	757	0	T12C24.2 [Arabidopsis lyrata subsp. lyrata] >gi|297335779|gb|EFH66196.1| T12C24.2 [Arabidopsis lyrata subsp. lyrata]	sp|P59015|VPS18_DANRE	306	2e-82	Vacuolar protein sorting-associated protein 18 homolog OS=Danio rerio GN=vps18 PE=2 SV=2	--	--	--	--	--	--	--	--	--	--	-	GO:0046914//transition metal ion binding	-
fd_993	GAAC01000807	1383	314	26.6901	gi|6226510|sp|Q9ZSK5.1|ZOG_PHALU	413	1e-114	RecName: Full=Zeatin O-glucosyltransferase; AltName: Full=Trans-zeatin O-beta-D-glucosyltransferase >gi|4140691|gb|AAD04166.1| zeatin O-glucosyltransferase [Phaseolus lunatus]	sp|Q9ZSK5|ZOG_PHALU	413	2e-114	Zeatin O-glucosyltransferase OS=Phaseolus lunatus GN=ZOG1 PE=2 SV=1	BS_yjiC	52.4	2e-06	COG1819	Glycosyl transferases, related to UDP-glucuronosyltransferase	K13495	2e-110	396	pop:POPTR_808453	cis-zeatin O-glucosyltransferase [EC:2.4.1.215]	-	GO:0016740//transferase activity	-
fd_994	GAAC01000808	233	9	4.5408	gi|40644190|emb|CAC95126.1|	103	8e-22	gag-pol polyprotein [Populus deltoides]	sp|P92519|M810_ARATH	65.1	1e-10	Uncharacterized mitochondrial protein AtMg00810 OS=Arabidopsis thaliana GN=AtMg00810 PE=4 SV=1	--	--	--	--	--	--	--	--	--	--	GO:0006259//DNA metabolic process	GO:0003676//nucleic acid binding;GO:0046914//transition metal ion binding;GO:0003824//catalytic activity	GO:0043231//intracellular membrane-bounded organelle
fd_995	GAAC01000809	1720	660	45.1085	gi|10176976|dbj|BAB10208.1|	684	0	mitochondrial RNA helicase-like protein [Arabidopsis thaliana]	sp|Q8IYB8|SUV3_HUMAN	296	4e-79	ATP-dependent RNA helicase SUPV3L1, mitochondrial OS=Homo sapiens GN=SUPV3L1 PE=1 SV=1	CAC0778	165	2e-40	COG0513	Superfamily II DNA and RNA helicases	--	--	--	--	--	-	GO:0003724//RNA helicase activity;GO:0032559//adenyl ribonucleotide binding	GO:0043231//intracellular membrane-bounded organelle
fd_996	--	166	16	11.3307	--	--	--	--	--	--	--	--	--	--	--	--	--	--	--	--	--	--	-	-	-
fd_997	GAAC01000810	271	169	73.3096	gi|224082450|ref|XP_002306697.1|	166	6e-41	f-box family protein [Populus trichocarpa] >gi|222856146|gb|EEE93693.1| f-box family protein [Populus trichocarpa]	sp|Q75HX5|TLP8_ORYSJ	149	7e-36	Tubby-like F-box protein 8 OS=Oryza sativa subsp. japonica GN=TULP8 PE=2 SV=1	--	--	--	--	--	--	--	--	--	--	-	GO:0003824//catalytic activity	-
fd_998	--	190	18	11.1368	gi|19912731|dbj|BAB88648.1|	105	1e-22	microtubule bundling polypeptide TMBP200 [Nicotiana tabacum]	--	--	--	--	--	--	--	--	--	--	--	--	--	--	GO:0000919//cell plate formation;GO:0015031//protein transport	GO:0015631//tubulin binding	GO:0015630//microtubule cytoskeleton;GO:0044444//cytoplasmic part
fd_999	GAAC01000811	548	51	10.9404	gi|75313790|sp|Q9SQV1.1|RH40_ARATH	78.6	4e-14	RecName: Full=DEAD-box ATP-dependent RNA helicase 40	sp|Q9SQV1|RH40_ARATH	78.6	2e-14	DEAD-box ATP-dependent RNA helicase 40 OS=Arabidopsis thaliana GN=RH40 PE=2 SV=1	--	--	--	--	--	--	--	--	--	--	-	GO:0042623//ATPase activity, coupled;GO:0032559//adenyl ribonucleotide binding	GO:0043231//intracellular membrane-bounded organelle
fd_1000	GAAC01000812	665	90	15.9098	gi|158302693|dbj|BAF85832.1|	384	1e-106	alpha-1,2-fucosidase [Lilium longiflorum]	sp|Q8L7W8|FUCO2_ARATH	360	3e-99	Alpha-L-fucosidase 2 OS=Arabidopsis thaliana GN=At4g34260 PE=2 SV=1	--	--	--	--	--	--	--	--	--	--	-	GO:0004560//alpha-L-fucosidase activity	GO:0044464//cell part
fd_1001	GAAC01000813	314	36	13.4777	gi|18407574|ref|NP_564794.1|	147	3e-35	octicosapeptide/Phox/Bem1p (PB1) domain-containing protein / tetratricopeptide repeat (TPR)-containing protein [Arabidopsis thaliana] >gi|7940289|gb|AAF70848.1|AC003113_15 F2401.12 [Arabidopsis thaliana]	sp|Q12118|SGT2_YEAST	50.8	2e-06	Small glutamine-rich tetratricopeptide repeat-containing protein 2 OS=Saccharomyces cerevisiae GN=SGT2 PE=1 SV=1	--	--	--	--	--	--	--	--	--	--	GO:0050896//response to stimulus	-	-
fd_1002	GAAC01000814	280	25	10.496	--	--	--	--	--	--	--	--	--	--	--	--	--	--	--	--	--	--	-	-	-
fd_1003	GAAC01000815	517	37	8.4131	gi|110289326|gb|AAP54423.2|	151	4e-36	KH domain containing protein, expressed [Oryza sativa (japonica cultivar-group)]	sp|P58223|Y4837_ARATH	82	2e-15	KH domain-containing protein At4g18375 OS=Arabidopsis thaliana GN=At4g18375 PE=2 SV=1	--	--	--	--	--	K13210	1e-09	59.3	cre:CHLREDRAFT_182403	far upstream element-binding protein	-	-	-
fd_1004	GAAC01000816	1820	353	22.8006	gi|195423963|gb|ACF96937.1|	909	0	SPINDLY [Sinningia speciosa]	sp|Q8RVB2|SPY_SOLLC	898	0	Probable UDP-N-acetylglucosamine--peptide N-acetylglucosaminyltransferase SPINDLY OS=Solanum lycopersicum GN=SPY PE=2 SV=1	CC0119_2	237	6e-62	COG3914	Predicted O-linked N-acetylglucosamine transferase, SPINDLY family	K09667	2e-46	184	vvi:100244912	polypeptide N-acetylglucosaminyltransferase [EC:2.4.1.-]	GO:0009740//gibberellic acid mediated signaling pathway;GO:0006800//oxygen and reactive oxygen species metabolic process	GO:0005488//binding;GO:0008375//acetylglucosaminyltransferase activity	GO:0043231//intracellular membrane-bounded organelle;GO:0044444//cytoplasmic part
fd_1005	GAAC01000817	596	127	25.0496	gi|224140527|ref|XP_002323634.1|	147	1e-37	cation proton exchanger [Populus trichocarpa] >gi|222868264|gb|EEF05395.1| cation proton exchanger [Populus trichocarpa]	sp|O22920|CHX13_ARATH	126	1e-32	K(+)/H(+) antiporter 13 OS=Arabidopsis thaliana GN=CHX13 PE=1 SV=1	--	--	--	--	--	--	--	--	--	--	GO:0006811//ion transport	GO:0008324//cation transmembrane transporter activity	GO:0044464//cell part
fd_1006	GAAC01000818	266	144	63.6391	gi|168045512|ref|XP_001775221.1|	135	2e-31	SM/Sec1-family protein [Physcomitrella patens subsp. patens] >gi|162673434|gb|EDQ59957.1| SM/Sec1-family protein [Physcomitrella patens subsp. patens]	sp|Q9SL48|SLY1_ARATH	126	5e-29	SEC1 family transport protein SLY1 OS=Arabidopsis thaliana GN=SLY1 PE=1 SV=1	SPCC74.01	73.2	1e-13	COG5158	Proteins involved in synaptic transmission and general secretion, Sec1 family	--	--	--	--	--	GO:0015031//protein transport;GO:0048278//vesicle docking	GO:0022892	GO:0044464//cell part
fd_1007	GAAC01000819	407	37	10.6869	--	--	--	--	--	--	--	--	--	--	--	--	--	--	--	--	--	--	-	-	-
fd_1008	GAAC01000820	429	55	15.0712	--	--	--	--	--	--	--	--	--	--	--	--	--	--	--	--	--	--	-	-	-
fd_1009	GAAC01000821	683	112	19.277	gi|297802710|ref|XP_002869239.1|	301	3e-81	poly(A) polymerase [Arabidopsis lyrata subsp. lyrata] >gi|297315075|gb|EFH45498.1| poly(A) polymerase [Arabidopsis lyrata subsp. lyrata]	sp|Q54J73|PAP_DICDI	179	2e-44	Poly(A) polymerase OS=Dictyostelium discoideum GN=papA PE=3 SV=1	YKR002w	149	4e-36	COG5186	Poly(A) polymerase	K00970	9e-66	246	osa:4328790	poly(A) polymerase [EC:2.7.7.19]	GO:0031123//RNA 3'-end processing	GO:0070566//adenylyltransferase activity;GO:0003676//nucleic acid binding	GO:0043231//intracellular membrane-bounded organelle
fd_1010	--	190	40	24.7485	--	--	--	--	--	--	--	--	--	--	--	--	--	--	--	--	--	--	-	-	-
fd_1011	GAAC01000822	242	76	36.9183	gi|297828964|ref|XP_002882364.1|	105	2e-22	tRNA synthetase class I family protein [Arabidopsis lyrata subsp. lyrata] >gi|297328204|gb|EFH58623.1| tRNA synthetase class I family protein [Arabidopsis lyrata subsp. lyrata]	sp|P23612|SYWC_RABIT	58.5	1e-08	Tryptophanyl-tRNA synthetase, cytoplasmic OS=Oryctolagus cuniculus GN=WARS PE=2 SV=3	ECU11g0530	54.7	4e-08	COG0180	Tryptophanyl-tRNA synthetase	K01867	4e-25	109	pop:POPTR_721365	tryptophanyl-tRNA synthetase [EC:6.1.1.2]	GO:0006418//tRNA aminoacylation for protein translation	GO:0004812//aminoacyl-tRNA ligase activity;GO:0032559//adenyl ribonucleotide binding	GO:0044444//cytoplasmic part
fd_1012	GAAC01000823	204	10	5.7625	gi|297598406|ref|NP_001045527.2|	94	5e-19	Os01g0970600 [Oryza sativa Japonica Group] >gi|255674118|dbj|BAF07441.2| Os01g0970600 [Oryza sativa Japonica Group]	sp|Q0JFN7|RH58_ORYSJ	94	3e-19	DEAD-box ATP-dependent RNA helicase 58, chloroplastic OS=Oryza sativa subsp. japonica GN=Os01g0970600 PE=2 SV=2	--	--	--	--	--	--	--	--	--	--	-	GO:0042623//ATPase activity, coupled;GO:0032559//adenyl ribonucleotide binding	GO:0043231//intracellular membrane-bounded organelle
fd_1013	GAAC01000824	314	28	10.4827	gi|42571181|ref|NP_973664.1|	141	3e-33	POLD2 (DNA POLYMERASE DELTA SMALL SUBUNIT); DNA binding / DNA-directed DNA polymerase [Arabidopsis thaliana] >gi|31376377|gb|AAP49515.1| At2g42120 [Arabidopsis thaliana] >gi|62320658|dbj|BAD95325.1| DNA polymerase delta small subunit like protein [Arabidopsis thaliana]	sp|O48520|DPOD2_ARATH	141	1e-33	DNA polymerase delta small subunit OS=Arabidopsis thaliana GN=POLD2 PE=2 SV=1	YJR006w	71.2	4e-13	COG1311	Archaeal DNA polymerase II, small subunit/DNA polymerase delta, subunit B	K02328	4e-40	159	vvi:100241865	DNA polymerase delta subunit 2	GO:0006259//DNA metabolic process	GO:0003676//nucleic acid binding;GO:0034061	GO:0043231//intracellular membrane-bounded organelle
fd_1014	GAAC01000825	576	53	10.8167	gi|115445065|ref|NP_001046312.1|	176	7e-83	Os02g0219400 [Oryza sativa Japonica Group] >gi|113535843|dbj|BAF08226.1| Os02g0219400 [Oryza sativa Japonica Group]	sp|Q9CXY9|GPI8_MOUSE	130	2e-61	GPI-anchor transamidase OS=Mus musculus GN=Pigk PE=2 SV=2	YDR331w	129	1e-60	COG5206	Glycosylphosphatidylinositol transamidase (GPIT), subunit GPI8	K01369	2e-19	58.5	ppp:PHYPADRAFT_179566	legumain [EC:3.4.22.34]	GO:0019538//protein metabolic process	GO:0004175//endopeptidase activity	GO:0044464//cell part
fd_1015	GAAC01000826	423	86	23.9002	gi|225425912|ref|XP_002267341.1|	125	1e-28	PREDICTED: similar to F21J9.9 [Vitis vinifera]	sp|Q70PR7|VINSY_RAUSE	88.2	1e-17	Vinorine synthase OS=Rauvolfia serpentina GN=ACT PE=1 SV=2	--	--	--	--	--	K13065	6e-08	53.1	pop:POPTR_554899	shikimate O-hydroxycinnamoyltransferase [EC:2.3.1.133]	-	GO:0016747//transferase activity, transferring acyl groups other than amino-acyl groups	-
fd_1016	GAAC01000827	338	25	8.6949	gi|148270940|gb|ABQ53638.1|	113	8e-25	Src homology-3 domain protein 3 [Cucumis melo]	sp|Q15052|ARHG6_HUMAN	53.1	5e-07	Rho guanine nucleotide exchange factor 6 OS=Homo sapiens GN=ARHGEF6 PE=1 SV=2	--	--	--	--	--	K11247	2e-21	97.4	ppp:PHYPADRAFT_120719	endophilin-A	-	-	GO:0043231//intracellular membrane-bounded organelle
fd_1017	GAAC01000828	268	100	43.864	gi|115447363|ref|NP_001047461.1|	52.4	2e-06	Os02g0621500 [Oryza sativa Japonica Group] >gi|113536992|dbj|BAF09375.1| Os02g0621500 [Oryza sativa Japonica Group]	--	--	--	--	--	--	--	--	--	--	--	--	--	--	-	-	-
fd_1018	GAAC01000829	634	116	21.5086	gi|5669656|gb|AAD46413.1|AF096263_1	185	3e-46	ER33 protein [Solanum lycopersicum]	sp|Q9LT67|BH113_ARATH	113	9e-25	Transcription factor bHLH113 OS=Arabidopsis thaliana GN=BHLH113 PE=2 SV=1	--	--	--	--	--	--	--	--	--	--	GO:0010468//regulation of gene expression;GO:0009725//response to hormone stimulus	-	GO:0043231//intracellular membrane-bounded organelle
fd_1019	--	197	10	5.9673	gi|115455861|ref|NP_001051531.1|	112	1e-24	Os03g0793500 [Oryza sativa Japonica Group] >gi|113550002|dbj|BAF13445.1| Os03g0793500 [Oryza sativa Japonica Group]	sp|Q6QNM1|KC1_TOXGO	52.4	9e-07	Casein kinase I OS=Toxoplasma gondii PE=2 SV=1	--	--	--	--	--	K02218	6e-08	52.4	olu:OSTLU_14134	casein kinase 1 [EC:2.7.11.1]	GO:0006464//protein modification process	GO:0004672//protein kinase activity;GO:0032559//adenyl ribonucleotide binding	-
fd_1020	GAAC01000830	251	33	15.4555	gi|151655577|gb|ABS18382.1|	159	7e-39	3-ketoacyl-CoA synthase [Eranthis hyemalis]	sp|Q9LN49|KCS4_ARATH	152	5e-37	3-ketoacyl-CoA synthase 4 OS=Arabidopsis thaliana GN=KCS4 PE=2 SV=1	--	--	--	--	--	--	--	--	--	--	GO:0006633//fatty acid biosynthetic process;GO:0009314//response to radiation;GO:0007275//multicellular organismal development;GO:0006950//response to stress	GO:0016747//transferase activity, transferring acyl groups other than amino-acyl groups	GO:0044464//cell part
fd_1021	--	780	43	6.4806	gi|133907524|gb|ABO42262.1|	200	1e-50	AT-hook DNA-binding protein [Gossypium hirsutum]	--	--	--	--	--	--	--	--	--	--	--	--	--	--	-	GO:0003676//nucleic acid binding	GO:0043231//intracellular membrane-bounded organelle
fd_1022	--	156	4	3.0142	--	--	--	--	--	--	--	--	--	--	--	--	--	--	--	--	--	--	-	-	-
fd_1023	--	186	7	4.4241	gi|112293910|gb|ABI15076.1|	56.6	8e-08	ankyrin-repeat family protein 3 [Arabidopsis thaliana] >gi|112293912|gb|ABI15077.1| ankyrin-repeat family protein 3 [Arabidopsis thaliana] >gi|112293914|gb|ABI15078.1| ankyrin-repeat family protein 3 [Arabidopsis thaliana] >gi|112293916|gb|ABI15079.1| ankyrin-repeat family protein 3 [Arabidopsis thaliana] >gi|112293918|gb|ABI15080.1| ankyrin-repeat family protein 3 [Arabidopsis thaliana] >gi|1122…	--	--	--	--	--	--	--	--	--	--	--	--	--	--	-	-	-
fd_1024	--	3211	694	25.4075	gi|15237413|ref|NP_197180.1|	855	0	DOT2 (DEFECTIVELY ORGANIZED TRIBUTARIES 2) [Arabidopsis thaliana]	sp|Q9Z315|SNUT1_MOUSE	222	2e-56	U4/U6.U5 tri-snRNP-associated protein 1 OS=Mus musculus GN=Sart1 PE=2 SV=1	YLR106c	72.4	5e-12	COG5271	AAA ATPase containing von Willebrand factor type A (vWA) domain	K11984	0	1207	vvi:100266959	U4/U6.U5 tri-snRNP-associated protein 1	GO:0048507//meristem development;GO:0010051//xylem and phloem pattern formation;GO:0048827//phyllome development;GO:0009791//post-embryonic development	-	GO:0031981//nuclear lumen
fd_1025	GAAC01000831	321	17	6.2257	gi|18406426|ref|NP_566005.1|	200	4e-51	mitochondrial transcription termination factor-related / mTERF-related [Arabidopsis thaliana] >gi|3212859|gb|AAC23410.1| expressed protein [Arabidopsis thaliana]	--	--	--	--	--	--	--	--	--	--	--	--	--	--	-	-	GO:0043231//intracellular membrane-bounded organelle
fd_1026	GAAC01000832	335	24	8.4219	--	--	--	--	--	--	--	--	--	--	--	--	--	--	--	--	--	--	-	-	-
fd_1027	GAAC01000833	283	80	33.2313	gi|297843714|ref|XP_002889738.1|	84	5e-16	20S proteasome beta subunit PBG1 [Arabidopsis lyrata subsp. lyrata] >gi|297335580|gb|EFH65997.1| 20S proteasome beta subunit PBG1 [Arabidopsis lyrata subsp. lyrata]	sp|Q7DLR9|PSB4_ARATH	81.6	1e-15	Proteasome subunit beta type-4 OS=Arabidopsis thaliana GN=PBG1 PE=1 SV=2	YFR050c	48.9	2e-06	COG0638	20S proteasome, alpha and beta subunits	K02736	3e-19	89.7	vvi:100263853	20S proteasome subunit beta 7 [EC:3.4.25.1]	GO:0019941//modification-dependent protein catabolic process;GO:0006970//response to osmotic stress;GO:0010038//response to metal ion	GO:0004175//endopeptidase activity	GO:0005840//ribosome;GO:0043231//intracellular membrane-bounded organelle;GO:0000502//proteasome complex
fd_1028	GAAC01000834	367	20	6.4063	gi|302142793|emb|CBI20088.3|	79.3	1e-14	unnamed protein product [Vitis vinifera]	--	--	--	--	--	--	--	--	--	--	--	--	--	--	-	-	-
fd_1029	GAAC01000835	286	40	16.4413	--	--	--	--	--	--	--	--	--	--	--	--	--	--	--	--	--	--	-	-	-
fd_1030	GAAC01000836	263	10	4.4698	gi|239950052|gb|ACS36758.1|	159	7e-39	ATP-dependent phosphofructokinase [Camellia sinensis]	sp|Q8VYN6|K6PF5_ARATH	152	6e-37	6-phosphofructokinase 5, chloroplastic OS=Arabidopsis thaliana GN=PFK5 PE=1 SV=1	TP0108	79.7	1e-15	COG0205	6-phosphofructokinase	K00850	2e-41	163	pop:POPTR_219726	6-phosphofructokinase [EC:2.7.1.11]	GO:0006007//glucose catabolic process	GO:0008443//phosphofructokinase activity;GO:0032559//adenyl ribonucleotide binding	GO:0043234//protein complex;GO:0009536//plastid
fd_1031	GAAC01000837	483	52	12.6561	gi|6137207|gb|AAF04377.1|AF188678_1	158	3e-38	P72 DEAD box protein [Pisum sativum]	sp|Q9LYJ9|RH46_ARATH	164	2e-40	DEAD-box ATP-dependent RNA helicase 46 OS=Arabidopsis thaliana GN=RH46 PE=2 SV=2	ECU08g1080	73.9	1e-13	COG0513	Superfamily II DNA and RNA helicases	K12823	2e-17	85.1	cre:CHLREDRAFT_136376	ATP-dependent RNA helicase DDX5/DBP2 [EC:3.6.4.13]	-	GO:0016887//ATPase activity;GO:0000166//nucleotide binding	-
fd_1032	GAAC01000838	1383	127	10.7951	gi|115483835|ref|NP_001065579.1|	432	1e-120	Os11g0114700 [Oryza sativa Japonica Group] >gi|113644283|dbj|BAF27424.1| Os11g0114700 [Oryza sativa Japonica Group]	--	--	--	--	--	--	--	--	--	--	--	--	--	--	-	-	-
fd_1033	GAAC01000839	203	108	62.5419	--	--	--	--	--	--	--	--	--	--	--	--	--	--	--	--	--	--	-	-	-
fd_1034	GAAC01000840	348	149	50.3327	gi|81074849|gb|ABB55377.1|	144	4e-34	transcription factor NF-Y CCAAT-binding-like protein-like [Solanum tuberosum] >gi|81076282|gb|ABB55391.1| transcription factor NF-Y CCAAT-binding-like protein-like [Solanum tuberosum] >gi|82400142|gb|ABB72810.1| transcription factor NF-Y, CCAAT-binding-like protein [Solanum tuberosum]	sp|Q67XJ2|NFYBA_ARATH	133	4e-31	Nuclear transcription factor Y subunit B-10 OS=Arabidopsis thaliana GN=NFYB10 PE=2 SV=1	YBL021c	90.5	7e-19	COG2036	Histones H3 and H4	--	--	--	--	--	GO:0006351//transcription, DNA-dependent	GO:0003677//DNA binding	GO:0043231//intracellular membrane-bounded organelle
fd_1035	GAAC01000841	205	2	1.1469	gi|1122443|gb|AAC49123.1|	65.1	2e-10	receptor kinase-like protein [Oryza sativa Indica Group] >gi|2586085|gb|AAC80225.1| receptor kinase-like protein [Oryza longistaminata] >gi|94481121|dbj|BAE93933.1| receptor kinase-like protein [Oryza sativa Indica Group] >gi|94481123|dbj|BAE93934.1| receptor kinase-like protein [Oryza sativa Indica Group] >gi|1586408|prf||2203451A receptor kinase-like protein	sp|C0LGP4|Y3475_ARATH	58.2	2e-08	Probable LRR receptor-like serine/threonine-protein kinase At3g47570 OS=Arabidopsis thaliana GN=At3g47570 PE=1 SV=1	--	--	--	--	--	K13428	9e-09	55.1	ath:AT5G20480	LRR receptor-like serine/threonine-protein kinase EFR [EC:2.7.11.1]	GO:0008152//metabolic process	GO:0004672//protein kinase activity;GO:0000166//nucleotide binding	GO:0016020//membrane
fd_1036	GAAC01000842	262	11	4.9355	gi|124360700|gb|ABN08689.1|	150	3e-36	Aminoacyl-tRNA synthetase, class Ia [Medicago truncatula]	sp|Q8BMJ2|SYLC_MOUSE	113	4e-25	Leucyl-tRNA synthetase, cytoplasmic OS=Mus musculus GN=Lars PE=2 SV=2	SPAC26F1.13c	108	2e-24	COG0495	Leucyl-tRNA synthetase	K01869	3e-40	159	pop:POPTR_596759	leucyl-tRNA synthetase [EC:6.1.1.4]	GO:0006418//tRNA aminoacylation for protein translation	GO:0004812//aminoacyl-tRNA ligase activity;GO:0032559//adenyl ribonucleotide binding	GO:0044424//intracellular part
fd_1037	GAAC01000843	229	134	68.788	gi|77553169|gb|ABA95965.1|	112	2e-24	expressed protein [Oryza sativa (japonica cultivar-group)]	--	--	--	--	--	--	--	--	--	--	--	--	--	--	-	-	-
fd_1038	GAAC01000844	2061	405	23.1004	gi|291481091|gb|ADE06657.1|	125	3e-27	eukaryotic translation initiation factor 4g [Oryza sativa Indica Group] >gi|291481093|gb|ADE06658.1| eukaryotic translation initiation factor 4g [Oryza sativa Indica Group]	sp|Q76E23|IF4G1_ARATH	88.2	2e-16	Eukaryotic translation initiation factor 4G OS=Arabidopsis thaliana GN=EIF4G PE=1 SV=1	--	--	--	--	--	K03260	7e-59	225	vvi:100261523	translation initiation factor eIF-4F	-	-	-
fd_1039	GAAC01000845	840	389	54.4394	gi|15239022|ref|NP_196694.1|	197	1e-49	monooxygenase family protein [Arabidopsis thaliana] >gi|28950969|gb|AAO63408.1| At5g11330 [Arabidopsis thaliana]	--	--	--	--	SA2099	55.1	1e-07	COG0654	2-polyprenyl-6-methoxyphenol hydroxylase and related FAD-dependent oxidoreductases	--	--	--	--	--	GO:0008152//metabolic process	GO:0016491//oxidoreductase activity	GO:0031410//cytoplasmic vesicle
fd_1040	GAAC01000846	240	2	0.9796	gi|224135541|ref|XP_002322099.1|	50.1	8e-06	predicted protein [Populus trichocarpa] >gi|222869095|gb|EEF06226.1| predicted protein [Populus trichocarpa]	--	--	--	--	--	--	--	--	--	--	--	--	--	--	-	-	-
fd_1041	GAAC01000847	225	9	4.7022	--	--	--	--	--	--	--	--	--	--	--	--	--	--	--	--	--	--	-	-	-
fd_1042	GAAC01000848	216	11	5.9866	--	--	--	--	--	--	--	--	--	--	--	--	--	--	--	--	--	--	-	-	-
fd_1043	GAAC01000849	1656	275	19.5216	gi|297843100|ref|XP_002889431.1|	725	0	phototropic-responsive NPH3 family protein [Arabidopsis lyrata subsp. lyrata] >gi|297335273|gb|EFH65690.1| phototropic-responsive NPH3 family protein [Arabidopsis lyrata subsp. lyrata]	sp|Q9FKB6|Y5880_ARATH	411	8e-114	BTB/POZ domain-containing protein At5g48800 OS=Arabidopsis thaliana GN=At5g48800 PE=1 SV=1	--	--	--	--	--	--	--	--	--	--	GO:0009314//response to radiation;GO:0000904//cell morphogenesis involved in differentiation	GO:0060089//molecular transducer activity;GO:0046914//transition metal ion binding	GO:0016020//membrane
fd_1044	--	185	7	4.448	gi|212717127|gb|ACJ37405.1|	105	1e-22	receptor-like protein kinase [Glycine max]	sp|C0LGG7|Y1534_ARATH	100	2e-21	Probable LRR receptor-like serine/threonine-protein kinase At1g53420 OS=Arabidopsis thaliana GN=At1g53420 PE=2 SV=2	lin1934_1	51.2	5e-07	COG0515	Serine/threonine protein kinase	K00558	9e-17	81.6	osa:4332128	DNA (cytosine-5-)-methyltransferase [EC:2.1.1.37]	GO:0006464//protein modification process	GO:0004702//receptor signaling protein serine/threonine kinase activity;GO:0016628//oxidoreductase activity, acting on the CH-CH group of donors, NAD or NADP as acceptor;GO:0032559//adenyl ribonucleotide binding	-
fd_1045	GAAC01000850	349	84	28.2942	gi|255545906|ref|XP_002514013.1|	65.1	2e-10	transcription factor, putative [Ricinus communis] >gi|223547099|gb|EEF48596.1| transcription factor, putative [Ricinus communis]	--	--	--	--	--	--	--	--	--	--	--	--	--	--	GO:0010468//regulation of gene expression	-	GO:0043231//intracellular membrane-bounded organelle
fd_1046	GAAC01000851	220	5	2.6717	--	--	--	--	--	--	--	--	--	--	--	--	--	--	--	--	--	--	-	-	-
fd_1047	GAAC01000852	427	48	13.2147	gi|113208238|dbj|BAF03523.1|	216	5e-56	CGS1 mRNA stability 1 [Arabidopsis thaliana]	sp|Q8T126|FNKC_DICDI	50.1	4e-06	Probable inactive serine/threonine-protein kinase fnkC OS=Dictyostelium discoideum GN=fnkC PE=3 SV=1	--	--	--	--	--	--	--	--	--	--	GO:0008152//metabolic process	-	GO:0043231//intracellular membrane-bounded organelle
fd_1048	GAAC01000853	297	12	4.7497	--	--	--	--	--	--	--	--	--	--	--	--	--	--	--	--	--	--	-	-	-
fd_1049	GAAC01000854	455	21	5.4256	gi|224138292|ref|XP_002326566.1|	170	6e-42	nbs-lrr resistance protein [Populus trichocarpa] >gi|222833888|gb|EEE72365.1| nbs-lrr resistance protein [Populus trichocarpa]	sp|Q39214|RPM1_ARATH	88.2	2e-17	Disease resistance protein RPM1 OS=Arabidopsis thaliana GN=RPM1 PE=1 SV=1	alr0124_1	53.1	2e-07	COG4886	Leucine-rich repeat (LRR) protein	K13457	2e-23	104	vvi:100252764	disease resistance protein RPM1	-	GO:0016787//hydrolase activity;GO:0000166//nucleotide binding	-
fd_1050	GAAC01000855	203	13	7.5282	gi|297597100|ref|NP_001043445.2|	69.3	1e-11	Os01g0589700 [Oryza sativa Japonica Group] >gi|255673408|dbj|BAF05359.2| Os01g0589700 [Oryza sativa Japonica Group]	--	--	--	--	--	--	--	--	--	--	--	--	--	--	-	-	-
fd_1051	GAAC01000856	291	52	21.0065	gi|157488004|gb|ABV57768.1|	181	3e-45	serine C-palmitoyltransferase [Gossypium hirsutum]	sp|O35704|SPTC1_MOUSE	96.3	5e-20	Serine palmitoyltransferase 1 OS=Mus musculus GN=Sptlc1 PE=2 SV=1	SPBC18E5.02c	75.1	3e-14	COG0156	7-keto-8-aminopelargonate synthetase and related enzymes	K00654	1e-47	184	vvi:100254626	serine palmitoyltransferase [EC:2.3.1.50]	GO:0008152//metabolic process	GO:0016454;GO:0048037//cofactor binding	GO:0031410//cytoplasmic vesicle
fd_1052	GAAC01000857	229	33	16.9403	gi|30679238|ref|NP_192175.2|	146	8e-35	WD-40 repeat family protein / beige-related [Arabidopsis thaliana]	sp|Q55DM1|LVSA_DICDI	100	3e-21	BEACH domain-containing protein lvsA OS=Dictyostelium discoideum GN=lvsA PE=4 SV=2	--	--	--	--	--	--	--	--	--	--	-	GO:0046914//transition metal ion binding	-
fd_1053	GAAC01000858	281	88	36.8146	gi|18405755|ref|NP_564716.1|	70.9	4e-12	CwfJ-like family protein [Arabidopsis thaliana]	--	--	--	--	--	--	--	--	--	--	--	--	--	--	-	-	-
fd_1054	GAAC01000859	260	22	9.947	gi|79323163|ref|NP_001031428.1|	136	8e-32	FRS3 (FAR1-related sequence 3); zinc ion binding [Arabidopsis thaliana] >gi|222424126|dbj|BAH20022.1| AT2G27110 [Arabidopsis thaliana]	sp|Q9ZVC9|FRS3_ARATH	136	5e-32	Protein FAR1-RELATED SEQUENCE 3 OS=Arabidopsis thaliana GN=FRS3 PE=2 SV=2	--	--	--	--	--	--	--	--	--	--	GO:0006260//DNA replication;GO:0009416//response to light stimulus	GO:0046914//transition metal ion binding;GO:0003676//nucleic acid binding;GO:0034061	-
fd_1055	GAAC01000860	273	23	9.9039	gi|225424570|ref|XP_002282089.1|	150	3e-36	PREDICTED: similar to oxysterol-binding family protein [Vitis vinifera]	--	--	--	--	--	--	--	--	--	--	--	--	--	--	GO:0006629//lipid metabolic process	GO:0005543//phospholipid binding;GO:0032934//sterol binding	-
fd_1056	GAAC01000861	241	20	9.7556	--	--	--	--	--	--	--	--	--	--	--	--	--	--	--	--	--	--	-	-	-
fd_1057	GAAC01000862	704	50	8.3491	gi|224059590|ref|XP_002299922.1|	127	1e-31	cc-nbs-lrr resistance protein [Populus trichocarpa] >gi|222847180|gb|EEE84727.1| cc-nbs-lrr resistance protein [Populus trichocarpa]	sp|Q9LRR4|R13L1_ARATH	97.8	2e-20	Putative disease resistance RPP13-like protein 1 OS=Arabidopsis thaliana GN=RPPL1 PE=2 SV=1	--	--	--	--	--	--	--	--	--	--	-	-	-
fd_1058	GAAC01000863	383	57	17.4952	gi|297803826|ref|XP_002869797.1|	120	6e-27	mitochondrial dihydroorotase [Arabidopsis lyrata subsp. lyrata] >gi|297315633|gb|EFH46056.1| mitochondrial dihydroorotase [Arabidopsis lyrata subsp. lyrata]	sp|O04904|PYRC_ARATH	119	6e-27	Dihydroorotase, mitochondrial OS=Arabidopsis thaliana GN=PYR4 PE=2 SV=1	RSc0487	93.6	8e-20	COG0418	Dihydroorotase	K01465	1e-31	131	rcu:RCOM_1173930	dihydroorotase [EC:3.5.2.3]	GO:0006220//pyrimidine nucleotide metabolic process;GO:0006206//pyrimidine base metabolic process	GO:0046914//transition metal ion binding;GO:0016812//hydrolase activity, acting on carbon-nitrogen (but not peptide) bonds, in cyclic amides	GO:0009536//plastid
fd_1059	GAAC01000864	229	5	2.5667	--	--	--	--	--	--	--	--	--	--	--	--	--	--	--	--	--	--	-	-	-
fd_1060	GAAC01000865	495	130	30.8732	gi|95020358|gb|ABF50704.1|	255	3e-75	neutral invertase [Populus sp. UG-2006]	--	--	--	--	--	--	--	--	--	--	--	--	--	--	-	-	GO:0043231//intracellular membrane-bounded organelle
fd_1061	GAAC01000866	416	101	28.5411	gi|297829060|ref|XP_002882412.1|	85.9	1e-16	acyl-CoA binding protein 4, acyl-CoA-binding domain 4 [Arabidopsis lyrata subsp. lyrata] >gi|297328252|gb|EFH58671.1| acyl-CoA binding protein 4, acyl-CoA-binding domain 4 [Arabidopsis lyrata subsp. lyrata]	sp|Q9MA55|ACBP4_ARATH	84.3	2e-16	Acyl-CoA-binding domain-containing protein 4 OS=Arabidopsis thaliana GN=ACBP4 PE=1 SV=1	--	--	--	--	--	--	--	--	--	--	GO:0009725//response to hormone stimulus;GO:0009314//response to radiation;GO:0006810//transport	GO:0005504//fatty acid binding	GO:0043231//intracellular membrane-bounded organelle;GO:0044444//cytoplasmic part
fd_1062	GAAC01000867	621	129	24.4198	gi|42572659|ref|NP_974425.1|	320	8e-87	AFC1 (ARABIDOPSIS FUS3-COMPLEMENTING GENE 1); ATP binding / kinase/ protein kinase/ protein serine/threonine kinase [Arabidopsis thaliana]	sp|P51566|AFC1_ARATH	320	4e-87	Serine/threonine-protein kinase AFC1 OS=Arabidopsis thaliana GN=AFC1 PE=2 SV=2	YBL016w	53.9	2e-07	COG0515	Serine/threonine protein kinase	K08823	6e-90	326	vvi:100251648	CDC-like kinase [EC:2.7.12.1]	GO:0010468//regulation of gene expression;GO:0006464//protein modification process	GO:0004672//protein kinase activity;GO:0032559//adenyl ribonucleotide binding	-
fd_1063	--	150	94	73.6682	gi|62318663|dbj|BAD95148.1|	85.1	2e-16	60S ribosomal protein L7A [Arabidopsis thaliana]	sp|Q9LZH9|RL7A2_ARATH	85.1	1e-16	60S ribosomal protein L7a-2 OS=Arabidopsis thaliana GN=RPL7AB PE=2 SV=1	YLL045c	47	9e-06	COG1358	Ribosomal protein HS6-type (S12/L30/L7a)	K02936	8e-18	85.1	ath:AT3G62870	large subunit ribosomal protein L7Ae	GO:0010467//gene expression;GO:0022613	GO:0046914//transition metal ion binding	GO:0015934//large ribosomal subunit;GO:0016020//membrane;GO:0009536//plastid;GO:0031981//nuclear lumen
fd_1064	--	182	54	34.8791	gi|226529644|ref|NP_001147940.1|	104	3e-22	serine palmitoyltransferase 1 [Zea mays] >gi|195614728|gb|ACG29194.1| serine palmitoyltransferase 1 [Zea mays]	sp|Q55FL5|SPTC1_DICDI	76.3	5e-14	Serine palmitoyltransferase 1 OS=Dictyostelium discoideum GN=sptA PE=3 SV=1	SPBC18E5.02c	64.3	5e-11	COG0156	7-keto-8-aminopelargonate synthetase and related enzymes	K00654	1e-23	104	zma:100281549	serine palmitoyltransferase [EC:2.3.1.50]	GO:0008152//metabolic process	GO:0016454;GO:0048037//cofactor binding	GO:0031410//cytoplasmic vesicle
fd_1065	GAAC01000868	283	109	45.2776	gi|148299083|gb|ABQ58079.1|	163	6e-40	subtilisin-like protease [Nicotiana tabacum]	sp|O65351|SUBL_ARATH	152	8e-37	Subtilisin-like protease OS=Arabidopsis thaliana GN=ARA12 PE=1 SV=1	--	--	--	--	--	K01342	1e-34	141	osa:4334194	subtilisin [EC:3.4.21.62]	GO:0019538//protein metabolic process;GO:0010191;GO:0003006//reproductive developmental process;GO:0044092;GO:0009845//seed germination	GO:0004175//endopeptidase activity;GO:0005515//protein binding	GO:0005618//cell wall;GO:0005576//extracellular region;GO:0031410//cytoplasmic vesicle
fd_1066	GAAC01000869	346	81	27.5202	gi|115477529|ref|NP_001062360.1|	169	9e-42	Os08g0536000 [Oryza sativa Japonica Group] >gi|113624329|dbj|BAF24274.1| Os08g0536000 [Oryza sativa Japonica Group]	sp|P52904|ODPB_PEA	152	6e-37	Pyruvate dehydrogenase E1 component subunit beta, mitochondrial OS=Pisum sativum PE=2 SV=1	SMc01031_2	101	3e-22	COG0022	Pyruvate/2-oxoglutarate dehydrogenase complex, dehydrogenase (E1) component, eukaryotic type, beta subunit	K00162	3e-43	169	osa:4346159	pyruvate dehydrogenase E1 component subunit beta [EC:1.2.4.1]	GO:0006007//glucose catabolic process	GO:0016616//oxidoreductase activity, acting on the CH-OH group of donors, NAD or NADP as acceptor;GO:0048037//cofactor binding;GO:0004738//pyruvate dehydrogenase activity;GO:0000166//nucleotide binding	GO:0043231//intracellular membrane-bounded organelle
fd_1067	GAAC01000870	702	146	24.4489	gi|229609809|gb|ACQ83520.1|	357	1e-97	CBL-interacting protein kinase 04 [Vitis vinifera]	sp|Q93VD3|CIPKN_ARATH	335	2e-91	CBL-interacting serine/threonine-protein kinase 23 OS=Arabidopsis thaliana GN=CIPK23 PE=1 SV=1	--	--	--	--	--	K00924	2e-92	335	ath:AT1G30270	[EC:2.7.1.-]	GO:0031667//response to nutrient levels;GO:0006950//response to stress;GO:0006464//protein modification process	GO:0004674//protein serine/threonine kinase activity;GO:0032559//adenyl ribonucleotide binding	GO:0043231//intracellular membrane-bounded organelle;GO:0044444//cytoplasmic part;GO:0016020//membrane
fd_1068	--	170	310	214.366	--	--	--	--	--	--	--	--	--	--	--	--	--	--	--	--	--	--	-	-	-
fd_1069	GAAC01000871	301	45	17.5748	gi|40287472|gb|AAR83850.1|	73.2	9e-13	hyom protein [Capsicum annuum]	sp|Q9M2F1|RS272_ARATH	70.5	3e-12	40S ribosomal protein S27-2 OS=Arabidopsis thaliana GN=RPS27B PE=2 SV=2	SPBC1685.10	58.9	2e-09	COG2051	Ribosomal protein S27E	K02978	3e-14	73.2	vvi:100248991	small subunit ribosomal protein S27e	-	-	-
fd_1070	GAAC01000872	663	215	38.1213	gi|7248359|dbj|BAA92697.1|	174	2e-73	type 2A protein phosphatase-1 [Vicia faba]	sp|Q9ZSE4|PP2A_HEVBR	167	3e-72	Serine/threonine-protein phosphatase PP2A catalytic subunit OS=Hevea brasiliensis GN=PP2A PE=2 SV=1	SPBC16H5.07c	122	9e-56	COG0639	Diadenosine tetraphosphatase and related serine/threonine protein phosphatases	K04382	1e-73	168	pop:POPTR_824629	protein phosphatase 2 (formerly 2A), catalytic subunit [EC:3.1.3.16]	-	GO:0004721//phosphoprotein phosphatase activity;GO:0043169//cation binding	GO:0016020//membrane;GO:0043231//intracellular membrane-bounded organelle
fd_1071	GAAC01000873	381	26	8.0222	--	--	--	--	--	--	--	--	--	--	--	--	--	--	--	--	--	--	-	-	-
fd_1072	GAAC01000874	253	7	3.2525	--	--	--	--	--	--	--	--	--	--	--	--	--	--	--	--	--	--	-	-	-
fd_1073	--	150	8	6.2696	gi|195651203|gb|ACG45069.1|	109	8e-24	3-isopropylmalate dehydratase large subunit 2 [Zea mays]	sp|Q94AR8|LEUC_ARATH	105	9e-23	3-isopropylmalate dehydratase OS=Arabidopsis thaliana GN=IIL1 PE=2 SV=1	--	--	--	--	--	K01703	1e-25	111	sbi:SORBI_04g002120	3-isopropylmalate/(R)-2-methylmalate dehydratase large subunit [EC:4.2.1.33 4.2.1.35]	GO:0010038//response to metal ion;GO:0006520//cellular amino acid metabolic process;GO:0019758	GO:0051536//iron-sulfur cluster binding;GO:0016866//intramolecular transferase activity;GO:0016836//hydro-lyase activity	GO:0009532//plastid stroma
fd_1074	GAAC01000875	257	22	10.0631	gi|1708025|sp|P52425.1|GPDA_CUPLA	157	3e-38	RecName: Full=Glycerol-3-phosphate dehydrogenase [NAD+] >gi|840731|emb|CAA56125.1| glycerol-3-phosphate dehydrogenase (NAD+) [Cuphea lanceolata]	sp|P52425|GPDA_CUPLA	157	1e-38	Glycerol-3-phosphate dehydrogenase [NAD+] OS=Cuphea lanceolata GN=GPDH PE=2 SV=1	SPAC23D3.04c	90.5	7e-19	COG0240	Glycerol-3-phosphate dehydrogenase	K00006	2e-41	163	vvi:100261224	glycerol-3-phosphate dehydrogenase (NAD+) [EC:1.1.1.8]	GO:0006072//glycerol-3-phosphate metabolic process	GO:0042802//identical protein binding;GO:0016616//oxidoreductase activity, acting on the CH-OH group of donors, NAD or NADP as acceptor;GO:0048037//cofactor binding;GO:0000166//nucleotide binding	GO:0043234//protein complex;GO:0009536//plastid
fd_1075	GAAC01000876	647	101	18.351	gi|296090597|emb|CBI40966.3|	56.6	2e-07	unnamed protein product [Vitis vinifera]	--	--	--	--	--	--	--	--	--	--	--	--	--	--	GO:0006952//defense response;GO:0009987//cellular process	GO:0000166//nucleotide binding	-
fd_1076	GAAC01000877	634	54	10.0126	gi|115482404|ref|NP_001064795.1|	148	4e-56	Os10g0464500 [Oryza sativa Japonica Group] >gi|110289213|gb|AAP54178.2| von Willebrand factor type A domain containing protein, expressed [Oryza sativa (japonica cultivar-group)] >gi|113639404|dbj|BAF26709.1| Os10g0464500 [Oryza sativa Japonica Group]	--	--	--	--	alr4359	43.1	6e-07	COG2304	Uncharacterized protein containing a von Willebrand factor type A (vWA) domain	--	--	--	--	--	GO:0006464//protein modification process	GO:0046914//transition metal ion binding;GO:0004672//protein kinase activity;GO:0032559//adenyl ribonucleotide binding	GO:0016020//membrane
fd_1077	GAAC01000878	1012	450	52.2727	gi|225444543|ref|XP_002275664.1|	412	1e-114	PREDICTED: similar to glycoside hydrolase family 47 protein [Vitis vinifera]	sp|Q9UKM7|MA1B1_HUMAN	226	1e-58	Endoplasmic reticulum mannosyl-oligosaccharide 1,2-alpha-mannosidase OS=Homo sapiens GN=MAN1B1 PE=1 SV=2	--	--	--	--	--	K01230	3e-111	398	ath:AT1G30000	mannosyl-oligosaccharide alpha-1,2-mannosidase [EC:3.2.1.113]	-	GO:0046872//metal ion binding;GO:0015924	GO:0044464//cell part
fd_1078	GAAC01000879	530	44	9.7593	gi|16648987|gb|AAL24345.1|	249	2e-65	Unknown protein [Arabidopsis thaliana] >gi|28059051|gb|AAO29982.1| Unknown protein [Arabidopsis thaliana]	sp|Q9H330|CI005_HUMAN	74.7	3e-13	Transmembrane protein C9orf5 OS=Homo sapiens GN=C9orf5 PE=1 SV=2	--	--	--	--	--	--	--	--	--	--	-	-	GO:0043231//intracellular membrane-bounded organelle
fd_1079	GAAC01000880	597	72	14.1776	gi|224102357|ref|XP_002312648.1|	168	5e-52	type-b response regulator [Populus trichocarpa] >gi|222852468|gb|EEE90015.1| type-b response regulator [Populus trichocarpa]	sp|Q9FXD6|ARR11_ARATH	88.6	2e-27	Two-component response regulator ARR11 OS=Arabidopsis thaliana GN=ARR11 PE=1 SV=1	--	--	--	--	--	--	--	--	--	--	GO:0009725//response to hormone stimulus;GO:0010468//regulation of gene expression;GO:0006351//transcription, DNA-dependent	GO:0003676//nucleic acid binding;GO:0004871//signal transducer activity	GO:0043231//intracellular membrane-bounded organelle
fd_1080	GAAC01000881	205	17	9.7485	--	--	--	--	--	--	--	--	--	--	--	--	--	--	--	--	--	--	-	-	-
fd_1081	GAAC01000882	346	12	4.0771	--	--	--	--	--	--	--	--	--	--	--	--	--	--	--	--	--	--	-	-	-
fd_1082	GAAC01000883	429	190	52.0642	gi|32492578|gb|AAP85377.1|	225	1e-58	RNA binding protein Rp120 [Oryza sativa Japonica Group] >gi|32966012|gb|AAP85378.1| RNA binding protein Rp120 [Oryza sativa Japonica Group]	sp|Q9BXT4|TDRD1_HUMAN	49.7	6e-06	Tudor domain-containing protein 1 OS=Homo sapiens GN=TDRD1 PE=1 SV=2	--	--	--	--	--	--	--	--	--	--	GO:0035194//posttranscriptional gene silencing by RNA	GO:0005488//binding;GO:0016787//hydrolase activity	GO:0031332
fd_1083	GAAC01000884	331	13	4.617	--	--	--	--	--	--	--	--	--	--	--	--	--	--	--	--	--	--	-	-	-
fd_1084	GAAC01000885	1254	277	25.9672	gi|224100259|ref|XP_002311805.1|	114	2e-24	chromatin remodeling complex subunit [Populus trichocarpa] >gi|222851625|gb|EEE89172.1| chromatin remodeling complex subunit [Populus trichocarpa]	sp|Q5SSM3|RICH2_MOUSE	56.2	5e-07	Rho GTPase-activating protein RICH2 OS=Mus musculus GN=Rich2 PE=2 SV=1	--	--	--	--	--	--	--	--	--	--	-	-	-
fd_1085	GAAC01000886	296	7	2.78	gi|240255752|ref|NP_192401.5|	97.4	4e-20	SFR6 (SENSITIVE TO FREEZING 6) [Arabidopsis thaliana]	--	--	--	--	--	--	--	--	--	--	--	--	--	--	-	-	GO:0043231//intracellular membrane-bounded organelle
fd_1086	--	199	20	11.8146	gi|12539609|gb|AAG59584.1|AF229926_1	113	8e-25	pathogen-inducible alpha-dioxygenase [Nicotiana attenuata]	--	--	--	--	--	--	--	--	--	K10529	1e-21	97.8	osa:4352160	alpha-dioxygenase [EC:1.-.-.-]	GO:0008152//metabolic process;GO:0006950//response to stress	GO:0016705//oxidoreductase activity, acting on paired donors, with incorporation or reduction of molecular oxygen;GO:0005506//iron ion binding;GO:0016209//antioxidant activity;GO:0050664//oxidoreductase activity, acting on NADH or NADPH, with oxygen as acceptor;GO:0016701//oxidoreductase activity, acting on single donors with incorporation of molecular oxygen	-
fd_1087	GAAC01000887	313	76	28.5438	--	--	--	--	--	--	--	--	--	--	--	--	--	--	--	--	--	--	-	-	-
fd_1088	--	188	7	4.3771	gi|297840517|ref|XP_002888140.1|	64.3	4e-10	dynamin family protein [Arabidopsis lyrata subsp. lyrata] >gi|297333981|gb|EFH64399.1| dynamin family protein [Arabidopsis lyrata subsp. lyrata]	--	--	--	--	--	--	--	--	--	--	--	--	--	--	-	GO:0000166//nucleotide binding	-
fd_1089	GAAC01000888	289	13	5.288	gi|225447947|ref|XP_002268972.1|	154	2e-37	PREDICTED: similar to EBS1 (EMS-MUTAGENIZED BRI1 SUPPRESSOR 1); UDP-glucose:glycoprotein glucosyltransferase/ transferase, transferring glycosyl groups / transferase, transferring hexosyl groups [Vitis vinifera]	sp|Q8T191|UGGG_DICDI	55.5	1e-07	Probable UDP-glucose:glycoprotein glucosyltransferase A OS=Dictyostelium discoideum GN=ggtA PE=1 SV=2	--	--	--	--	--	K11718	9e-39	154	vvi:100256709	UDP-glucose:glycoprotein glucosyltransferase [EC:2.4.1.-]	GO:0033554//cellular response to stress;GO:0009812//flavonoid metabolic process;GO:0005975//carbohydrate metabolic process;GO:0002218//activation of innate immune response;GO:0010033//response to organic substance;GO:0006464//protein modification process	GO:0035251//UDP-glucosyltransferase activity	GO:0043231//intracellular membrane-bounded organelle
fd_1090	GAAC01000889	1249	232	21.8358	gi|271278821|emb|CAY85529.1|	645	0	Cop11 protein [Carica papaya]	sp|P45432|CSN1_ARATH	583	6e-166	COP9 signalosome complex subunit 1 OS=Arabidopsis thaliana GN=CSN1 PE=1 SV=2	YPR108w	67.8	4e-11	COG5187	26S proteasome regulatory complex component, contains PCI domain	K12175	0	645	vvi:100250638	COP9 signalosome complex subunit 1	-	-	-
fd_1091	GAAC01000890	771	171	26.0726	gi|111038269|gb|ABH03531.1|	195	1e-50	class II knotted-like homeobox protein [Prunus persica] >gi|215983122|gb|ACJ71731.1| class II knotted-like homeobox transcription factor [Prunus persica]	sp|O04136|KNAP3_MALDO	195	2e-49	Homeobox protein knotted-1-like 3 OS=Malus domestica PE=2 SV=1	--	--	--	--	--	--	--	--	--	--	GO:0009314//response to radiation;GO:0009720//detection of hormone stimulus;GO:0010468//regulation of gene expression;GO:0034097//response to cytokine stimulus;GO:0006351//transcription, DNA-dependent	GO:0030528//transcription regulator activity;GO:0003677//DNA binding	GO:0043231//intracellular membrane-bounded organelle;GO:0044444//cytoplasmic part
fd_1092	GAAC01000891	233	6	3.0272	gi|115478915|ref|NP_001063051.1|	128	2e-29	Os09g0379900 [Oryza sativa Japonica Group] >gi|113631284|dbj|BAF24965.1| Os09g0379900 [Oryza sativa Japonica Group]	--	--	--	--	YLR144c	47.4	6e-06	COG5498	Predicted glycosyl hydrolase	--	--	--	--	--	GO:0009056//catabolic process	GO:0004553//hydrolase activity, hydrolyzing O-glycosyl compounds;GO:0004871//signal transducer activity	-
fd_1093	GAAC01000892	231	7	3.5623	gi|15237560|ref|NP_201196.1|	74.7	3e-13	FCLY (FARNESYLCYSTEINE LYASE); prenylcysteine oxidase [Arabidopsis thaliana] >gi|12644543|sp|P57681.1|PCYOX_ARATH RecName: Full=Probable prenylcysteine oxidase; Flags: Precursor	sp|P57681|PCYOX_ARATH	74.7	2e-13	Probable prenylcysteine oxidase OS=Arabidopsis thaliana GN=At5g63910 PE=2 SV=1	--	--	--	--	--	K05906	1e-14	74.7	ath:AT5G63910	prenylcysteine oxidase [EC:1.8.3.5]	GO:0006644//phospholipid metabolic process;GO:0009755//hormone-mediated signaling pathway;GO:0030329	GO:0016670//oxidoreductase activity, acting on sulfur group of donors, oxygen as acceptor	GO:0043231//intracellular membrane-bounded organelle;GO:0016020//membrane
fd_1094	--	172	2	1.3669	--	--	--	--	--	--	--	--	--	--	--	--	--	--	--	--	--	--	-	-	-
fd_1095	GAAC01000893	486	36	8.7078	gi|11558192|emb|CAC17702.1|	59.3	2e-08	transcription factor (E2F) [Chenopodium rubrum]	--	--	--	--	--	--	--	--	--	--	--	--	--	--	GO:0006350//transcription	-	-
fd_1096	--	152	11	8.5073	gi|115488190|ref|NP_001066582.1|	91.3	3e-18	Os12g0284000 [Oryza sativa Japonica Group] >gi|113649089|dbj|BAF29601.1| Os12g0284000 [Oryza sativa Japonica Group]	--	--	--	--	--	--	--	--	--	--	--	--	--	--	-	GO:0017016//Ras GTPase binding	-
fd_1097	--	152	83	64.1915	gi|222424564|dbj|BAH20237.1|	98.2	3e-20	AT2G01970 [Arabidopsis thaliana]	sp|Q9DBU0|TM9S1_MOUSE	52.4	9e-07	Transmembrane 9 superfamily member 1 OS=Mus musculus GN=Tm9sf1 PE=2 SV=2	--	--	--	--	--	--	--	--	--	--	-	-	GO:0005618//cell wall;GO:0031224//intrinsic to membrane;GO:0031410//cytoplasmic vesicle;GO:0043231//intracellular membrane-bounded organelle
[truncated: 74,434 more rows]
